# Supplementary material for: A waste-minimized approach for the synthesis of iodinated organic borazines
Source: Royal Society of Chemistry journal article supplement (doi:10.1039/d4gc00699b), 2024-01-01

## ELECTRONIC SUPPORTING INFORMATION

### A waste-minimized approach for the synthesis of iodinated organic borazines

Dario Marchionni<sup>1</sup>, Daniele Gernini<sup>1</sup>, Alireza Nazari Khodadadi<sup>1</sup>, Ejdi Cela<sup>1</sup>, Fan Huang<sup>1</sup>, Luigi Vaccaro<sup>1\*</sup>

<sup>1</sup>Laboratory of Green Synthetic Organic Chemistry. – Dipartimento di Chimica, biologia e Biotecnologie, Università degli Studi di Perugia, Via Elce di Sotto 8, 06123 – Perugia – I;

\*E-mail: [luigi.vaccaro@unipg.it](mailto:luigi.vaccaro@unipg.it)

#### Table of content:

|                                |    |
|--------------------------------|----|
| 1. General Remarks .....       | 1  |
| 2. Solubility data .....       | 2  |
| 3. Green Metrics .....         | 3  |
| 4. General procedures .....    | 7  |
| 5. Characterization Data ..... | 9  |
| 5. NMR Spectral Data .....     | 30 |

### 1. General Remarks

Unless otherwise stated, all chemicals were purchased and used without any further purification. Melting points were measured on a Büchi 510 apparatus. <sup>1</sup>H, <sup>13</sup>C, <sup>19</sup>F and <sup>11</sup>B NMR spectra were recorded on a Bruker DRX-ADVANCE 400 MHz (<sup>1</sup>H at 400 MHz, NS = 4, d1 = 5s, SW = 20.0254 ppm., <sup>13</sup>C at 100.6 MHz, NS = 2000, d1 = 1s, SW = 238.8967 ppm., <sup>11</sup>B at 128.4 MHz, NS = 1024, d1 = 1s, SW = 397.4245 ppm., <sup>19</sup>F at 376.5 MHz, NS = 30, d1 = 2s, SW = 249,0300 ppm.). Chemical shifts are reported in ppm ( $\delta$ ), coupling constant (J) in hertz and multiplicity are reported as follows: s = singlet, bs = broad singlet, d = doublet, dd = double doublet, td = double triplet, t = triplet, m = multiplet. HPLC optimization was done using an Agilent 1100 series HPLC system equipped with Agilent Zorbax Eclipse XDB-C8 4.6x150mm or ACE 5 C8 4.6x150mm, UV-Vis detector set at 254 nm with acetonitrile as solvent, 1 to 2 mL/min as flow rate. Elemental analysis was performed using Elementar UNICUBE<sup>®</sup> elemental analyzer. Mechanochemical reactions were performed on a Retsch MM200 vibratory ball-mill equipped with a zirconium oxide jar and ball. Unless otherwise stated, no precautions were taken to exclude air or moisture from reaction environment.

## 2. Solubility data

**Table S1.** Solubility screening for borazine **11** at 25 °C.

| < 0.5g/100mL                                                                           | Between 0.5g/100mL and 1g/100mL | > 1g/100mL                       |
|----------------------------------------------------------------------------------------|---------------------------------|----------------------------------|
| MTBE<br>CPME<br>2Me2BuOH<br>Acetone<br>MeCN<br>DMC<br>GVL<br>DMF<br>Toluene<br>Anisole | 2MeTHF<br>EtOAc                 | DCM<br>CHCl <sub>3</sub><br>PhCl |

Screening performed by dissolving 50 mg of borazine **11** in 10 mL of solvent at 25 °C under strong stirring, if a transparent solution was obtained after 30 min stirring borazine was considered having a solubility higher than 0.5g/100mL and further 50 mg of borazine were added and stirred for 30 minutes, again if a transparent solution was obtained the borazine was then considered having a solubility higher than 1g/100mL.

**Table S2.** Qualitative solubility data for borazine **11** in hot or boiling solvents.

| Solvent    | Temperature (°C) | Solubility (g/100mL) |
|------------|------------------|----------------------|
| MTBE       | 55 <sup>a</sup>  | <0.95                |
| CPME       | 106 <sup>a</sup> | >0.95 <sup>b</sup>   |
| 2MeTHF     | 50               | >0.95                |
| 2MeTHF     | 78 <sup>a</sup>  | >0.95 <sup>b</sup>   |
| 2Me2BuOH   | 102 <sup>a</sup> | <0.95 <sup>b</sup>   |
| Acetone    | 56 <sup>a</sup>  | <0.95                |
| MeCN       | 82 <sup>a</sup>  | <0.95                |
| EtOAc      | 77 <sup>a</sup>  | >1.9                 |
| Anisole    | 120              | >0.95 <sup>b</sup>   |
| DMC        | 90 <sup>a</sup>  | <0.95                |
| Toluene    | 100              | >1.9 <sup>b</sup>    |
| Mesitylene | 100              | >1.9 <sup>b</sup>    |
| GVL        | 150              | <0.95                |
| DMF dry    | 140              | >9.5                 |
| PhCl       | 100              | >4.75 <sup>b</sup>   |

<sup>a</sup>Boiling, <sup>b</sup>Partial degradation observed by HPLC analysis of the resulting solution.

Data obtained by stirring 95 mg of iodoborazine **11** with preheated solvent for 20 minutes, borazine was assumed to be soluble upon complete homogenization of the mixture to a transparent solution.

**Table S3.** Quantitative solubility data for solvents in which borazine **11** has a solubility higher than 0.5g/100mL at 25 °C.

| Solvent           | Solubility of 11 (g/100mL) | Solubility of 1 (g/100mL) |
|-------------------|----------------------------|---------------------------|
| 2MeTHF            | 0.7                        | 3.5                       |
| EtOAc             | 0.9                        | 4.1                       |
| PhCl              | 3.3                        | 5.9                       |
| DCM               | 17.4                       | 25.7                      |
| CHCl <sub>3</sub> | 15.8                       | 22.2                      |

Solubility determined through gravimetric analysis. Starting material and iodination intermediates were generally found to be more soluble than the final product.

### 3. Green Metrics

#### - Large-scale procedure using I<sub>2</sub>, AgNO<sub>3</sub> (solution)

**Reactants:**

Borazine **1**: 0.874 g, 873.74 g/mol, 1 mmol

I<sub>2</sub>: 0.787 g, 253.81 g/mol, 3.1 mmol

AgNO<sub>3</sub>: 0.510 g, 169.87 g/mol, 3 mmol

**Reaction Medium:**

DCM: 16 mL, 21.28 g

MeCN: 4 mL, 3.13 g

**Catalysts:** None.

**Workup Materials:** None.

**Purification:**

MeOH: 20 mL, 15.84 g

DCM: 20 mL, 26.6 g

Celite: 1g

**Recycling-Recovery of Materials:** None.

**Product:** Borazine **11** 1.198 g, 1251.42 g/mol

E-Factor:  $\frac{((2.171 \text{ g})_{\text{reactants}} + (24.41 \text{ g})_{\text{reaction medium}} + (43,44 \text{ g})_{\text{purification materials}} - (1.198 \text{ g})_{\text{product}})}{(1.198 \text{ g})_{\text{product}}} = 57.45$

- **Large-scale procedure using I<sub>2</sub>, AgNO<sub>3</sub>, MeCN (LAG) (ball-milling)**

**Reactants:**

Borazine **1**: 0.874 g, 873.74 g/mol, 1 mmol

I<sub>2</sub>: 0.685 g, 253.81 g/mol, 2.7 mmol

AgNO<sub>3</sub>: 0.408 g, 169.87 g/mol, 2.4 mmol

**Reaction Medium:**

MeCN: 0.5 mL, 0.392 g

**Catalysts:** None.

**Workup Materials:** None.

**Purification:**

MeOH: 20 mL, 15.84 g

DCM: 20 mL, 26.6 g

Celite: 1g

**Recycling-Recovery of Materials:** None.

**Product:** Borazine **11** 1.105 g, 1251.42 g/mol

E-Factor:  $((1.967 \text{ g})_{\text{reactants}} + (0.392 \text{ g})_{\text{reaction medium}} + (43,44 \text{ g})_{\text{purification materials}} - (1.105 \text{ g})_{\text{product}}) / (1.105 \text{ g})_{\text{product}} = 40.45$

- **Large-scale procedure using I<sub>2</sub>, NaNO<sub>3</sub>, TsOH (ball-milling)**

**Reactants:**

Borazine **1**: 0.874 g, 873.74 g/mol, 1 mmol

I<sub>2</sub>: 0.381 g, 253.81 g/mol, 1.5 mmol

NaNO<sub>3</sub>: 0.255 g, 85 g/mol, 3 mmol

**Reaction Medium:** None.

**Catalysts:**

TsOH: 0.571 g, 190.22 g/mol, 3 mmol

**Workup Materials:** None.

**Purification:**

MeOH: 12 mL, 9.504 g

Na<sub>2</sub>S<sub>2</sub>O<sub>3</sub> · 5 H<sub>2</sub>O: 0.1g

**Recycling-Recovery of Materials:**

MeOH: 7.68 g

**Product:** Borazine **11** 1.146 g, 1251.42 g/mol

E-Factor:  $((1.51 \text{ g})_{\text{reactants}} + (0.571 \text{ g})_{\text{catalyst}} + (9.604 \text{ g})_{\text{purification materials}} - (7.68 \text{ g})_{\text{recovered materials}} - (1.146 \text{ g})_{\text{product}}) / (1.146 \text{ g})_{\text{product}} = 2.49$

## - Large-scale procedure using NIS, TsOH (ball-milling)

### Reactants:

Borazine **1**: 0.874 g, 873.74 g/mol, 1 mmol

NIS: 0.675 g, 224.99 g/mol, 3 mmol

**Reaction Medium:** None.

### Catalysts:

TsOH: 0.571 g, 190.22 g/mol, 3 mmol

**Workup Materials:** None.

### Purification:

MeOH: 12 mL, 9.504 g

Na<sub>2</sub>S<sub>2</sub>O<sub>3</sub> · 5 H<sub>2</sub>O: 0.1g

### Recycling-Recovery of Materials:

MeOH: 7.23 g

**Product:** Borazine **11** 1.146 g, 1251.42 g/mol

E-Factor:  $((1.549 \text{ g})_{\text{reactants}} + (0.571 \text{ g})_{\text{catalyst}} + (9.604 \text{ g})_{\text{purification materials}} - (7.23)_{\text{recovered materials}} - (1.186 \text{ g})_{\text{product}}) / (1.186 \text{ g})_{\text{product}} = 2.79$

**Table S4.** Comparison of different mass based green metrics for the four iodination processes.

| Method                                       | E-factor | AE    | RME   | MRP   | 1/SF  | Rxn Yield | VMR   |
|----------------------------------------------|----------|-------|-------|-------|-------|-----------|-------|
| I <sub>2</sub> /AgNO <sub>3</sub> /DCM/MeCN  | 57.45    | 0.583 | 0.017 | 0.031 | 0.988 | 0.957     | 0.668 |
| I <sub>2</sub> /AgNO <sub>3</sub> /MeCN(LAG) | 40.45    | 0.736 | 0.024 | 0.043 | 0.864 | 0.883     | 0.644 |
| I <sub>2</sub> /NaNO <sub>3</sub> /TsOH      | 2.49     | 0.906 | 0.286 | 0.377 | 0.915 | 0.915     | 0.738 |
| NIS/TsOH                                     | 2.79     | 0.808 | 0.264 | 0.345 | 1.000 | 0.947     | 0.740 |

## 4. General procedures

### **Optimization of mechanochemical iodination of borazine using iodine and silver nitrate**

**(Table 1):** Milling jar was filled with Borazine, I<sub>2</sub>, AgNO<sub>3</sub>, LAG additive when used and the zirconium oxide ball. The jar was closed, and the content was milled at 30 Hz for the indicated time. The resulting powder was scraped from the jar, the jar was washed thoroughly with DCM and the resulting suspension was added to the scraped powder. After complete dissolution of the borazine the suspension was filtered over celite to remove AgI byproduct, the solvent was concentrated under vacuum and the product crystallized with MeOH.

### **Optimization of iodinating systems (Table 2):**

**Small-scale procedure entry 1:** Borazine 0.08 mmol 1 eq, and I<sub>2</sub> 3.1 eq were added to a 4 mL vial containing DCM 1280 uL, upon complete dissolution and under strong stirring a solution of 3 eq AgNO<sub>3</sub> in 320 uL of MeCN was dropwised into the vial, the vial was capped and left stirring for 1h at room temperature. The solution was subsequently concentrated to dryness, dissolved in dichloromethane, filtered over celite to remove AgI byproduct and the product crystallized with methanol.

**Small-scale procedure entry 2:** Milling jar was filled with Borazine 0.08 mmol 1 eq, 2.7 eq I<sub>2</sub>, 2.4 eq AgNO<sub>3</sub>, 40 uL MeCN and the zirconium oxide ball. The jar was closed, and the content was milled at 30 Hz for 1h. The resulting powder was scraped from the jar, the jar was washed thoroughly with DCM and the resulting suspension was added to the scraped powder. After complete dissolution of the borazine the suspension was filtered over celite to remove AgI byproduct, the solvent was concentrated under vacuum and the product crystallized with MeOH.

**Small-scale procedure entry 3:** Milling jar was filled with Borazine 0.08 mmol 1 eq, 3 eq KI, 3 eq Oxone, and the zirconium oxide ball. The jar was closed, and the content was milled at 30 Hz for 1h. The resulting powder was scraped from the jar, the jar was washed thoroughly with MeOH and the resulting suspension was added to the scraped powder. The suspension in MeOH was sonicated for 10 minutes then filtered to recover the borazine product.

**Small-scale procedure entry 4:** Milling jar was filled with Borazine 0.08 mmol 1 eq, 1.5 eq I<sub>2</sub>, 3 eq NaNO<sub>3</sub>, 3 eq TsOH and the zirconium oxide ball. The jar was closed, and the content was milled at 30 Hz for 1h. The resulting powder was scraped from the jar, the jar was washed thoroughly with MeOH and the resulting suspension was added to the scraped powder. The suspension in MeOH was sonicated for 10 minutes then filtered to recover the borazine product.

**Small-scale procedure entry 5:** Milling jar was filled with Borazine 0.08 mmol 1 eq, NaI 3 eq, H<sub>2</sub>O<sub>2</sub> 30% aq. 6 eq, TsOH 3 eq and the zirconium oxide ball. The jar was closed, and the content was milled at 30 Hz for 1h. The resulting powder was scraped from the jar, the jar was washed thoroughly with MeOH and the resulting suspension was added to the scraped powder. The suspension in MeOH was sonicated for 10 minutes then filtered to recover the borazine product

**Small-scale procedure entry 6:** Milling jar was filled with Borazine 0.08 mmol 1 eq, 3 eq NIS, 3 eq TsOH and the zirconium oxide ball. The jar was closed, and the content was milled at 30 Hz for 1h. The resulting powder was scraped from the jar, the jar was washed thoroughly with MeOH and the resulting suspension was added to the scraped powder. The suspension in MeOH was sonicated for 10 minutes then filtered to recover the borazine product.

### **Large-scale procedures (Table 3):**

**Large-scale procedure using I<sub>2</sub>, AgNO<sub>3</sub>, DCM/MeCN in solution:** Borazine 1 mmol 1 eq, I<sub>2</sub> 3.1 eq., were added to a round-bottom flask containing DCM 16 mL, upon complete dissolution and

under strong stirring a solution of 3 eq  $\text{AgNO}_3$  in 4 mL of MeCN was dropwised into the flask, the flask was capped and left stirring for 1h at room temperature. The solution was subsequently concentrated to dryness, dissolved in 20 mL dichloromethane, filtered over celite to remove AgI byproduct, concentrated under vacuum and the product crystallized with 20 mL methanol.

**Large-scale procedure using  $\text{I}_2$ ,  $\text{AgNO}_3$ , MeCN Liquid Assisted Grinding:** Milling jar was filled with Borazine 1 mmol 1 eq, 2.7 eq  $\text{I}_2$ , 2.4 eq  $\text{AgNO}_3$ , 500  $\mu\text{L}$  MeCN and the zirconium oxide ball. The jar was closed, and the content was milled at 30 Hz for 1h. The resulting powder was scraped from the jar, the jar was washed thoroughly with 20 mL DCM and the resulting suspension was added to the scraped powder. After complete dissolution of the borazine the suspension was filtered over celite to remove AgI byproduct, the solvent was concentrated under vacuum and the product crystallized with 20 mL MeOH.

**Large-scale procedure using  $\text{I}_2$ ,  $\text{NaNO}_3$ , TsOH grinding:** Milling jar was filled with Borazine 1 mmol 1 eq, 1.5 eq  $\text{I}_2$ , 3 eq  $\text{NaNO}_3$ , 3 eq TsOH and the zirconium oxide ball. The jar was closed, and the content was milled at 30 Hz for 1h. The resulting powder was scraped from the jar, the jar was washed thoroughly with 12 mL MeOH and the resulting suspension was added to the scraped powder. The suspension in MeOH was sonicated for 10 minutes then filtered to recover the borazine product.

Solvent was scrubbed of residual iodine by addition of 100 mg of  $\text{Na}_2\text{S}_2\text{O}_3 \cdot 5 \text{H}_2\text{O}$ , then distilled to afford 7.68 g of clean MeOH

**Large-scale procedure using NIS, TsOH grinding:** Milling jar was filled with Borazine 1 mmol 1 eq, 3 eq NIS, 3 eq TsOH and the zirconium oxide ball. The jar was closed, and the content was milled at 30 Hz for 1h. The resulting powder was scraped from the jar, the jar was washed thoroughly with 12 mL MeOH and the resulting suspension was added to the scraped powder. The suspension in MeOH was sonicated for 10 minutes then filtered to recover the borazine product.

Solvent was scrubbed of residual iodine by addition of 100 mg of  $\text{Na}_2\text{S}_2\text{O}_3 \cdot 5 \text{H}_2\text{O}$ , then distilled to afford 7.23 g of clean MeOH



## 5. Characterization Data

|                                                                                                                                                                                                                                                                                                                                                                                                                                                                                                                                                                                                                                                                                                                                                                                                                                                                                                                                                                                                                                                                                                                                                                                                                                                                                                                                                                                                                                                                                                                                                                                                                                                                                                          |                                                                                                      |                                                  |                       |                   |
|----------------------------------------------------------------------------------------------------------------------------------------------------------------------------------------------------------------------------------------------------------------------------------------------------------------------------------------------------------------------------------------------------------------------------------------------------------------------------------------------------------------------------------------------------------------------------------------------------------------------------------------------------------------------------------------------------------------------------------------------------------------------------------------------------------------------------------------------------------------------------------------------------------------------------------------------------------------------------------------------------------------------------------------------------------------------------------------------------------------------------------------------------------------------------------------------------------------------------------------------------------------------------------------------------------------------------------------------------------------------------------------------------------------------------------------------------------------------------------------------------------------------------------------------------------------------------------------------------------------------------------------------------------------------------------------------------------|------------------------------------------------------------------------------------------------------|--------------------------------------------------|-----------------------|-------------------|
| Chem. Name                                                                                                                                                                                                                                                                                                                                                                                                                                                                                                                                                                                                                                                                                                                                                                                                                                                                                                                                                                                                                                                                                                                                                                                                                                                                                                                                                                                                                                                                                                                                                                                                                                                                                               | <b>B,B',B''-Tris(4-(tertbutyl)-2,6-dimethylphenyl)-N,N',N''-tris(3,5-dimethylphenyl)borazine (1)</b> |                                                  |                       |                   |
| 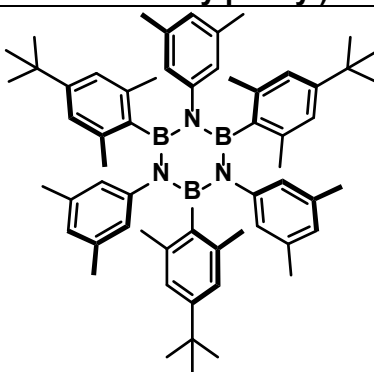 <p>Molecular Weight: 873,73</p>                                                                                                                                                                                                                                                                                                                                                                                                                                                                                                                                                                                                                                                                                                                                                                                                                                                                                                                                                                                                                                                                                                                                                                                                                                                                                                                                                                                                                                                                                                                                                                                        |                                                                                                      |                                                  |                       |                   |
| <b>METHOD:</b>                                                                                                                                                                                                                                                                                                                                                                                                                                                                                                                                                                                                                                                                                                                                                                                                                                                                                                                                                                                                                                                                                                                                                                                                                                                                                                                                                                                                                                                                                                                                                                                                                                                                                           |                                                                                                      |                                                  |                       |                   |
| <p>To an oven-dried 50 mL Schlenk tube under dry argon atmosphere were added 6 mmol (748 <math>\mu</math>L) of dry 3,5-dimethylaniline (distilled under vacuum from calcium hydride) followed by addition of 14 mL dry toluene. 1.25 eq (7.5 mL) of <math>\text{BCl}_3</math> 1 M in heptane were dropwisely slowly in this solution at <math>0^\circ\text{C}</math> under strong stirring. After 1h stirring the Schlenk was equipped with a condenser and a calcium chloride drying tube, the resulting solution was refluxed at <math>110^\circ\text{C}</math> for 20h, the Schlenk was then cooled to room temperature and subjected to 5 freeze-pump-thaw cycles to remove excess of HCl. The thus obtained chloroborazole intermediate was diluted with 8 mL of dry THF and 6 mL of dry toluene as cosolvent, then cannulated slowly in a stirred solution of aryllithium at <math>0^\circ\text{C}</math> and left to react for 20h. Aryllithium was prepared treating 4-tertbutyl-2,6-dimethylbromobenzene 1.8 eq (10.8 mmol, 2.6 g) dissolved in dry THF 24 mL with n-butyl lithium 3.1 eq (11.5 mL) 1.6 M in hexanes at <math>-78^\circ\text{C}</math> then gradually warming up to <math>0^\circ\text{C}</math>, the solution was kept stirring for 10 minutes before cannulating. The final product was added to a separatory funnel together with 50 mL DCM and extracted twice with 50 mL water then with 50 mL brine. Organic phase was dried over sodium sulfate then stripped of solvent under vacuum, dispersed in chloroform and crystallized with MeOH, product was filtered under vacuum and left to dry for 30 minutes affording pure product as a white solid <b>1.3g 74%</b>.</p> |                                                                                                      |                                                  |                       |                   |
| <b>Mol Formula</b>                                                                                                                                                                                                                                                                                                                                                                                                                                                                                                                                                                                                                                                                                                                                                                                                                                                                                                                                                                                                                                                                                                                                                                                                                                                                                                                                                                                                                                                                                                                                                                                                                                                                                       |                                                                                                      | $\text{C}_{60}\text{H}_{78}\text{B}_3\text{N}_3$ | <b>m. p.</b>          |                   |
|                                                                                                                                                                                                                                                                                                                                                                                                                                                                                                                                                                                                                                                                                                                                                                                                                                                                                                                                                                                                                                                                                                                                                                                                                                                                                                                                                                                                                                                                                                                                                                                                                                                                                                          |                                                                                                      |                                                  | $> 300^\circ\text{C}$ |                   |
| <b><math>^1\text{H}</math> NMR<br/>(400 MHz,<br/><math>\text{CDCl}_3</math>)</b>                                                                                                                                                                                                                                                                                                                                                                                                                                                                                                                                                                                                                                                                                                                                                                                                                                                                                                                                                                                                                                                                                                                                                                                                                                                                                                                                                                                                                                                                                                                                                                                                                         | <b><math>\delta</math> Value</b>                                                                     | <b>No. H</b>                                     | <b>Mult.</b>          | <b>J Value/Hz</b> |
|                                                                                                                                                                                                                                                                                                                                                                                                                                                                                                                                                                                                                                                                                                                                                                                                                                                                                                                                                                                                                                                                                                                                                                                                                                                                                                                                                                                                                                                                                                                                                                                                                                                                                                          | 1.08                                                                                                 | 27                                               | s                     |                   |
|                                                                                                                                                                                                                                                                                                                                                                                                                                                                                                                                                                                                                                                                                                                                                                                                                                                                                                                                                                                                                                                                                                                                                                                                                                                                                                                                                                                                                                                                                                                                                                                                                                                                                                          | 1.86                                                                                                 | 18                                               | s                     |                   |
|                                                                                                                                                                                                                                                                                                                                                                                                                                                                                                                                                                                                                                                                                                                                                                                                                                                                                                                                                                                                                                                                                                                                                                                                                                                                                                                                                                                                                                                                                                                                                                                                                                                                                                          | 2.19                                                                                                 | 18                                               | s                     |                   |
|                                                                                                                                                                                                                                                                                                                                                                                                                                                                                                                                                                                                                                                                                                                                                                                                                                                                                                                                                                                                                                                                                                                                                                                                                                                                                                                                                                                                                                                                                                                                                                                                                                                                                                          | 6.27                                                                                                 | 3                                                | s                     |                   |
|                                                                                                                                                                                                                                                                                                                                                                                                                                                                                                                                                                                                                                                                                                                                                                                                                                                                                                                                                                                                                                                                                                                                                                                                                                                                                                                                                                                                                                                                                                                                                                                                                                                                                                          | 6.32                                                                                                 | 6                                                | s                     |                   |
|                                                                                                                                                                                                                                                                                                                                                                                                                                                                                                                                                                                                                                                                                                                                                                                                                                                                                                                                                                                                                                                                                                                                                                                                                                                                                                                                                                                                                                                                                                                                                                                                                                                                                                          | 6.51                                                                                                 | 6                                                | s                     |                   |
| <b><math>^{13}\text{C}</math> NMR (100.6 MHz, <math>\text{CDCl}_3</math>) <math>\delta</math>:</b> 149.2, 146.0, 137.2, 135.3, 125.6, 125.2, 122.1, 34.0, 31.3, 23.4, 20.9. (One peak is missing due to boron quadrupolar relaxation)                                                                                                                                                                                                                                                                                                                                                                                                                                                                                                                                                                                                                                                                                                                                                                                                                                                                                                                                                                                                                                                                                                                                                                                                                                                                                                                                                                                                                                                                    |                                                                                                      |                                                  |                       |                   |
| <b><math>^{11}\text{B}</math> NMR (128.4 MHz, <math>\text{CDCl}_3</math>) <math>\delta</math>:</b> 37.1                                                                                                                                                                                                                                                                                                                                                                                                                                                                                                                                                                                                                                                                                                                                                                                                                                                                                                                                                                                                                                                                                                                                                                                                                                                                                                                                                                                                                                                                                                                                                                                                  |                                                                                                      |                                                  |                       |                   |
| <b>Anal. Calcd.:</b> C, 82.48; H, 9.00; N, 4.81; <b>Found:</b> C, 82.23; 9.29; 4.86;                                                                                                                                                                                                                                                                                                                                                                                                                                                                                                                                                                                                                                                                                                                                                                                                                                                                                                                                                                                                                                                                                                                                                                                                                                                                                                                                                                                                                                                                                                                                                                                                                     |                                                                                                      |                                                  |                       |                   |

|            |                                                                                       |
|------------|---------------------------------------------------------------------------------------|
| Chem. Name | <b>B,B',B''-Tris(2,6-dimethylphenyl)-N,N',N''-tris(4-tertbutylphenyl)borazine (2)</b> |
|------------|---------------------------------------------------------------------------------------|

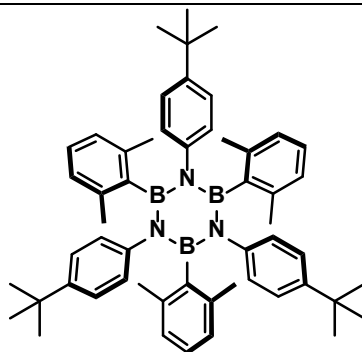

Molecular Weight: 789,57

**METHOD:**

To an oven-dried 50 mL Schlenk tube under dry argon atmosphere were added 6 mmol (956  $\mu$ L) of dry 4-tertbutylaniline (distilled under vacuum from calcium hydride) followed by addition of 9 mL dry toluene. 1.25 eq (7.5 mL) of  $\text{BCl}_3$  1 M in heptane were dropwisely slowly in this solution at  $0^\circ\text{C}$  under strong stirring. After 1h stirring the Schlenk was equipped with a condenser and a calcium chloride drying tube, the resulting solution was refluxed at  $110^\circ\text{C}$  for 20h, the Schlenk was then cooled to room temperature and subjected to 5 freeze-pump-thaw cycles to remove excess of HCl. The thus obtained chloroborazole intermediate was then cannulated slowly in a stirred solution of aryllithium at  $0^\circ\text{C}$  and left to react for 20h. Aryllithium was prepared treating 2-bromoxylene 1.8 eq (10.8 mmol, 1.44 mL) dissolved in dry THF 20 mL with n-butyl lithium 3.1 eq (11.5 mL) 1.6 M in hexanes at  $-78^\circ\text{C}$  then gradually warming up to  $0^\circ\text{C}$ , the solution was kept stirring for 10 minutes before cannulating. The final product was added to a separatory funnel together with 50 mL DCM and extracted twice with 50 mL water then with 50 mL brine. Organic phase was dried over sodium sulfate then stripped of solvent under vacuum, dispersed in chloroform and crystallized with MeOH, product was filtered under vacuum and left to dry for 30 minutes affording pure product as a white solid **59% 926 mg**.

| Mol Formula                                                                                                                                                                                                                     |                                  | $\text{C}_{54}\text{H}_{66}\text{B}_3\text{N}_3$ | m. p.        |                   | $> 300^\circ\text{C}$ |
|---------------------------------------------------------------------------------------------------------------------------------------------------------------------------------------------------------------------------------|----------------------------------|--------------------------------------------------|--------------|-------------------|-----------------------|
| <b><math>^1\text{H}</math> NMR<br/>(400 MHz,<br/><math>\text{CDCl}_3</math>)</b>                                                                                                                                                | <b><math>\delta</math> Value</b> | <b>No. H</b>                                     | <b>Mult.</b> | <b>J Value/Hz</b> |                       |
|                                                                                                                                                                                                                                 | 1.02                             | 27                                               | s            |                   |                       |
|                                                                                                                                                                                                                                 | 2.25                             | 18                                               | s            |                   |                       |
|                                                                                                                                                                                                                                 | 6.50-6.48                        | 6                                                | d            | 7.56              |                       |
|                                                                                                                                                                                                                                 | 6.69-6.65                        | 15                                               | m            |                   |                       |
| <b><math>^{13}\text{C}</math> NMR (100.6 MHz, <math>\text{CDCl}_3</math>) <math>\delta</math>: 146.7, 143.4, 137.6, 126.7, 126.4, 125.2, 123.4, 34.0, 31.3, 23.3. (One peak is missing due to boron quadrupolar relaxation)</b> |                                  |                                                  |              |                   |                       |
| <b><math>^{11}\text{B}</math> NMR (128.4 MHz, <math>\text{CDCl}_3</math>) <math>\delta</math>: 36.4</b>                                                                                                                         |                                  |                                                  |              |                   |                       |
| <b>Anal. Calcd.:</b> C, 82.14; H, 8.43; N, 5.32; <b>Found:</b> C, 82.25; H, 8.64; N, 5.37                                                                                                                                       |                                  |                                                  |              |                   |                       |

| Chem. Name                                                                                                                                                                                                                                                                                                                                                                                                                                                                                                                                                                                                                                                                                                                                                                                                                                                                                                                                                                                                                                                                                                                                                                                                                                                                                                                                                                                                                                            | B,B',B''-Tris(2,4,6-trimethylphenyl)-N,N',N''-tris(4-tertbutylphenyl)borazine<br>(3) |                                                               |              |                   |
|-------------------------------------------------------------------------------------------------------------------------------------------------------------------------------------------------------------------------------------------------------------------------------------------------------------------------------------------------------------------------------------------------------------------------------------------------------------------------------------------------------------------------------------------------------------------------------------------------------------------------------------------------------------------------------------------------------------------------------------------------------------------------------------------------------------------------------------------------------------------------------------------------------------------------------------------------------------------------------------------------------------------------------------------------------------------------------------------------------------------------------------------------------------------------------------------------------------------------------------------------------------------------------------------------------------------------------------------------------------------------------------------------------------------------------------------------------|--------------------------------------------------------------------------------------|---------------------------------------------------------------|--------------|-------------------|
| 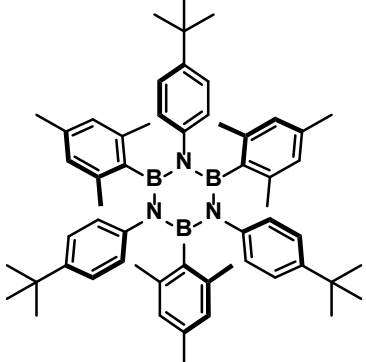                                                                                                                                                                                                                                                                                                                                                                                                                                                                                                                                                                                                                                                                                                                                                                                                                                                                                                                                                                                                                                                                                                                                                                                                                                                                                                                                                                     |                                                                                      |                                                               |              |                   |
| Molecular Weight: 831,65                                                                                                                                                                                                                                                                                                                                                                                                                                                                                                                                                                                                                                                                                                                                                                                                                                                                                                                                                                                                                                                                                                                                                                                                                                                                                                                                                                                                                              |                                                                                      |                                                               |              |                   |
| <b>METHOD:</b>                                                                                                                                                                                                                                                                                                                                                                                                                                                                                                                                                                                                                                                                                                                                                                                                                                                                                                                                                                                                                                                                                                                                                                                                                                                                                                                                                                                                                                        |                                                                                      |                                                               |              |                   |
| <p>To an oven-dried 50 mL Schlenk tube under dry argon atmosphere were added 6 mmol (956 uL) of dry 4-tertbutylaniline (distilled under vacuum from calcium hydride) followed by addition of 9 mL dry toluene. 1.25 eq (7.5 mL) of BCl<sub>3</sub> 1 M in heptane were dropwised slowly in this solution at 0°C under strong stirring. After 1h stirring the Schlenk was equipped with a condenser and a calcium chloride drying tube, the resulting solution was refluxed at 110°C for 20h, the Schlenk was then cooled to room temperature and subjected to 5 freeze-pump-thaw cycles to remove excess of HCl. The thus obtained chloroborazole intermediate was cannulated slowly in a stirred solution of aryllithium at 0°C and left to react for 20h. Aryllithium was prepared treating mesitylbromide 1.8 eq (10.8 mmol, 1.65 mL) dissolved in dry THF 18 mL with n-butyl lithium 3.1 eq (11.5 mL) 1.6 M in hexanes at -78°C then gradually warming up to 0°C, the solution was kept stirring for 10 minutes before cannulating. The final product was added to a separatory funnel together with 50 mL DCM and extracted twice with 50 mL water then with 50 mL brine. Organic phase was dried over sodium sulfate then stripped of solvent under vacuum, dispersed in chloroform and crystallized with MeOH, product was filtered under vacuum and left to dry for 30 minutes affording pure product as a white solid <b>1.08 g 65%</b>.</p> |                                                                                      |                                                               |              |                   |
| <b>Mol Formula</b>                                                                                                                                                                                                                                                                                                                                                                                                                                                                                                                                                                                                                                                                                                                                                                                                                                                                                                                                                                                                                                                                                                                                                                                                                                                                                                                                                                                                                                    |                                                                                      | C <sub>57</sub> H <sub>72</sub> B <sub>3</sub> N <sub>3</sub> |              | <b>m. p.</b>      |
|                                                                                                                                                                                                                                                                                                                                                                                                                                                                                                                                                                                                                                                                                                                                                                                                                                                                                                                                                                                                                                                                                                                                                                                                                                                                                                                                                                                                                                                       |                                                                                      |                                                               |              | 225 °C            |
| <b><sup>1</sup>H NMR<br/>(400 MHz,<br/>CDCl<sub>3</sub>)</b>                                                                                                                                                                                                                                                                                                                                                                                                                                                                                                                                                                                                                                                                                                                                                                                                                                                                                                                                                                                                                                                                                                                                                                                                                                                                                                                                                                                          | <b>δ Value</b>                                                                       | <b>No. H</b>                                                  | <b>Mult.</b> | <b>J Value/Hz</b> |
|                                                                                                                                                                                                                                                                                                                                                                                                                                                                                                                                                                                                                                                                                                                                                                                                                                                                                                                                                                                                                                                                                                                                                                                                                                                                                                                                                                                                                                                       | 1.03                                                                                 | 27                                                            | s            |                   |
|                                                                                                                                                                                                                                                                                                                                                                                                                                                                                                                                                                                                                                                                                                                                                                                                                                                                                                                                                                                                                                                                                                                                                                                                                                                                                                                                                                                                                                                       | 1.96                                                                                 | 9                                                             | s            |                   |
|                                                                                                                                                                                                                                                                                                                                                                                                                                                                                                                                                                                                                                                                                                                                                                                                                                                                                                                                                                                                                                                                                                                                                                                                                                                                                                                                                                                                                                                       | 2.19                                                                                 | 18                                                            | s            |                   |
|                                                                                                                                                                                                                                                                                                                                                                                                                                                                                                                                                                                                                                                                                                                                                                                                                                                                                                                                                                                                                                                                                                                                                                                                                                                                                                                                                                                                                                                       | 6.30                                                                                 | 6                                                             | s            |                   |
|                                                                                                                                                                                                                                                                                                                                                                                                                                                                                                                                                                                                                                                                                                                                                                                                                                                                                                                                                                                                                                                                                                                                                                                                                                                                                                                                                                                                                                                       | 6.70-6.64                                                                            | 12                                                            | m            |                   |
| <b><sup>13</sup>C NMR (100.6 MHz, CDCl<sub>3</sub>) δ:</b> 146.4, 143.7, 137.6, 135.7, 126.5, 126.0, 123.3, 34.0, 31.3, 23.1, 21.0. (One peak is missing due to boron quadrupolar relaxation)                                                                                                                                                                                                                                                                                                                                                                                                                                                                                                                                                                                                                                                                                                                                                                                                                                                                                                                                                                                                                                                                                                                                                                                                                                                         |                                                                                      |                                                               |              |                   |
| <b><sup>11</sup>B NMR (128.4 MHz, CDCl<sub>3</sub>) δ:</b> 36.6                                                                                                                                                                                                                                                                                                                                                                                                                                                                                                                                                                                                                                                                                                                                                                                                                                                                                                                                                                                                                                                                                                                                                                                                                                                                                                                                                                                       |                                                                                      |                                                               |              |                   |
| <b>Anal. Calcd.:</b> C, 82.32; H, 8.73; N, 5.05; <b>Found:</b> C, 82.02; H, 8.52; N, 5.18                                                                                                                                                                                                                                                                                                                                                                                                                                                                                                                                                                                                                                                                                                                                                                                                                                                                                                                                                                                                                                                                                                                                                                                                                                                                                                                                                             |                                                                                      |                                                               |              |                   |

| Chem. Name                                                                                                                                                                                                                                                                                                                                                                                                                                                                                                                                                                                                                                                                                                                                                                                                                                                                                                                                                                                                                                                                                                                                                                                                                                                                                                                                                                                                                                                                                                                                                                                       | <b>B,B',B''-Tris(2,3,5,6-tetramethylphenyl)-N,N',N''-tris(4-tertbutylphenyl)borazine (4)</b> |                                                               |              |                   |          |
|--------------------------------------------------------------------------------------------------------------------------------------------------------------------------------------------------------------------------------------------------------------------------------------------------------------------------------------------------------------------------------------------------------------------------------------------------------------------------------------------------------------------------------------------------------------------------------------------------------------------------------------------------------------------------------------------------------------------------------------------------------------------------------------------------------------------------------------------------------------------------------------------------------------------------------------------------------------------------------------------------------------------------------------------------------------------------------------------------------------------------------------------------------------------------------------------------------------------------------------------------------------------------------------------------------------------------------------------------------------------------------------------------------------------------------------------------------------------------------------------------------------------------------------------------------------------------------------------------|----------------------------------------------------------------------------------------------|---------------------------------------------------------------|--------------|-------------------|----------|
| 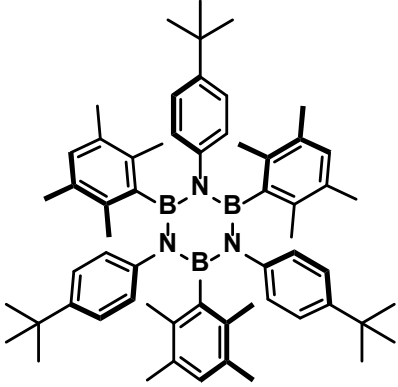 <p data-bbox="646 660 949 694">Molecular Weight: 873,73</p>                                                                                                                                                                                                                                                                                                                                                                                                                                                                                                                                                                                                                                                                                                                                                                                                                                                                                                                                                                                                                                                                                                                                                                                                                                                                                                                                                                                                                                                    |                                                                                              |                                                               |              |                   |          |
| <p><b>METHOD:</b><br/>           To an oven-dried 50 mL Schlenk tube under dry argon atmosphere were added 6 mmol (956 uL) of dry 4-tertbutylaniline (distilled under vacuum from calcium hydride) followed by addition of 9 mL dry toluene. 1.25 eq (7.5 mL) of BCl<sub>3</sub> 1 M in heptane were dropwisely slowly in this solution at 0°C under strong stirring. After 1h stirring the Schlenk was equipped with a condenser and a calcium chloride drying tube, the resulting solution was refluxed at 110°C for 20h, the Schlenk was then cooled to room temperature and subjected to 5 freeze-pump-thaw cycles to remove excess of HCl. The thus obtained chloroborazole intermediate was cannulated slowly in a stirred solution of aryllithium at 0°C and left to react for 20h. Aryllithium was prepared treating Bromodurene 1 eq (6 mmol, 1.28 g) dissolved in dry THF 20 mL with t-butyl lithium 2 eq (7.1 mL) 1.7 M in pentane at -78°C then gradually warming up to 0°C, the solution was kept stirring for 10 minutes before cannulating. The final product was quenched by addition of a small volume of water, added to a separatory funnel together with 100 mL DCM and extracted twice with 50 mL water then with 50 mL brine. Carefully extracting a second time each water fraction with more DCM. Organic phase was dried over sodium sulfate then stripped of solvent under vacuum, dispersed in chloroform and crystallized with MeOH, product was filtered under vacuum and left to dry for 30 minutes affording pure product as a white solid <b>934 mg 53%</b>.</p> |                                                                                              |                                                               |              |                   |          |
| <b>Mol Formula</b>                                                                                                                                                                                                                                                                                                                                                                                                                                                                                                                                                                                                                                                                                                                                                                                                                                                                                                                                                                                                                                                                                                                                                                                                                                                                                                                                                                                                                                                                                                                                                                               |                                                                                              | C <sub>60</sub> H <sub>78</sub> B <sub>3</sub> N <sub>3</sub> |              | <b>m. p.</b>      | > 300 °C |
| <b><sup>1</sup>H NMR<br/>(400 MHz,<br/>CDCl<sub>3</sub>)</b>                                                                                                                                                                                                                                                                                                                                                                                                                                                                                                                                                                                                                                                                                                                                                                                                                                                                                                                                                                                                                                                                                                                                                                                                                                                                                                                                                                                                                                                                                                                                     | <b>δ Value</b>                                                                               | <b>No. H</b>                                                  | <b>Mult.</b> | <b>J Value/Hz</b> |          |
|                                                                                                                                                                                                                                                                                                                                                                                                                                                                                                                                                                                                                                                                                                                                                                                                                                                                                                                                                                                                                                                                                                                                                                                                                                                                                                                                                                                                                                                                                                                                                                                                  | 1.02                                                                                         | 27                                                            | s            |                   |          |
|                                                                                                                                                                                                                                                                                                                                                                                                                                                                                                                                                                                                                                                                                                                                                                                                                                                                                                                                                                                                                                                                                                                                                                                                                                                                                                                                                                                                                                                                                                                                                                                                  | 1.85                                                                                         | 18                                                            | s            |                   |          |
|                                                                                                                                                                                                                                                                                                                                                                                                                                                                                                                                                                                                                                                                                                                                                                                                                                                                                                                                                                                                                                                                                                                                                                                                                                                                                                                                                                                                                                                                                                                                                                                                  | 2.12                                                                                         | 18                                                            | s            |                   |          |
|                                                                                                                                                                                                                                                                                                                                                                                                                                                                                                                                                                                                                                                                                                                                                                                                                                                                                                                                                                                                                                                                                                                                                                                                                                                                                                                                                                                                                                                                                                                                                                                                  | 6.39                                                                                         | 3                                                             | s            |                   |          |
| 6.64-6.59                                                                                                                                                                                                                                                                                                                                                                                                                                                                                                                                                                                                                                                                                                                                                                                                                                                                                                                                                                                                                                                                                                                                                                                                                                                                                                                                                                                                                                                                                                                                                                                        | 12                                                                                           | m                                                             |              |                   |          |
| <p><b><sup>13</sup>C NMR (100.6 MHz, CDCl<sub>3</sub>) δ:</b> 146.1, 143.8, 133.3, 131.7, 129.6, 126.5, 123.1, 34.0, 31.3, 21.0, 19.4. (One peak is missing due to boron quadrupolar relaxation)</p>                                                                                                                                                                                                                                                                                                                                                                                                                                                                                                                                                                                                                                                                                                                                                                                                                                                                                                                                                                                                                                                                                                                                                                                                                                                                                                                                                                                             |                                                                                              |                                                               |              |                   |          |
| <p><b><sup>11</sup>B NMR (128.4 MHz, CDCl<sub>3</sub>) δ:</b> 36.5</p>                                                                                                                                                                                                                                                                                                                                                                                                                                                                                                                                                                                                                                                                                                                                                                                                                                                                                                                                                                                                                                                                                                                                                                                                                                                                                                                                                                                                                                                                                                                           |                                                                                              |                                                               |              |                   |          |
| <p><b>Anal. Calcd.:</b> C, 82.48; H, 9.00; N, 4.81; <b>Found:</b> C, 82.31; H, 9.30; N, 4.76</p>                                                                                                                                                                                                                                                                                                                                                                                                                                                                                                                                                                                                                                                                                                                                                                                                                                                                                                                                                                                                                                                                                                                                                                                                                                                                                                                                                                                                                                                                                                 |                                                                                              |                                                               |              |                   |          |

|            |                                                                                          |
|------------|------------------------------------------------------------------------------------------|
| Chem. Name | <b>B,B',B''-Tris(2,4,6-trimethylphenyl)-N,N',N''-tris(4-isopropylphenyl)borazine (5)</b> |
|------------|------------------------------------------------------------------------------------------|

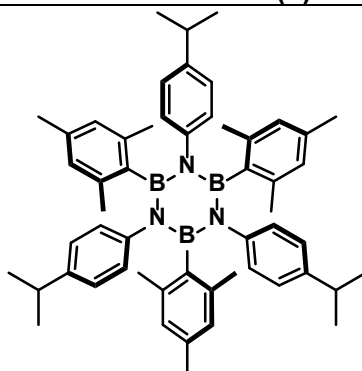

Molecular Weight: 789,57

**METHOD:**

To an oven-dried 50 mL Schlenk tube under dry argon atmosphere were added 6 mmol (820  $\mu$ L) of dry 4-isopropylaniline (distilled under vacuum from calcium hydride) followed by addition of 9 mL dry toluene. 1.25 eq (7.5 mL) of  $\text{BCl}_3$  1 M in heptane were dropwised slowly in this solution at  $0^\circ\text{C}$  under strong stirring. After 1h stirring the Schlenk was equipped with a condenser and a calcium chloride drying tube, the resulting solution was refluxed at  $110^\circ\text{C}$  for 20h, the Schlenk was then cooled to room temperature and subjected to 5 freeze-pump-thaw cycles to remove excess of HCl. The thus obtained chloroborazole intermediate was cannulated slowly in a stirred solution of aryllithium at  $0^\circ\text{C}$  and left to react for 20h. Aryllithium was prepared treating mesitylbromide 1.8 eq (10.8 mmol, 1.65 mL) dissolved in dry THF 18 mL with n-butyl lithium 3.1 eq (11.5 mL) 1.6 M in hexanes at  $-78^\circ\text{C}$  then gradually warming up to  $0^\circ\text{C}$ , the solution was kept stirring for 10 minutes before cannulating. The final product was added to a separatory funnel together with 50 mL DCM and extracted twice with 50 mL water then with 50 mL brine. Organic phase was dried over sodium sulfate then stripped of solvent under vacuum, dispersed in chloroform and crystallized with MeOH, product was filtered under vacuum and left to dry for 30 minutes affording pure product as a white solid **1.040 g 66%**.

| Mol Formula                                                                                                                                                                                                                           | $\text{C}_{54}\text{H}_{68}\text{B}_3\text{N}_3$ |       |       | m. p.      | 289 $^\circ\text{C}$ |
|---------------------------------------------------------------------------------------------------------------------------------------------------------------------------------------------------------------------------------------|--------------------------------------------------|-------|-------|------------|----------------------|
| <b><math>^1\text{H}</math> NMR (400 MHz, <math>\text{CDCl}_3</math>)</b>                                                                                                                                                              | $\delta$ Value                                   | No. H | Mult. | J Value/Hz |                      |
|                                                                                                                                                                                                                                       | 0.97-0.95                                        | 18    | d     | 6.84       |                      |
|                                                                                                                                                                                                                                       | 1.97                                             | 9     | s     |            |                      |
|                                                                                                                                                                                                                                       | 2.20                                             | 18    | s     |            |                      |
|                                                                                                                                                                                                                                       | 2.61-2.51                                        | 3     | m     |            |                      |
|                                                                                                                                                                                                                                       | 6.31                                             | 6     | s     |            |                      |
|                                                                                                                                                                                                                                       | 6.56-6.54                                        | 6     | d     | 8.40       |                      |
| 6.69-6.67                                                                                                                                                                                                                             | 6                                                | d     | 8.44  |            |                      |
| <b><math>^{13}\text{C}</math> NMR (100.6 MHz, <math>\text{CDCl}_3</math>) <math>\delta</math>:</b> 144.2, 144.1, 137.5, 135.7, 126.8, 126.0, 124.5, 33.3, 23.9, 23.1, 21.0. (One peak is missing due to boron quadrupolar relaxation) |                                                  |       |       |            |                      |
| <b><math>^{11}\text{B}</math> NMR (128.4 MHz, <math>\text{CDCl}_3</math>) <math>\delta</math>:</b> 37.2                                                                                                                               |                                                  |       |       |            |                      |
| <b>Anal. Calcd.:</b> C, 82.14; H, 8.43; N, 5.32; <b>Found:</b> C, 82.31; H, 8.33; N, 5.28                                                                                                                                             |                                                  |       |       |            |                      |

| Chem. Name                                                                                                                                                                                                                                                                                                                                                                                                                                                                                                                                                                                                                                                                                                                                                                                                                                                                                                                                                                                                                                                                                                                                                                                                                                                                                                                                                                                                                                                  | B,B',B''-Tris(2,4,6-trimethylphenyl)-N,N',N''-tris(phenyl)borazine (6) |                                                               |              |                   |        |
|-------------------------------------------------------------------------------------------------------------------------------------------------------------------------------------------------------------------------------------------------------------------------------------------------------------------------------------------------------------------------------------------------------------------------------------------------------------------------------------------------------------------------------------------------------------------------------------------------------------------------------------------------------------------------------------------------------------------------------------------------------------------------------------------------------------------------------------------------------------------------------------------------------------------------------------------------------------------------------------------------------------------------------------------------------------------------------------------------------------------------------------------------------------------------------------------------------------------------------------------------------------------------------------------------------------------------------------------------------------------------------------------------------------------------------------------------------------|------------------------------------------------------------------------|---------------------------------------------------------------|--------------|-------------------|--------|
| 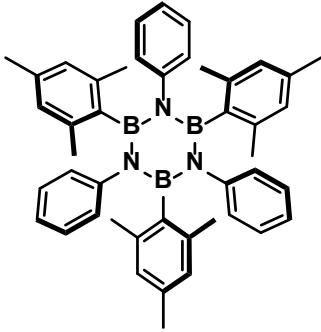 <p>Molecular Weight: 663,33</p>                                                                                                                                                                                                                                                                                                                                                                                                                                                                                                                                                                                                                                                                                                                                                                                                                                                                                                                                                                                                                                                                                                                                                                                                                                                                                                                                           |                                                                        |                                                               |              |                   |        |
| <b>METHOD:</b>                                                                                                                                                                                                                                                                                                                                                                                                                                                                                                                                                                                                                                                                                                                                                                                                                                                                                                                                                                                                                                                                                                                                                                                                                                                                                                                                                                                                                                              |                                                                        |                                                               |              |                   |        |
| <p>To an oven-dried 50 mL Schlenk tube under dry argon atmosphere were added 6 mmol (542 <math>\mu</math>L) of dry aniline (distilled under vacuum from calcium hydride) followed by addition of 10 mL dry toluene. 1.25 eq (7.5 mL) of BCl<sub>3</sub> 1 M in heptane were dropwisely slowly in this solution at 0°C under strong stirring. After 1h stirring the Schlenk was equipped with a condenser and a calcium chloride drying tube, the resulting solution was refluxed at 110°C for 20h, the Schlenk was then cooled to room temperature and subjected to 5 freeze-pump-thaw cycles to remove excess of HCl. The thus obtained chloroborazole intermediate was cannulated slowly in a stirred solution of aryllithium at 0°C and left to react for 20h. Aryllithium was prepared treating mesitylbromide 1.8 eq (10.8 mmol, 1.65 mL) dissolved in dry THF 18 mL with n-butyl lithium 3.1 eq (11.5 mL) 1.6 M in hexanes at -78°C then gradually warming up to 0°C, the solution was kept stirring for 10 minutes before cannulating. The final product was added to a separatory funnel together with 50 mL DCM and extracted twice with 50 mL water then with 50 mL brine. Organic phase was dried over sodium sulfate then stripped of solvent under vacuum, dispersed in chloroform and crystallized with MeOH, product was filtered under vacuum and left to dry for 30 minutes affording pure product as a white solid <b>572 mg 43%</b>.</p> |                                                                        |                                                               |              |                   |        |
| <b>Mol Formula</b>                                                                                                                                                                                                                                                                                                                                                                                                                                                                                                                                                                                                                                                                                                                                                                                                                                                                                                                                                                                                                                                                                                                                                                                                                                                                                                                                                                                                                                          |                                                                        | C <sub>45</sub> H <sub>48</sub> B <sub>3</sub> N <sub>3</sub> |              | <b>m. p.</b>      | 288 °C |
| <b><sup>1</sup>H NMR<br/>(400 MHz,<br/>CDCl<sub>3</sub>)</b>                                                                                                                                                                                                                                                                                                                                                                                                                                                                                                                                                                                                                                                                                                                                                                                                                                                                                                                                                                                                                                                                                                                                                                                                                                                                                                                                                                                                | <b><math>\delta</math> Value</b>                                       | <b>No. H</b>                                                  | <b>Mult.</b> | <b>J Value/Hz</b> |        |
|                                                                                                                                                                                                                                                                                                                                                                                                                                                                                                                                                                                                                                                                                                                                                                                                                                                                                                                                                                                                                                                                                                                                                                                                                                                                                                                                                                                                                                                             | 1.97                                                                   | 9                                                             | s            |                   |        |
|                                                                                                                                                                                                                                                                                                                                                                                                                                                                                                                                                                                                                                                                                                                                                                                                                                                                                                                                                                                                                                                                                                                                                                                                                                                                                                                                                                                                                                                             | 2.23                                                                   | 18                                                            | s            |                   |        |
|                                                                                                                                                                                                                                                                                                                                                                                                                                                                                                                                                                                                                                                                                                                                                                                                                                                                                                                                                                                                                                                                                                                                                                                                                                                                                                                                                                                                                                                             | 6.33                                                                   | 6                                                             | s            |                   |        |
|                                                                                                                                                                                                                                                                                                                                                                                                                                                                                                                                                                                                                                                                                                                                                                                                                                                                                                                                                                                                                                                                                                                                                                                                                                                                                                                                                                                                                                                             | 6.70-6.83                                                              | 15                                                            | m            |                   |        |
| <p><b><sup>13</sup>C NMR (100.6 MHz, CDCl<sub>3</sub>) <math>\delta</math>:</b> 146.4, 137.4, 136.2, 127.1, 126.8, 126.3, 124.3, 23.1, 21.2.<br/>(One peak is missing due to boron quadrupolar relaxation)</p>                                                                                                                                                                                                                                                                                                                                                                                                                                                                                                                                                                                                                                                                                                                                                                                                                                                                                                                                                                                                                                                                                                                                                                                                                                              |                                                                        |                                                               |              |                   |        |
| <p><b><sup>11</sup>B NMR (128.4 MHz, CDCl<sub>3</sub>) <math>\delta</math>:</b> 36.9</p>                                                                                                                                                                                                                                                                                                                                                                                                                                                                                                                                                                                                                                                                                                                                                                                                                                                                                                                                                                                                                                                                                                                                                                                                                                                                                                                                                                    |                                                                        |                                                               |              |                   |        |
| <p><b>Anal. Calcd.:</b> C, 81.48; H, 7.29; N, 6.33; <b>Found:</b> C, 81.32; H, 7.42; N, 6.44</p>                                                                                                                                                                                                                                                                                                                                                                                                                                                                                                                                                                                                                                                                                                                                                                                                                                                                                                                                                                                                                                                                                                                                                                                                                                                                                                                                                            |                                                                        |                                                               |              |                   |        |

|            |                                                                                          |
|------------|------------------------------------------------------------------------------------------|
| Chem. Name | <b>B,B',B''-Tris(2,6-dimethylphenyl)-N,N',N''-tris(4-isopropylphenyl)borazine</b><br>(7) |
|------------|------------------------------------------------------------------------------------------|

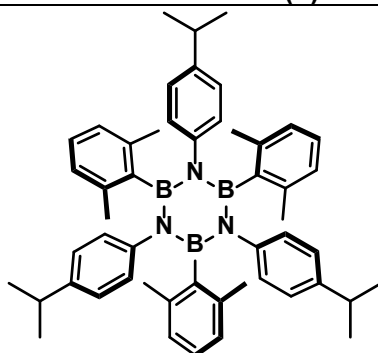

Molecular Weight: 747,49

**METHOD:**

To an oven-dried 50 mL Schlenk tube under dry argon atmosphere were added 6 mmol (820  $\mu$ L) of dry 4-isopropylaniline (distilled under vacuum from calcium hydride) followed by addition of 9 mL dry toluene. 1.25 eq (7.5 mL) of  $\text{BCl}_3$  1 M in heptane were dropwised slowly in this solution at  $0^\circ\text{C}$  under strong stirring. After 1h stirring the Schlenk was equipped with a condenser and a calcium chloride drying tube, the resulting solution was refluxed at  $110^\circ\text{C}$  for 20h, the Schlenk was then cooled to room temperature and subjected to 5 freeze-pump-thaw cycles to remove excess of HCl. The thus obtained chloroborazole intermediate was cannulated slowly in a stirred solution of aryllithium at  $0^\circ\text{C}$  and left to react for 20h. Aryllithium was prepared treating Bromoxylene 1.8 eq (10.8 mmol, 1.44 mL) dissolved in dry THF 18 mL with n-butyl lithium 3.1 eq (11.5 mL) 1.6 M in hexanes at  $-78^\circ\text{C}$  then gradually warming up to  $0^\circ\text{C}$ , the solution was kept stirring for 10 minutes before cannulating. The final product was added to a separatory funnel together with 50 mL DCM and extracted twice with 50 mL water then with 50 mL brine. Organic phase was dried over sodium sulfate then stripped of solvent under vacuum, dispersed in 2 mL chloroform and crystallized with MeOH, product was filtered under vacuum and left to dry for 30 minutes affording pure product as a white solid **1.078 g 72%**.

| Mol Formula                                                                                                                                                                                                                     |                                  | $\text{C}_{51}\text{H}_{60}\text{B}_3\text{N}_3$ |              | m. p.             | 272 $^\circ\text{C}$ |
|---------------------------------------------------------------------------------------------------------------------------------------------------------------------------------------------------------------------------------|----------------------------------|--------------------------------------------------|--------------|-------------------|----------------------|
| <b><math>^1\text{H}</math> NMR</b><br>(400 MHz,<br>$\text{CDCl}_3$ )                                                                                                                                                            | <b><math>\delta</math> Value</b> | <b>No. H</b>                                     | <b>Mult.</b> | <b>J Value/Hz</b> |                      |
|                                                                                                                                                                                                                                 | 0.96-0.94                        | 18                                               | d            | 6.96              |                      |
|                                                                                                                                                                                                                                 | 2.26                             | 18                                               | s            |                   |                      |
|                                                                                                                                                                                                                                 | 2.58-2.26                        | 3                                                | m            |                   |                      |
|                                                                                                                                                                                                                                 | 6.51-6.49                        | 6                                                | d            | 7.56              |                      |
|                                                                                                                                                                                                                                 | 6.56-6.54                        | 6                                                | d            | 8.44              |                      |
|                                                                                                                                                                                                                                 | 6.71-6.67                        | 9                                                | m            |                   |                      |
| <b><math>^{13}\text{C}</math> NMR (100.6 MHz, <math>\text{CDCl}_3</math>) <math>\delta</math>:</b> 144.5, 143.7, 137.6, 126.7, 126.7, 125.2, 124.5, 33.2, 23.9, 23.3. (One peak is missing due to boron quadrupolar relaxation) |                                  |                                                  |              |                   |                      |
| <b><math>^{11}\text{B}</math> NMR (128.4 MHz, <math>\text{CDCl}_3</math>) <math>\delta</math>:</b> 36.9                                                                                                                         |                                  |                                                  |              |                   |                      |
| <b>Anal. Calcd.:</b> C, 81.95; H, 8.09; N, 5.62; <b>Found:</b> C, 81.56; H, 8.30; N, 5.75                                                                                                                                       |                                  |                                                  |              |                   |                      |

| Chem. Name                                                                                                                                                                                                                                                                                                                                                                                                                                                                                                                                                                                                                                                                                                                                                                                                                                                                                                                                                                                                                                                                                                                                                                                                                                                                                                                                                                                                                                                                                                                                                                                                                                                                                                  | <b>B,B',B''-Tris(4-((tert-butyl)dimethylsilyloxy)-2,6-dimethylphenyl)-N,N',N''-tris(3,5-dimethylphenyl)borazine (8)</b> |                                                                       |              |                      |
|-------------------------------------------------------------------------------------------------------------------------------------------------------------------------------------------------------------------------------------------------------------------------------------------------------------------------------------------------------------------------------------------------------------------------------------------------------------------------------------------------------------------------------------------------------------------------------------------------------------------------------------------------------------------------------------------------------------------------------------------------------------------------------------------------------------------------------------------------------------------------------------------------------------------------------------------------------------------------------------------------------------------------------------------------------------------------------------------------------------------------------------------------------------------------------------------------------------------------------------------------------------------------------------------------------------------------------------------------------------------------------------------------------------------------------------------------------------------------------------------------------------------------------------------------------------------------------------------------------------------------------------------------------------------------------------------------------------|-------------------------------------------------------------------------------------------------------------------------|-----------------------------------------------------------------------|--------------|----------------------|
| 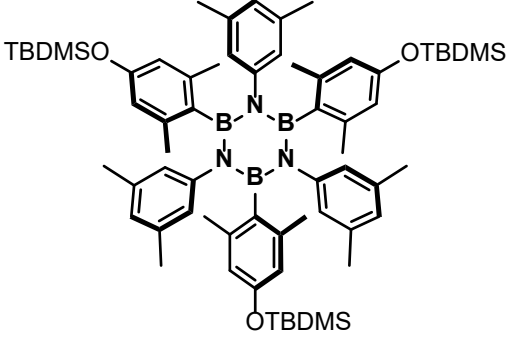 <p data-bbox="646 667 949 698">Molecular Weight: 1096,20</p>                                                                                                                                                                                                                                                                                                                                                                                                                                                                                                                                                                                                                                                                                                                                                                                                                                                                                                                                                                                                                                                                                                                                                                                                                                                                                                                                                                                                                                                                                                                                                             |                                                                                                                         |                                                                       |              |                      |
| <b>METHOD:</b>                                                                                                                                                                                                                                                                                                                                                                                                                                                                                                                                                                                                                                                                                                                                                                                                                                                                                                                                                                                                                                                                                                                                                                                                                                                                                                                                                                                                                                                                                                                                                                                                                                                                                              |                                                                                                                         |                                                                       |              |                      |
| <p>To an oven-dried 50 mL Schlenk tube under dry argon atmosphere were added 6 mmol (748 <math>\mu</math>L) of dry 3,5-dimethylaniline (distilled under vacuum from calcium hydride) followed by addition of 14 mL dry toluene. 1.25 eq (7.5 mL) of <math>\text{BCl}_3</math> 1 M in heptane were dropwisely slowly in this solution at <math>0^\circ\text{C}</math> under strong stirring. After 1h stirring the Schlenk was equipped with a condenser and a calcium chloride drying tube, the resulting solution was refluxed at <math>110^\circ\text{C}</math> for 20h, the Schlenk was then cooled to room temperature and subjected to 5 freeze-pump-thaw cycles to remove excess of HCl. The thus obtained chloroborazole intermediate was diluted with 8 mL of dry THF and 6 mL of dry toluene as cosolvent then cannulated slowly in a stirred solution of aryllithium at <math>0^\circ\text{C}</math> and left to react for 20h.</p> <p>Aryllithium was prepared treating (4-bromo-3,5-dimethylphenoxy)(tert-butyl)dimethylsilane 1.2 eq (7.2 mmol, 2.15 g) dissolved in dry THF 20 mL with t-butyl lithium 2.4 eq (8.5 mL) 1.7 M in pentane at <math>-78^\circ\text{C}</math> then gradually warming up to <math>0^\circ\text{C}</math>, the solution was kept stirring for 10 minutes before cannulating. The final product was added to a separatory funnel together with 50 mL DCM and extracted twice with 50 mL water then with 50 mL brine. Organic phase was dried over sodium sulfate then stripped of solvent under vacuum and crystallized with MeOH, product was filtered under vacuum and left to dry for 30 minutes affording pure product as a white solid <b>1.293 mg 59%</b>.</p> |                                                                                                                         |                                                                       |              |                      |
| <b>Mol Formula</b>                                                                                                                                                                                                                                                                                                                                                                                                                                                                                                                                                                                                                                                                                                                                                                                                                                                                                                                                                                                                                                                                                                                                                                                                                                                                                                                                                                                                                                                                                                                                                                                                                                                                                          |                                                                                                                         | $\text{C}_{66}\text{H}_{96}\text{B}_3\text{N}_3\text{O}_3\text{Si}_3$ |              | <b>m. p.</b>         |
|                                                                                                                                                                                                                                                                                                                                                                                                                                                                                                                                                                                                                                                                                                                                                                                                                                                                                                                                                                                                                                                                                                                                                                                                                                                                                                                                                                                                                                                                                                                                                                                                                                                                                                             |                                                                                                                         |                                                                       |              | 288 $^\circ\text{C}$ |
| <b><math>^1\text{H}</math> NMR<br/>(400 MHz,<br/><math>\text{CDCl}_3</math>)</b>                                                                                                                                                                                                                                                                                                                                                                                                                                                                                                                                                                                                                                                                                                                                                                                                                                                                                                                                                                                                                                                                                                                                                                                                                                                                                                                                                                                                                                                                                                                                                                                                                            | <b><math>\delta</math> Value</b>                                                                                        | <b>No. H</b>                                                          | <b>Mult.</b> | <b>J Value/Hz</b>    |
|                                                                                                                                                                                                                                                                                                                                                                                                                                                                                                                                                                                                                                                                                                                                                                                                                                                                                                                                                                                                                                                                                                                                                                                                                                                                                                                                                                                                                                                                                                                                                                                                                                                                                                             | -0.04                                                                                                                   | 18                                                                    | s            |                      |
|                                                                                                                                                                                                                                                                                                                                                                                                                                                                                                                                                                                                                                                                                                                                                                                                                                                                                                                                                                                                                                                                                                                                                                                                                                                                                                                                                                                                                                                                                                                                                                                                                                                                                                             | 0.84                                                                                                                    | 27                                                                    | s            |                      |
|                                                                                                                                                                                                                                                                                                                                                                                                                                                                                                                                                                                                                                                                                                                                                                                                                                                                                                                                                                                                                                                                                                                                                                                                                                                                                                                                                                                                                                                                                                                                                                                                                                                                                                             | 1.91                                                                                                                    | 18                                                                    | s            |                      |
|                                                                                                                                                                                                                                                                                                                                                                                                                                                                                                                                                                                                                                                                                                                                                                                                                                                                                                                                                                                                                                                                                                                                                                                                                                                                                                                                                                                                                                                                                                                                                                                                                                                                                                             | 2.20                                                                                                                    | 18                                                                    | s            |                      |
|                                                                                                                                                                                                                                                                                                                                                                                                                                                                                                                                                                                                                                                                                                                                                                                                                                                                                                                                                                                                                                                                                                                                                                                                                                                                                                                                                                                                                                                                                                                                                                                                                                                                                                             | 6.05                                                                                                                    | 6                                                                     | s            |                      |
|                                                                                                                                                                                                                                                                                                                                                                                                                                                                                                                                                                                                                                                                                                                                                                                                                                                                                                                                                                                                                                                                                                                                                                                                                                                                                                                                                                                                                                                                                                                                                                                                                                                                                                             | 6.27                                                                                                                    | 3                                                                     | s            |                      |
|                                                                                                                                                                                                                                                                                                                                                                                                                                                                                                                                                                                                                                                                                                                                                                                                                                                                                                                                                                                                                                                                                                                                                                                                                                                                                                                                                                                                                                                                                                                                                                                                                                                                                                             |                                                                                                                         |                                                                       |              |                      |
| $^{13}\text{C}$ NMR (100.6 MHz, $\text{CDCl}_3$ ) $\delta$ : 154.3, 146.3, 138.9, 135.7, 125.7, 124.9, 117.4, 25.9, 23.3, 21.0, 18.3, -4.5. (One peak is missing due to boron quadrupolar relaxation)                                                                                                                                                                                                                                                                                                                                                                                                                                                                                                                                                                                                                                                                                                                                                                                                                                                                                                                                                                                                                                                                                                                                                                                                                                                                                                                                                                                                                                                                                                       |                                                                                                                         |                                                                       |              |                      |
| $^{11}\text{B}$ NMR (128.4 MHz, $\text{CDCl}_3$ ) $\delta$ : 37.2                                                                                                                                                                                                                                                                                                                                                                                                                                                                                                                                                                                                                                                                                                                                                                                                                                                                                                                                                                                                                                                                                                                                                                                                                                                                                                                                                                                                                                                                                                                                                                                                                                           |                                                                                                                         |                                                                       |              |                      |
| <b>Anal. Calcd.:</b> C, 72.32; H, 8.83; N, 3.83; <b>Found:</b> C, 72.41; H, 8.56; N, 3.75;                                                                                                                                                                                                                                                                                                                                                                                                                                                                                                                                                                                                                                                                                                                                                                                                                                                                                                                                                                                                                                                                                                                                                                                                                                                                                                                                                                                                                                                                                                                                                                                                                  |                                                                                                                         |                                                                       |              |                      |



|                                                                                                                                                                                                                                                                                                                                                                                                                                                                                                                                                                                                                                                                                                                                                                                                                                                                                                                                                                                                                                                |                                                                                                  |                               |              |
|------------------------------------------------------------------------------------------------------------------------------------------------------------------------------------------------------------------------------------------------------------------------------------------------------------------------------------------------------------------------------------------------------------------------------------------------------------------------------------------------------------------------------------------------------------------------------------------------------------------------------------------------------------------------------------------------------------------------------------------------------------------------------------------------------------------------------------------------------------------------------------------------------------------------------------------------------------------------------------------------------------------------------------------------|--------------------------------------------------------------------------------------------------|-------------------------------|--------------|
| <b>Chem. Name</b>                                                                                                                                                                                                                                                                                                                                                                                                                                                                                                                                                                                                                                                                                                                                                                                                                                                                                                                                                                                                                              | <b>B,B',B''-Tris(4-triflyl-2,6-dimethylphenyl)-N,N',N''-tris(3,5-dimethylphenyl)borazine (9)</b> |                               |              |
| 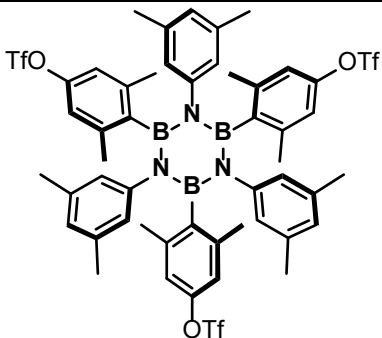 <p>Molecular Weight: 1149,58</p>                                                                                                                                                                                                                                                                                                                                                                                                                                                                                                                                                                                                                                                                                                                                                                                                                                                                                                                             |                                                                                                  |                               |              |
| <b>METHOD:</b>                                                                                                                                                                                                                                                                                                                                                                                                                                                                                                                                                                                                                                                                                                                                                                                                                                                                                                                                                                                                                                 |                                                                                                  |                               |              |
| <p>Borazine <b>8</b> 1.146 g was dissolved in 22 mL anhydrous THF in an oven-dried argon-purged 100 mL round bottom flask. Under inert atmosphere at 0°C 3.75 mL of TBAF solution 1M in THF were dropwise added and the solution left stirring for 2h. The free OH borazine was filtered under vacuum, washed two times with 10 mL THF and left to dry under vacuum for several hours.</p> <p>In a second oven-dried flask under inert argon atmosphere the free OH borazine was added followed by 20 mL of dry pyridine and the flask cooled to 0°C, 1.64 mL of Trifluoromethanesulfonic anhydride were added dropwise and the solution was left stirring for 16h at room temperature. The mixture was then diluted with 70 mL of EtOAc and washed with HCl 0.5M 3x200 mL, 100 mL Water and 100 mL brine. Organics were dried over sodium sulphate and concentrated under vacuum, the residue was then subjected to column chromatography over silica gel (PET/EtOAc 9:1) affording borazine <b>9</b> as a white powder <b>901 mg 75%</b></p> |                                                                                                  |                               |              |
| <b>Mol Formula</b>                                                                                                                                                                                                                                                                                                                                                                                                                                                                                                                                                                                                                                                                                                                                                                                                                                                                                                                                                                                                                             |                                                                                                  | $C_{51}H_{51}B_3F_9N_3O_9S_3$ | <b>m. p.</b> |
|                                                                                                                                                                                                                                                                                                                                                                                                                                                                                                                                                                                                                                                                                                                                                                                                                                                                                                                                                                                                                                                |                                                                                                  |                               | 234 °C       |
| <b><sup>1</sup>H NMR (400 MHz, CDCl<sub>3</sub>)</b>                                                                                                                                                                                                                                                                                                                                                                                                                                                                                                                                                                                                                                                                                                                                                                                                                                                                                                                                                                                           | <b>δ Value</b>                                                                                   | <b>No. H</b>                  | <b>Mult.</b> |
|                                                                                                                                                                                                                                                                                                                                                                                                                                                                                                                                                                                                                                                                                                                                                                                                                                                                                                                                                                                                                                                | 1.92                                                                                             | 18                            | s            |
|                                                                                                                                                                                                                                                                                                                                                                                                                                                                                                                                                                                                                                                                                                                                                                                                                                                                                                                                                                                                                                                | 2.29                                                                                             | 18                            | s            |
|                                                                                                                                                                                                                                                                                                                                                                                                                                                                                                                                                                                                                                                                                                                                                                                                                                                                                                                                                                                                                                                | 6.32                                                                                             | 6                             | s            |
|                                                                                                                                                                                                                                                                                                                                                                                                                                                                                                                                                                                                                                                                                                                                                                                                                                                                                                                                                                                                                                                | 6.40                                                                                             | 3                             | s            |
|                                                                                                                                                                                                                                                                                                                                                                                                                                                                                                                                                                                                                                                                                                                                                                                                                                                                                                                                                                                                                                                | 6.51                                                                                             | 6                             | s            |
| <b><sup>13</sup>C NMR (100.6 MHz, CDCl<sub>3</sub>) δ:</b> 149.1, 144.6, 140.4, 136.7, 126.7, 120.3, 117.9, 124.5-114.0 (CF <sub>3</sub> ), 23.2, 20.8. (One peak is missing due to boron quadrupolar relaxation)                                                                                                                                                                                                                                                                                                                                                                                                                                                                                                                                                                                                                                                                                                                                                                                                                              |                                                                                                  |                               |              |
| <b><sup>11</sup>B NMR (128.4 MHz, CDCl<sub>3</sub>) δ:</b> 35.2                                                                                                                                                                                                                                                                                                                                                                                                                                                                                                                                                                                                                                                                                                                                                                                                                                                                                                                                                                                |                                                                                                  |                               |              |
| <b><sup>19</sup>F NMR (376 MHz, CDCl<sub>3</sub>) δ:</b> -73.01                                                                                                                                                                                                                                                                                                                                                                                                                                                                                                                                                                                                                                                                                                                                                                                                                                                                                                                                                                                |                                                                                                  |                               |              |
| <b>Anal. Calcd.:</b> C, 53.29; H, 4.47; N, 3.66; S, 8.37; <b>Found:</b> C, 53.16; H, 4.61; N, 3.72; S, 8.62                                                                                                                                                                                                                                                                                                                                                                                                                                                                                                                                                                                                                                                                                                                                                                                                                                                                                                                                    |                                                                                                  |                               |              |

|            |                                                                             |
|------------|-----------------------------------------------------------------------------|
| Chem. Name | <b>B,B',B''-Tris(2,6-difluorophenyl)-N,N',N''-tris(phenyl)borazine (10)</b> |
|------------|-----------------------------------------------------------------------------|

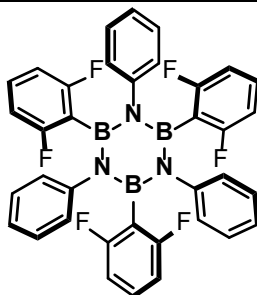

Molecular Weight: 645,03

**METHOD:**

To an oven-dried 50 mL Schlenk tube under dry argon atmosphere were added 5 mmol (452  $\mu$ L) of dry aniline (distilled under vacuum from calcium hydride) followed by addition of 9 mL dry toluene. 1.25 eq (6.25 mL) of  $\text{BCl}_3$  1 M in heptane were dropwisely slowly in this solution at  $0^\circ\text{C}$  under strong stirring. After 1h stirring the Schlenk was equipped with a condenser and a calcium chloride drying tube, the resulting solution was refluxed at  $110^\circ\text{C}$  for 20h, the Schlenk was then cooled to room temperature and subjected to 8 freeze-pump-thaw cycles to remove excess of HCl. The thus obtained chloroborazole intermediate was diluted with 8 mL of dry THF as cosolvent then cannulated slowly in a stirred solution of aryllithium and left to react for 20h.

Aryllithium was prepared treating (2-Bromo-1,3-difluorobenzene 1.1 eq (5.5 mmol, 620  $\mu$ L) dissolved in dry THF 4 mL with n-butyl lithium 1.32 eq (4.13 mL) 1.6 M in hexanes at  $-84^\circ\text{C}$ , the solution was kept stirring for 10 minutes before cannulating, then left stirring at  $-84^\circ\text{C}$  for 3 hours, then warmed to  $0^\circ\text{C}$  and stirred for further 3 hours before leaving the reaction to stir overnight at room temperature. The final product was quenched by stirring with 10 mL water, added to a separatory funnel together with 80 mL DCM and extracted twice with 50 mL water then with 50 mL brine. Organic phase was dried over sodium sulfate then stripped of solvent under vacuum, dispersed in chloroform and crystallized with MeOH, product was filtered under vacuum and left to dry for 30 minutes affording pure product as a white solid **223 mg 20.7%**.

| Mol Formula                                                                                                                                                                                                                      |                                  | $\text{C}_{36}\text{H}_{24}\text{B}_3\text{F}_6\text{N}_3$ |              | m. p.             | $>300^\circ\text{C}$ |
|----------------------------------------------------------------------------------------------------------------------------------------------------------------------------------------------------------------------------------|----------------------------------|------------------------------------------------------------|--------------|-------------------|----------------------|
| <b><math>^1\text{H}</math> NMR<br/>(400 MHz,<br/><math>\text{CDCl}_3</math>)</b>                                                                                                                                                 | <b><math>\delta</math> Value</b> | <b>No. H</b>                                               | <b>Mult.</b> | <b>J Value/Hz</b> |                      |
|                                                                                                                                                                                                                                  | 6.40-6.36                        | 6                                                          | m            |                   |                      |
|                                                                                                                                                                                                                                  | 6.93-6.79                        | 12                                                         | m            |                   |                      |
|                                                                                                                                                                                                                                  | 7.10-7.08                        | 6                                                          | m            |                   |                      |
| <b><math>^{13}\text{C}</math> NMR (100.6 MHz, <math>\text{CDCl}_3</math>) <math>\delta</math>: 163.9-161.3, 145.75, 130.7-130.5, 127.9, 127.0, 125.5, 109.9-109.7. (One peak is missing due to boron quadrupolar relaxation)</b> |                                  |                                                            |              |                   |                      |
| <b><math>^{11}\text{B}</math> NMR (128.4 MHz, <math>\text{CDCl}_3</math>) <math>\delta</math>: 34.1</b>                                                                                                                          |                                  |                                                            |              |                   |                      |
| <b><math>^{19}\text{F}</math> NMR (376 MHz, <math>\text{CDCl}_3</math>) <math>\delta</math>: -101.4</b>                                                                                                                          |                                  |                                                            |              |                   |                      |
| <b>Anal. Calcd.:</b> C, 67.04; H, 3.75; N, 6.51 <b>Found:</b> C, 66.93; H, 3.80; N, 6.41                                                                                                                                         |                                  |                                                            |              |                   |                      |

| Chem. Name                                                                                                                                                                                                                                                                                                                                                                                                                                                                                                                 | B,B',B''-Tris(4-(tertbutyl)-2,6-dimethylphenyl)-N,N',N''-tris(4-iodo-3,5-dimethylphenyl)borazine ( <b>11</b> ) |                                                                              |              |                   |
|----------------------------------------------------------------------------------------------------------------------------------------------------------------------------------------------------------------------------------------------------------------------------------------------------------------------------------------------------------------------------------------------------------------------------------------------------------------------------------------------------------------------------|----------------------------------------------------------------------------------------------------------------|------------------------------------------------------------------------------|--------------|-------------------|
| <div style="display: flex; align-items: center; justify-content: center;"> <div style="text-align: center;"> 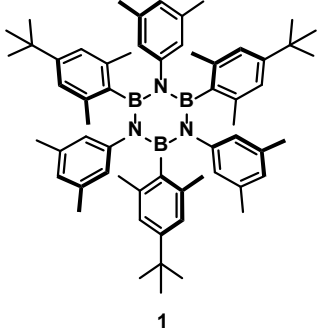 <p><b>1</b></p> </div> <div style="margin: 0 20px; text-align: center;"> <p>NIS 3 eq<br/>TsOH 3 eq<br/>1h, 30Hz, R.T.</p> <p>→</p> </div> <div style="text-align: center;">  <p>Molecular Weight: 1251,42<br/><b>11</b></p> </div> </div> |                                                                                                                |                                                                              |              |                   |
| <p><b>METHOD:</b><br/>Ball miller jar was loaded with borazine <b>1</b> (0.08 mmol, 69.9 mg), NIS 3 eq (0.24 mmol, 54 mg), TsOH 3 eq (0.24 mmol, 45.6 mg) and a single zirconium oxide ball. The mixture was milled for 1h. The resulting powder was scraped from the jar, the jar was washed thoroughly with MeOH and the resulting suspension was added to the scraped powder. The suspension in MeOH was sonicated for 10 minutes then filtered to recover product <b>11</b>, <b>90% 90 mg</b> as a white powder.</p>   |                                                                                                                |                                                                              |              |                   |
| <b>Mol Formula</b>                                                                                                                                                                                                                                                                                                                                                                                                                                                                                                         |                                                                                                                | C <sub>60</sub> H <sub>75</sub> B <sub>3</sub> I <sub>3</sub> N <sub>3</sub> |              | <b>m. p.</b>      |
| <b><sup>1</sup>H NMR<br/>(400 MHz,<br/>CDCl<sub>3</sub>)</b>                                                                                                                                                                                                                                                                                                                                                                                                                                                               |                                                                                                                | <b>δ Value</b>                                                               | <b>No. H</b> | <b>J Value/Hz</b> |
|                                                                                                                                                                                                                                                                                                                                                                                                                                                                                                                            |                                                                                                                | 1.10                                                                         | 27           | s                 |
|                                                                                                                                                                                                                                                                                                                                                                                                                                                                                                                            |                                                                                                                | 2.02                                                                         | 18           | s                 |
|                                                                                                                                                                                                                                                                                                                                                                                                                                                                                                                            |                                                                                                                | 2.16                                                                         | 18           | s                 |
|                                                                                                                                                                                                                                                                                                                                                                                                                                                                                                                            |                                                                                                                | 6.42                                                                         | 6            | s                 |
| 6.54                                                                                                                                                                                                                                                                                                                                                                                                                                                                                                                       | 6                                                                                                              | s                                                                            | > 300 °C     |                   |
| <p><b><sup>13</sup>C NMR (100.6 MHz, CDCl<sub>3</sub>) δ:</b> 150.0, 145.6, 139.6, 137.1, 126.2, 122.5, 102.5, 34.1, 31.3, 29.0, 23.3. (One peak is missing due to boron quadrupolar relaxation)</p>                                                                                                                                                                                                                                                                                                                       |                                                                                                                |                                                                              |              |                   |
| <p><b><sup>11</sup>B NMR (128.4 MHz, CDCl<sub>3</sub>) δ:</b> 36.8</p>                                                                                                                                                                                                                                                                                                                                                                                                                                                     |                                                                                                                |                                                                              |              |                   |
| <p><b>Anal. Calcd.:</b> C, 57.59; H, 6.04; N, 3.36 <b>Found:</b> C, 57.35; H, 5.97; N, 3.41</p>                                                                                                                                                                                                                                                                                                                                                                                                                            |                                                                                                                |                                                                              |              |                   |

| Chem. Name                                                                                                                                                                                                                                                                                                                                                                                                                                                                                            | <b>B,B',B''-Tris(3-iodo-2,6-dimethylphenyl)-N,N',N''-tris(4-tbutylphenyl)borazine (12)</b> |                         |              |                   |
|-------------------------------------------------------------------------------------------------------------------------------------------------------------------------------------------------------------------------------------------------------------------------------------------------------------------------------------------------------------------------------------------------------------------------------------------------------------------------------------------------------|--------------------------------------------------------------------------------------------|-------------------------|--------------|-------------------|
| <p style="text-align: center;">2</p> <p style="text-align: center;">cis</p> <p style="text-align: center;">trans</p> <p style="text-align: right;">Molecular Weight: 1167,26<br/>12</p>                                                                                                                                                                                                                                                                                                               |                                                                                            |                         |              |                   |
| <b>METHOD:</b>                                                                                                                                                                                                                                                                                                                                                                                                                                                                                        |                                                                                            |                         |              |                   |
| <p>Ball miller jar was loaded with borazine <b>2</b> (0.08 mmol, 63.2 mg), NIS 3 eq (0.24 mmol, 54 mg), TsOH 3 eq (0.24 mmol, 45.6 mg) and a single zirconium oxide ball. The mixture was milled for 1h. The resulting powder was scraped from the jar, the jar was washed thoroughly with MeOH and the resulting suspension was added to the scraped powder. The suspension in MeOH was sonicated for 10 minutes then filtered to recover product <b>12</b>, <b>76% 71 mg</b> as a white powder.</p> |                                                                                            |                         |              |                   |
| <b>Mol Formula</b>                                                                                                                                                                                                                                                                                                                                                                                                                                                                                    |                                                                                            | $C_{54}H_{63}B_3I_3N_3$ |              | <b>m. p.</b>      |
|                                                                                                                                                                                                                                                                                                                                                                                                                                                                                                       |                                                                                            |                         |              | > 300 °C          |
| <b><sup>1</sup>H NMR</b><br><b>(400 MHz,</b><br><b>CDCl<sub>3</sub>)</b>                                                                                                                                                                                                                                                                                                                                                                                                                              | <b>δ Value</b>                                                                             | <b>No. H</b>            | <b>Mult.</b> | <b>J Value/Hz</b> |
|                                                                                                                                                                                                                                                                                                                                                                                                                                                                                                       | 1.06-1.07                                                                                  | 27                      | m            |                   |
|                                                                                                                                                                                                                                                                                                                                                                                                                                                                                                       | 2.21-2.25                                                                                  | 9                       | m            |                   |
|                                                                                                                                                                                                                                                                                                                                                                                                                                                                                                       | 2.29-2.35                                                                                  | 9                       | m            |                   |
|                                                                                                                                                                                                                                                                                                                                                                                                                                                                                                       | 6.22-6.27                                                                                  | 3                       | m            |                   |
|                                                                                                                                                                                                                                                                                                                                                                                                                                                                                                       | 6.57-6.81                                                                                  | 12                      | m            |                   |
|                                                                                                                                                                                                                                                                                                                                                                                                                                                                                                       | 7.21-7.24                                                                                  | 3                       | m            |                   |
| <p><b><sup>13</sup>C NMR (100.6 MHz, CDCl<sub>3</sub>) δ:</b> 147.5, 142.6, 140.0-139.8, 138.0, 137.6, 127.8, 126.2-126.0, 123.9-123.8, 97.9, 34.2, 31.3, 30.6-30.5, 22.7. (One peak is missing due to boron quadrupolar relaxation)</p>                                                                                                                                                                                                                                                              |                                                                                            |                         |              |                   |
| <p><b><sup>11</sup>B NMR (128.4 MHz, CDCl<sub>3</sub>) δ:</b> 37.1</p>                                                                                                                                                                                                                                                                                                                                                                                                                                |                                                                                            |                         |              |                   |
| <p><b>Anal. Calcd.:</b> C, 55.57; H, 5.44; N, 3.60; <b>Found:</b> C, 55.34; H, 5.62; N, 3.43;</p>                                                                                                                                                                                                                                                                                                                                                                                                     |                                                                                            |                         |              |                   |

| Chem. Name                                                                                                                                                                                                                                                                                                                                                                                                                                                                                      | <b>B,B',B''-Tris(3-iodo-2,4,6-trimethylphenyl)-N,N',N''-tris(4-tertbutylphenyl)borazine (13)</b> |                         |              |                   |          |
|-------------------------------------------------------------------------------------------------------------------------------------------------------------------------------------------------------------------------------------------------------------------------------------------------------------------------------------------------------------------------------------------------------------------------------------------------------------------------------------------------|--------------------------------------------------------------------------------------------------|-------------------------|--------------|-------------------|----------|
| <p style="text-align: center;">Molecular Weight: 1209,34<br/><b>13</b></p>                                                                                                                                                                                                                                                                                                                                                                                                                      |                                                                                                  |                         |              |                   |          |
| <b>METHOD:</b>                                                                                                                                                                                                                                                                                                                                                                                                                                                                                  |                                                                                                  |                         |              |                   |          |
| Ball miller jar was loaded with borazine <b>3</b> (0.08 mmol, 66.5 mg), NIS 3 eq (0.24 mmol, 54 mg), TsOH 3 eq (0.24 mmol, 45.6 mg) and a single zirconium oxide ball. The mixture was milled for 1h. The resulting powder was scraped from the jar, the jar was washed thoroughly with MeOH and the resulting suspension was added to the scraped powder. The suspension in MeOH was sonicated for 10 minutes then filtered to recover product <b>13</b> , <b>84% 81 mg</b> as a white powder. |                                                                                                  |                         |              |                   |          |
| <b>Mol Formula</b>                                                                                                                                                                                                                                                                                                                                                                                                                                                                              |                                                                                                  | $C_{57}H_{69}B_3I_3N_3$ |              | <b>m. p.</b>      | > 300 °C |
| <b><sup>1</sup>H NMR (400 MHz, CDCl<sub>3</sub>)</b>                                                                                                                                                                                                                                                                                                                                                                                                                                            | <b>δ Value</b>                                                                                   | <b>No. H</b>            | <b>Mult.</b> | <b>J Value/Hz</b> |          |
|                                                                                                                                                                                                                                                                                                                                                                                                                                                                                                 | 1.05                                                                                             | 27                      | s            |                   |          |
|                                                                                                                                                                                                                                                                                                                                                                                                                                                                                                 | 2.12                                                                                             | 9                       | s            |                   |          |
|                                                                                                                                                                                                                                                                                                                                                                                                                                                                                                 | 2.22-2.17                                                                                        | 9                       | m            |                   |          |
|                                                                                                                                                                                                                                                                                                                                                                                                                                                                                                 | 2.40-2.33                                                                                        | 9                       | m            |                   |          |
|                                                                                                                                                                                                                                                                                                                                                                                                                                                                                                 | 6.44-6.40                                                                                        | 3                       | m            |                   |          |
|                                                                                                                                                                                                                                                                                                                                                                                                                                                                                                 | 6.74-6.61                                                                                        | 12                      | m            |                   |          |
| <b><sup>13</sup>C NMR (100.6 MHz, CDCl<sub>3</sub>) δ:</b> 147.2, 143.0, 140.8-140.6, 140.0, 137.3, 127.5, 126.1, 123.8, 105.2, 34.1, 32.2-32.1, 31.3, 29.5, 22.4. (One peak is missing due to boron quadrupolar relaxation)                                                                                                                                                                                                                                                                    |                                                                                                  |                         |              |                   |          |
| <b><sup>11</sup>B NMR (128.4 MHz, CDCl<sub>3</sub>) δ:</b> 36.6                                                                                                                                                                                                                                                                                                                                                                                                                                 |                                                                                                  |                         |              |                   |          |
| <b>Anal. Calcd.:</b> C, 56.61; H, 5.75; N, 3.47; <b>Found:</b> C, 56.92; H, 5.53; N, 3.45;                                                                                                                                                                                                                                                                                                                                                                                                      |                                                                                                  |                         |              |                   |          |

| Chem. Name                                                                                                                                                                                                                                                                                                                                                                                                                                                                                                                                                                                | B,B',B''-Tris(4-iodo-2,3,5,6-tetramethylphenyl)-N,N',N''-tris(4-tertbutylphenyl)borazine ( <b>14</b> ) |                                                                              |              |                   |          |
|-------------------------------------------------------------------------------------------------------------------------------------------------------------------------------------------------------------------------------------------------------------------------------------------------------------------------------------------------------------------------------------------------------------------------------------------------------------------------------------------------------------------------------------------------------------------------------------------|--------------------------------------------------------------------------------------------------------|------------------------------------------------------------------------------|--------------|-------------------|----------|
| <div style="display: flex; justify-content: space-around; align-items: center;"> <div style="text-align: center;"> 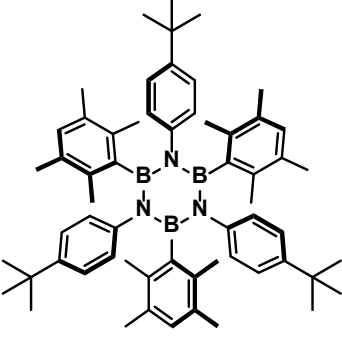 <p><b>4</b></p> </div> <div style="text-align: center;"> <p>NIS 3 eq<br/>TsOH 3 eq<br/>1h, 30Hz, R.T.</p>  </div> <div style="text-align: center;">  <p>Molecular Weight: 1251,42<br/><b>14</b></p> </div> </div> |                                                                                                        |                                                                              |              |                   |          |
| <p><b>METHOD:</b><br/>Ball miller jar was loaded with borazine <b>4</b> (0.08 mmol, 69.9 mg), NIS 3 eq (0.24 mmol, 54 mg), TsOH 3 eq (0.24 mmol, 45.6 mg) and a single zirconium oxide ball. The mixture was milled for 1h. The resulting powder was scraped from the jar, the jar was washed thoroughly with MeOH and the resulting suspension was added to the scraped powder. The suspension in MeOH was sonicated for 10 minutes then filtered to recover product <b>14</b>, <b>83% 83 mg</b> as a white powder.</p>                                                                  |                                                                                                        |                                                                              |              |                   |          |
| <b>Mol Formula</b>                                                                                                                                                                                                                                                                                                                                                                                                                                                                                                                                                                        |                                                                                                        | C <sub>60</sub> H <sub>75</sub> B <sub>3</sub> I <sub>3</sub> N <sub>3</sub> |              | <b>m. p.</b>      | > 300 °C |
| <b><sup>1</sup>H NMR<br/>(400 MHz,<br/>CDCl<sub>3</sub>)</b>                                                                                                                                                                                                                                                                                                                                                                                                                                                                                                                              | <b>δ Value</b>                                                                                         | <b>No. H</b>                                                                 | <b>Mult.</b> | <b>J Value/Hz</b> |          |
|                                                                                                                                                                                                                                                                                                                                                                                                                                                                                                                                                                                           | 1.04                                                                                                   | 27                                                                           | s            |                   |          |
|                                                                                                                                                                                                                                                                                                                                                                                                                                                                                                                                                                                           | 2.14                                                                                                   | 18                                                                           | s            |                   |          |
|                                                                                                                                                                                                                                                                                                                                                                                                                                                                                                                                                                                           | 2.27                                                                                                   | 18                                                                           | s            |                   |          |
|                                                                                                                                                                                                                                                                                                                                                                                                                                                                                                                                                                                           | 6.60-6.58                                                                                              | 6                                                                            | d            | 8.56              |          |
| 6.69-6.67                                                                                                                                                                                                                                                                                                                                                                                                                                                                                                                                                                                 | 6                                                                                                      | d                                                                            | 8.68         |                   |          |
| <p><b><sup>13</sup>C NMR (100.6 MHz, CDCl<sub>3</sub>) δ:</b> 147.1, 143.3, 135.9, 134.1, 126.0, 123.6, 110.7, 34.1, 31.4, 26.8, 23.7. (One peak is missing due to boron quadrupolar relaxation)</p>                                                                                                                                                                                                                                                                                                                                                                                      |                                                                                                        |                                                                              |              |                   |          |
| <p><b><sup>11</sup>B NMR (128.4 MHz, CDCl<sub>3</sub>) δ:</b> 36.9</p>                                                                                                                                                                                                                                                                                                                                                                                                                                                                                                                    |                                                                                                        |                                                                              |              |                   |          |
| <p><b>Anal. Calcd.:</b> C, 57.59; H, 6.04; N, 3.36; <b>Found:</b> C, 57.65; H, 6.00; N, 3.40;</p>                                                                                                                                                                                                                                                                                                                                                                                                                                                                                         |                                                                                                        |                                                                              |              |                   |          |

| Chem. Name                                                                                                                                                                                                                                                                                                                                                                                                                                                                                                                | <b>B,B',B''-Tris(3,5-diiodo-2,4,6-trimethylphenyl)-N,N',N''-tris(4-tertbutylphenyl)borazine (15)</b> |                                                                              |              |                   |          |
|---------------------------------------------------------------------------------------------------------------------------------------------------------------------------------------------------------------------------------------------------------------------------------------------------------------------------------------------------------------------------------------------------------------------------------------------------------------------------------------------------------------------------|------------------------------------------------------------------------------------------------------|------------------------------------------------------------------------------|--------------|-------------------|----------|
| <div style="display: flex; align-items: center; justify-content: center;"> 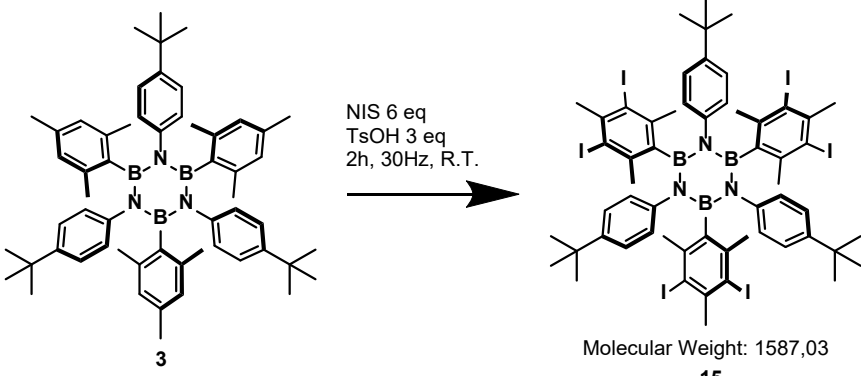 </div> <p style="text-align: center; margin-top: 10px;">Molecular Weight: 1587.03<br/><b>15</b></p>                                                                                                                                                                                                                                                         |                                                                                                      |                                                                              |              |                   |          |
| <p><b>METHOD:</b><br/>Ball miller jar was loaded with borazine <b>3</b> (0.08 mmol, 66.5 mg), NIS 6 eq (0.48 mmol, 108 mg), TsOH 3 eq (0.24 mmol, 45.6 mg) and a single zirconium oxide ball. The mixture was milled for 2h. The resulting powder was scraped from the jar, the jar was washed thoroughly with MeOH and the resulting suspension was added to the scraped powder. The suspension in MeOH was sonicated for 10 minutes then filtered to recover product <b>15</b>, <b>53% 67 mg</b> as a white powder.</p> |                                                                                                      |                                                                              |              |                   |          |
| <b>Mol Formula</b>                                                                                                                                                                                                                                                                                                                                                                                                                                                                                                        |                                                                                                      | C <sub>57</sub> H <sub>66</sub> B <sub>3</sub> I <sub>6</sub> N <sub>3</sub> |              | <b>m. p.</b>      | > 300 °C |
| <b><sup>1</sup>H NMR<br/>(400 MHz,<br/>CDCl<sub>3</sub>)</b>                                                                                                                                                                                                                                                                                                                                                                                                                                                              | <b>δ Value</b>                                                                                       | <b>No. H</b>                                                                 | <b>Mult.</b> | <b>J Value/Hz</b> |          |
|                                                                                                                                                                                                                                                                                                                                                                                                                                                                                                                           | 1.07                                                                                                 | 27                                                                           | s            |                   |          |
|                                                                                                                                                                                                                                                                                                                                                                                                                                                                                                                           | 2.43                                                                                                 | 18                                                                           | s            |                   |          |
|                                                                                                                                                                                                                                                                                                                                                                                                                                                                                                                           | 2.65                                                                                                 | 9                                                                            | s            |                   |          |
|                                                                                                                                                                                                                                                                                                                                                                                                                                                                                                                           | 6.62-6.60                                                                                            | 6                                                                            | d            | 8.52              |          |
| 6.79-6.77                                                                                                                                                                                                                                                                                                                                                                                                                                                                                                                 | 6                                                                                                    | d                                                                            | 8.56         |                   |          |
| <p><b><sup>13</sup>C NMR (100.6 MHz, CDCl<sub>3</sub>) δ:</b> 147.9, 142.5, 142.0, 140.9, 125.6, 124.3, 104.3, 37.9, 34.2, 32.4, 31.3. (One peak is missing due to boron quadrupolar relaxation)</p>                                                                                                                                                                                                                                                                                                                      |                                                                                                      |                                                                              |              |                   |          |
| <p><b><sup>11</sup>B NMR (128.4 MHz, CDCl<sub>3</sub>) δ:</b> 37.3</p>                                                                                                                                                                                                                                                                                                                                                                                                                                                    |                                                                                                      |                                                                              |              |                   |          |
| <p><b>Anal. Calcd.:</b> C, 43.14; H, 4.19; N, 2.65; <b>Found:</b> C, 42.93; H, 4.28; N, 2.68;</p>                                                                                                                                                                                                                                                                                                                                                                                                                         |                                                                                                      |                                                                              |              |                   |          |

| Chem. Name                                                                                                                                                                                                                                                                                                                                                                                                                                                                                                                                                                                | <b>B,B',B''-Tris(3,5-diiodo-2,4,6-trimethylphenyl)-N,N',N''-tris(4-isopropylphenyl)borazine (16)</b> |                                                                              |              |                   |        |
|-------------------------------------------------------------------------------------------------------------------------------------------------------------------------------------------------------------------------------------------------------------------------------------------------------------------------------------------------------------------------------------------------------------------------------------------------------------------------------------------------------------------------------------------------------------------------------------------|------------------------------------------------------------------------------------------------------|------------------------------------------------------------------------------|--------------|-------------------|--------|
| <div style="display: flex; justify-content: space-around; align-items: center;"> <div style="text-align: center;"> 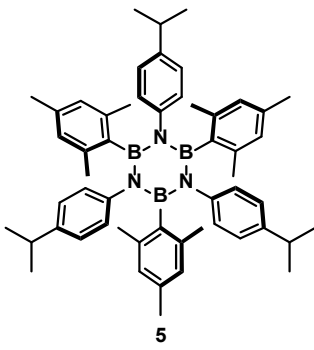 <p><b>5</b></p> </div> <div style="text-align: center;"> <p>NIS 6 eq<br/>TsOH 3 eq<br/>2h, 30Hz, R.T.</p>  </div> <div style="text-align: center;">  <p>Molecular Weight: 1544,95<br/><b>16</b></p> </div> </div> |                                                                                                      |                                                                              |              |                   |        |
| <p><b>METHOD:</b><br/>Ball miller jar was loaded with borazine <b>5</b> (0.08 mmol, 63 mg), NIS 6 eq (0.48 mmol, 108 mg), TsOH 3 eq (0.24 mmol, 45.6 mg) and a single zirconium oxide ball. The mixture was milled for 2h. The resulting powder was scraped from the jar, the jar was washed thoroughly with MeOH and the resulting suspension was added to the scraped powder. The suspension in MeOH was sonicated for 10 minutes then filtered to recover product <b>16</b>, <b>45% 56 mg</b> as a white powder.</p>                                                                   |                                                                                                      |                                                                              |              |                   |        |
| <b>Mol Formula</b>                                                                                                                                                                                                                                                                                                                                                                                                                                                                                                                                                                        |                                                                                                      | C <sub>54</sub> H <sub>60</sub> B <sub>3</sub> I <sub>6</sub> N <sub>3</sub> |              | <b>m. p.</b>      | 288 °C |
| <b><sup>1</sup>H NMR<br/>(400 MHz,<br/>CDCl<sub>3</sub>)</b>                                                                                                                                                                                                                                                                                                                                                                                                                                                                                                                              | <b>δ Value</b>                                                                                       | <b>No. H</b>                                                                 | <b>Mult.</b> | <b>J Value/Hz</b> |        |
|                                                                                                                                                                                                                                                                                                                                                                                                                                                                                                                                                                                           | 0.99-0.98                                                                                            | 18                                                                           | d            | 6.84              |        |
|                                                                                                                                                                                                                                                                                                                                                                                                                                                                                                                                                                                           | 2.42                                                                                                 | 18                                                                           | s            |                   |        |
|                                                                                                                                                                                                                                                                                                                                                                                                                                                                                                                                                                                           | 2.63-2.56                                                                                            | 3                                                                            | m            |                   |        |
|                                                                                                                                                                                                                                                                                                                                                                                                                                                                                                                                                                                           | 2.65                                                                                                 | 8                                                                            | s            |                   |        |
| 6.65-6.60                                                                                                                                                                                                                                                                                                                                                                                                                                                                                                                                                                                 | 12                                                                                                   | m                                                                            |              |                   |        |
| <p><b><sup>13</sup>C NMR (100.6 MHz, CDCl<sub>3</sub>) δ:</b> 145.7, 142.8, 142.1, 140.8, 125.9, 125.4, 104.3, 37.9, 33.4, 32.5, 23.9. (One peak is missing due to boron quadrupolar relaxation)</p>                                                                                                                                                                                                                                                                                                                                                                                      |                                                                                                      |                                                                              |              |                   |        |
| <p><b><sup>11</sup>B NMR (128.4 MHz, CDCl<sub>3</sub>) δ:</b> 36.6</p>                                                                                                                                                                                                                                                                                                                                                                                                                                                                                                                    |                                                                                                      |                                                                              |              |                   |        |
| <p><b>Anal. Calcd.:</b> C, 41.98; H, 3.91; N, 2.72; <b>Found:</b> C, 41.82; H, 3.97; N, 2.79;</p>                                                                                                                                                                                                                                                                                                                                                                                                                                                                                         |                                                                                                      |                                                                              |              |                   |        |



| Chem. Name                                                                                                                                                                                                                                                                                                                                                                                                                                                                                          | B,B',B''-Tris(3-iodo-2,4,6-trimethylphenyl)-N,N',N''-tris(4-isopropylphenyl)borazine (17) |              |              |                   |
|-----------------------------------------------------------------------------------------------------------------------------------------------------------------------------------------------------------------------------------------------------------------------------------------------------------------------------------------------------------------------------------------------------------------------------------------------------------------------------------------------------|-------------------------------------------------------------------------------------------|--------------|--------------|-------------------|
|                                                                                                                                                                                                                                                                                                                                                                                                                                                                                                     |                                                                                           |              |              |                   |
| <b>METHOD:</b>                                                                                                                                                                                                                                                                                                                                                                                                                                                                                      |                                                                                           |              |              |                   |
| <p>Ball miller jar was loaded with borazine <b>5</b> (0.08 mmol, 64 mg), NIS 3 eq (0.24 mmol, 54 mg), TsOH 3 eq (0.24 mmol, 45.6 mg) and a single zirconium oxide ball. The mixture was milled for 1h. The resulting powder was scraped from the jar, the jar was washed thoroughly with MeOH and the resulting suspension was added to the scraped powder. The suspension in MeOH was sonicated for 10 minutes then filtered to recover product <b>17</b>, <b>94% 88 mg</b> as a white powder.</p> |                                                                                           |              |              |                   |
| <b>Mol Formula</b>                                                                                                                                                                                                                                                                                                                                                                                                                                                                                  | C <sub>54</sub> H <sub>63</sub> B <sub>3</sub> I <sub>3</sub> N <sub>3</sub>              |              | <b>m. p.</b> |                   |
|                                                                                                                                                                                                                                                                                                                                                                                                                                                                                                     | 254 °C                                                                                    |              |              |                   |
| <b><sup>1</sup>H NMR (400 MHz, CDCl<sub>3</sub>)</b>                                                                                                                                                                                                                                                                                                                                                                                                                                                | <b>δ Value</b>                                                                            | <b>No. H</b> | <b>Mult.</b> | <b>J Value/Hz</b> |
|                                                                                                                                                                                                                                                                                                                                                                                                                                                                                                     | 0.98-0.96                                                                                 | 18           | d            | 6.96              |
|                                                                                                                                                                                                                                                                                                                                                                                                                                                                                                     | 2.13                                                                                      | 9            | s            |                   |
|                                                                                                                                                                                                                                                                                                                                                                                                                                                                                                     | 2.22-2.17                                                                                 | 9            | m            |                   |
|                                                                                                                                                                                                                                                                                                                                                                                                                                                                                                     | 2.40-2.34                                                                                 | 9            | m            |                   |
|                                                                                                                                                                                                                                                                                                                                                                                                                                                                                                     | 2.61-2.54                                                                                 | 3            | m            |                   |
|                                                                                                                                                                                                                                                                                                                                                                                                                                                                                                     | 6.43-6.40                                                                                 | 3            | m            |                   |
| 6.65-6.57                                                                                                                                                                                                                                                                                                                                                                                                                                                                                           | 12                                                                                        | m            |              |                   |
| <b><sup>13</sup>C NMR (100.6 MHz, CDCl<sub>3</sub>) δ:</b> 145.0, 143.4, 140.7-140.6, 140.1, 137.3-137.2, 127.5, 126.5-126.2, 125.1-124.7, 105.3, 33.4-33.3, 32.1, 29.5, 24.0-23.9, 22.4. (One peak is missing due to boron quadrupolar relaxation)                                                                                                                                                                                                                                                 |                                                                                           |              |              |                   |
| <b><sup>11</sup>B NMR (128.4 MHz, CDCl<sub>3</sub>) δ:</b> 36.5                                                                                                                                                                                                                                                                                                                                                                                                                                     |                                                                                           |              |              |                   |
| <b>Anal. Calcd.:</b> C, 55.57; H, 5.44; N, 3.60; <b>Found:</b> C, 55.43; H, 5.71; N, 3.76;                                                                                                                                                                                                                                                                                                                                                                                                          |                                                                                           |              |              |                   |

| Chem. Name                                                                                                                                                                                                                                                                                                                                                                                                                                                                                          |                | <b>B,B',B''-Tris(3-iodo-2,4,6-trimethylphenyl)-N,N',N''-tris(phenyl)borazine (18)</b> |              |                   |          |
|-----------------------------------------------------------------------------------------------------------------------------------------------------------------------------------------------------------------------------------------------------------------------------------------------------------------------------------------------------------------------------------------------------------------------------------------------------------------------------------------------------|----------------|---------------------------------------------------------------------------------------|--------------|-------------------|----------|
|                                                                                                                                                                                                                                                                                                                                                                                                                                                                                                     |                | <p>Molecular Weight: 1041,02<br/><b>18</b></p>                                        |              |                   |          |
| <b>METHOD:</b>                                                                                                                                                                                                                                                                                                                                                                                                                                                                                      |                |                                                                                       |              |                   |          |
| <p>Ball miller jar was loaded with borazine <b>6</b> (0.08 mmol, 53 mg), NIS 3 eq (0.24 mmol, 54 mg), TsOH 3 eq (0.24 mmol, 45.6 mg) and a single zirconium oxide ball. The mixture was milled for 1h. The resulting powder was scraped from the jar, the jar was washed thoroughly with MeOH and the resulting suspension was added to the scraped powder. The suspension in MeOH was sonicated for 10 minutes then filtered to recover product <b>18</b>, <b>89% 74 mg</b> as a white powder.</p> |                |                                                                                       |              |                   |          |
| <b>Mol Formula</b>                                                                                                                                                                                                                                                                                                                                                                                                                                                                                  |                | C <sub>45</sub> H <sub>45</sub> B <sub>3</sub> I <sub>3</sub> N <sub>3</sub>          |              | <b>m. p.</b>      | > 300 °C |
| <b><sup>1</sup>H NMR (400 MHz, CDCl<sub>3</sub>)</b>                                                                                                                                                                                                                                                                                                                                                                                                                                                | <b>δ Value</b> | <b>No. H</b>                                                                          | <b>Mult.</b> | <b>J Value/Hz</b> |          |
|                                                                                                                                                                                                                                                                                                                                                                                                                                                                                                     | 2.12           | 9                                                                                     | s            |                   |          |
|                                                                                                                                                                                                                                                                                                                                                                                                                                                                                                     | 2.24-2.19      | 9                                                                                     | m            |                   |          |
|                                                                                                                                                                                                                                                                                                                                                                                                                                                                                                     | 2.47-2.42      | 9                                                                                     | m            |                   |          |
|                                                                                                                                                                                                                                                                                                                                                                                                                                                                                                     | 6.41           | 3                                                                                     | m            |                   |          |
|                                                                                                                                                                                                                                                                                                                                                                                                                                                                                                     | 6.80-6.76      | 15                                                                                    | m            |                   |          |
| <p><b><sup>13</sup>C NMR (100.6 MHz, CDCl<sub>3</sub>) δ:</b> 145.8, 140.5-140.4, 137.1-137.0, 127.7-127.6, 127.5-127.2, 126.7-126.3, 125.0, 105.4, 105.3, 32.2-32.1, 29.6, 22.5-22.4. (One peak is missing due to boron quadrupolar relaxation)</p>                                                                                                                                                                                                                                                |                |                                                                                       |              |                   |          |
| <p><b><sup>11</sup>B NMR (128.4 MHz, CDCl<sub>3</sub>) δ:</b> 37.2</p>                                                                                                                                                                                                                                                                                                                                                                                                                              |                |                                                                                       |              |                   |          |
| <p><b>Anal. Calcd.:</b> C, 51.92; H, 4.36; N, 4.04; <b>Found:</b> C, 51.81; H, 4.39; N, 4.17;</p>                                                                                                                                                                                                                                                                                                                                                                                                   |                |                                                                                       |              |                   |          |

| Chem. Name                                                                                                                                                                                                                                                                                                                                                                                                                                                                                              | <b>B,B',B''-Tris(3-iodo-2,6-dimethylphenyl)-N,N',N''-tris(4-isopropylphenyl)borazine (19)</b> |                         |              |                   |        |
|---------------------------------------------------------------------------------------------------------------------------------------------------------------------------------------------------------------------------------------------------------------------------------------------------------------------------------------------------------------------------------------------------------------------------------------------------------------------------------------------------------|-----------------------------------------------------------------------------------------------|-------------------------|--------------|-------------------|--------|
| <p style="text-align: center;">Molecular Weight: 1125,18<br/><b>19</b></p>                                                                                                                                                                                                                                                                                                                                                                                                                              |                                                                                               |                         |              |                   |        |
| <b>METHOD:</b>                                                                                                                                                                                                                                                                                                                                                                                                                                                                                          |                                                                                               |                         |              |                   |        |
| <p>Ball miller jar was loaded with borazine <b>7</b> (0.08 mmol, 59.8 mg), NIS 3 eq (0.24 mmol, 54 mg), TsOH 3 eq (0.24 mmol, 45.6 mg) and a single zirconium oxide ball. The mixture was milled for 1h. The resulting powder was scraped from the jar, the jar was washed thoroughly with MeOH and the resulting suspension was added to the scraped powder. The suspension in MeOH was sonicated for 10 minutes then filtered to recover product <b>19</b>, <b>85% 76.5 mg</b> as a white powder.</p> |                                                                                               |                         |              |                   |        |
| <b>Mol Formula</b>                                                                                                                                                                                                                                                                                                                                                                                                                                                                                      |                                                                                               | $C_{51}H_{57}B_3I_3N_3$ |              | <b>m. p.</b>      | 263 °C |
| <b><sup>1</sup>H NMR (400 MHz, CDCl<sub>3</sub>)</b>                                                                                                                                                                                                                                                                                                                                                                                                                                                    | <b>δ Value</b>                                                                                | <b>No. H</b>            | <b>Mult.</b> | <b>J Value/Hz</b> |        |
|                                                                                                                                                                                                                                                                                                                                                                                                                                                                                                         | 1.00-0.98                                                                                     | 18                      | m            |                   |        |
|                                                                                                                                                                                                                                                                                                                                                                                                                                                                                                         | 2.25-2.21                                                                                     | 9                       | m            |                   |        |
|                                                                                                                                                                                                                                                                                                                                                                                                                                                                                                         | 2.36-2.30                                                                                     | 9                       | m            |                   |        |
|                                                                                                                                                                                                                                                                                                                                                                                                                                                                                                         | 2.62-2.55                                                                                     | 3                       | m            |                   |        |
|                                                                                                                                                                                                                                                                                                                                                                                                                                                                                                         | 6.27-6.22                                                                                     | 3                       | m            |                   |        |
|                                                                                                                                                                                                                                                                                                                                                                                                                                                                                                         | 6.67-6.55                                                                                     | 12                      | m            |                   |        |
|                                                                                                                                                                                                                                                                                                                                                                                                                                                                                                         | 7.24-7.22                                                                                     | 3                       | d            | 8.08              |        |
| <b><sup>13</sup>C NMR (100.6 MHz, CDCl<sub>3</sub>) δ:</b> 145.3, 142.9, 139.9-139.8, 138.0-137.9, 137.7, 127.8, 126.5-126.1, 125.2-124.9, 97.9, 33.4-33.3, 30.6, 23.9, 22.7. (One peak is missing due to boron quadrupolar relaxation)                                                                                                                                                                                                                                                                 |                                                                                               |                         |              |                   |        |
| <b><sup>11</sup>B NMR (128.4 MHz, CDCl<sub>3</sub>) δ:</b> 37.1                                                                                                                                                                                                                                                                                                                                                                                                                                         |                                                                                               |                         |              |                   |        |
| <b>Anal. Calcd.:</b> C, 54.44; H, 5.11; N, 3.73; <b>Found:</b> C, 54.14; H, 5.30; N, 3.94                                                                                                                                                                                                                                                                                                                                                                                                               |                                                                                               |                         |              |                   |        |

| Chem. Name                                                                                                                                                                                                                                                                                                                                                                                                                                                                                                                 | B,B',B''-Tris(4-triflyl-2,6-dimethylphenyl)-N,N',N''-tris(4-iodo-3,5-dimethylphenyl)borazine (20) |                                                                                                                           |              |                   |     |
|----------------------------------------------------------------------------------------------------------------------------------------------------------------------------------------------------------------------------------------------------------------------------------------------------------------------------------------------------------------------------------------------------------------------------------------------------------------------------------------------------------------------------|---------------------------------------------------------------------------------------------------|---------------------------------------------------------------------------------------------------------------------------|--------------|-------------------|-----|
| <div style="display: flex; align-items: center; justify-content: center;"> <div style="text-align: center;"> 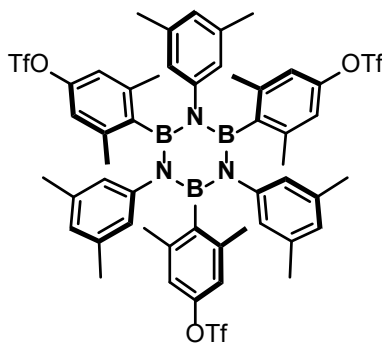 <p><b>9</b></p> </div> <div style="margin: 0 20px; text-align: center;"> <p>NIS 3 eq<br/>TsOH 3 eq<br/>4h, 30Hz, R.T.</p> <p>→</p> </div> <div style="text-align: center;">  <p>Molecular Weight: 1527,27<br/><b>20</b></p> </div> </div> |                                                                                                   |                                                                                                                           |              |                   |     |
| <p><b>METHOD:</b><br/>Ball miller jar was loaded with borazine <b>9</b> (0.08 mmol, 92 mg), NIS 3 eq (0.24 mmol, 54 mg), TsOH 3 eq (0.24 mmol, 45.6 mg) and a single zirconium oxide ball. The mixture was milled for 4h. The resulting powder was scraped from the jar, the jar was washed thoroughly with MeOH and the resulting suspension was added to the scraped powder. The suspension in MeOH was sonicated for 10 minutes then filtered to recover product <b>20</b>, <b>59% 72 mg</b> as a white powder.</p>     |                                                                                                   |                                                                                                                           |              |                   |     |
| <b>Mol Formula</b>                                                                                                                                                                                                                                                                                                                                                                                                                                                                                                         |                                                                                                   | C <sub>51</sub> H <sub>48</sub> B <sub>3</sub> F <sub>9</sub> I <sub>3</sub> N <sub>3</sub> O <sub>9</sub> S <sub>3</sub> |              | <b>m. p.</b>      | 251 |
| <b><sup>1</sup>H NMR (400 MHz, CDCl<sub>3</sub>)</b>                                                                                                                                                                                                                                                                                                                                                                                                                                                                       | <b>δ Value</b>                                                                                    | <b>No. H</b>                                                                                                              | <b>Mult.</b> | <b>J Value/Hz</b> |     |
|                                                                                                                                                                                                                                                                                                                                                                                                                                                                                                                            | 2.08                                                                                              | 18                                                                                                                        | s            |                   |     |
|                                                                                                                                                                                                                                                                                                                                                                                                                                                                                                                            | 2.27                                                                                              | 18                                                                                                                        | s            |                   |     |
|                                                                                                                                                                                                                                                                                                                                                                                                                                                                                                                            | 6.40                                                                                              | 6                                                                                                                         | s            |                   |     |
| 6.55                                                                                                                                                                                                                                                                                                                                                                                                                                                                                                                       | 6                                                                                                 | s                                                                                                                         |              |                   |     |
| <p><b><sup>13</sup>C NMR (100.6 MHz, CDCl<sub>3</sub>) δ:</b> 149.4, 144.1, 141.1, 140.2, 125.0, 118.5, 123.5-114.0 (CF<sub>3</sub>), 103.9, 29.1, 23.2. (One peak is missing due to boron quadrupolar relaxation)</p>                                                                                                                                                                                                                                                                                                     |                                                                                                   |                                                                                                                           |              |                   |     |
| <p><b><sup>11</sup>B NMR (128.4 MHz, CDCl<sub>3</sub>) δ:</b> 36.7</p>                                                                                                                                                                                                                                                                                                                                                                                                                                                     |                                                                                                   |                                                                                                                           |              |                   |     |
| <p><b><sup>19</sup>F NMR (376 MHz, CDCl<sub>3</sub>) δ:</b> -72.8</p>                                                                                                                                                                                                                                                                                                                                                                                                                                                      |                                                                                                   |                                                                                                                           |              |                   |     |
| <p><b>Anal. Calcd.:</b> C, 40.11; H, 3.17; N, 2.75; S, 6.30; <b>Found:</b> C, 40.40; H, 3.26; N, 2.57; S, 5.99;</p>                                                                                                                                                                                                                                                                                                                                                                                                        |                                                                                                   |                                                                                                                           |              |                   |     |

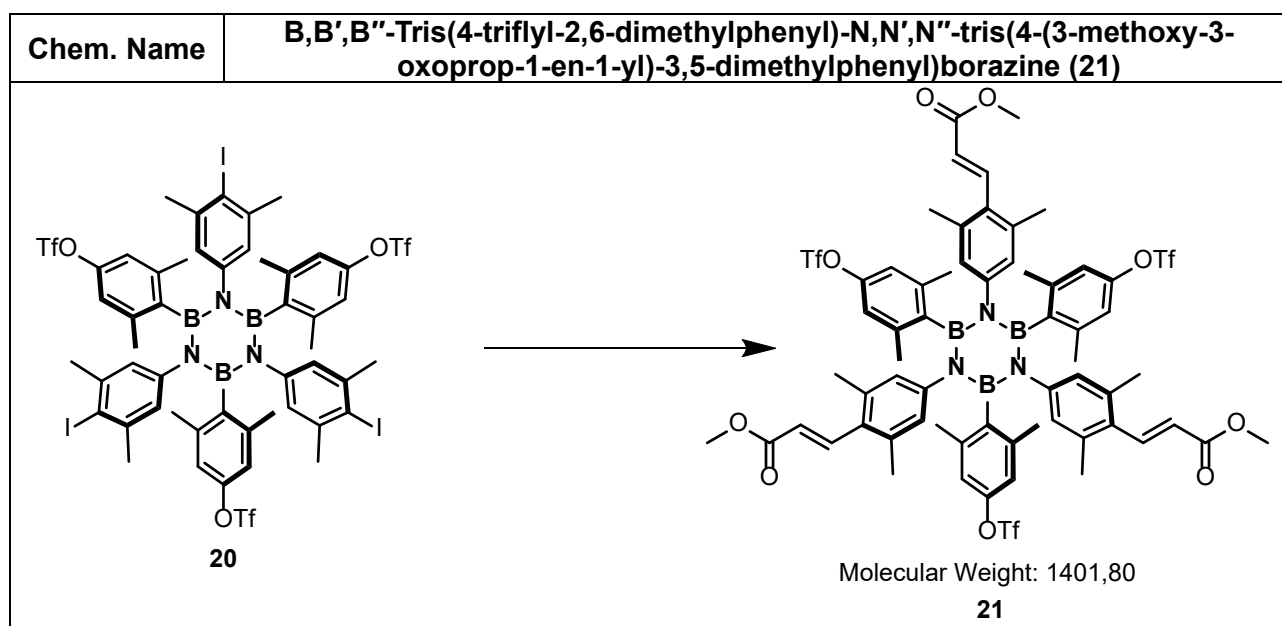

**METHOD:**

Catalyst solution: to an oven dried 10 mL Schlenk tube 5 mL of 4MeTHP was added, degassed through 3 freeze-pump-thaw cycles and backfilled with argon, under argon flow Pd(OAc)<sub>2</sub> 8.86 mg (50 mol%) and PPh<sub>3</sub> 52.45 mg (2.5 eq) were quickly added and stirred until development of a lime yellow color, indicative of the formation of the active catalyst.

To a 2 mL vial were added 0.08 mmol (122.2 mg) of borazine **20**, KOAc 6 eq, (0.48 mmol, 47 mg), methyl acrylate 9 eq (0.72 mmol, 61 mg, 65  $\mu$ L) and 1 mL of catalyst solution, the vial was rapidly capped and the solution stirred at 140 °C for 20h.

Upon reaction completion the vial was cooled to room temperature, stripped of solvent under vacuum and directly subjected to column chromatography (gradient elution ETP/EtOAc) to afford borazine **21** as an off white solid **31 mg, 28%**.

| <b>Mol Formula</b>                                                                                                                                                                                                                                            |                                  | <b>C<sub>63</sub>H<sub>63</sub>B<sub>3</sub>F<sub>9</sub>N<sub>3</sub>O<sub>15</sub>S<sub>3</sub></b> |              | <b>m. p.</b>      | 208 |
|---------------------------------------------------------------------------------------------------------------------------------------------------------------------------------------------------------------------------------------------------------------|----------------------------------|-------------------------------------------------------------------------------------------------------|--------------|-------------------|-----|
| <b><sup>1</sup>H NMR (400 MHz, CDCl<sub>3</sub>)</b>                                                                                                                                                                                                          | <b><math>\delta</math> Value</b> | <b>No. H</b>                                                                                          | <b>Mult.</b> | <b>J Value/Hz</b> |     |
|                                                                                                                                                                                                                                                               | 1.97                             | 18                                                                                                    | s            |                   |     |
|                                                                                                                                                                                                                                                               | 2.29                             | 18                                                                                                    | s            |                   |     |
|                                                                                                                                                                                                                                                               | 3.75                             | 9                                                                                                     | s            |                   |     |
|                                                                                                                                                                                                                                                               | 5.83-5.79                        | 3                                                                                                     | d            | 16.36             |     |
|                                                                                                                                                                                                                                                               | 6.42                             | 6                                                                                                     | s            |                   |     |
|                                                                                                                                                                                                                                                               | 6.54                             | 6                                                                                                     | s            |                   |     |
|                                                                                                                                                                                                                                                               | 7.55-7.51                        | 3                                                                                                     | d            | 16.40             |     |
| <b><sup>13</sup>C NMR (100.6 MHz, CDCl<sub>3</sub>) <math>\delta</math>: 167.3, 149.2, 144.4, 142.6, 140.3, 136.2, 131.0, 126.5, 123.3, 118.4, 123.5-114.0 (CF<sub>3</sub>), 51.3, 23.2, 20.8. (One peak is missing due to boron quadrupolar relaxation).</b> |                                  |                                                                                                       |              |                   |     |
| <b><sup>11</sup>B NMR (128.4 MHz, CDCl<sub>3</sub>) <math>\delta</math>: 37.4</b>                                                                                                                                                                             |                                  |                                                                                                       |              |                   |     |
| <b><sup>19</sup>F NMR (376 MHz, CDCl<sub>3</sub>) <math>\delta</math>: -73.0</b>                                                                                                                                                                              |                                  |                                                                                                       |              |                   |     |
| <b>Anal. Calcd.: C, 53.98; H, 4.53; N, 3.00; S, 6.86; Found: C, 53.58; H, 4.64; N, 2.84; S, 6.73;</b>                                                                                                                                                         |                                  |                                                                                                       |              |                   |     |

|                                                                                                                                                                                                                    |                                                              |                                       |              |                   |     |
|--------------------------------------------------------------------------------------------------------------------------------------------------------------------------------------------------------------------|--------------------------------------------------------------|---------------------------------------|--------------|-------------------|-----|
| Chem. Name                                                                                                                                                                                                         | (4-bromo-3,5-dimethylphenoxy)(tert-butyl)dimethylsilane (22) |                                       |              |                   |     |
| 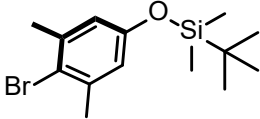 <p>Molecular Weight: 315,33</p>                                                                                                  |                                                              |                                       |              |                   |     |
| <b>METHOD:</b>                                                                                                                                                                                                     |                                                              |                                       |              |                   |     |
| Product <b>22</b> was made according to a literature procedure ( <i>J. Org. Chem.</i> , 2019, <b>84</b> , 9101–9116.), yield 90% 8.85g.<br>Characterization data is in accordance with literature reported values. |                                                              |                                       |              |                   |     |
| <b>Mol Formula</b>                                                                                                                                                                                                 |                                                              | C <sub>14</sub> H <sub>23</sub> BrOSi |              | <b>m. p.</b>      | oil |
| <b><sup>1</sup>H NMR<br/>(400 MHz,<br/>CDCl<sub>3</sub>)</b>                                                                                                                                                       | <b>δ Value</b>                                               | <b>No. H</b>                          | <b>Mult.</b> | <b>J Value/Hz</b> |     |
|                                                                                                                                                                                                                    | 0.19                                                         | 6                                     | s            |                   |     |
|                                                                                                                                                                                                                    | 0.98                                                         | 9                                     | s            |                   |     |
|                                                                                                                                                                                                                    | 2.35                                                         | 6                                     | s            |                   |     |
|                                                                                                                                                                                                                    | 6.58                                                         | 2                                     | s            |                   |     |
| <b><sup>13</sup>C NMR (100.6 MHz, CDCl<sub>3</sub>) δ:</b> 154.3, 139.1, 120.1, 119.1, 8.48, 77.2, 76.8, 25.8, 24.0, 18.3, -4.3.                                                                                   |                                                              |                                       |              |                   |     |

## 5. NMR Spectral Data

B,B',B''-Tris(4-(tertbutyl)-2,6-dimethylphenyl)-N,N',N''-tris(3,5-dimethylphenyl)borazine-(1)

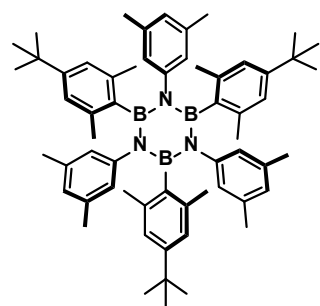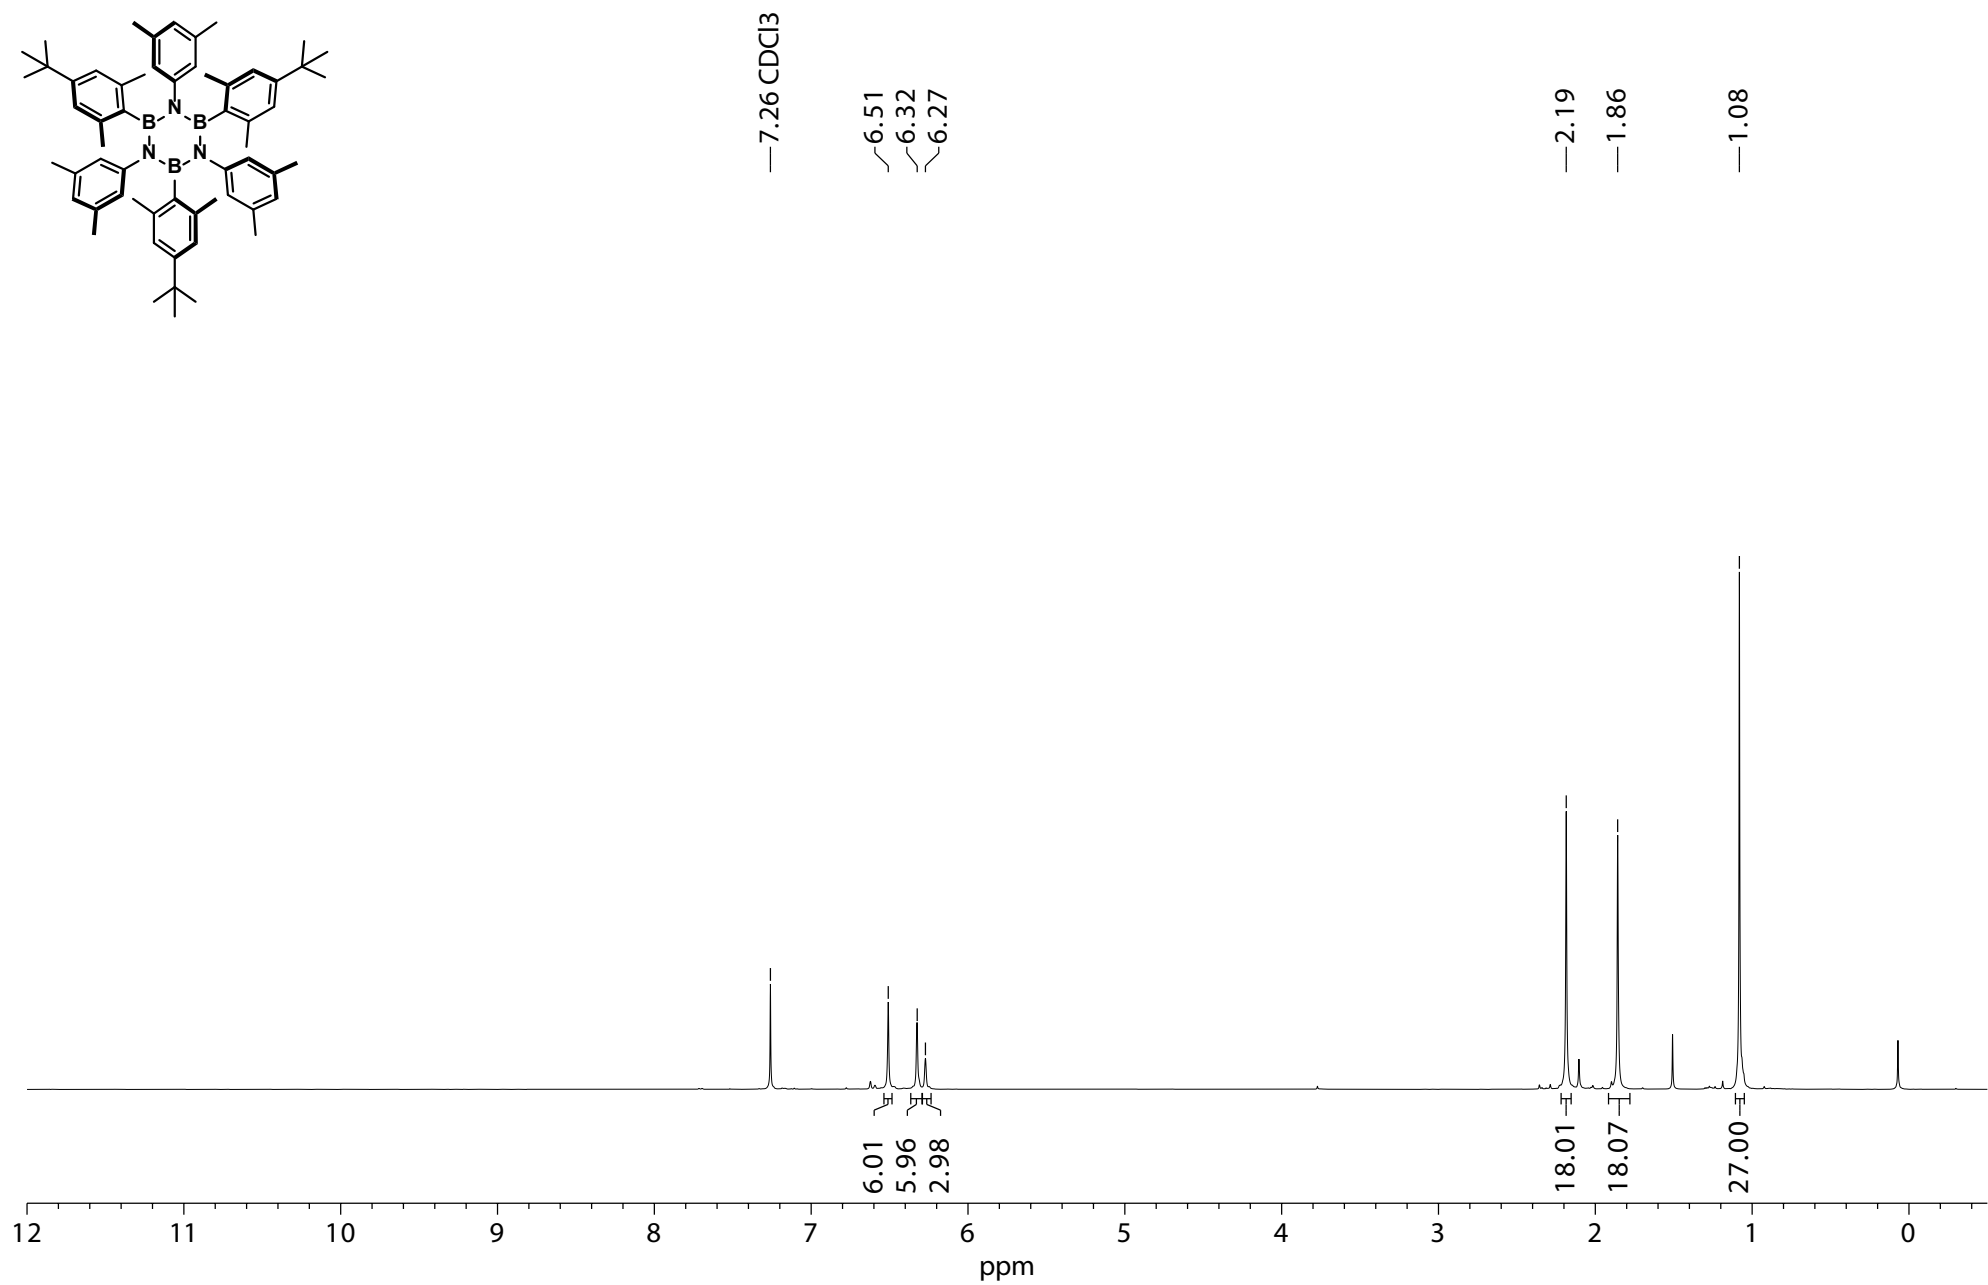

B,B',B''-Tris(4-(tertbutyl)-2,6-dimethylphenyl)-N,N',N''-tris(3,5-dimethylphenyl)borazine-(1)

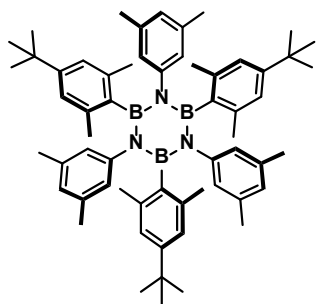

— 149.18  
— 145.96

~ 137.25  
~ 135.31

~ 125.63  
~ 125.17  
~ 122.14

{ 77.48 CDCl3  
{ 77.16 CDCl3  
{ 76.84 CDCl3

~ 34.04  
~ 31.32

~ 23.36  
~ 20.92

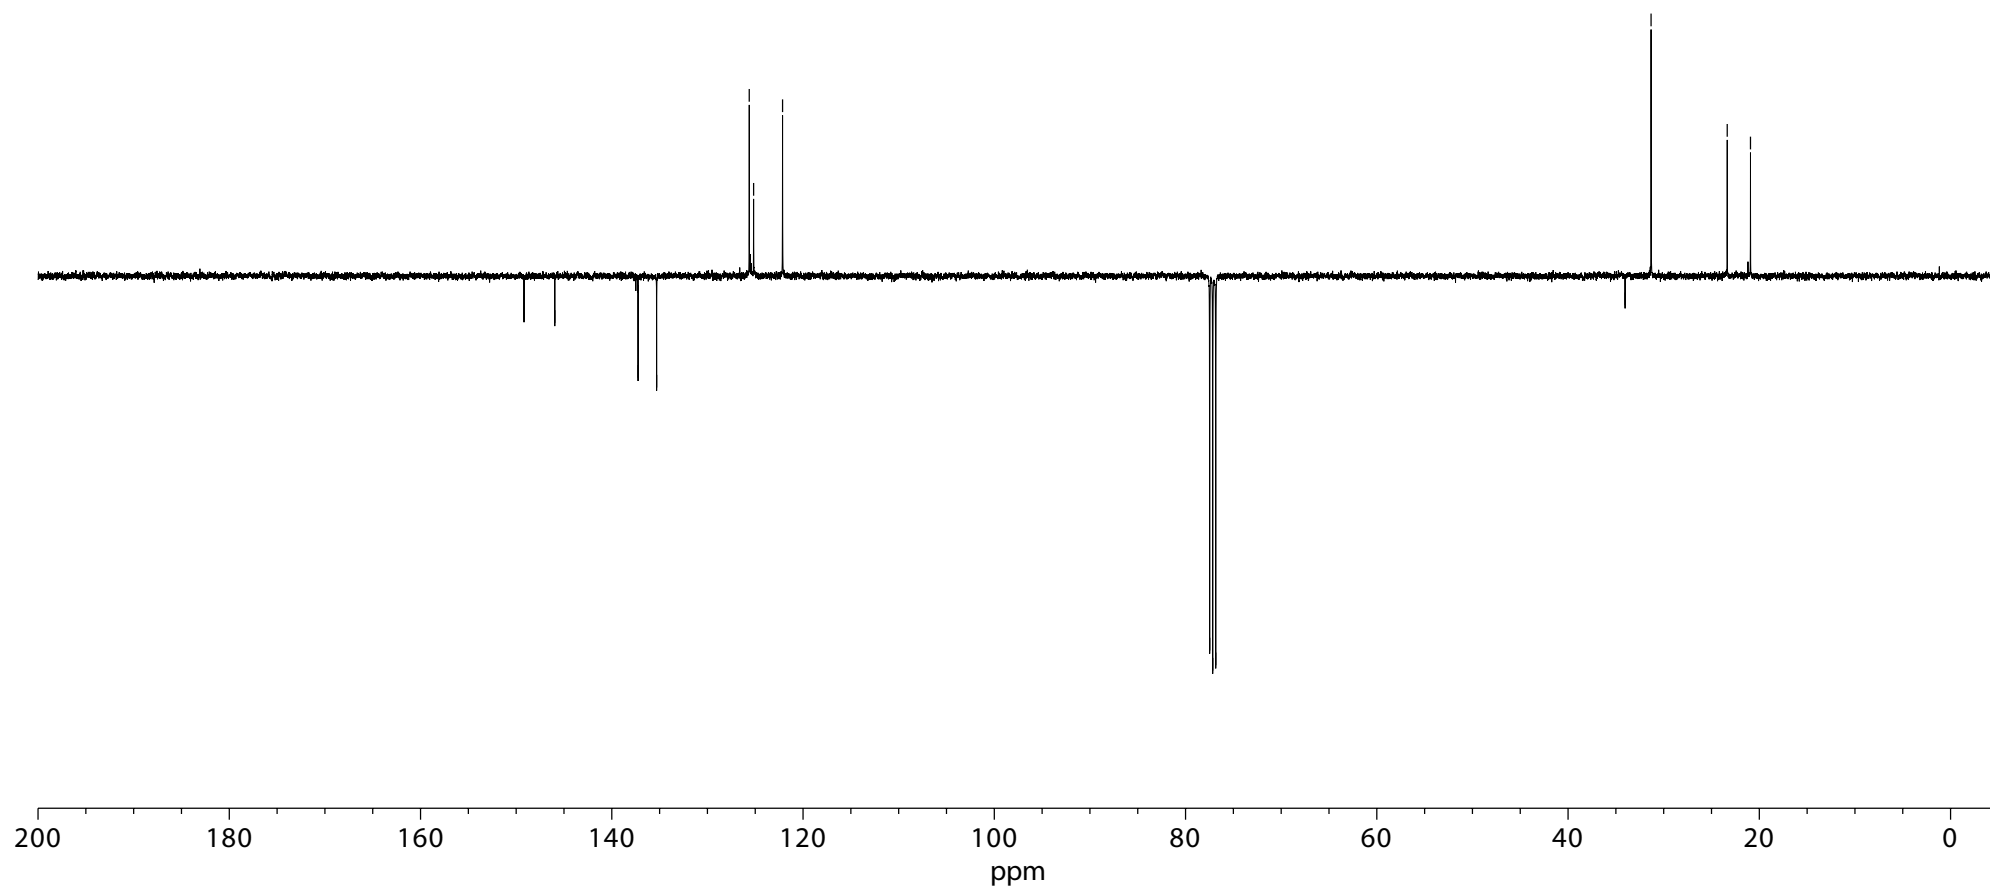



B,B',B''-Tris(4-(tertbutyl)-2,6-dimethylphenyl)-N,N',N''-tris(3,5-dimethylphenyl)borazine-(1)



—37.1

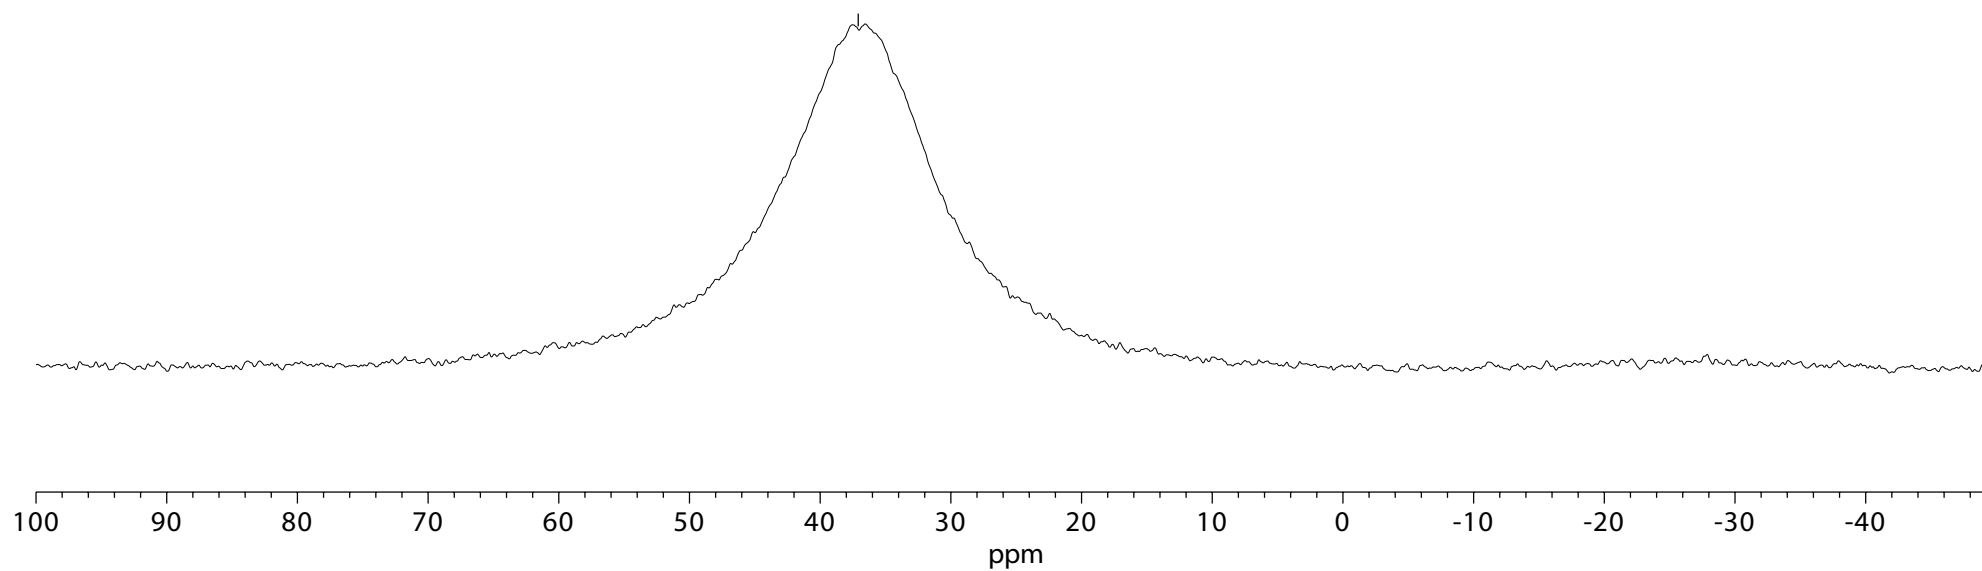

B,B',B''-Tris(2,6-dimethylphenyl)-N,N',N''-tris(4-tbutylphenyl)borazine-(2)

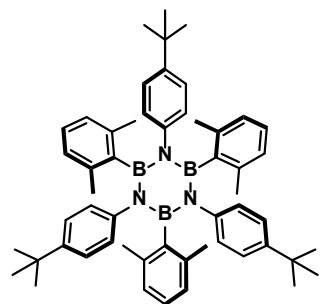

— 7.26 CDCl<sub>3</sub>  
6.69  
6.67  
6.65  
6.50  
6.48

— 2.25

— 1.02

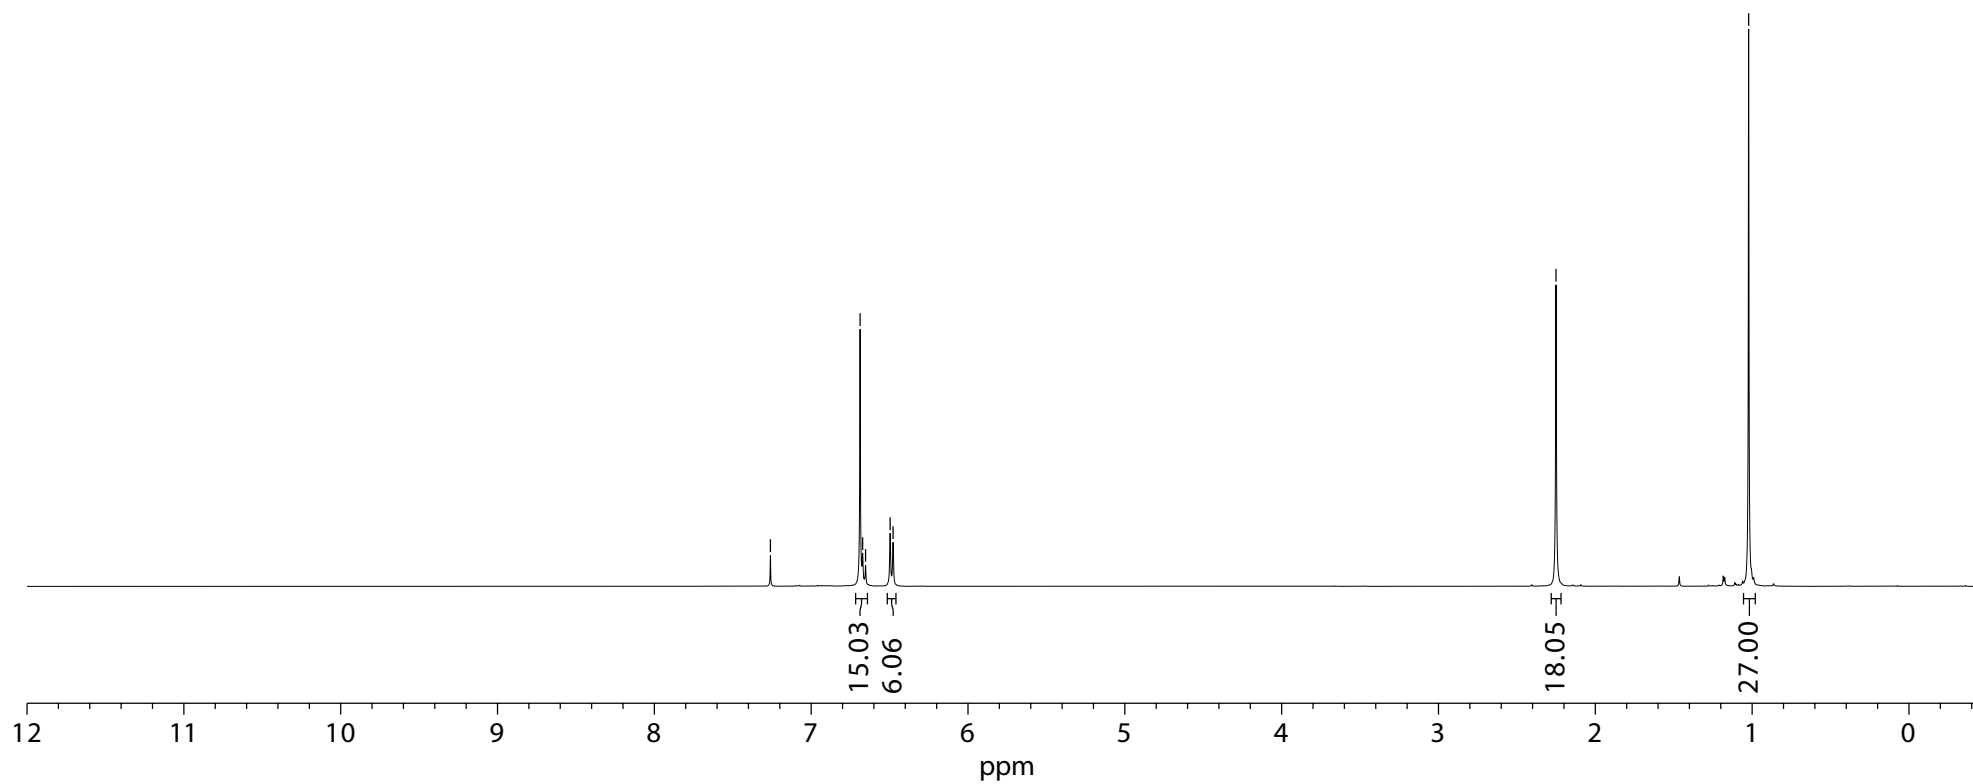

B,B',B''-Tris(2,6-dimethylphenyl)-N,N',N''-tris(4-*t*-butylphenyl)borazine-(2)

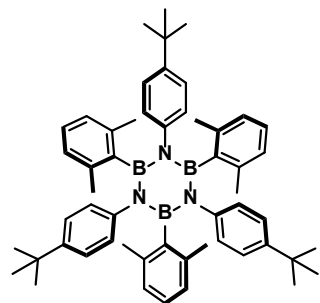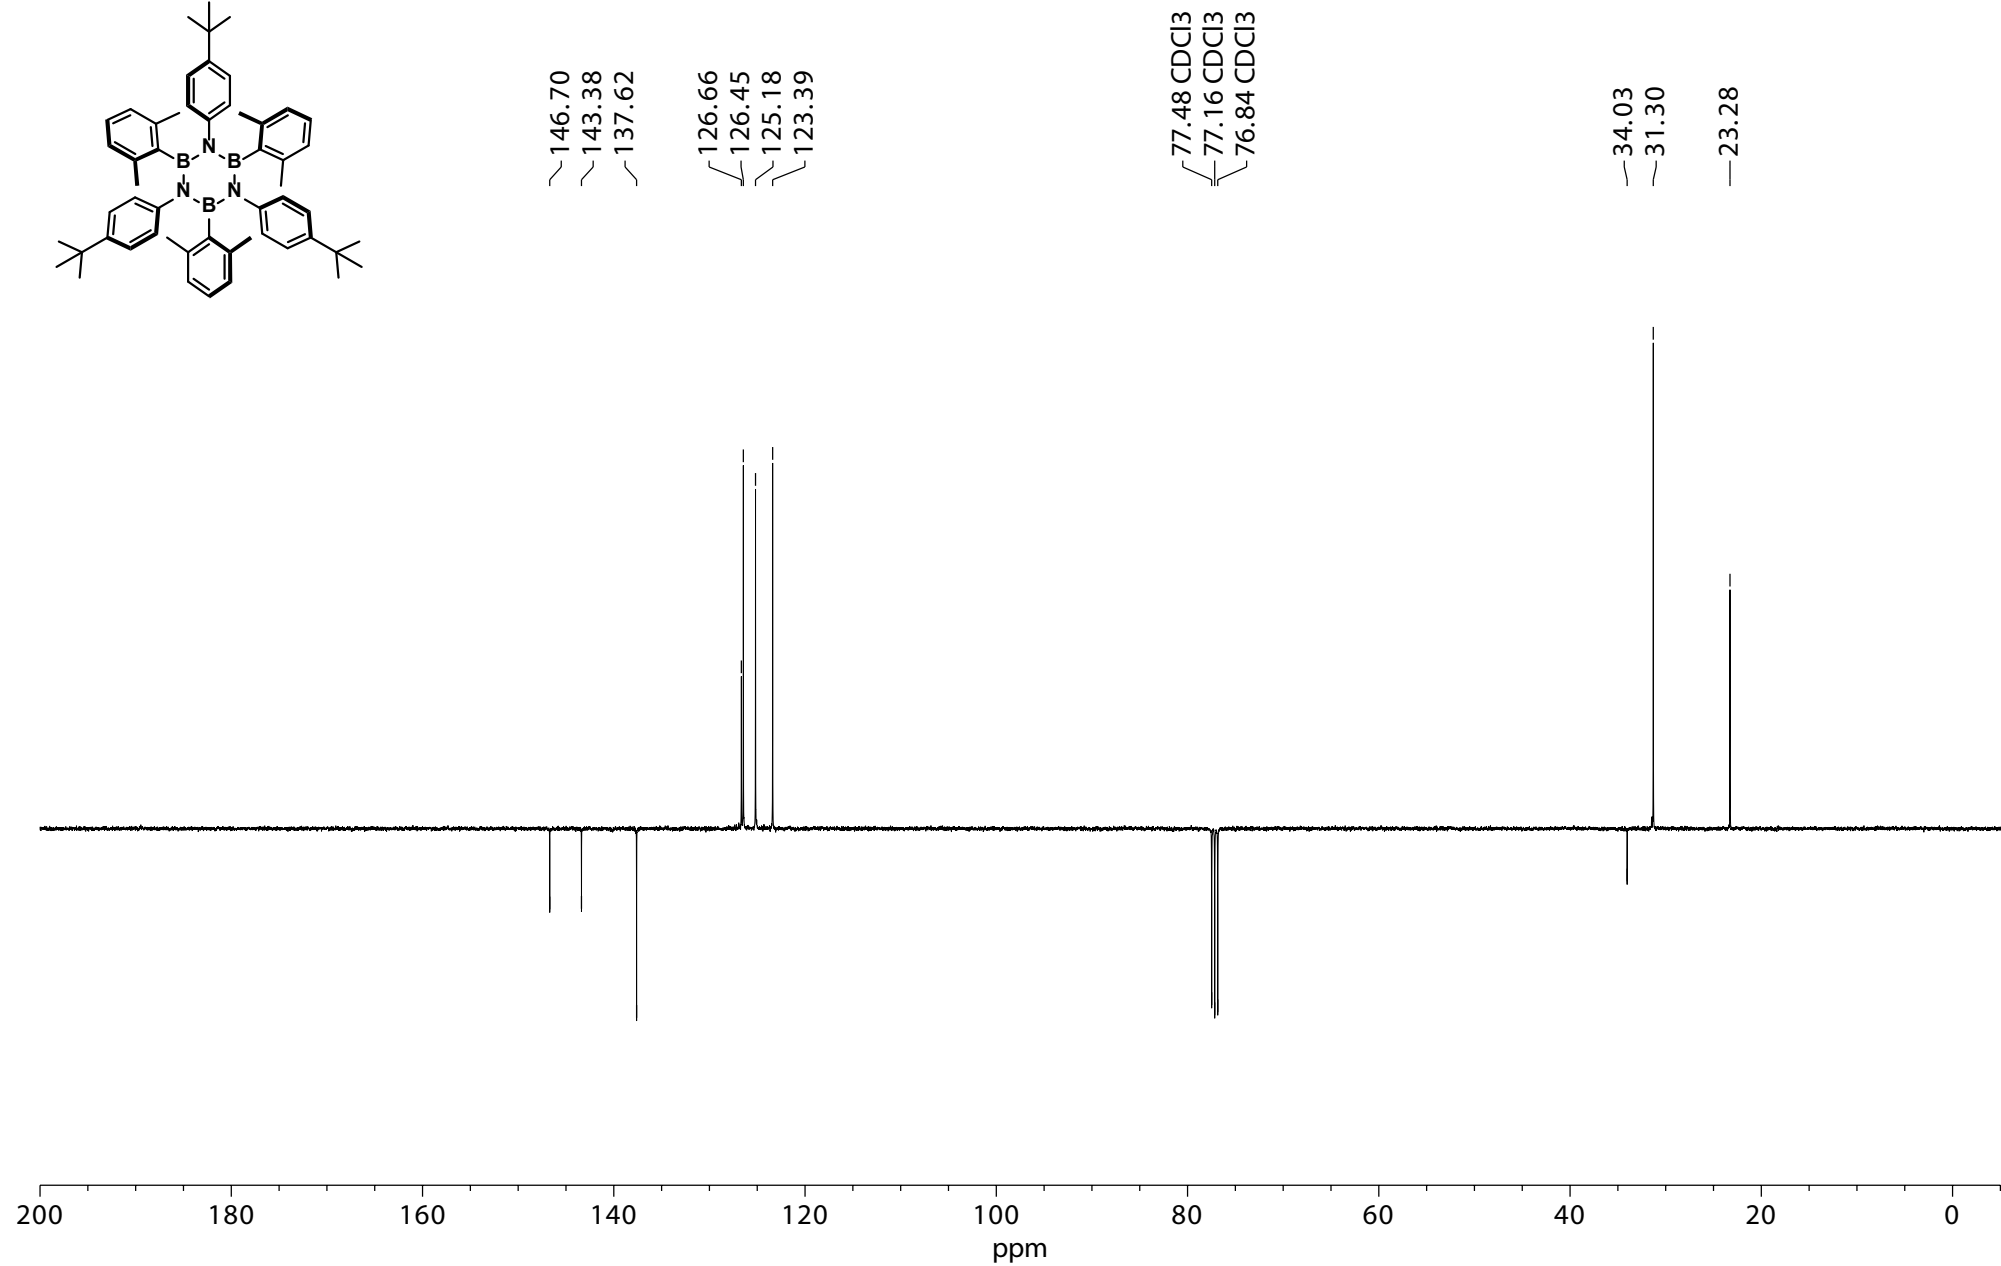

B,B',B''-Tris(2,6-dimethylphenyl)-N,N',N''-tris(4-tbutylphenyl)borazine-(2)

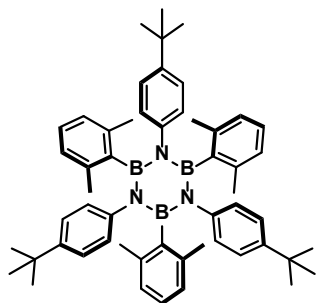

— 36.4

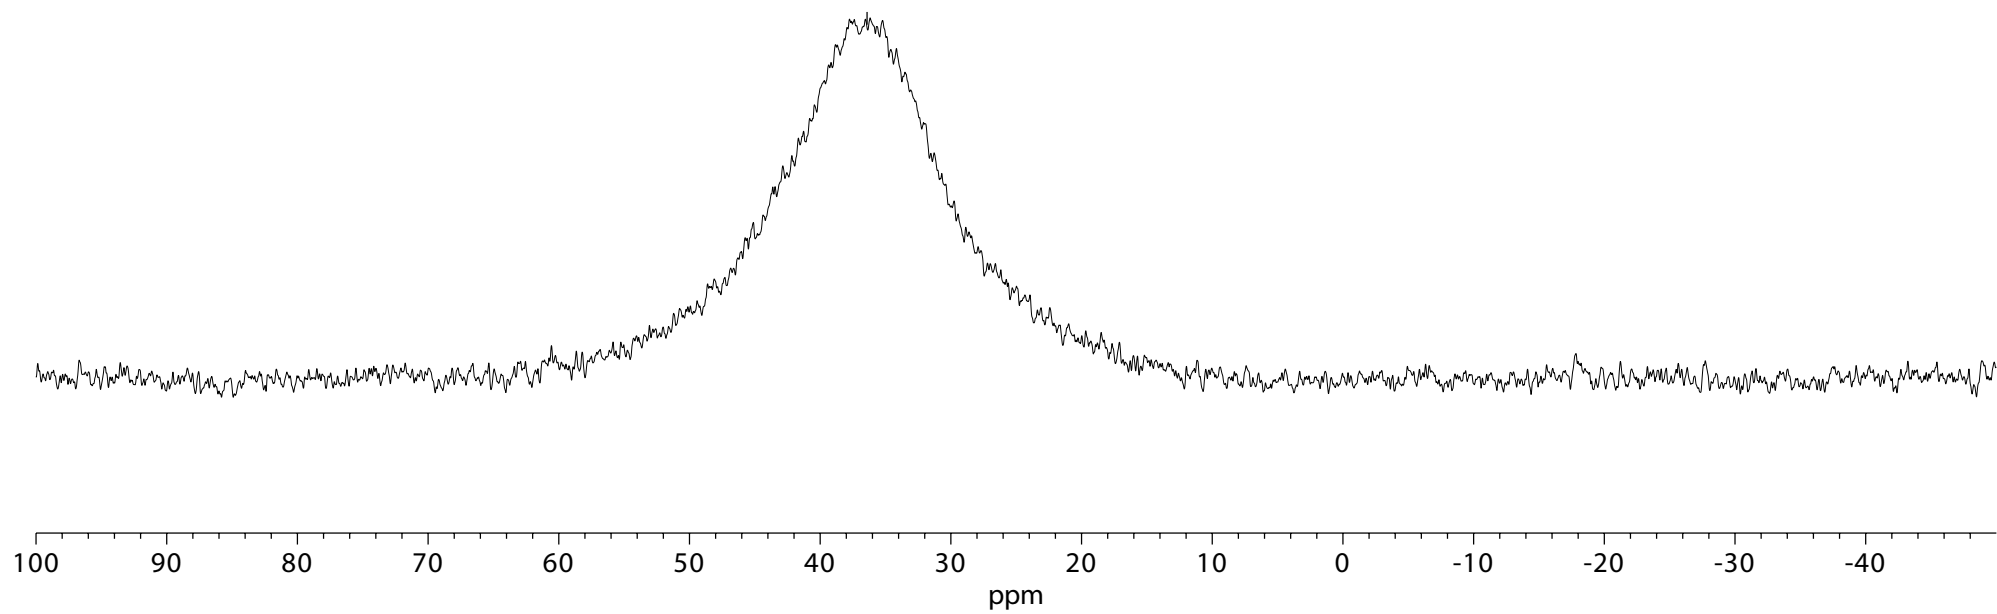

B,B',B''-Tris(2,4,6-trimethylphenyl)-N,N',N''-tris(4-tertbutylphenyl)borazine-(3)

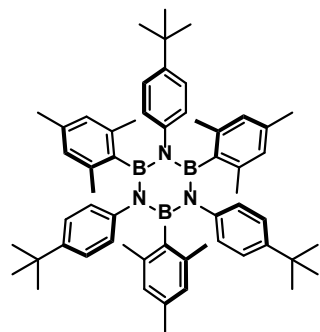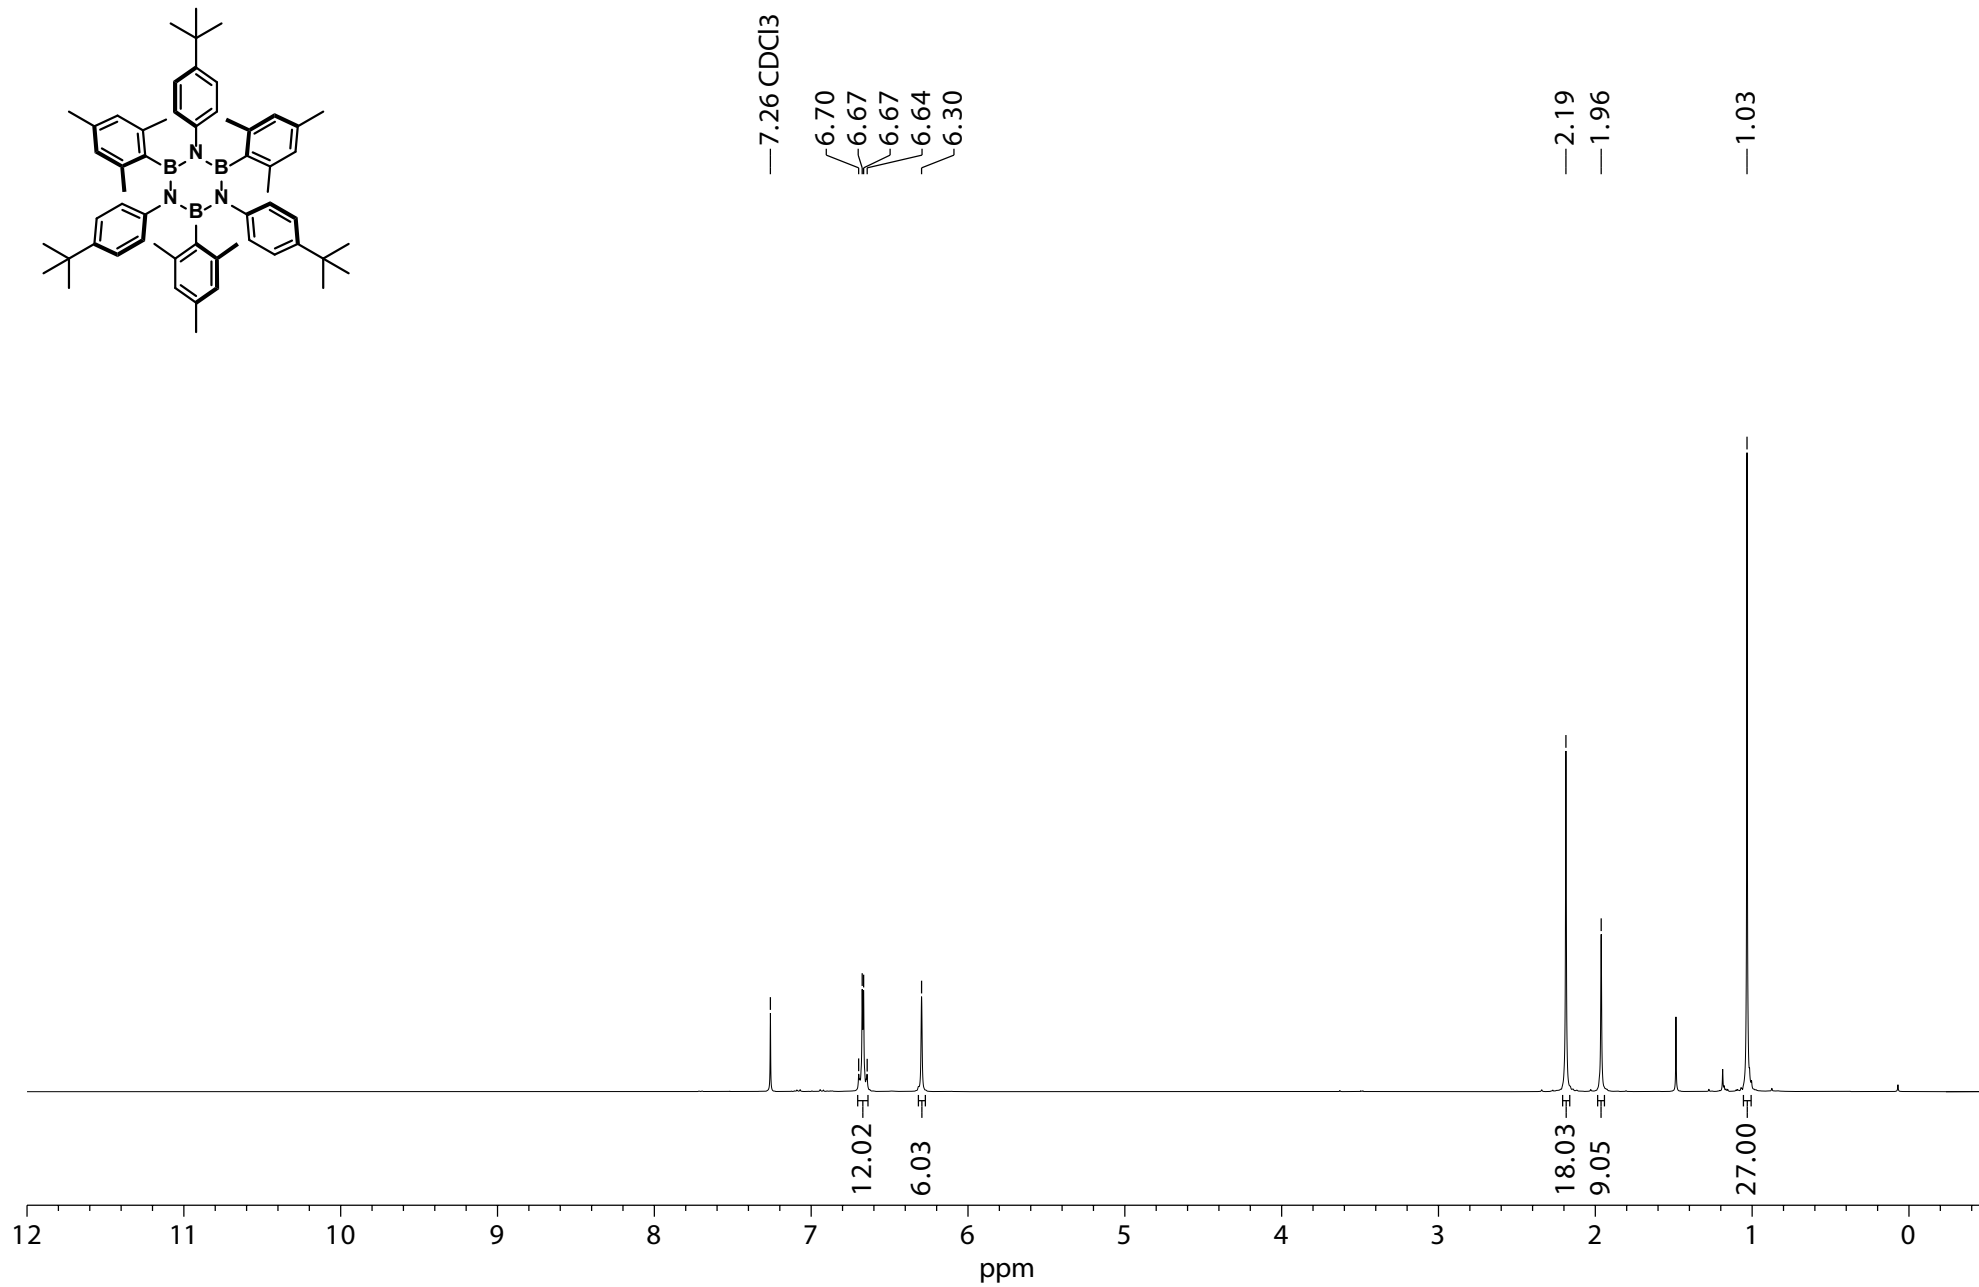

B,B',B''-Tris(2,4,6-trimethylphenyl)-N,N',N''-tris(4-tertbutylphenyl)borazine-(3)



~146.40  
~143.71  
~137.57  
~135.66

~126.49  
~126.00  
~123.32

77.48 CDCl3  
77.16 CDCl3  
76.84 CDCl3

~34.03  
~31.33

~23.15  
~21.00

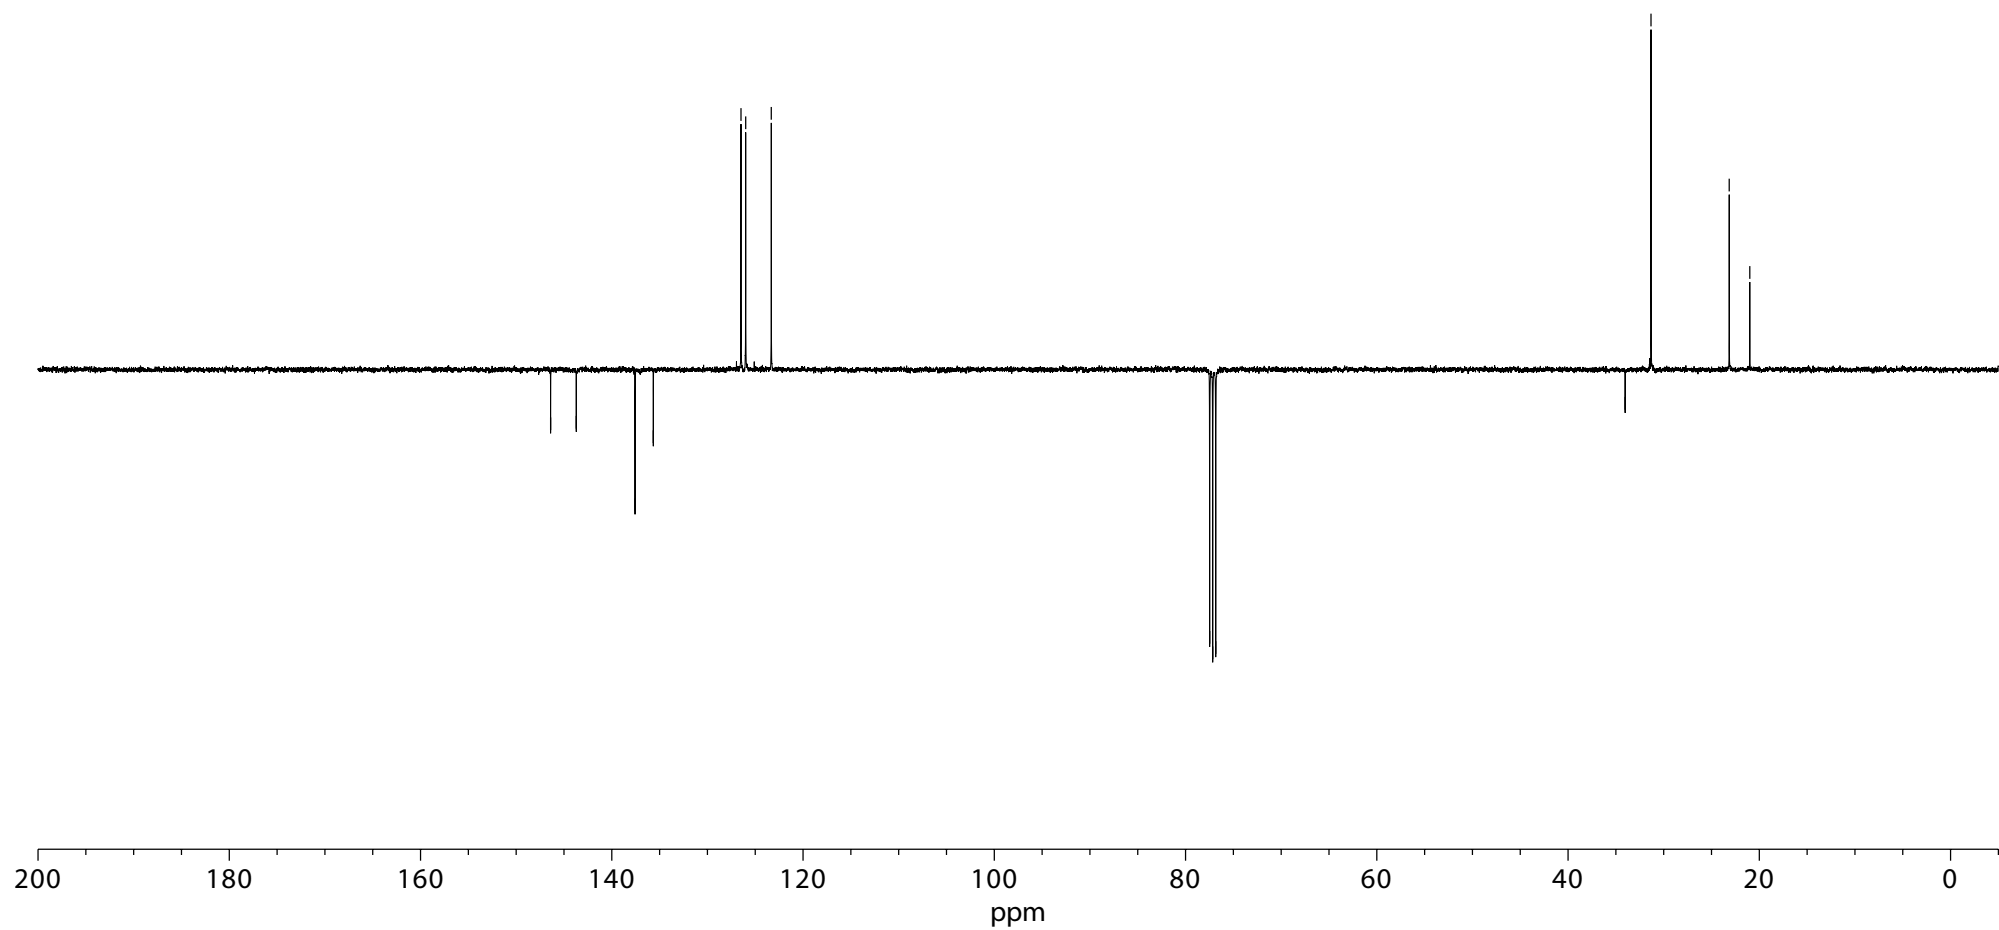

B,B',B''-Tris(2,4,6-trimethylphenyl)-N,N',N''-tris(4-tertbutylphenyl)borazine-(3)



—36.6

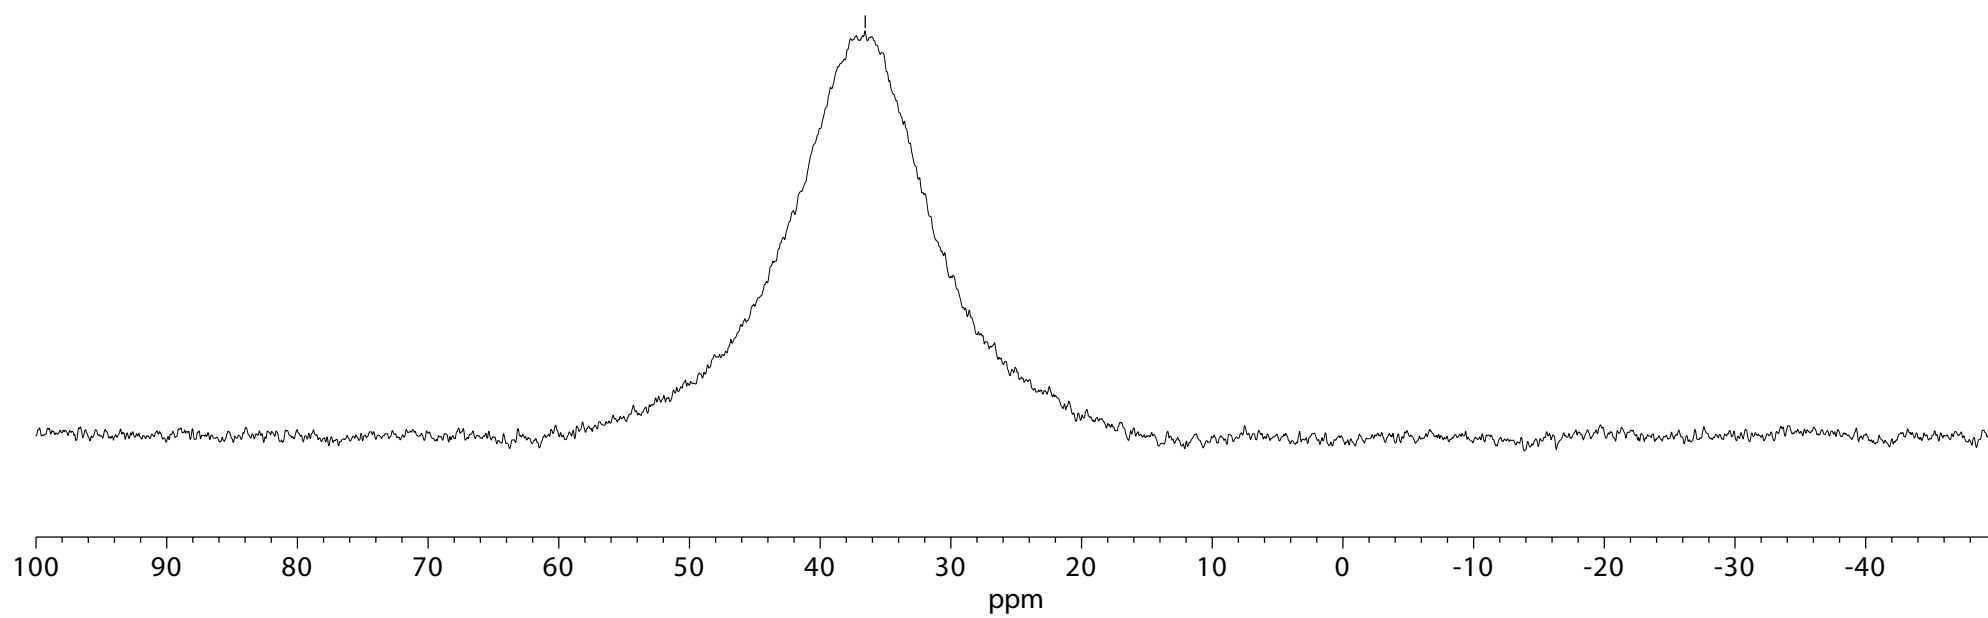

B,B',B''-Tris(2,3,5,6-tetramethylphenyl)-N,N',N''-tris(4-tertbutylphenyl)borazine-(4)

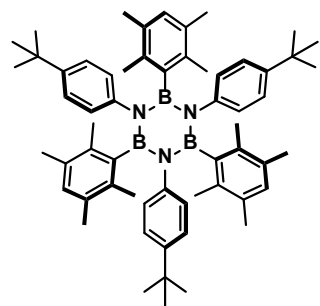

— 7.26 CDCl<sub>3</sub>

6.64  
6.62  
6.61  
6.59  
6.39

— 2.12

— 1.85

— 1.02

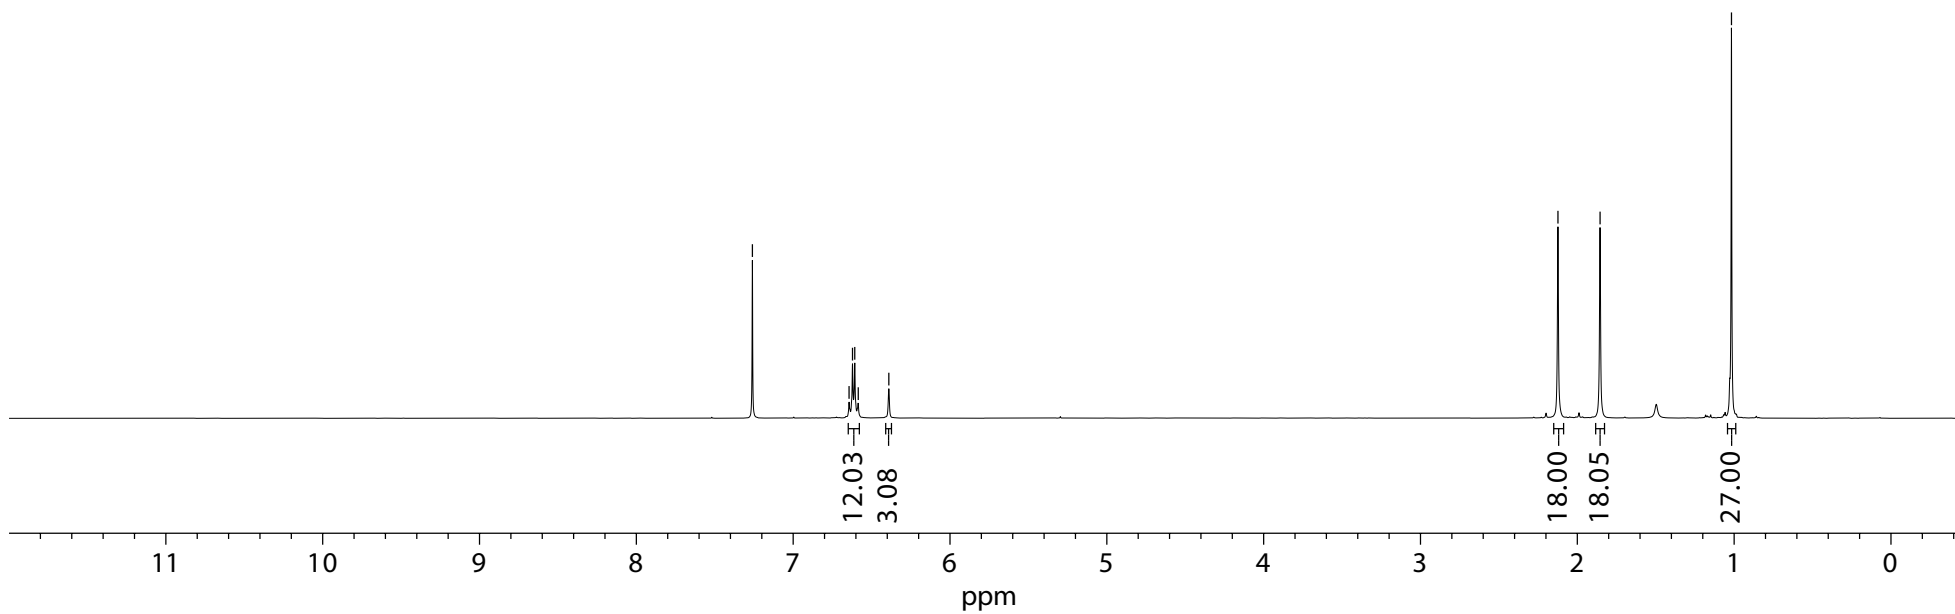



B,B',B''-Tris(2,3,5,6-tetramethylphenyl)-N,N',N''-tris(4-tertbutylphenyl)borazine-(4)



~146.13  
~143.84

~133.35  
~131.74  
~129.60  
~126.51  
~123.11

77.48 CDCl3  
77.16 CDCl3  
76.84 CDCl3

~34.01  
~31.28

~21.00  
~19.42

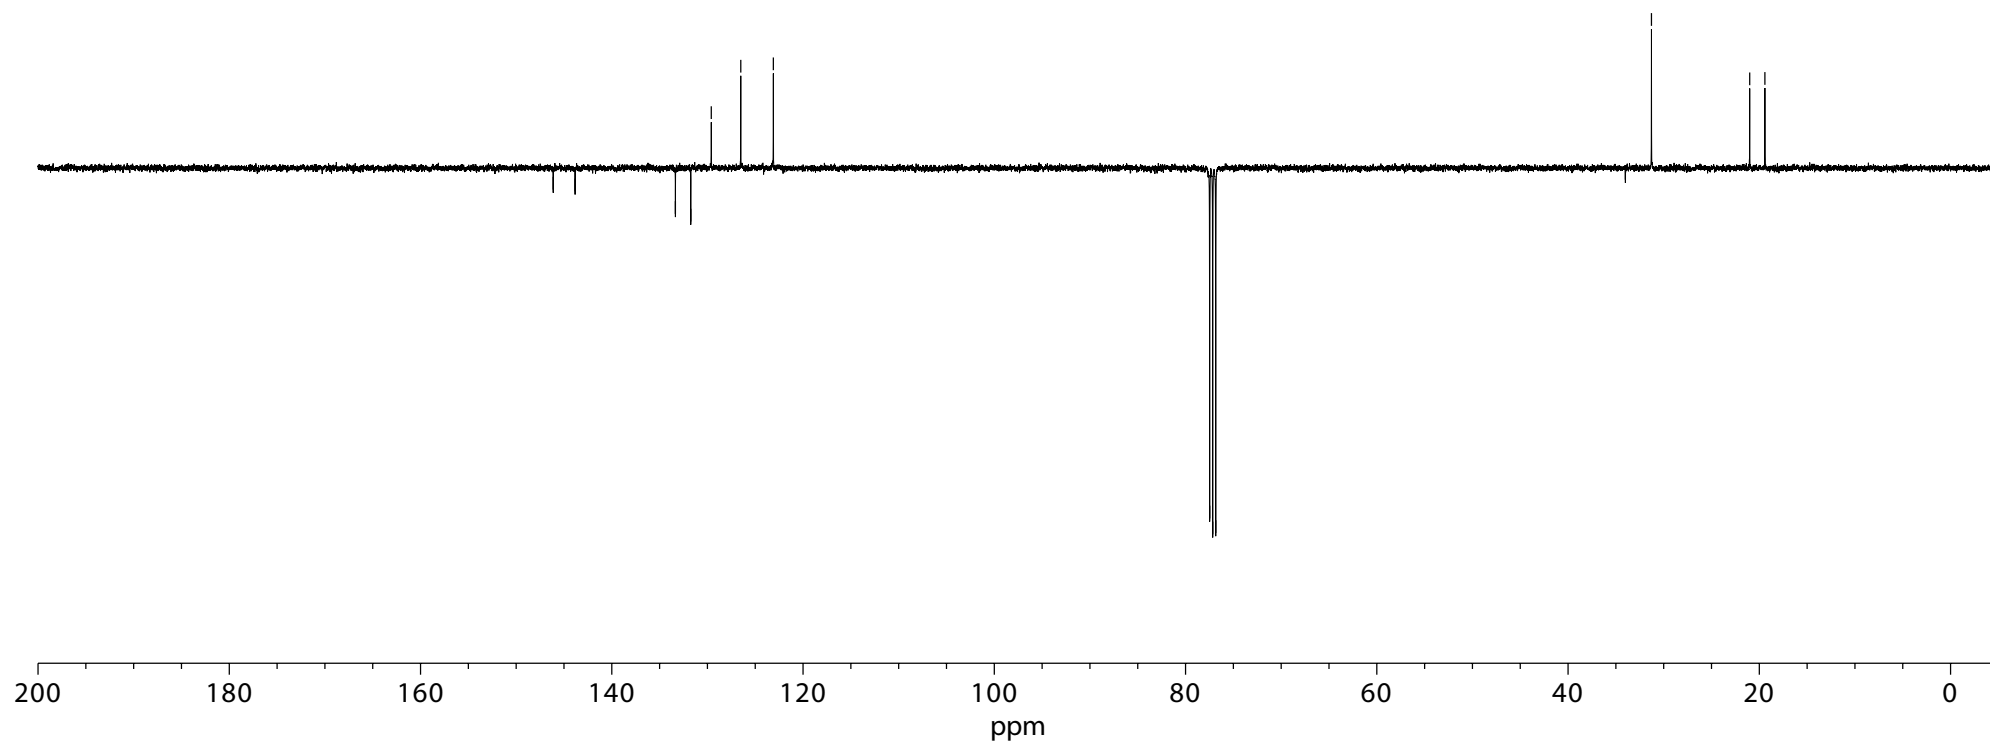

B,B',B''-Tris(2,3,5,6-tetramethylphenyl)-N,N',N''-tris(4-tertbutylphenyl)borazine-(4)

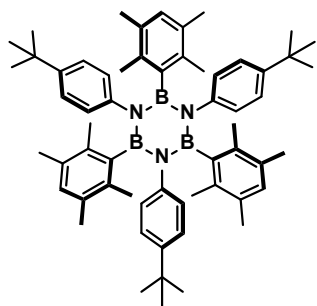

—36.5

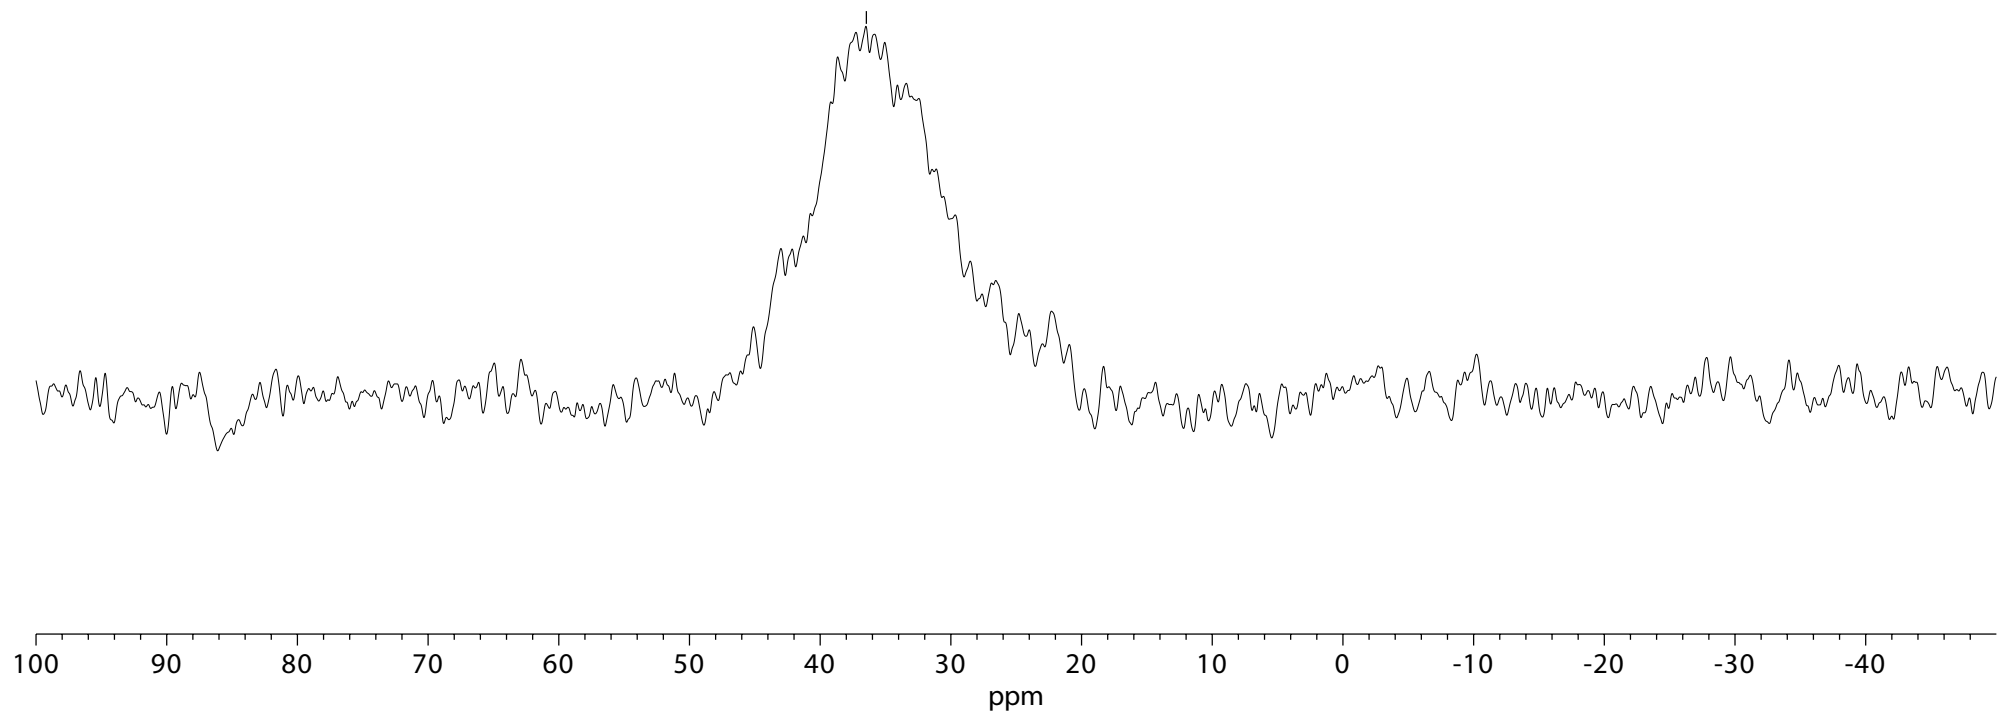

B,B',B''-Tris(2,4,6-trimethylphenyl)-N,N',N''-tris(4-isopropylphenyl)borazine-(5)

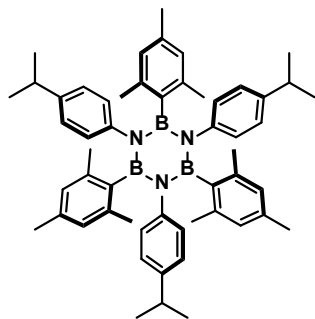

— 7.26 CDCl<sub>3</sub>

6.69  
6.67  
6.56  
6.54  
6.31

2.61  
2.59  
2.58  
2.56  
2.54  
2.52  
2.51  
2.20  
1.97

0.97  
0.95

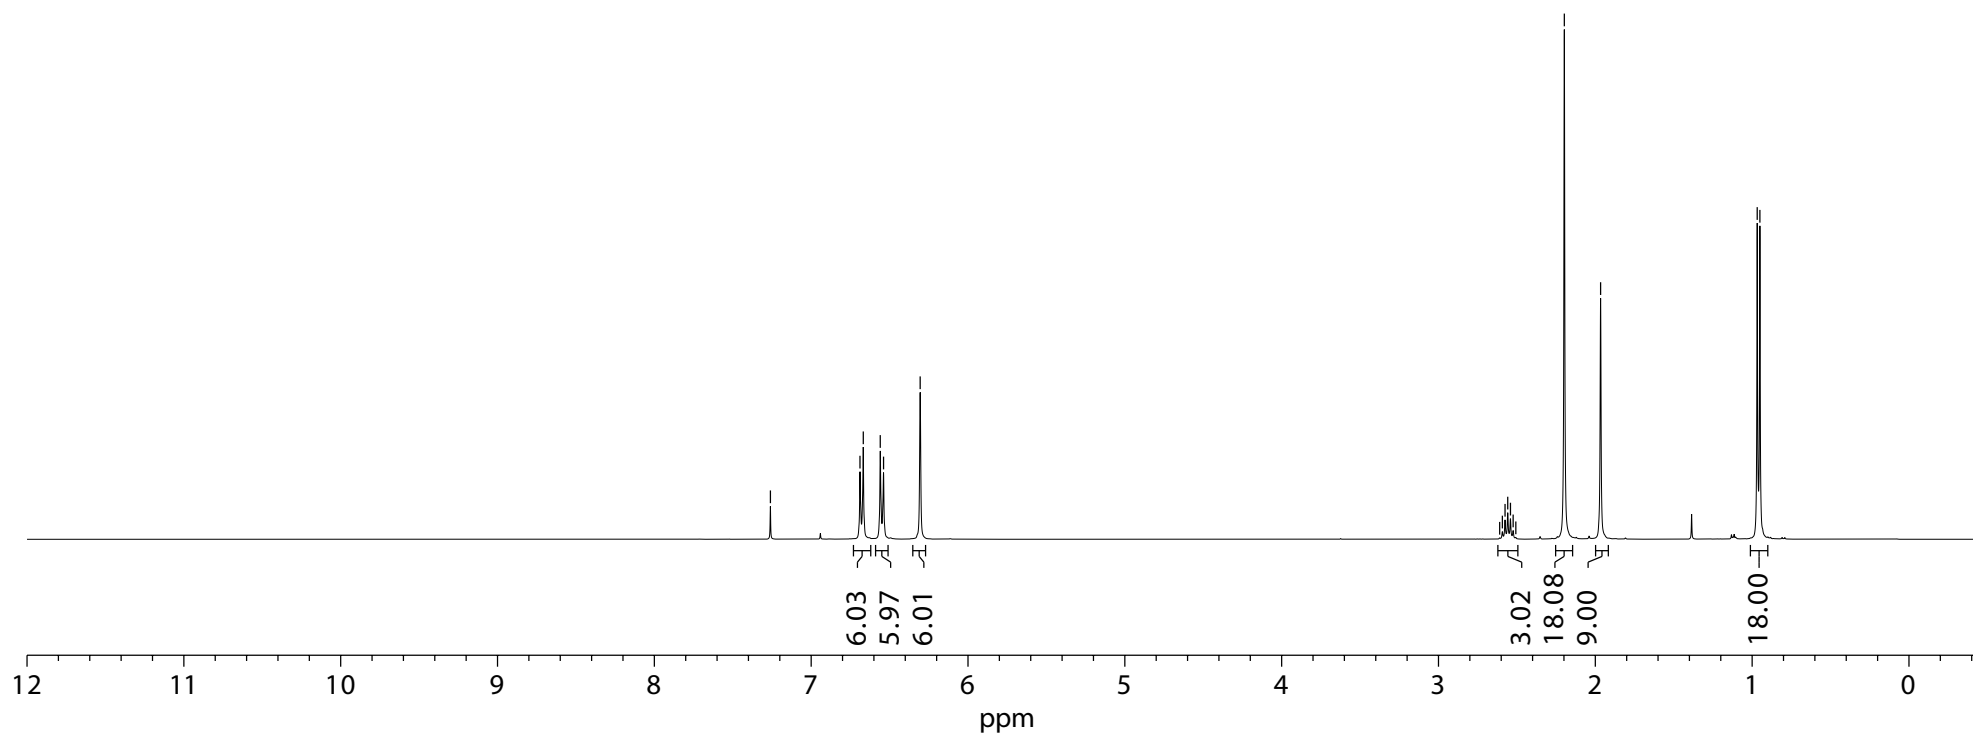

B,B',B''-Tris(2,4,6-trimethylphenyl)-N,N',N''-tris(4-isopropylphenyl)borazine-(5)

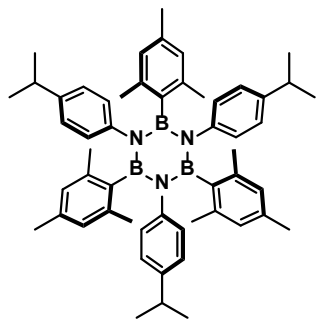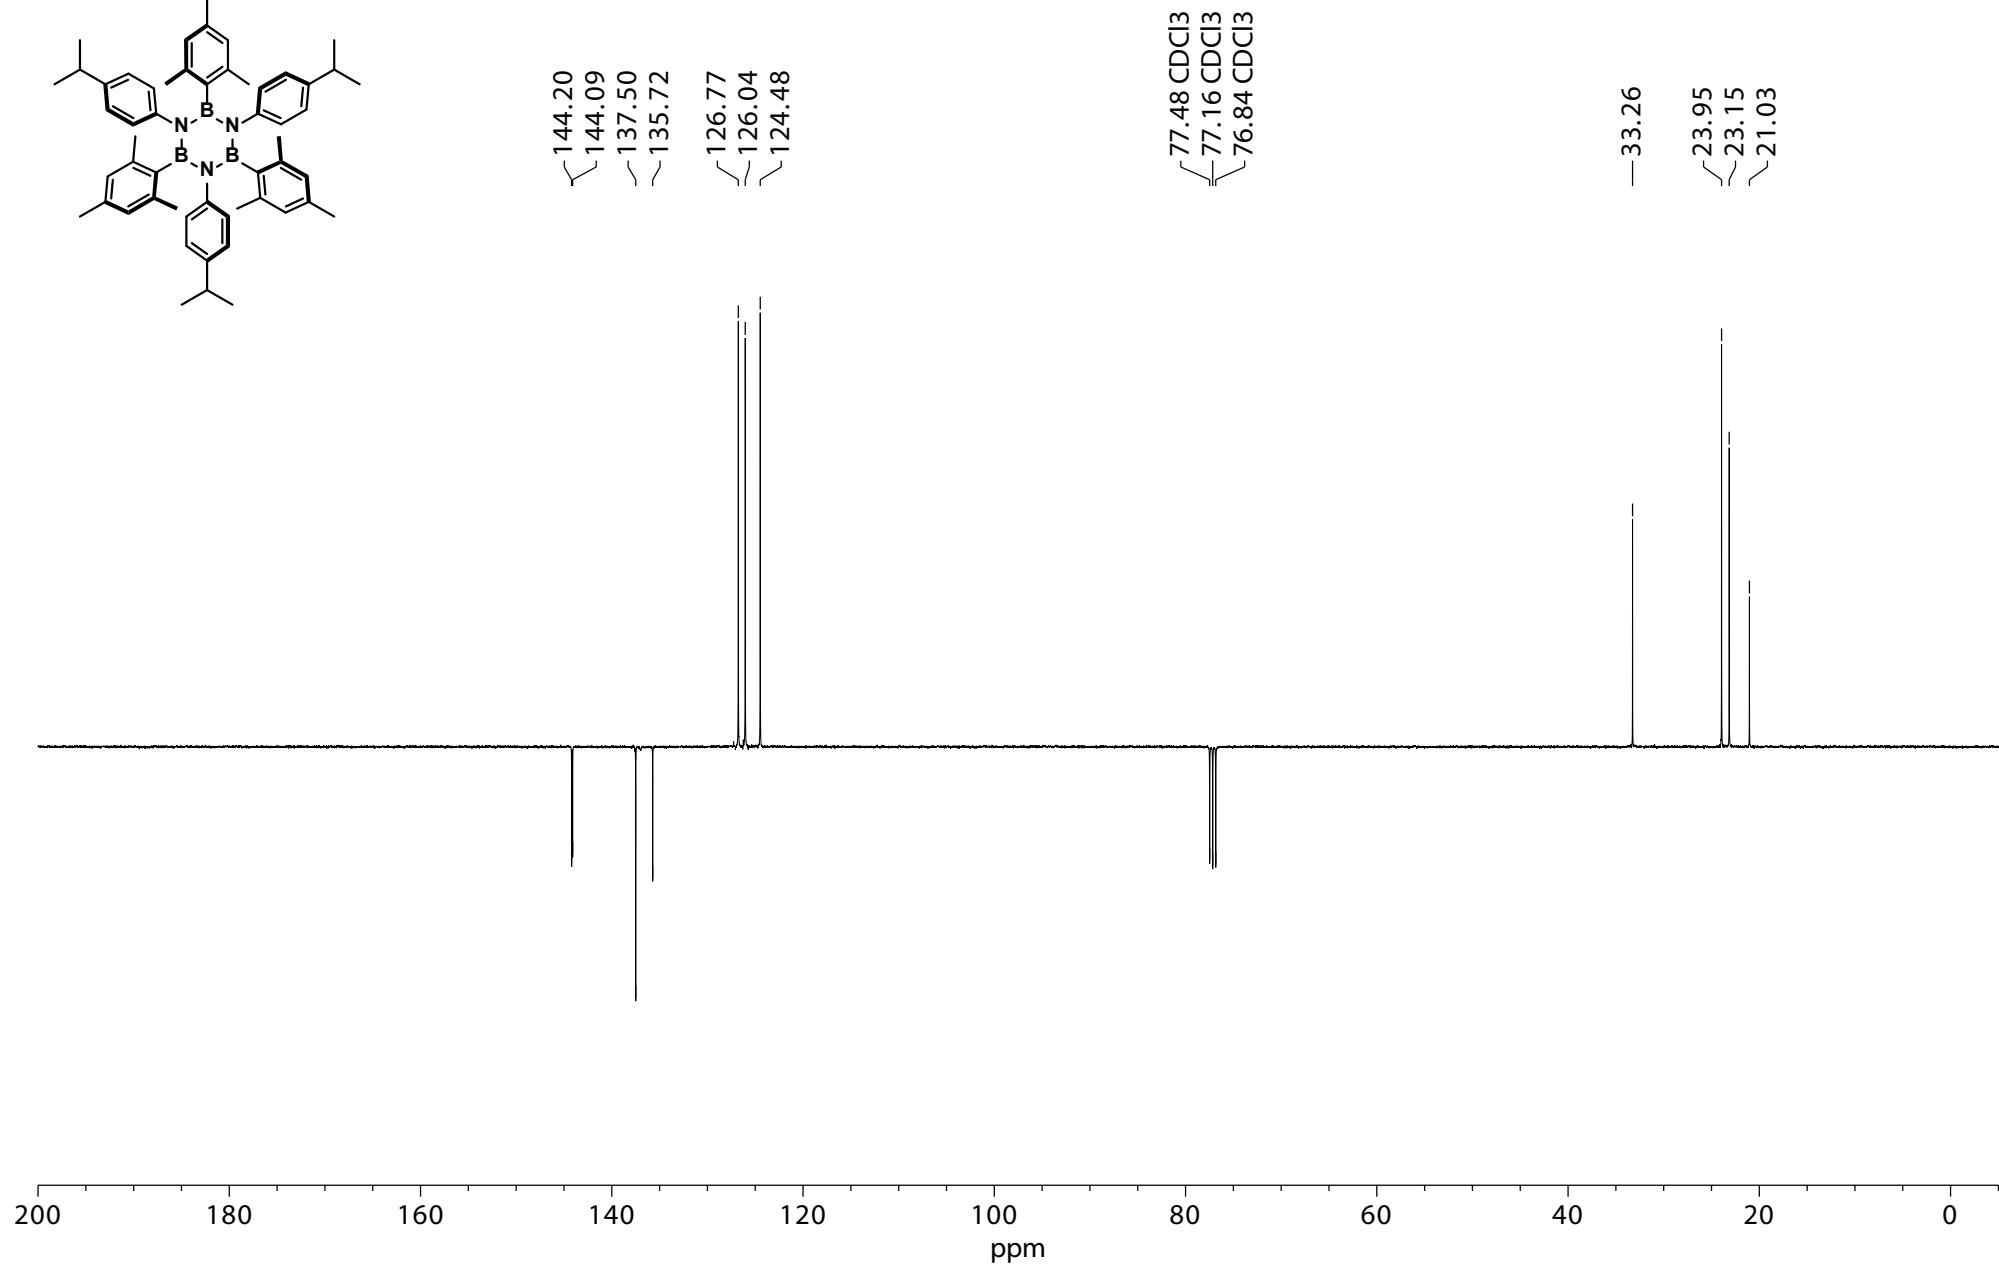

B,B',B''-Tris(2,4,6-trimethylphenyl)-N,N',N''-tris(4-isopropylphenyl)borazine-(5)



—37.2

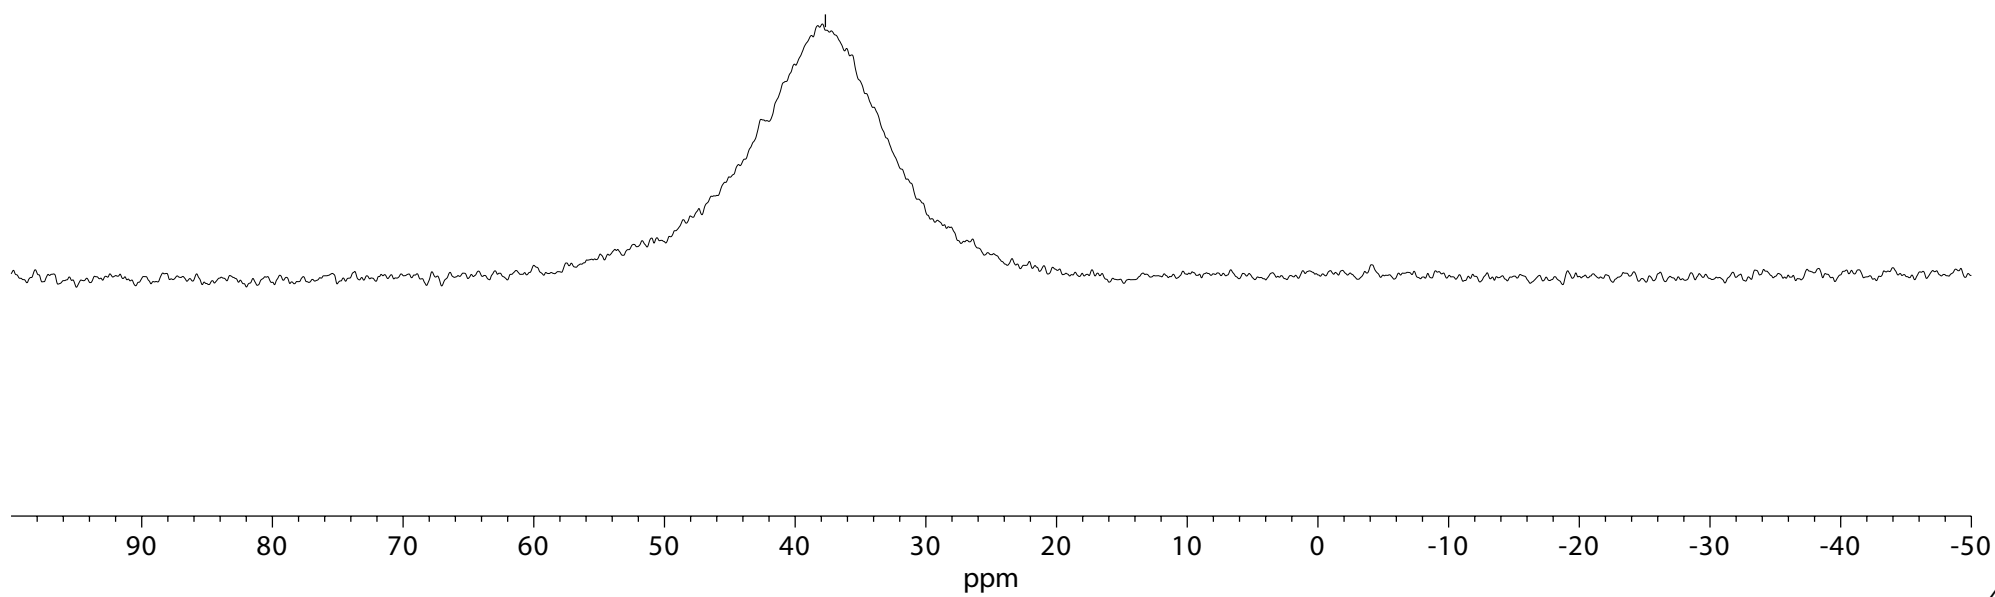

B,B',B''-Tris(2,4,6-trimethylphenyl)-N,N',N''-tris(phenyl)borazine-(6)

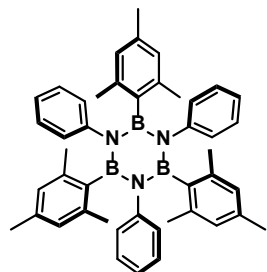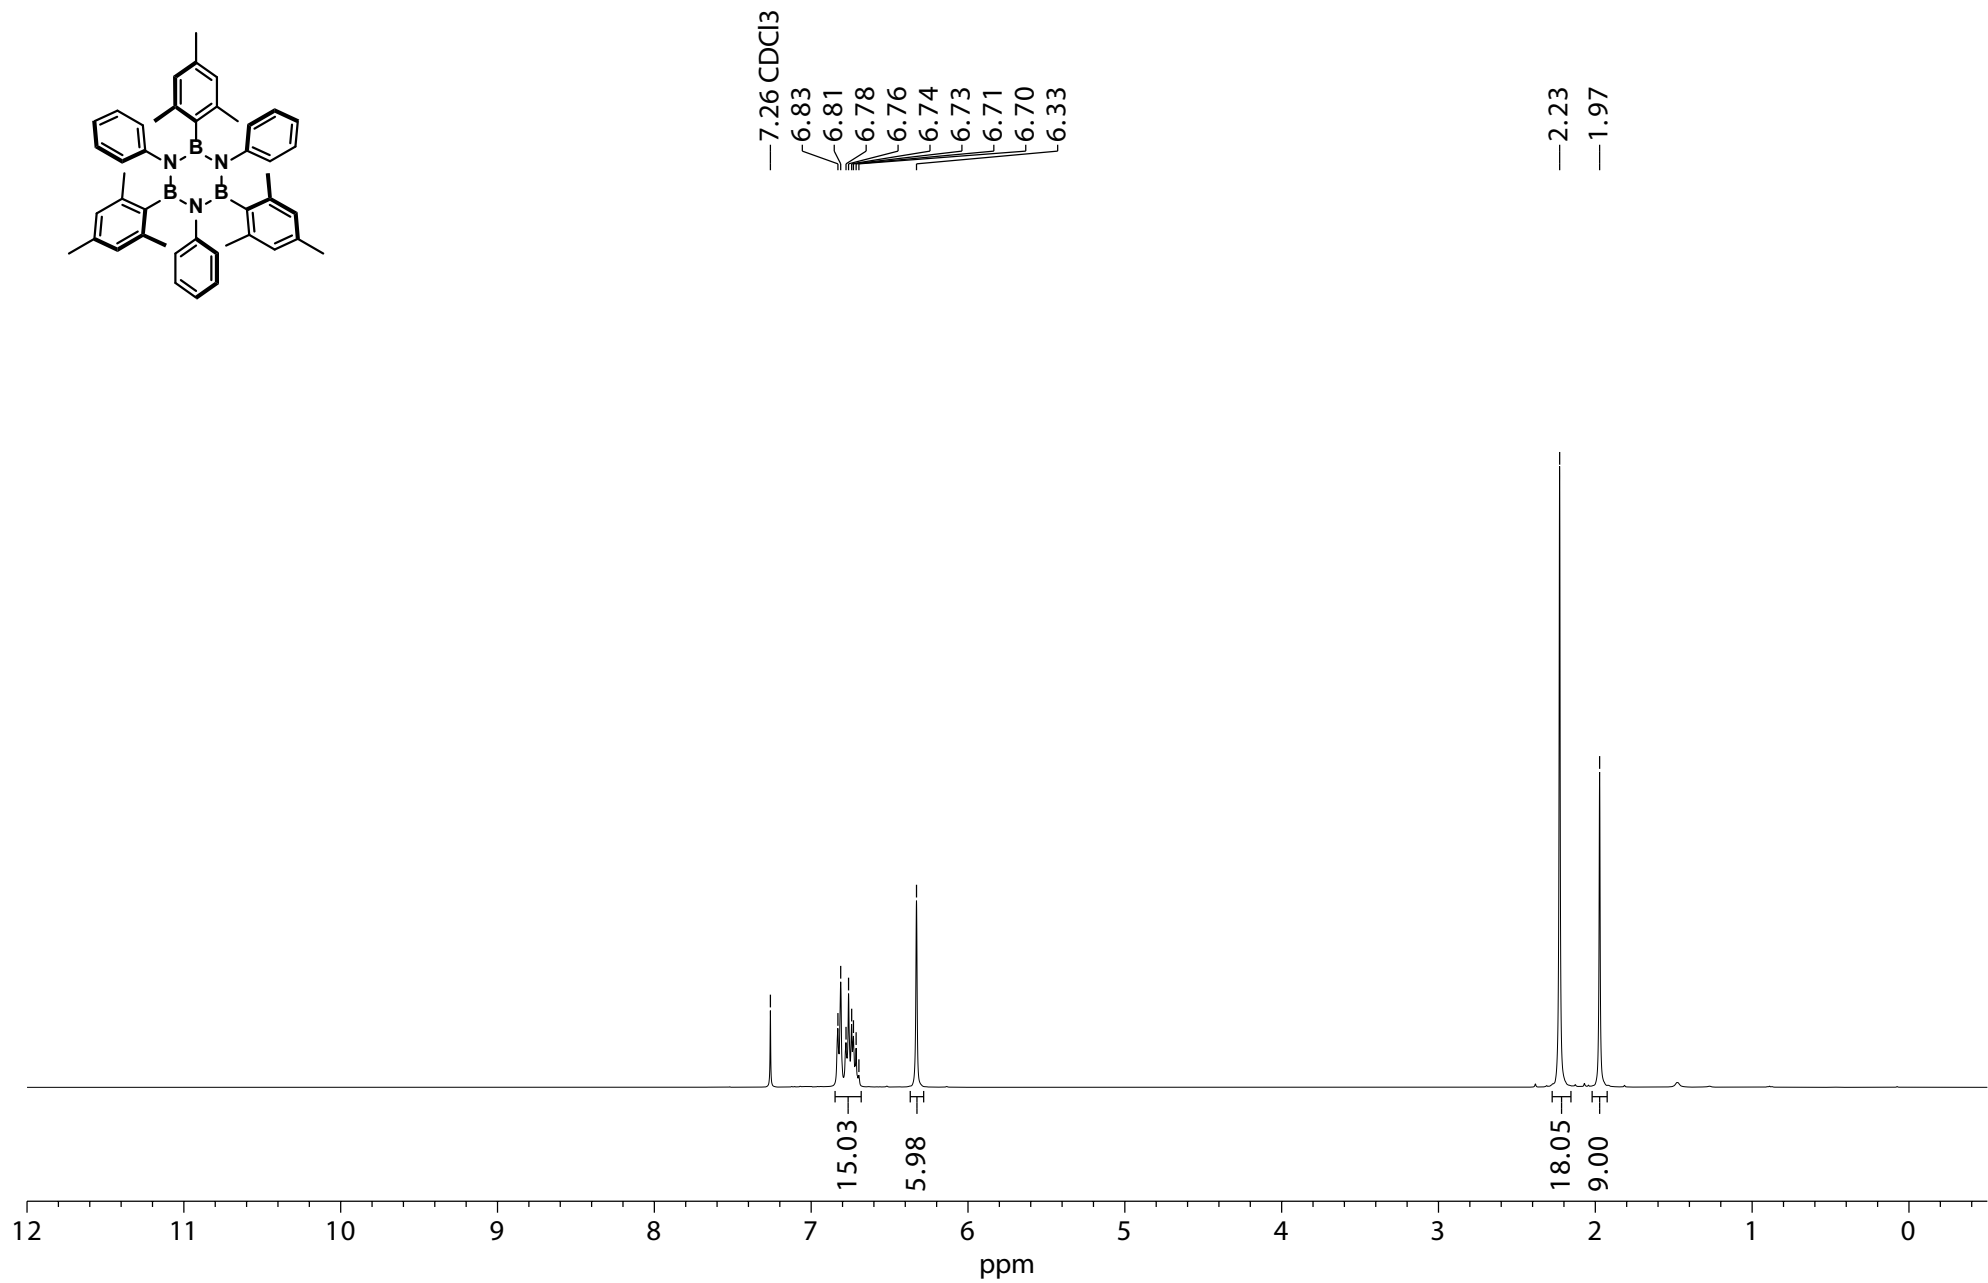

B,B',B''-Tris(2,4,6-trimethylphenyl)-N,N',N''-tris(phenyl)borazine-(6)



— 146.43

~ 137.37

~ 136.18

~ 127.13

~ 126.81

~ 126.29

~ 124.28

~ 77.48 CDCl<sub>3</sub>

~ 77.16 CDCl<sub>3</sub>

~ 76.84 CDCl<sub>3</sub>

~ 23.13

~ 21.16

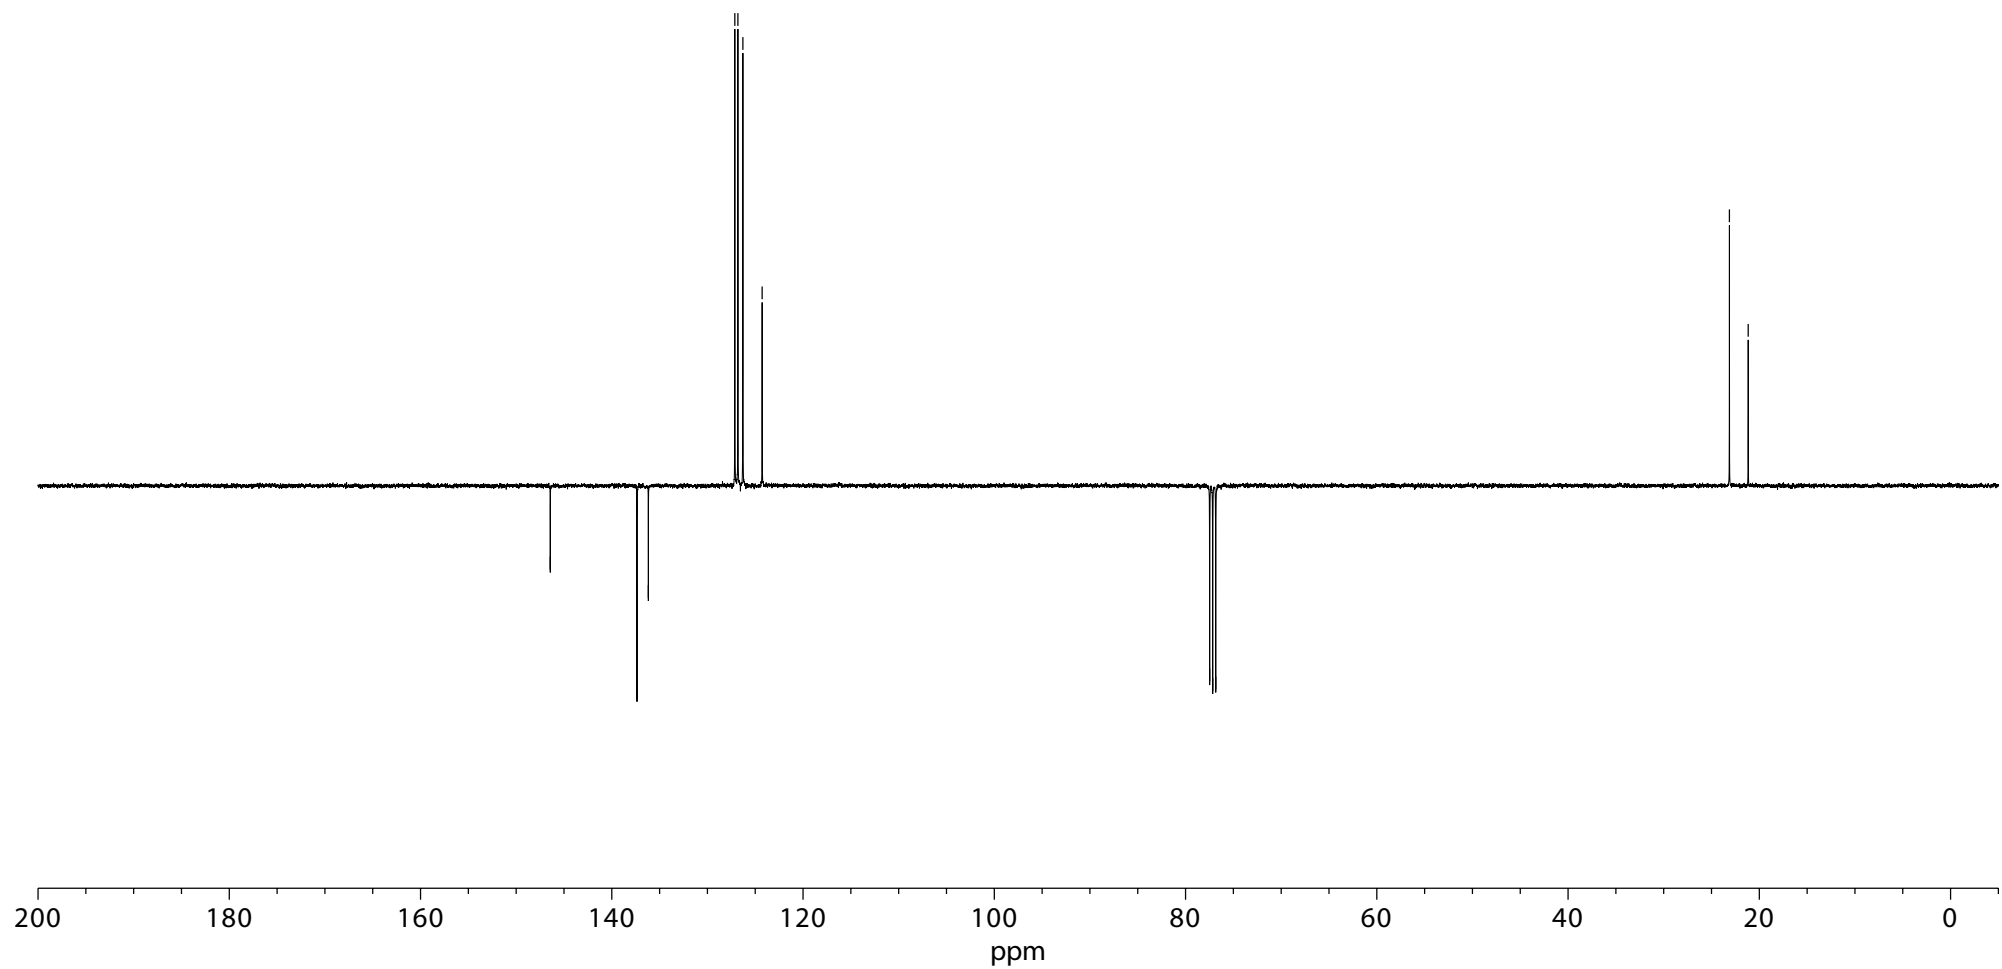

B,B',B''-Tris(2,4,6-trimethylphenyl)-N,N',N''-tris(phenyl)borazine-(6)



—36.9

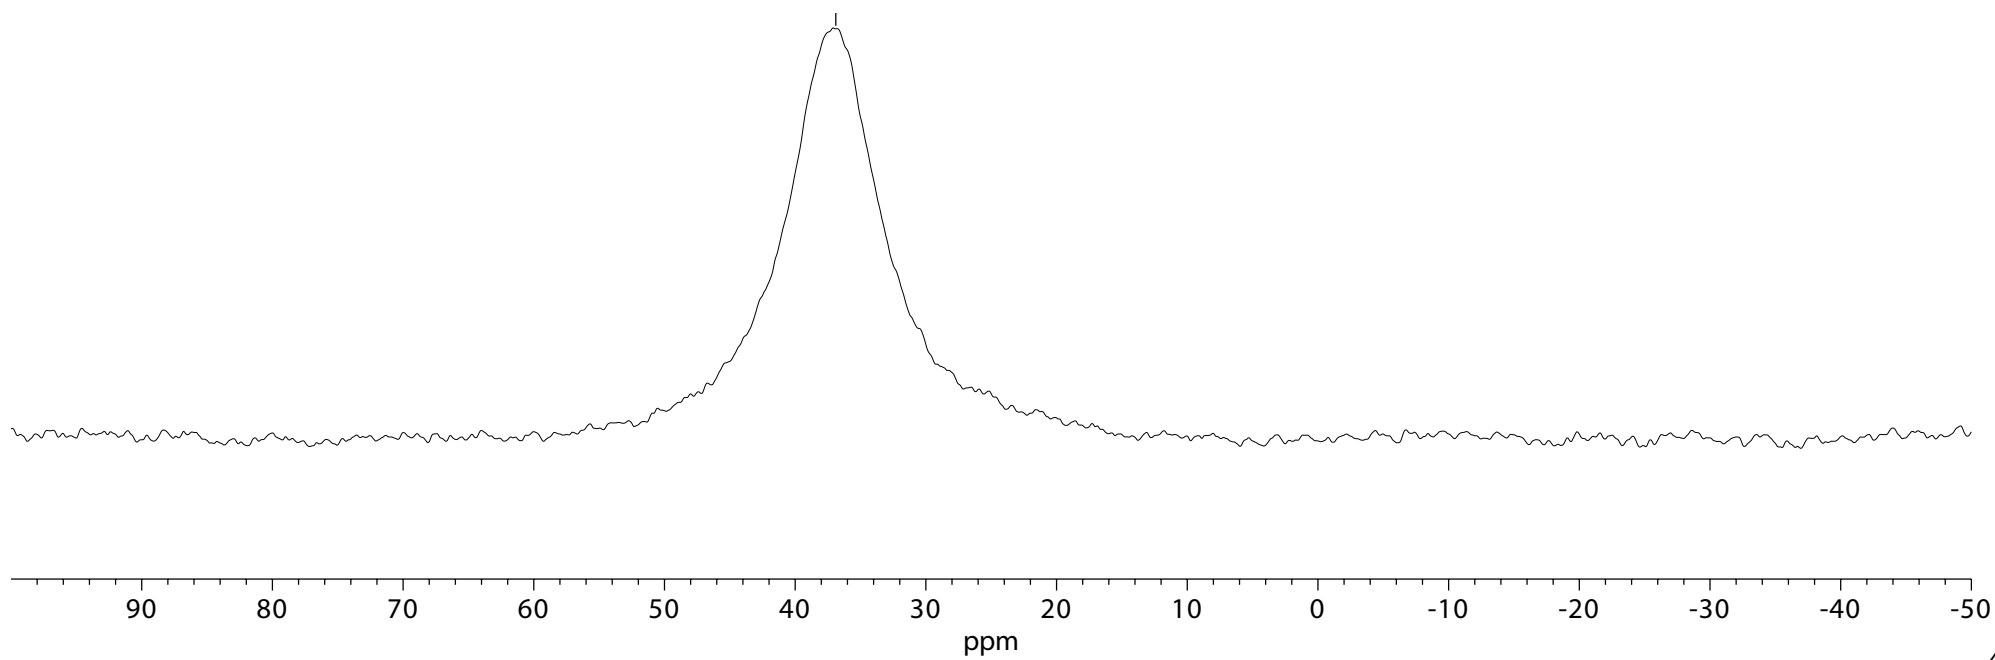



B,B',B''-Tris(2,6-dimethylphenyl)-N,N',N''-tris(4-isopropylphenyl)borazine-(7)

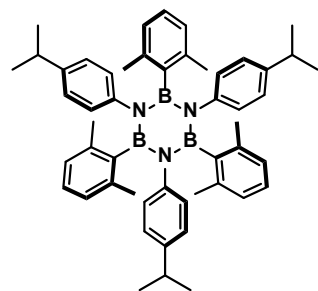

7.26 CDCl<sub>3</sub>  
6.71  
6.69  
6.67  
6.56  
6.54  
6.51  
6.49

2.58  
2.56  
2.54  
2.53  
2.51  
2.26

0.96  
0.94

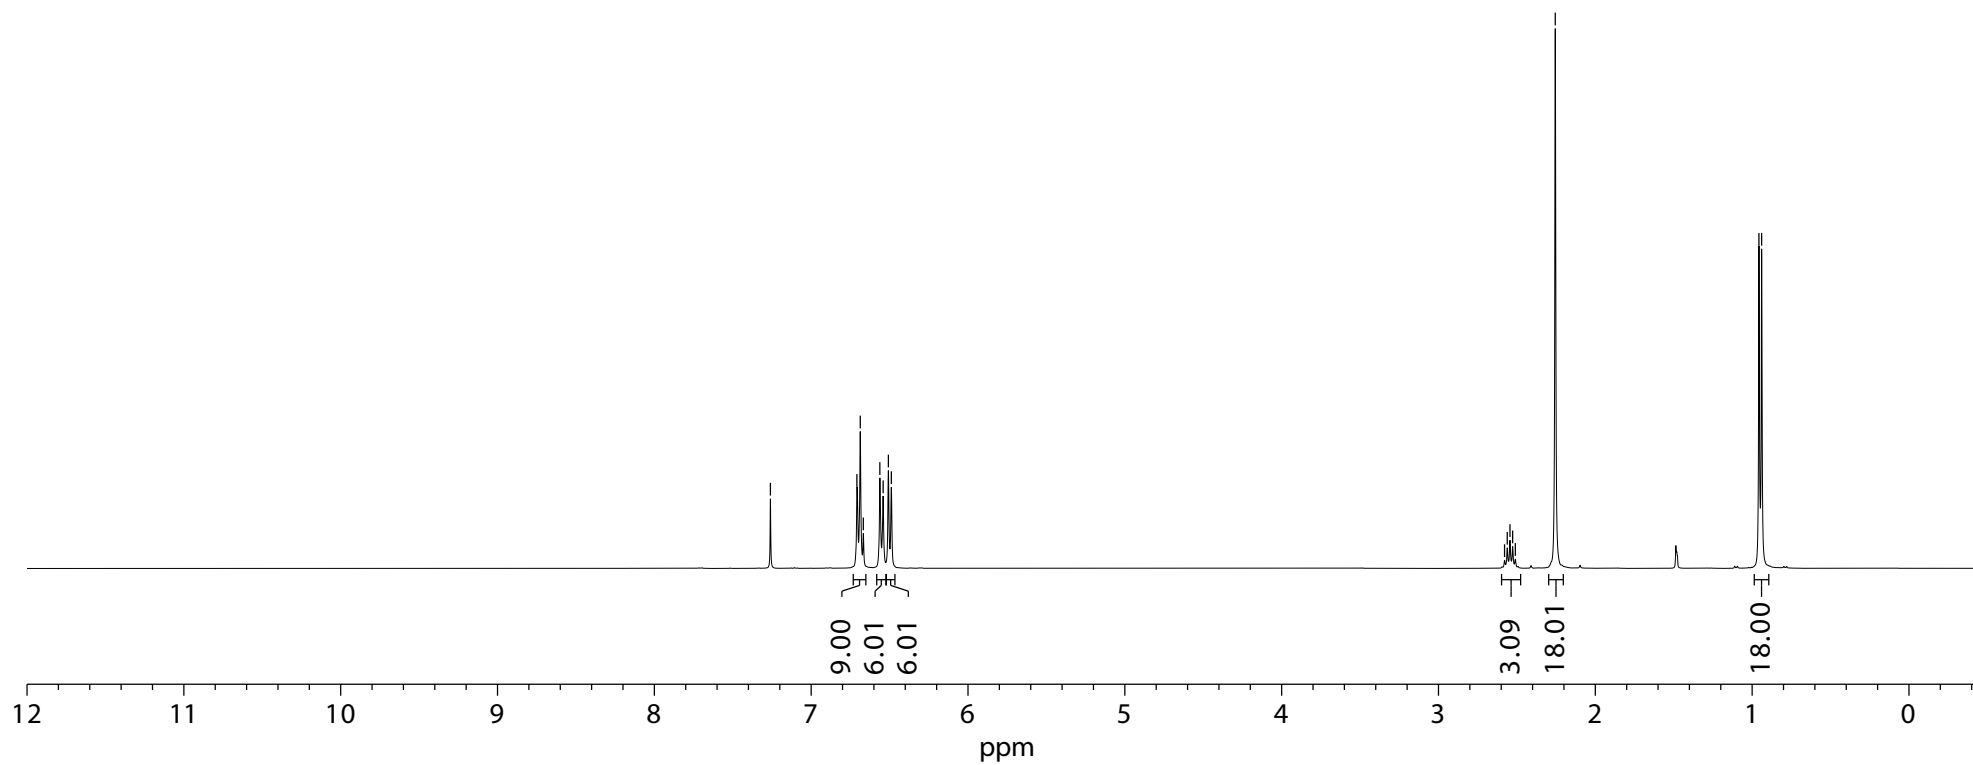

B,B',B''-Tris(2,6-dimethylphenyl)-N,N',N''-tris(4-isopropylphenyl)borazine-(7)

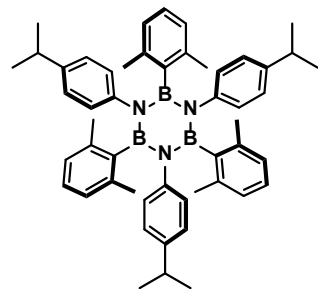

144.5  
143.7  
137.6  
126.7  
126.7  
125.2  
124.5

77.5 CDCl3  
77.2 CDCl3  
76.8 CDCl3

33.2  
23.9  
23.3

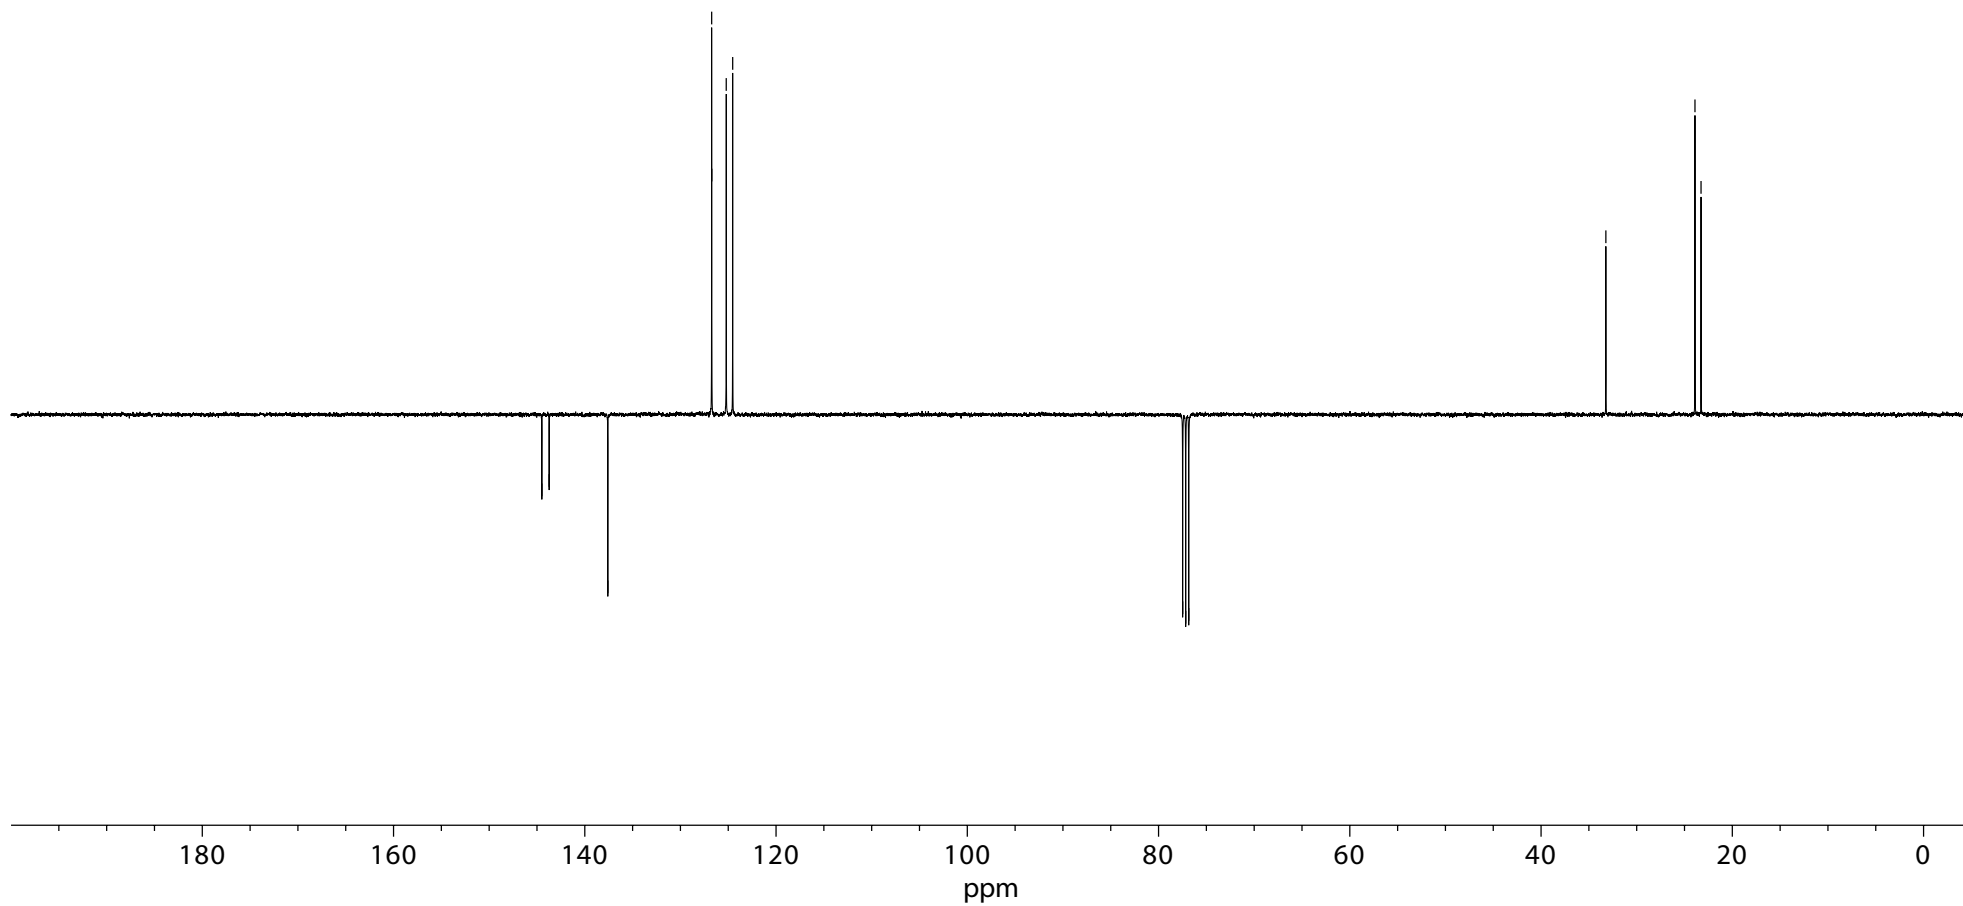

B,B',B''-Tris(2,6-dimethylphenyl)-N,N',N''-tris(4-isopropylphenyl)borazine-(7)



—36.9

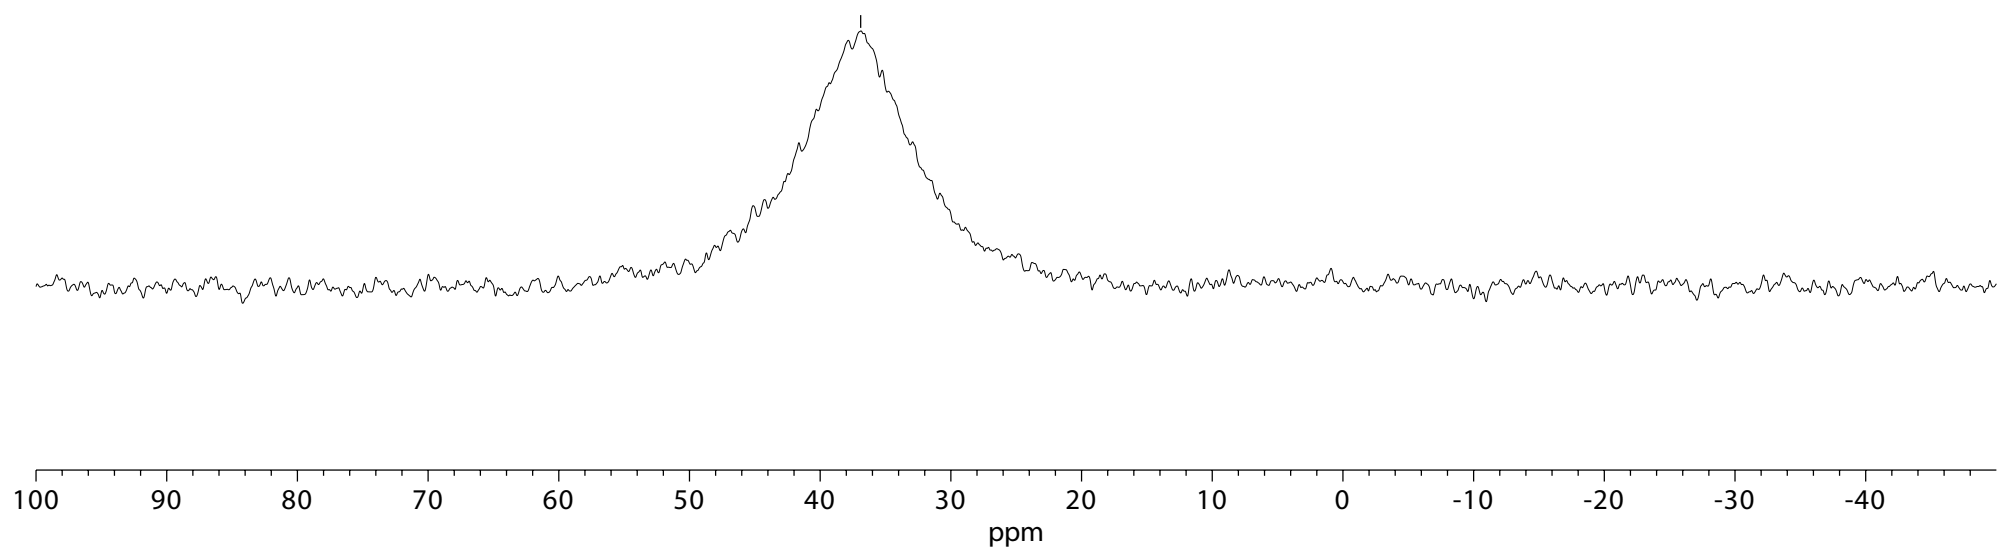

B,B',B''-Tris(4-((tert-butyl)dimethylsilyloxy)-2,6-dimethylphenyl)-N,N',N''-tris(3,5-dimethylphenyl)borazine-(8)

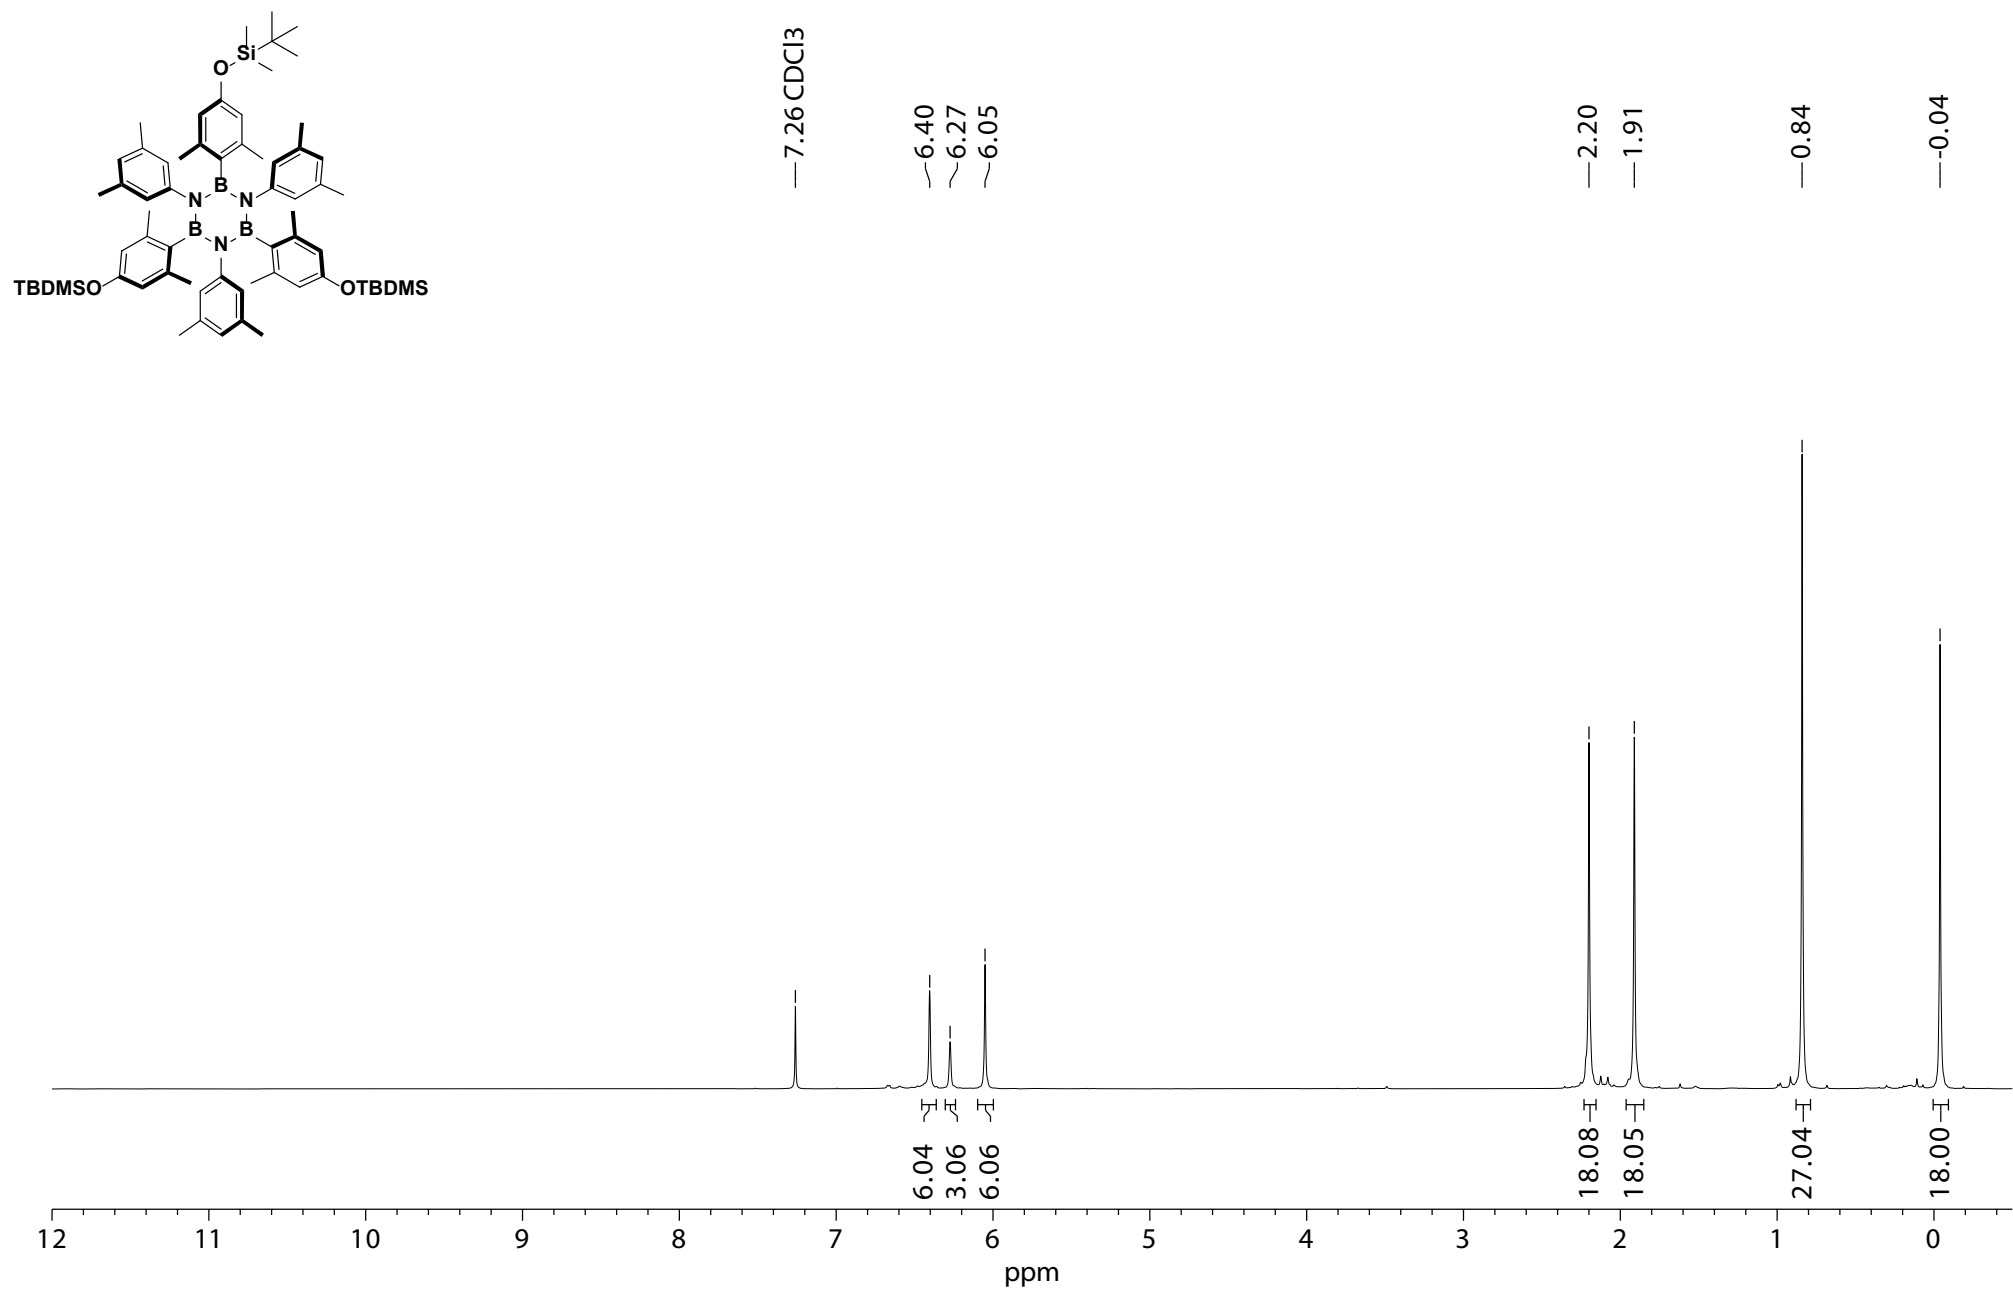

B,B',B''-Tris(4-((tert-butyldimethylsilyl)oxy)-2,6-dimethylphenyl)-N,N',N''-tris(3,5-dimethylphenyl)borazine-(8)

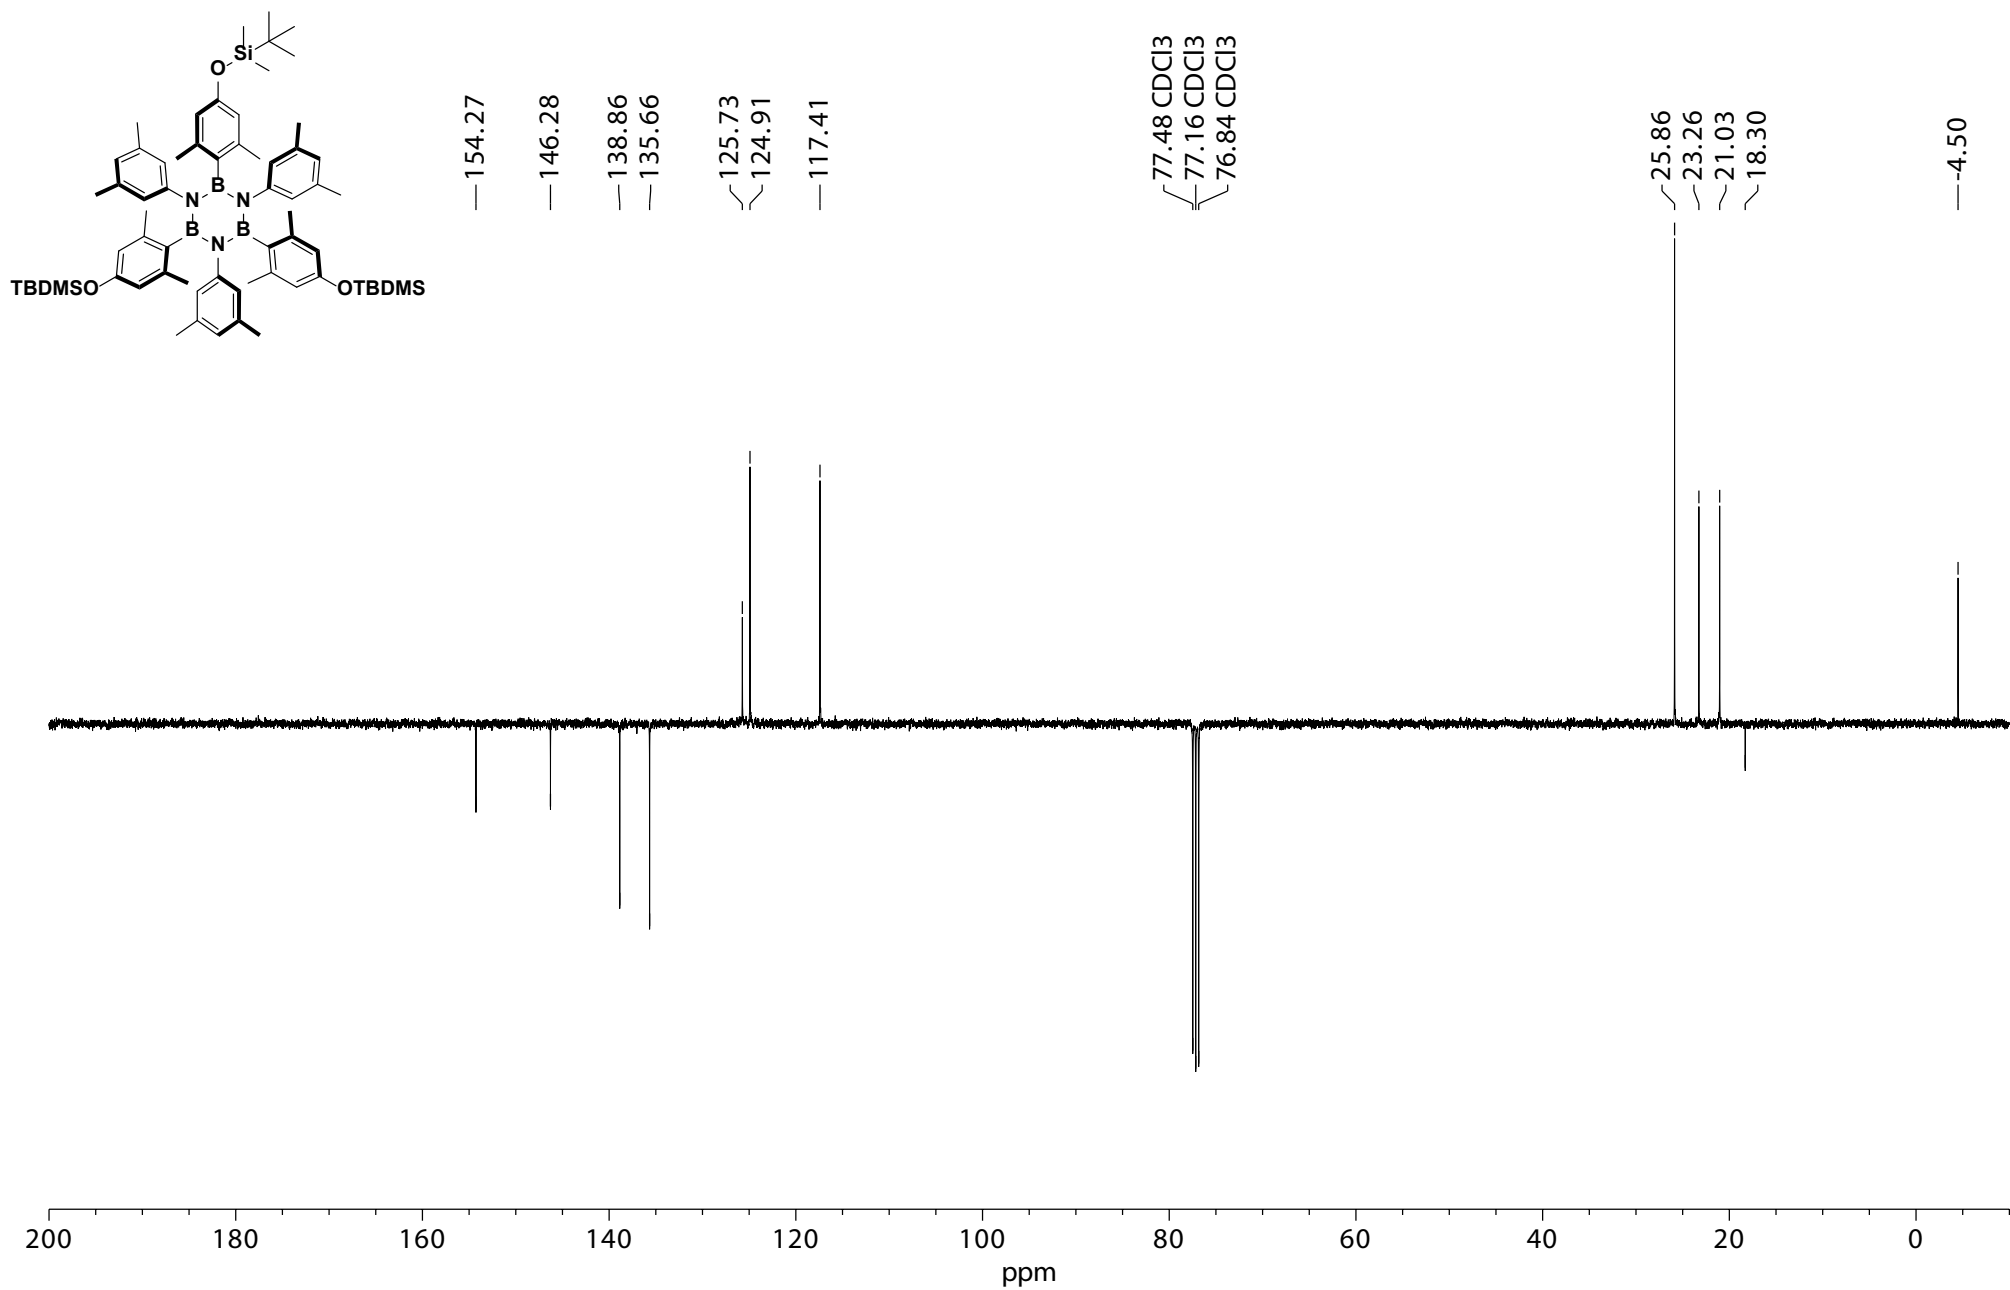

B,B',B''-Tris(4-((tert-butyl)dimethylsilyloxy)-2,6-dimethylphenyl)-N,N',N''-tris(3,5-dimethylphenyl)borazine-(8)

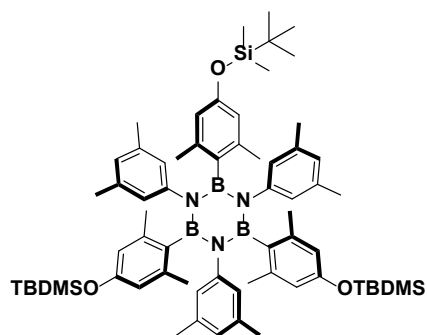

—37.2

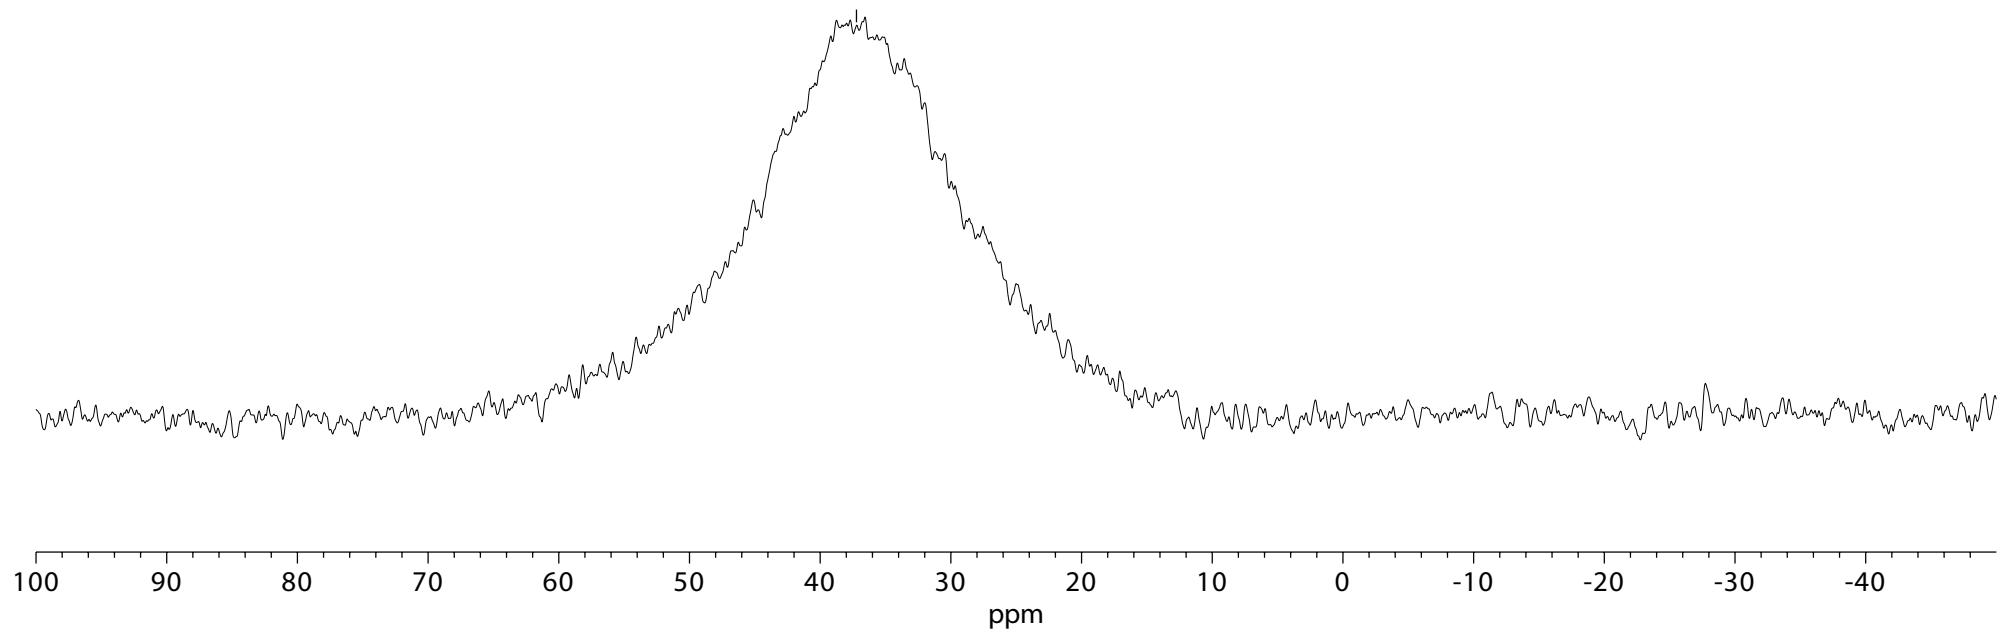

B,B',B''-Tris(2,6-dimethyl-4-(((trifluoromethyl)sulfonyl)oxy)phenyl)-N,N',N''-tris(3,5-dimethylphenyl)borazine-(9)

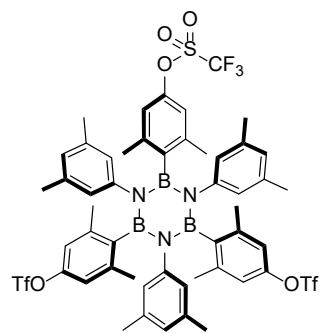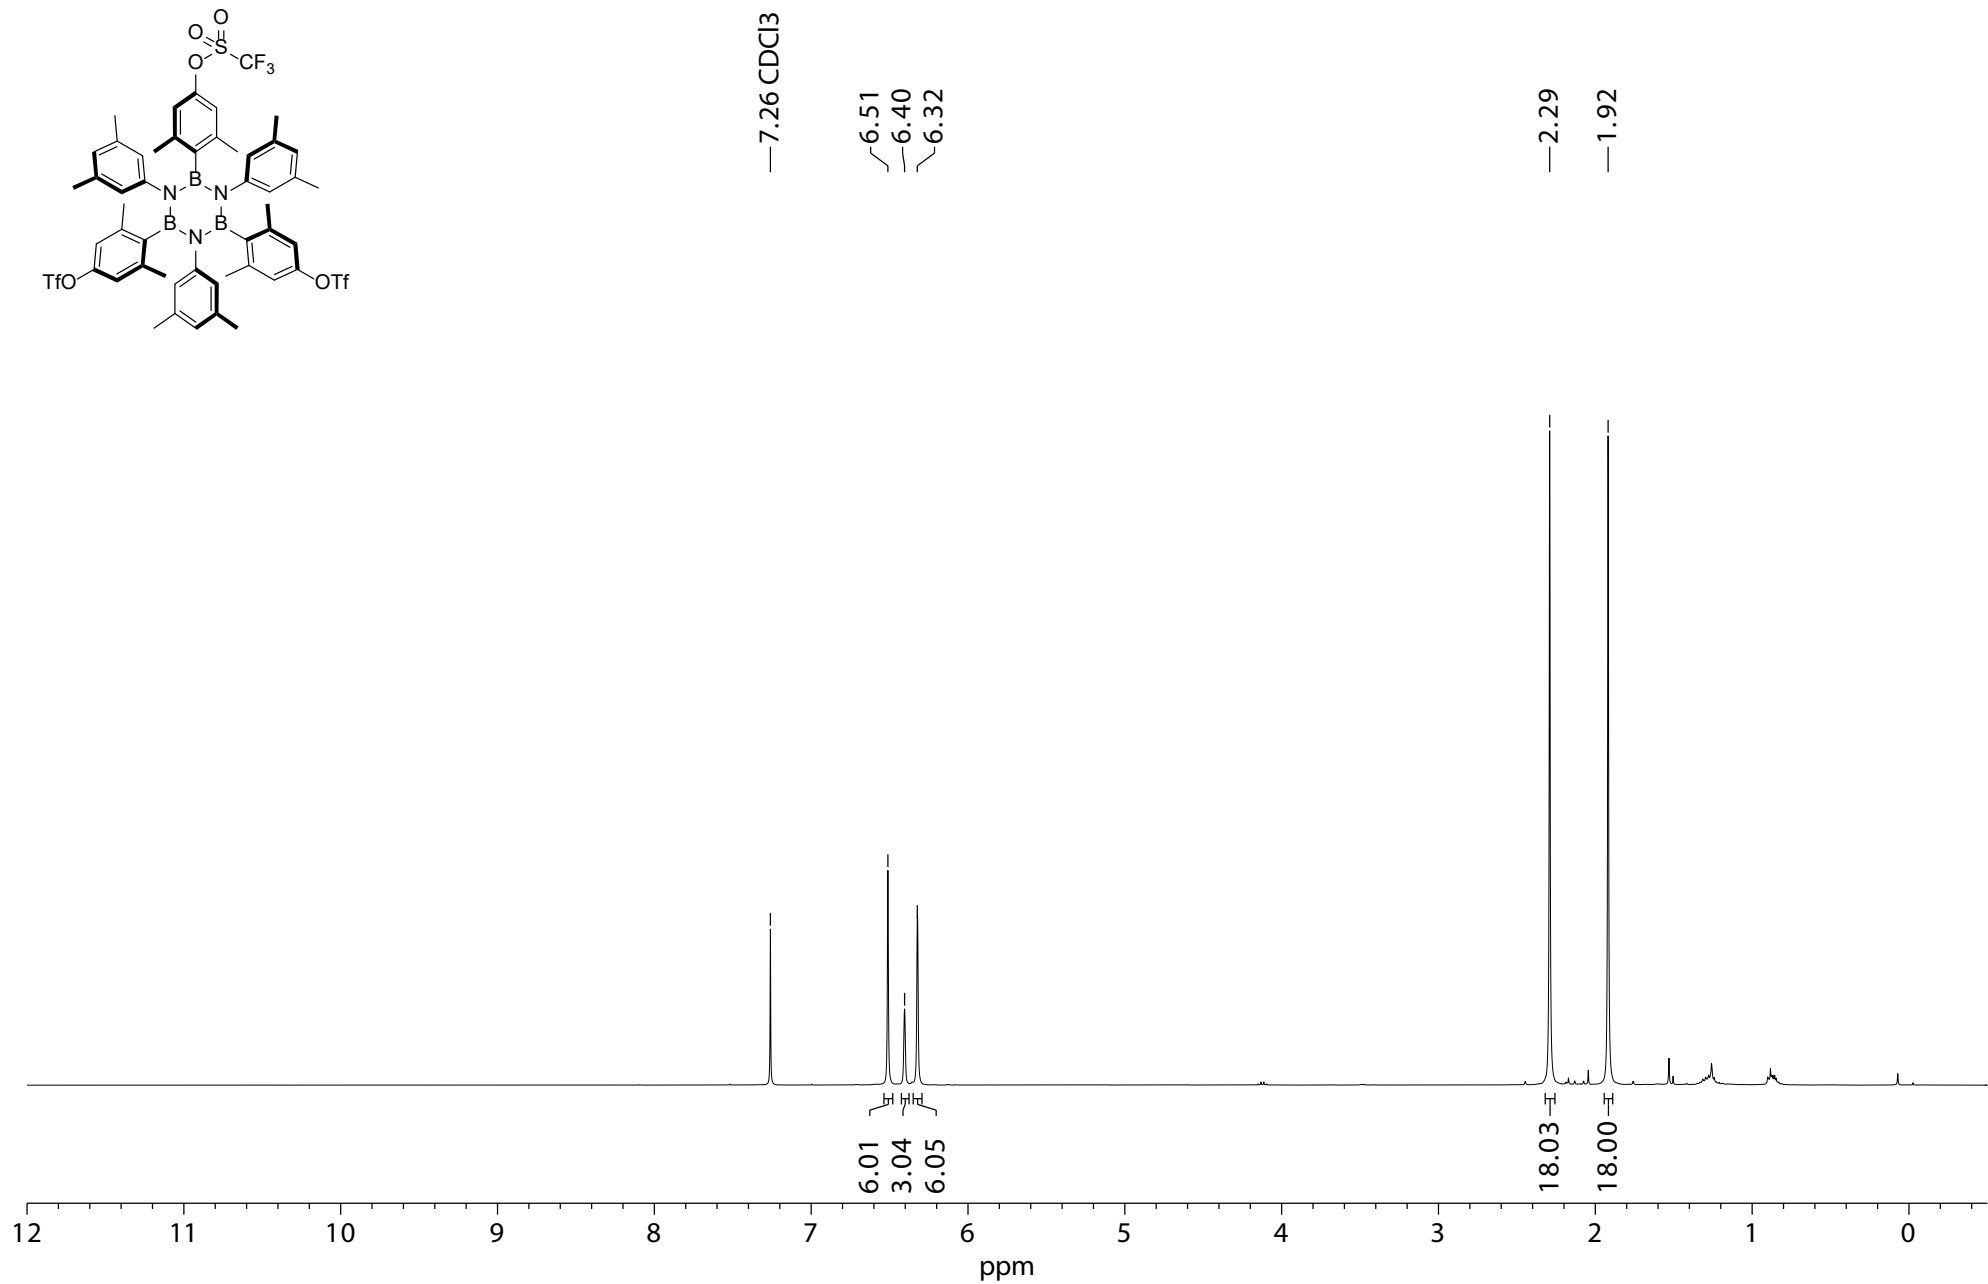

B,B',B''-Tris(2,6-dimethyl-4-(((trifluoromethyl)sulfonyl)oxy)phenyl)-N,N',N''-tris(3,5-dimethylphenyl)borazine-(9)

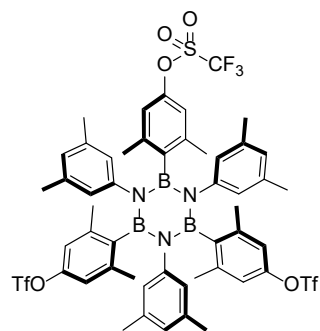

149.10  
144.62  
140.41  
136.70  
126.75  
124.54  
123.54  
120.35  
117.94  
117.16  
113.97

77.48 CDCl3  
77.16 CDCl3  
76.84 CDCl3

23.22  
20.84

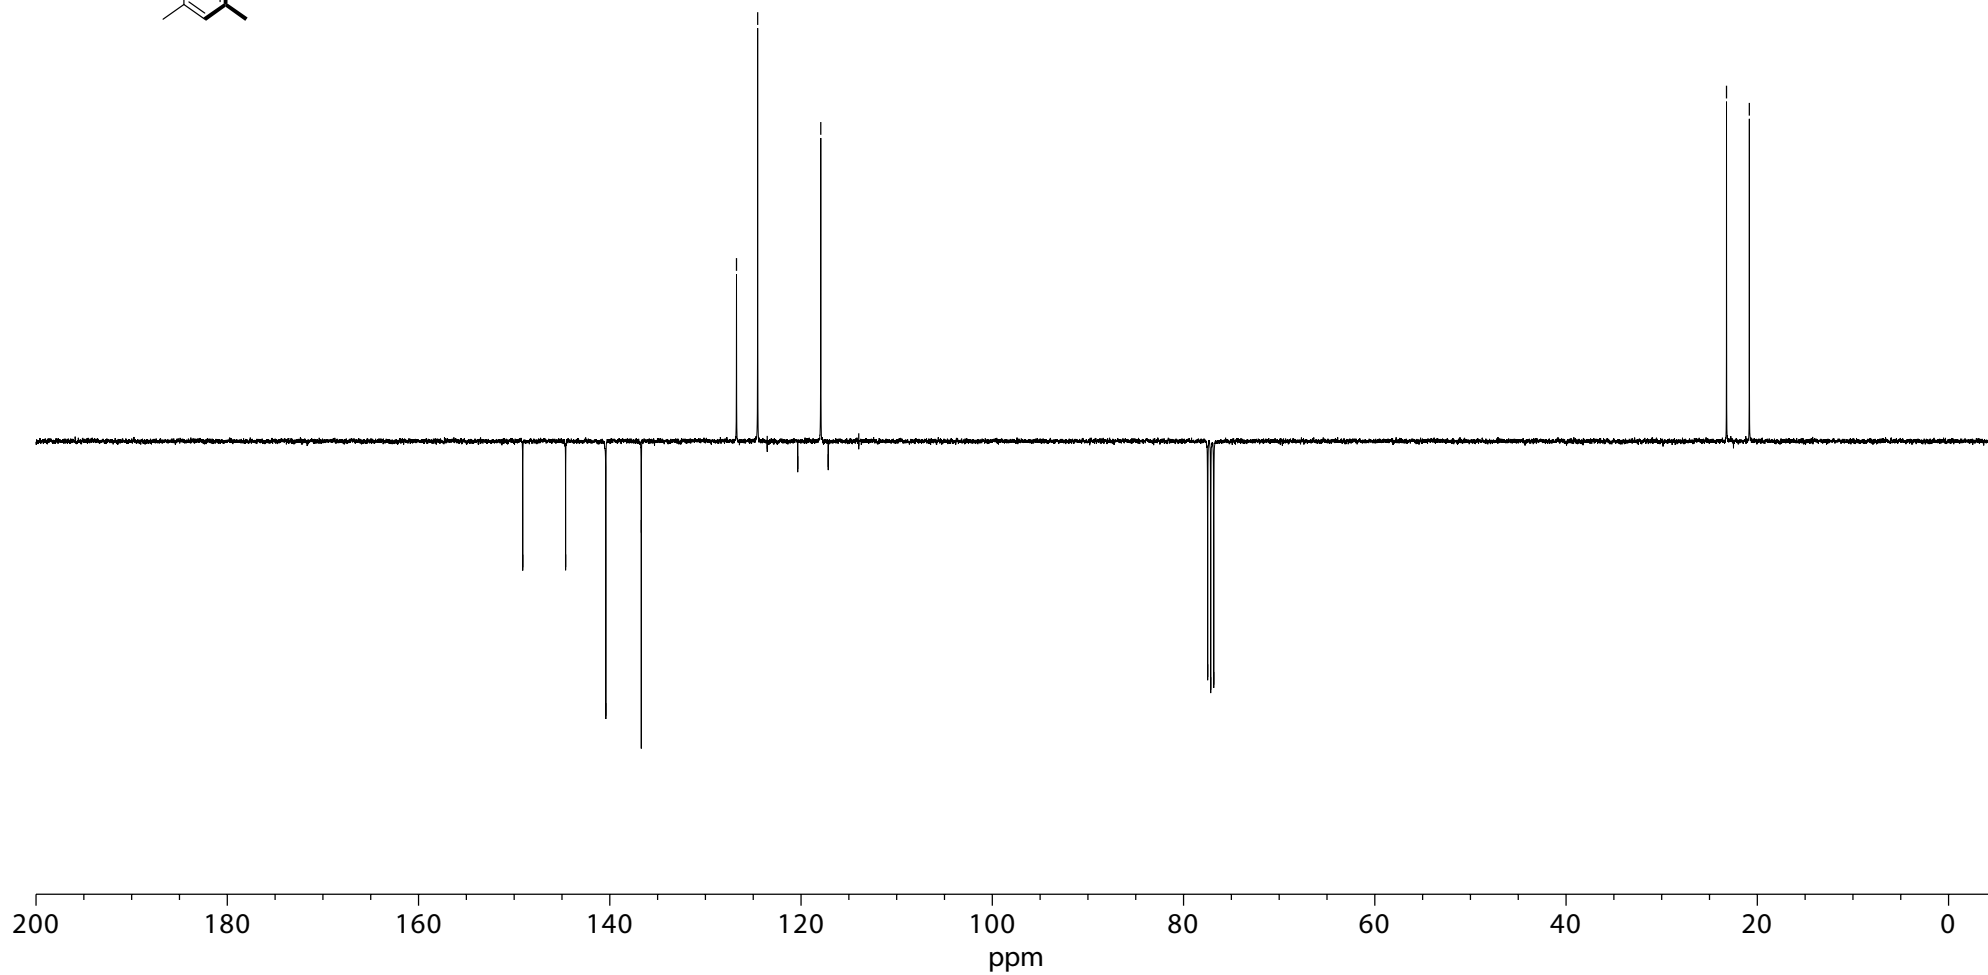



B,B',B''-Tris(2,6-dimethyl-4-(((trifluoromethyl)sulfonyl)oxy)phenyl)-N,N',N''-tris(3,5-dimethylphenyl)borazine-(9)

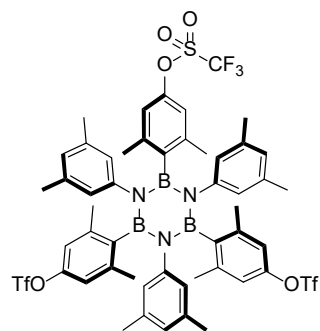

—35.2

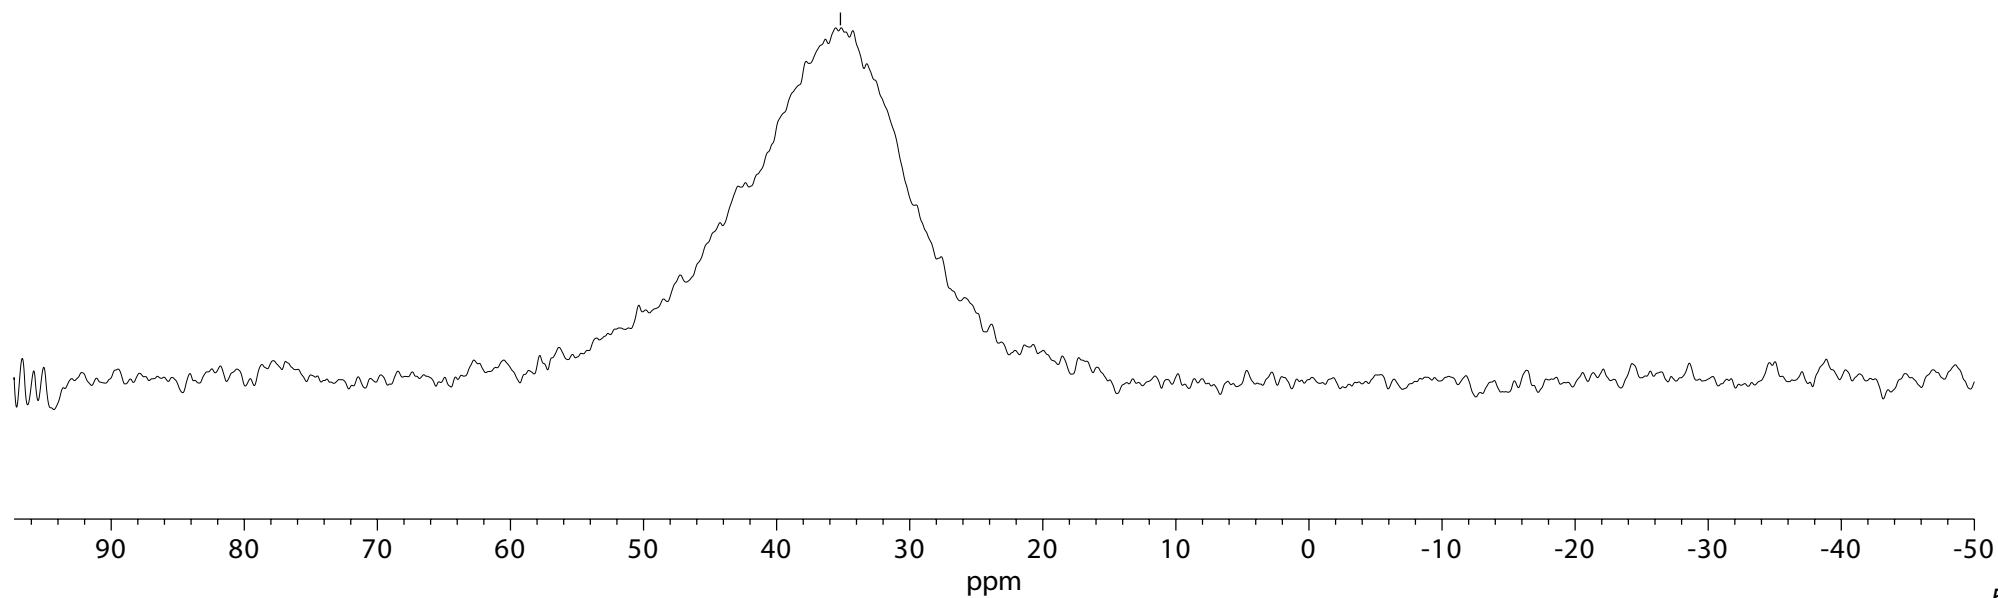

B,B',B''-Tris(2,6-dimethyl-4-(((trifluoromethyl)sulfonyl)oxy)phenyl)-N,N',N''-tris(3,5-dimethylphenyl)borazine-(9)

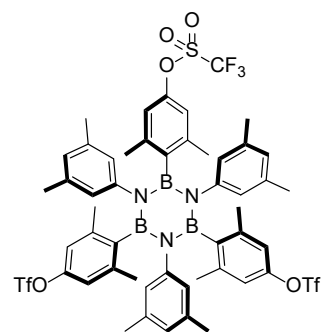

---73.01

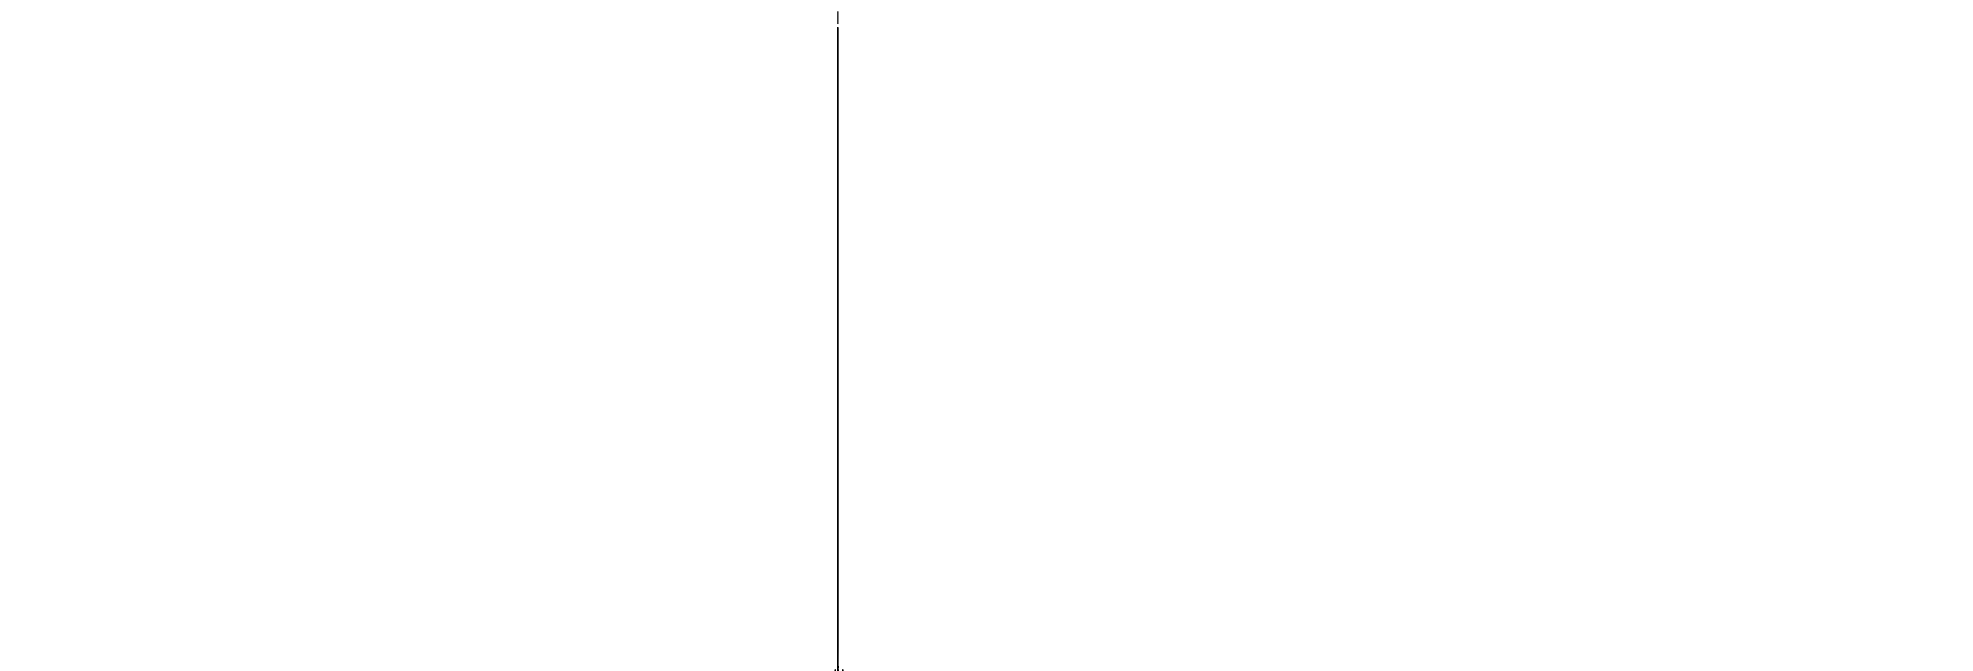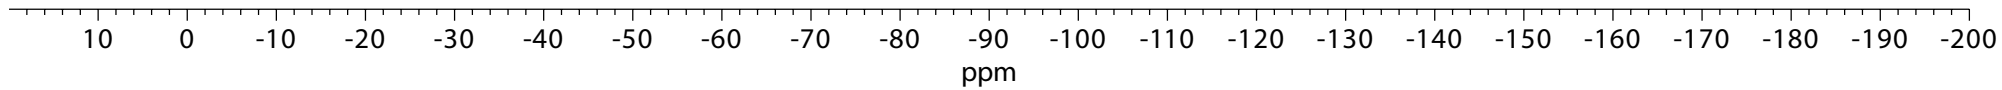

B,B',B''-Tris(2,6-difluorophenyl)-N,N',N''-tris(phenyl)borazine (10)

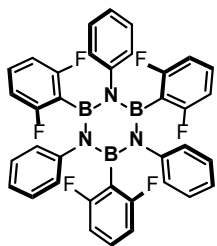

7.26 CDCl<sub>3</sub>  
7.10  
7.08  
6.93  
6.92  
6.89  
6.87  
6.85  
6.82  
6.81  
6.79  
6.40  
6.38  
6.36

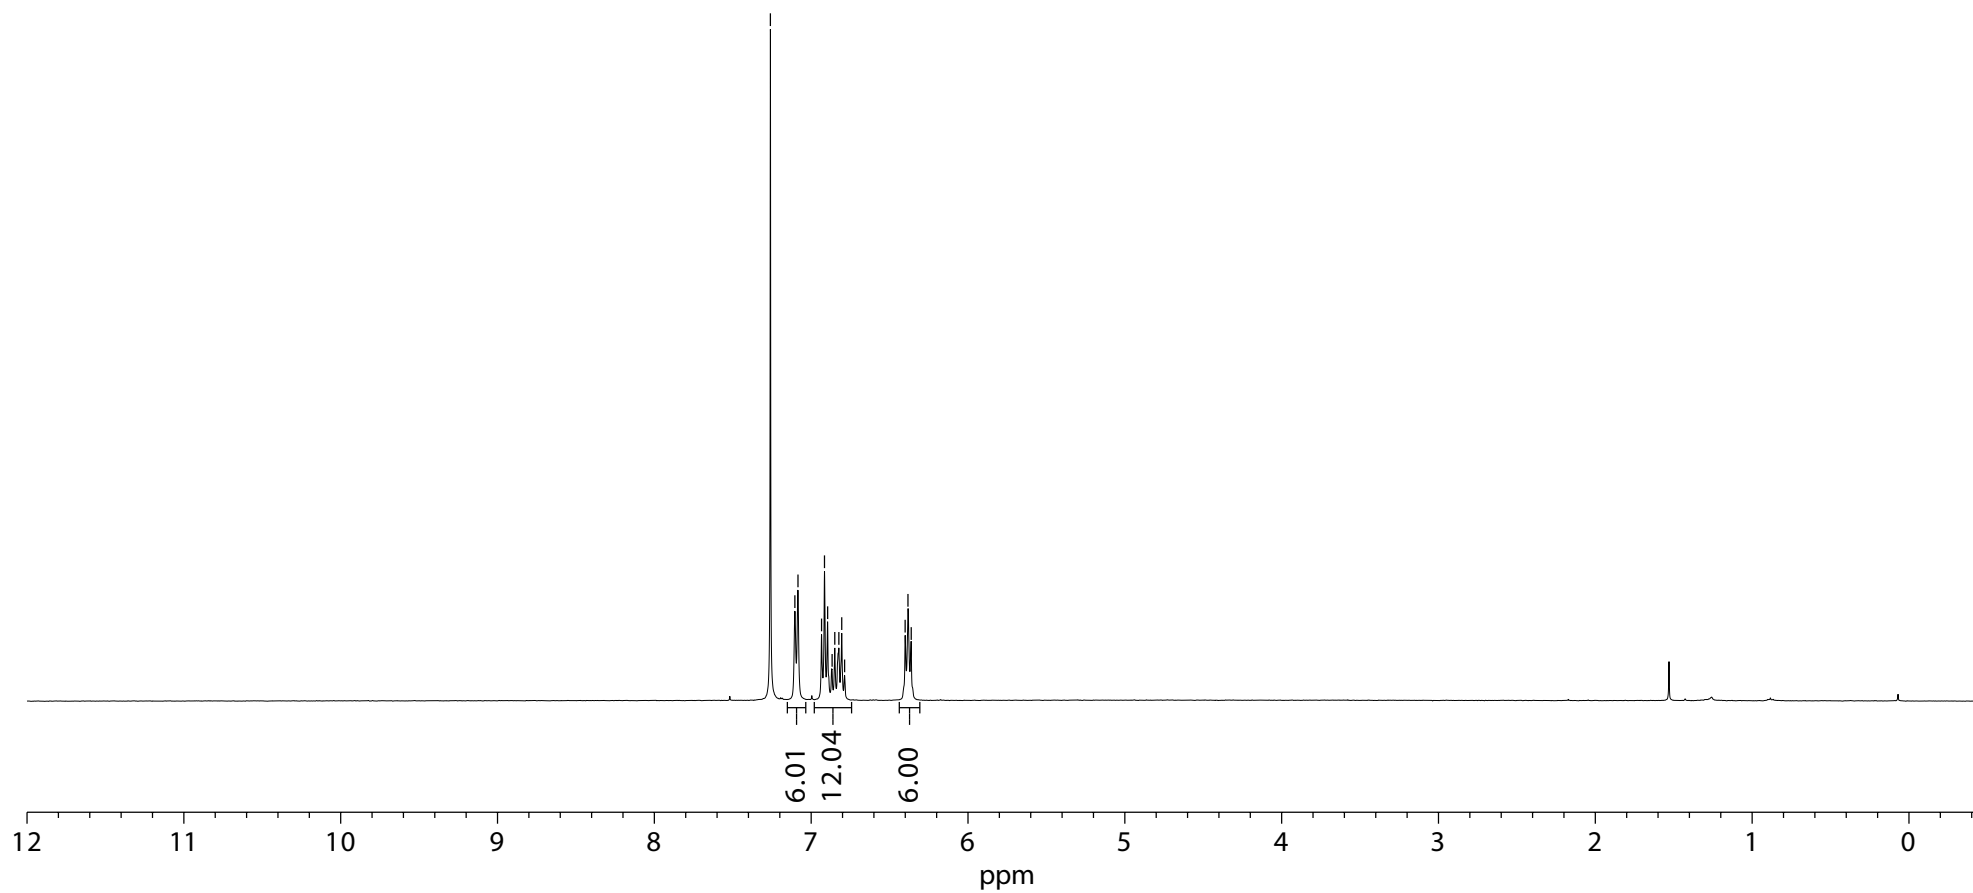

B,B',B''-Tris(2,6-difluorophenyl)-N,N',N''-tris(phenyl)borazine (10)

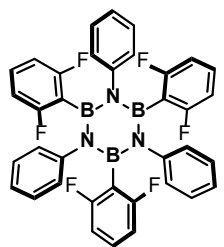

163.86  
163.71  
161.45  
161.31

145.75

130.72  
130.62  
130.52  
127.94  
126.99  
125.46

109.95  
109.88  
109.74  
109.68

77.48 CDCl3  
77.16 CDCl3  
76.84 CDCl3

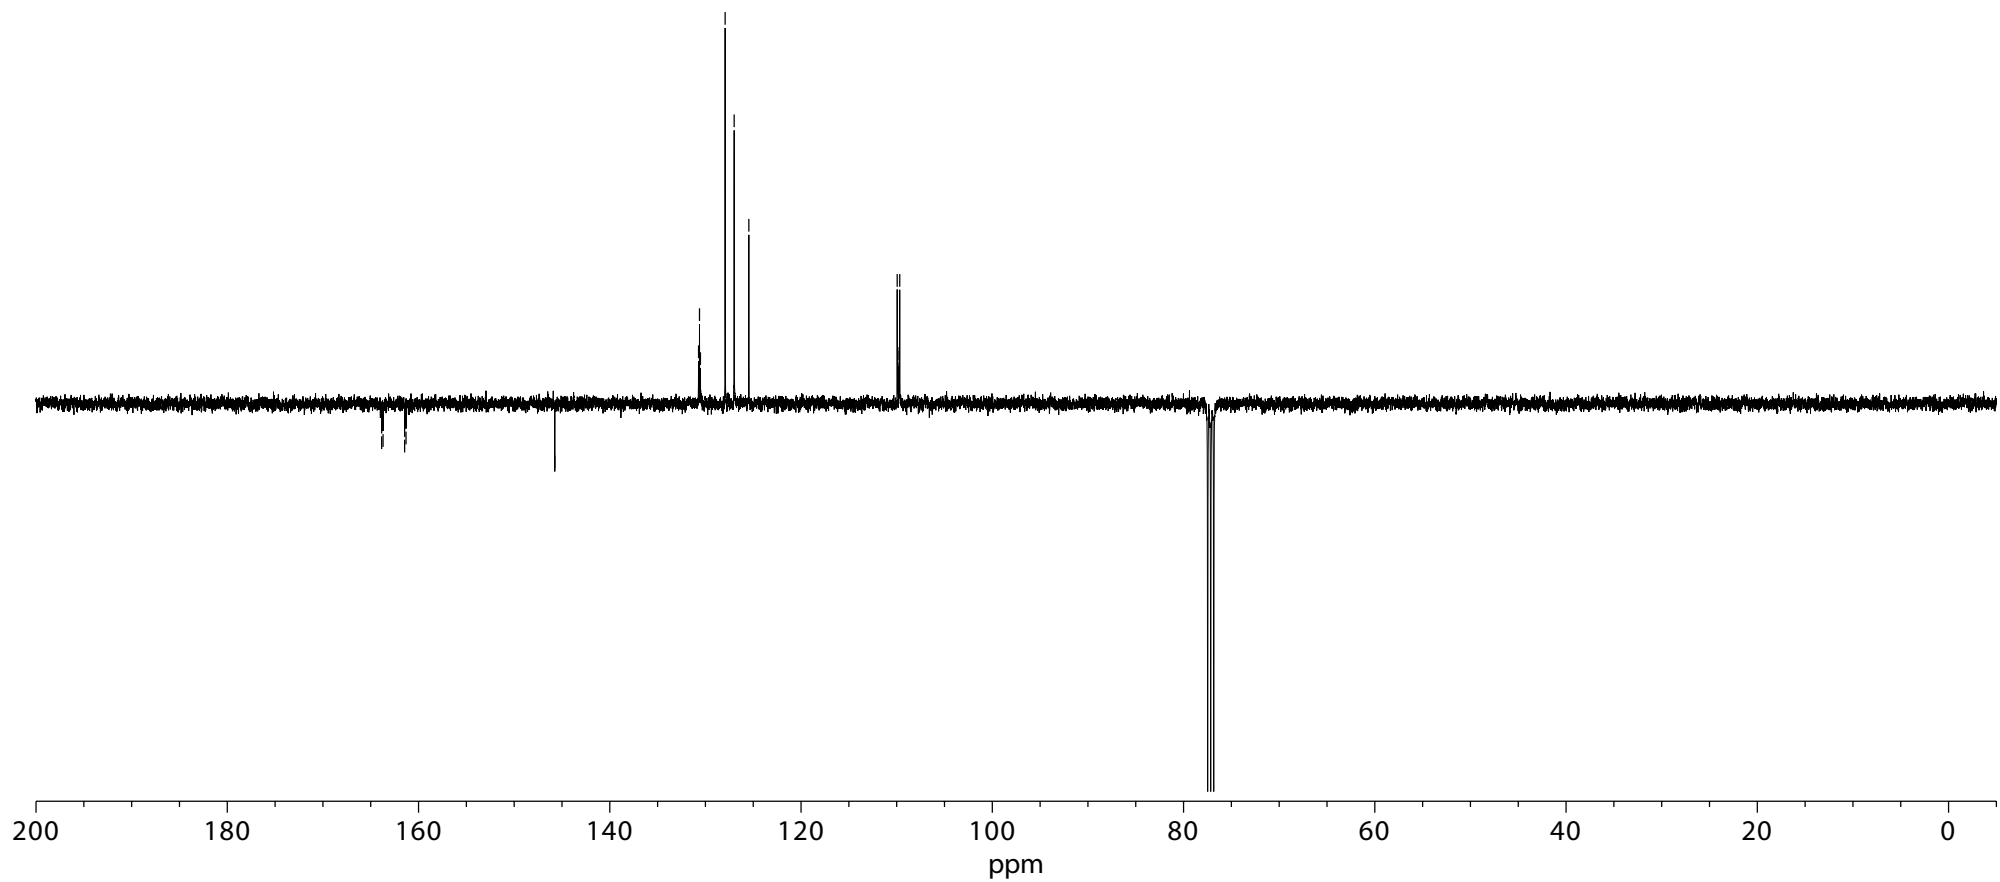

B,B',B''-Tris(2,6-difluorophenyl)-N,N',N''-tris(phenyl)borazine (10)

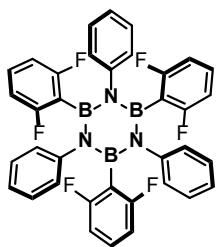

—34.1

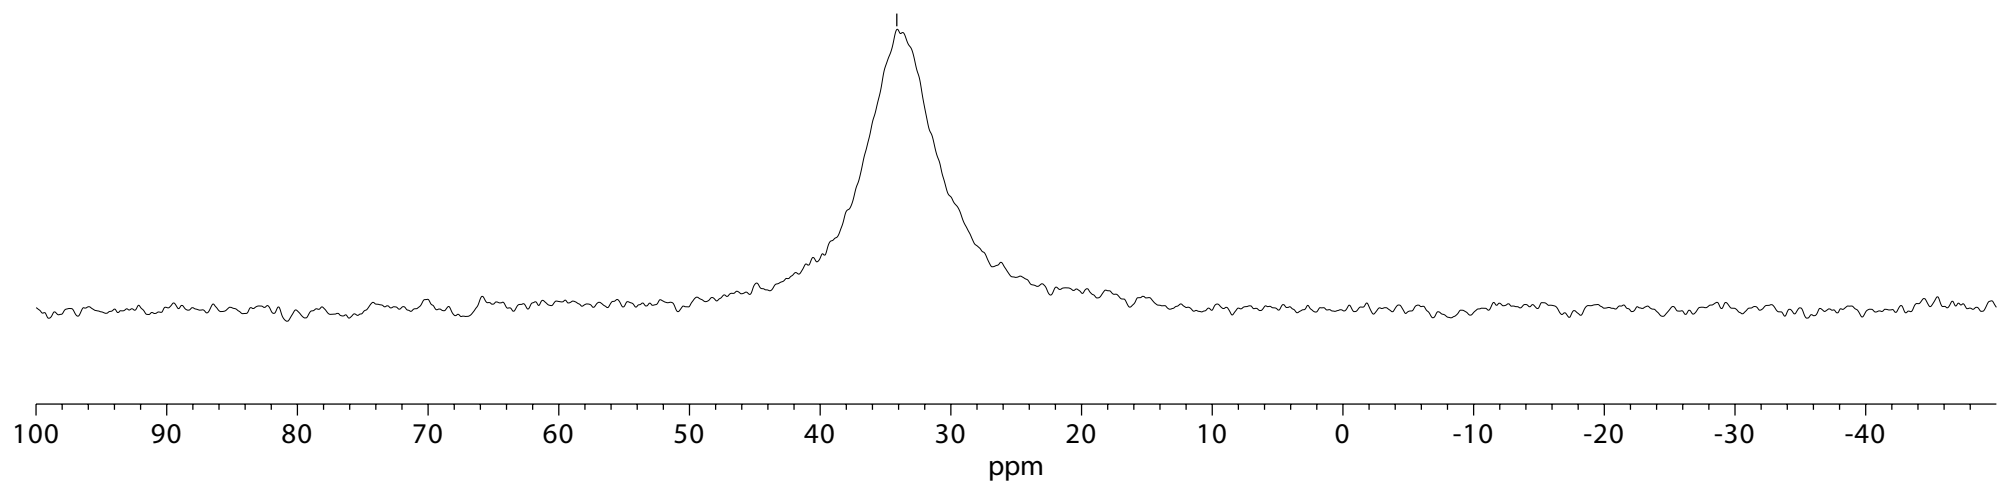

B,B',B''-Tris(2,6-difluorophenyl)-N,N',N''-tris(phenyl)borazine (10)



---101.4

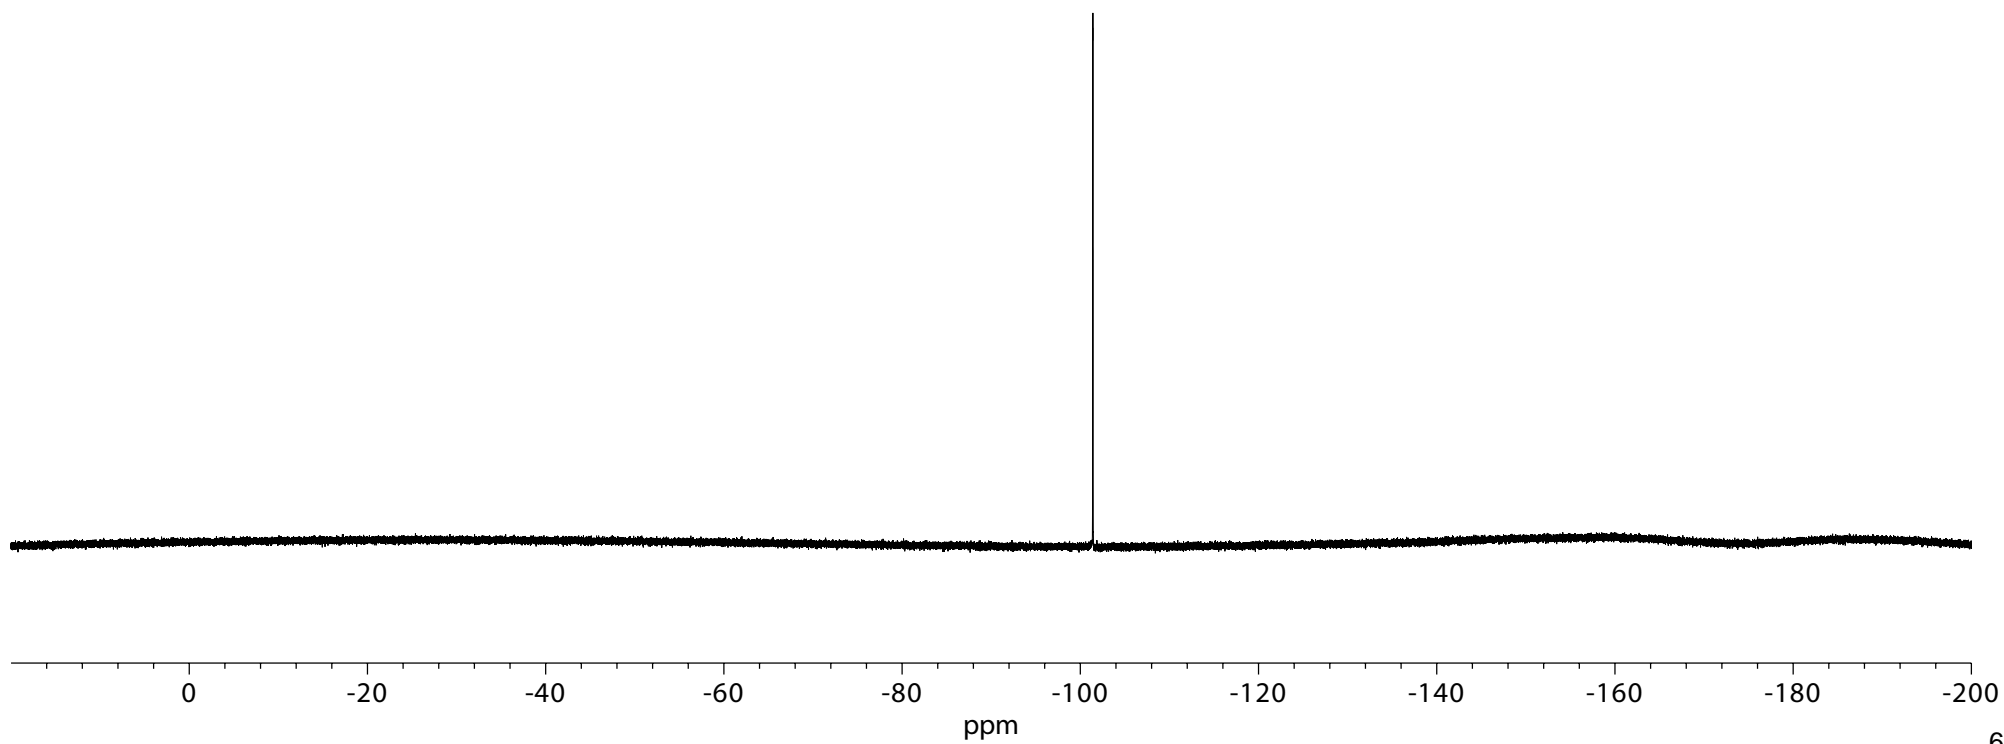

B,B',B''-Tris(4-(tertbutyl)-2,6-dimethylphenyl)-N,N',N''-tris(4-iodo-3,5-dimethylphenyl)borazine-(11)

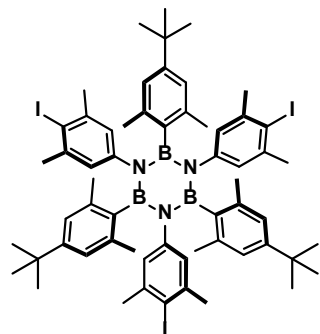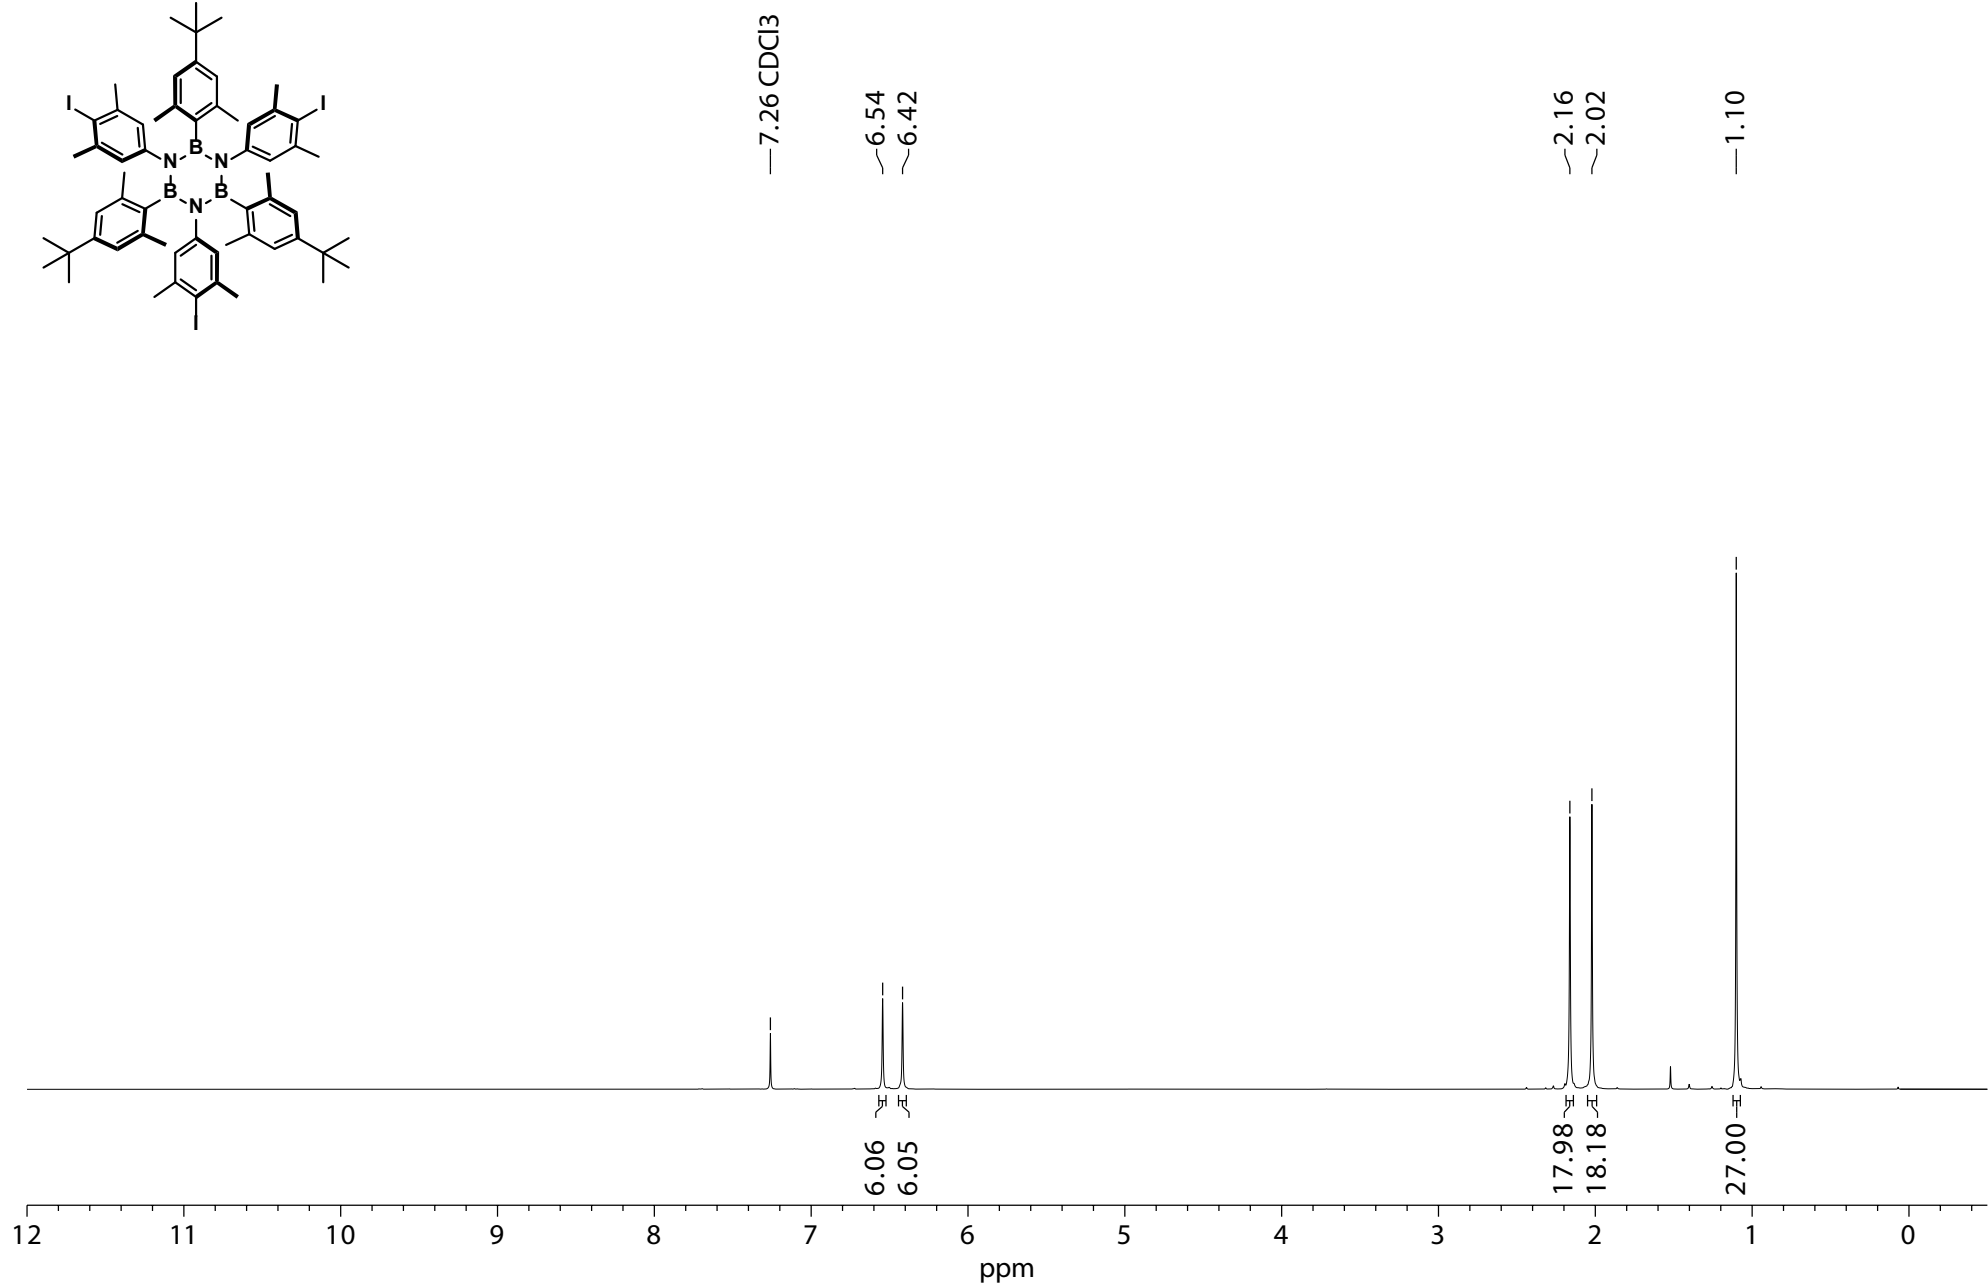

B,B',B''-Tris(4-(tertbutyl)-2,6-dimethylphenyl)-N,N',N''-tris(4-iodo-3,5-dimethylphenyl)borazine-(11)

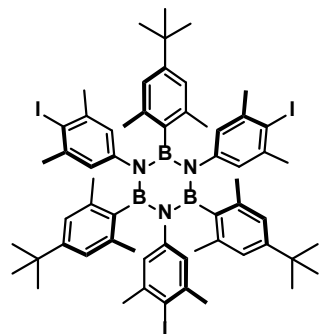

149.98  
145.58  
139.65  
137.06  
126.24  
122.54  
102.50  
77.48 CDCl3  
77.16 CDCl3  
76.84 CDCl3  
34.14  
31.34  
29.02  
23.34

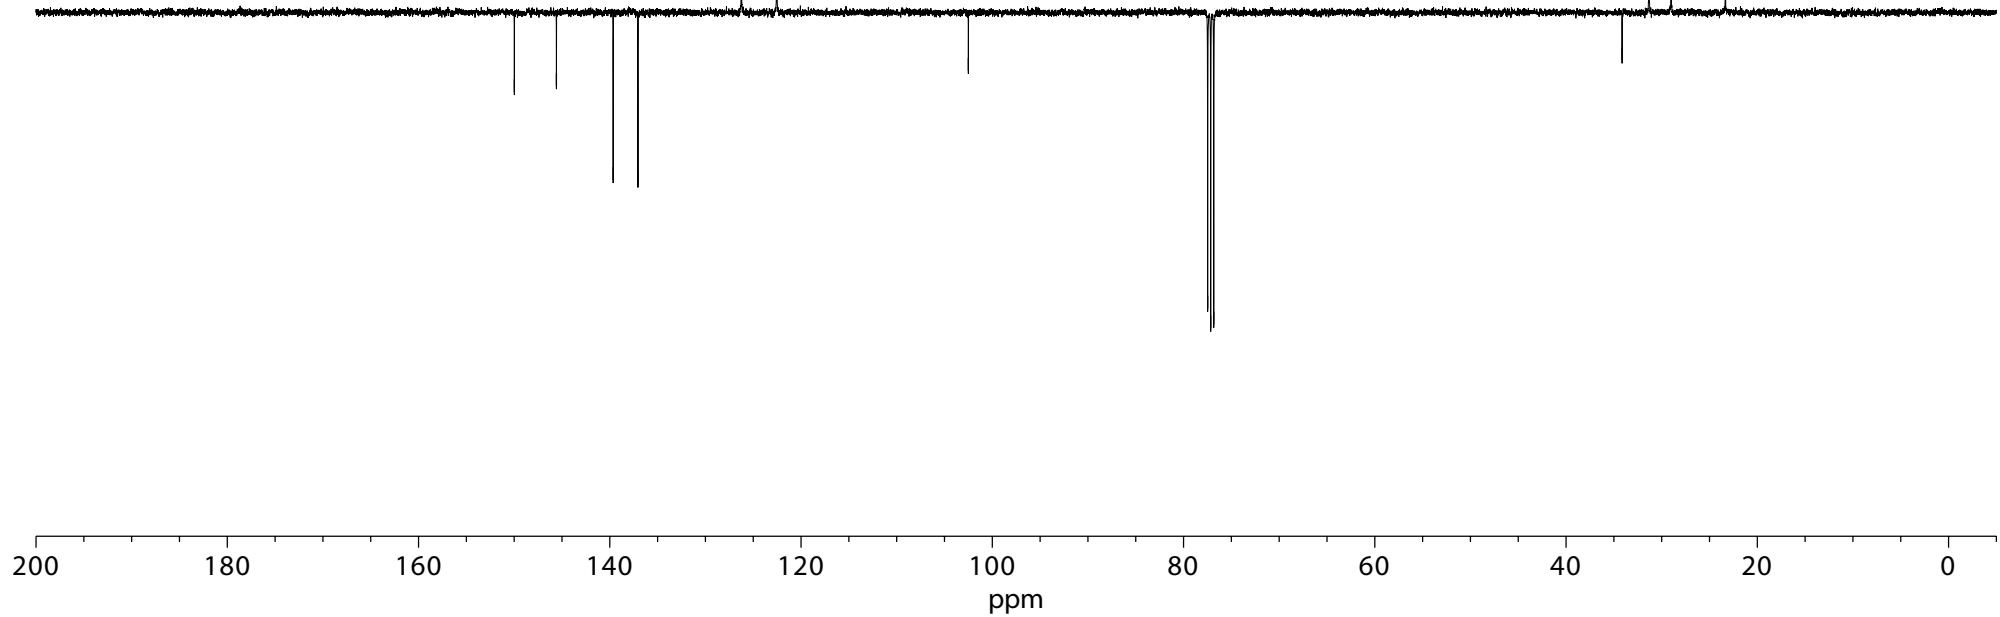



B,B',B''-Tris(4-(tertbutyl)-2,6-dimethylphenyl)-N,N',N''-tris(4-iodo-3,5-dimethylphenyl)borazine-(11)

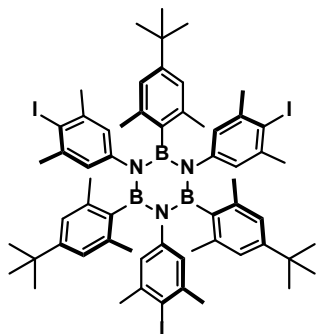

— 36.8

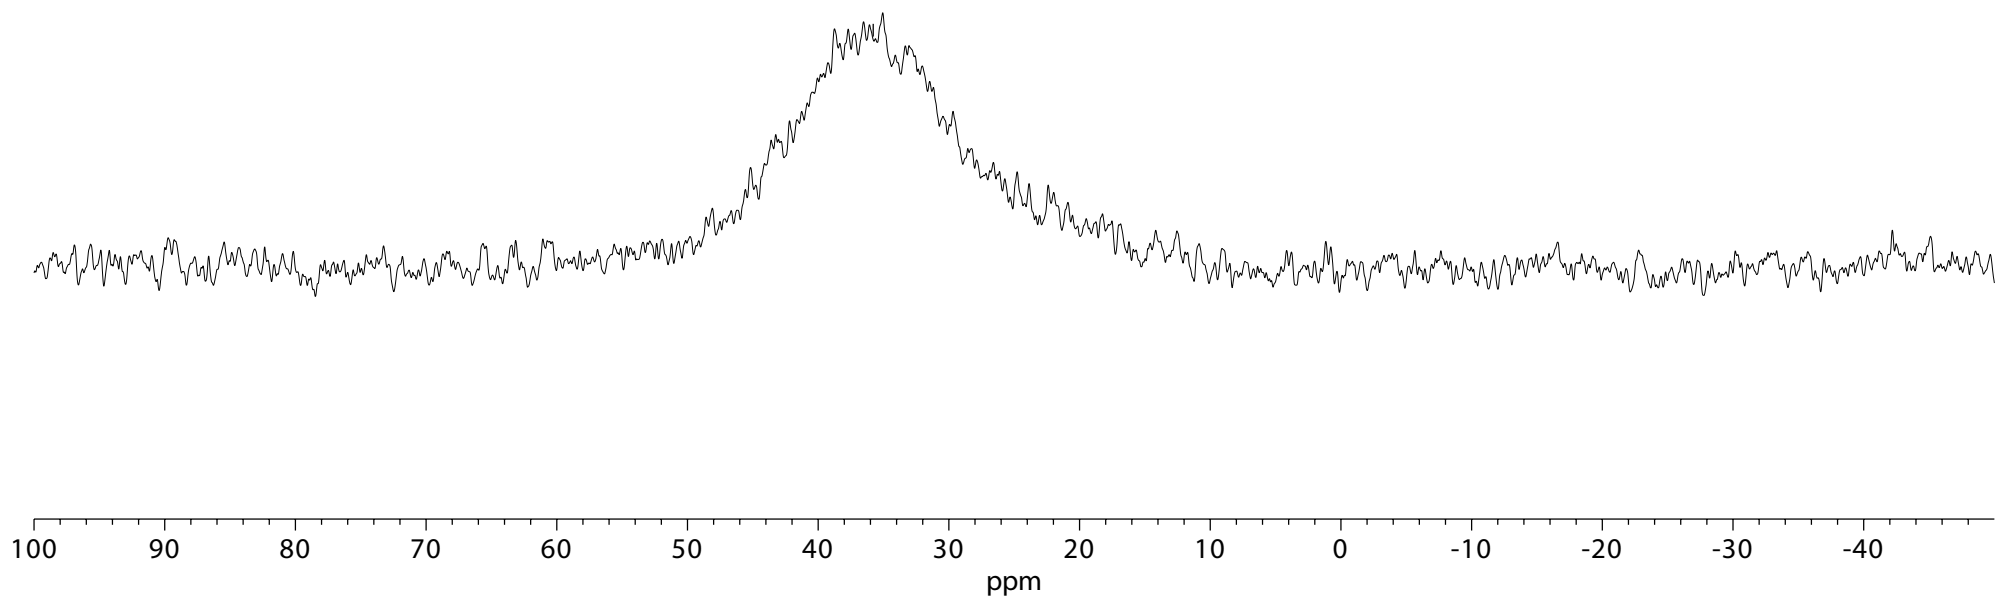

B,B',B''-Tris(3-iodo-2,6-dimethylphenyl)-N,N',N''-tris(4-tbutylphenyl)borazine-(12)

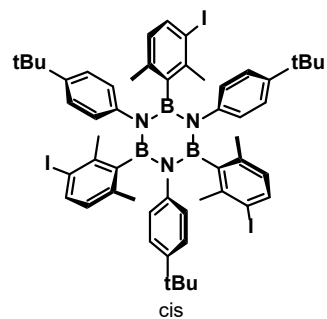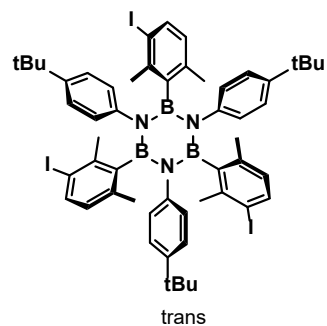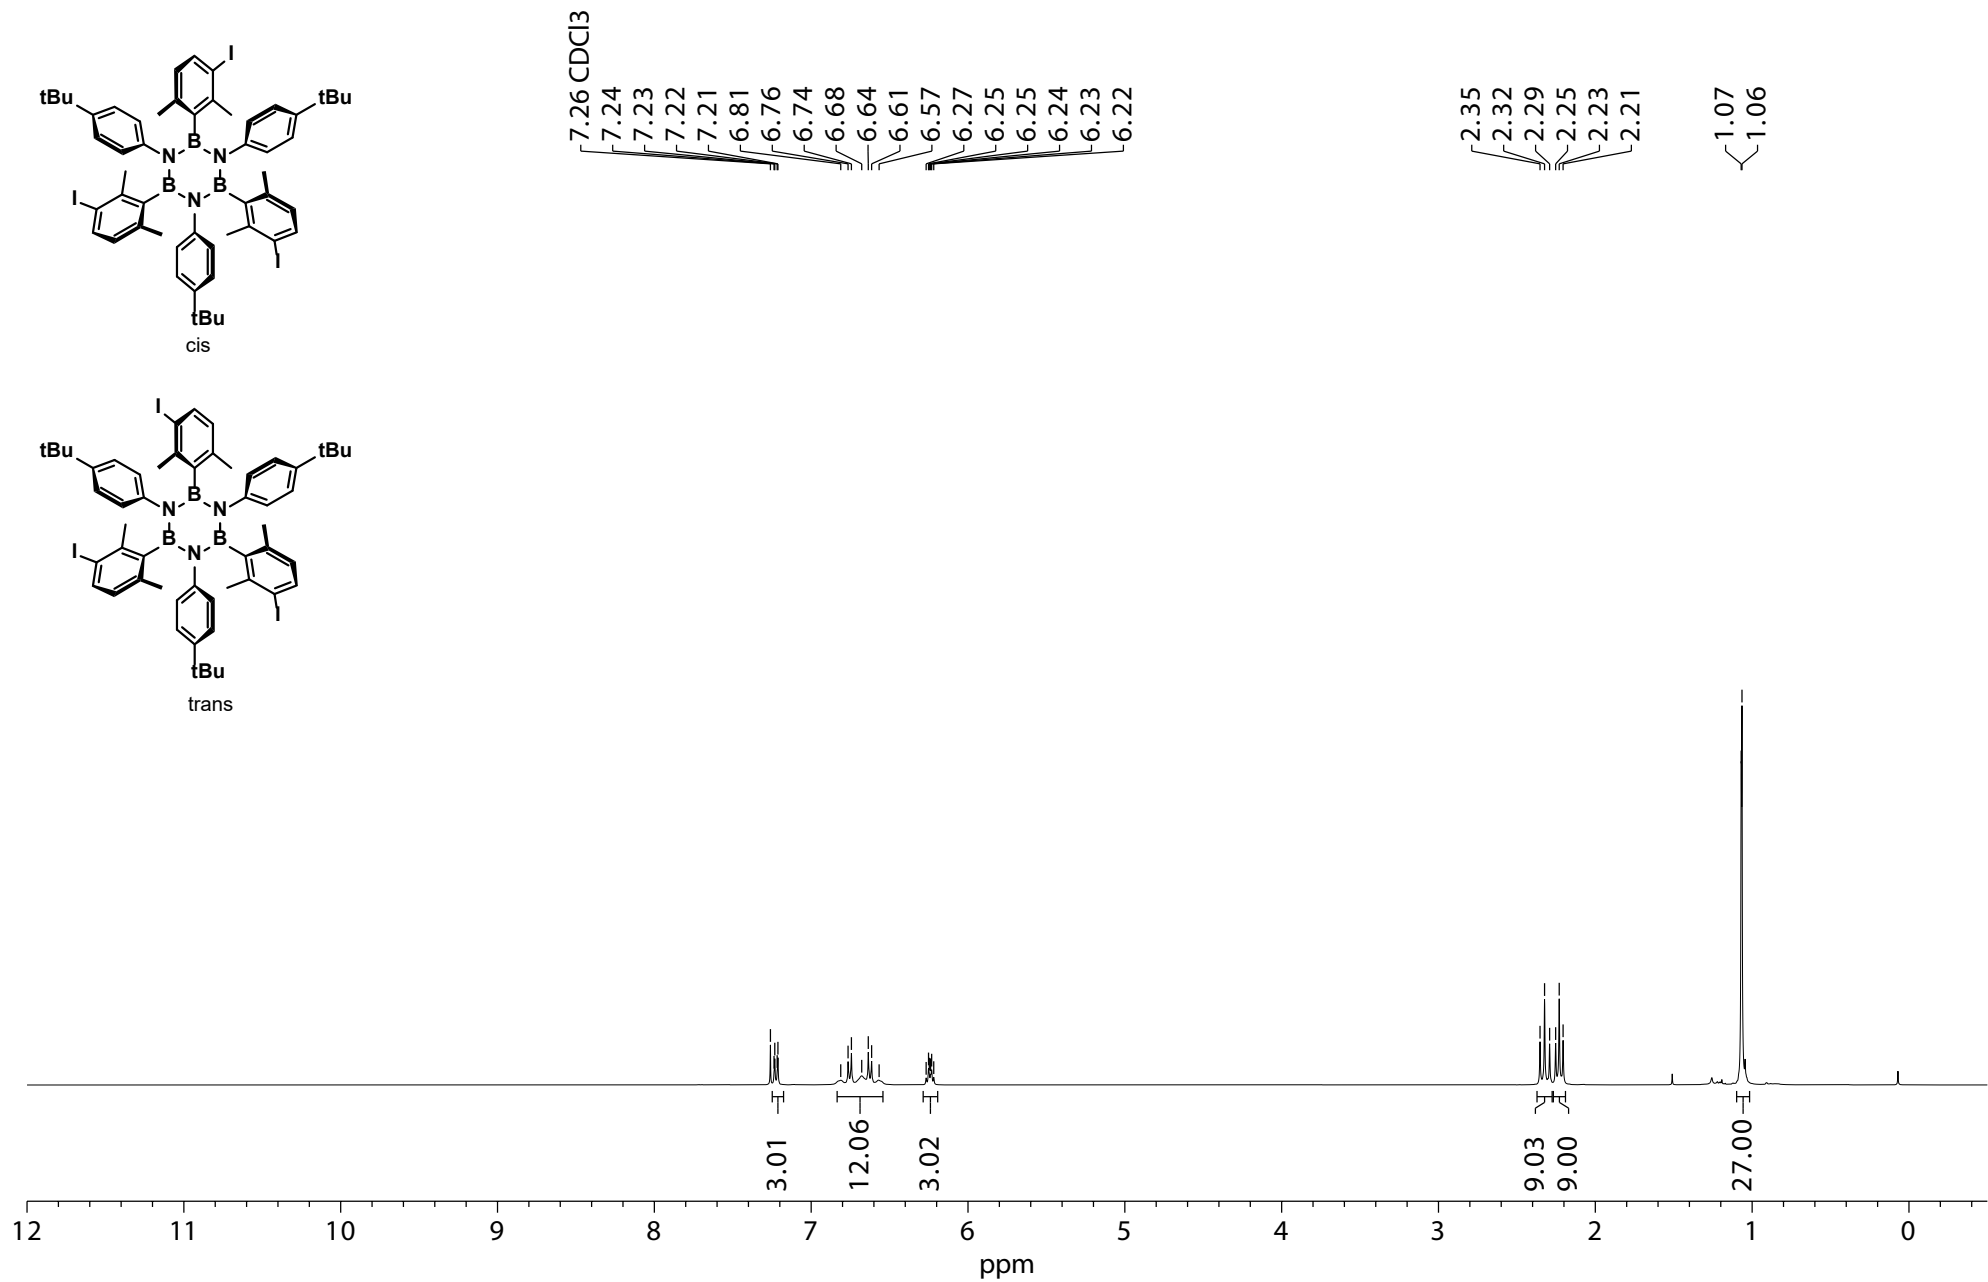

B,B',B''-Tris(3-iodo-2,6-dimethylphenyl)-N,N',N''-tris(4-*t*-butylphenyl)borazine-(12)

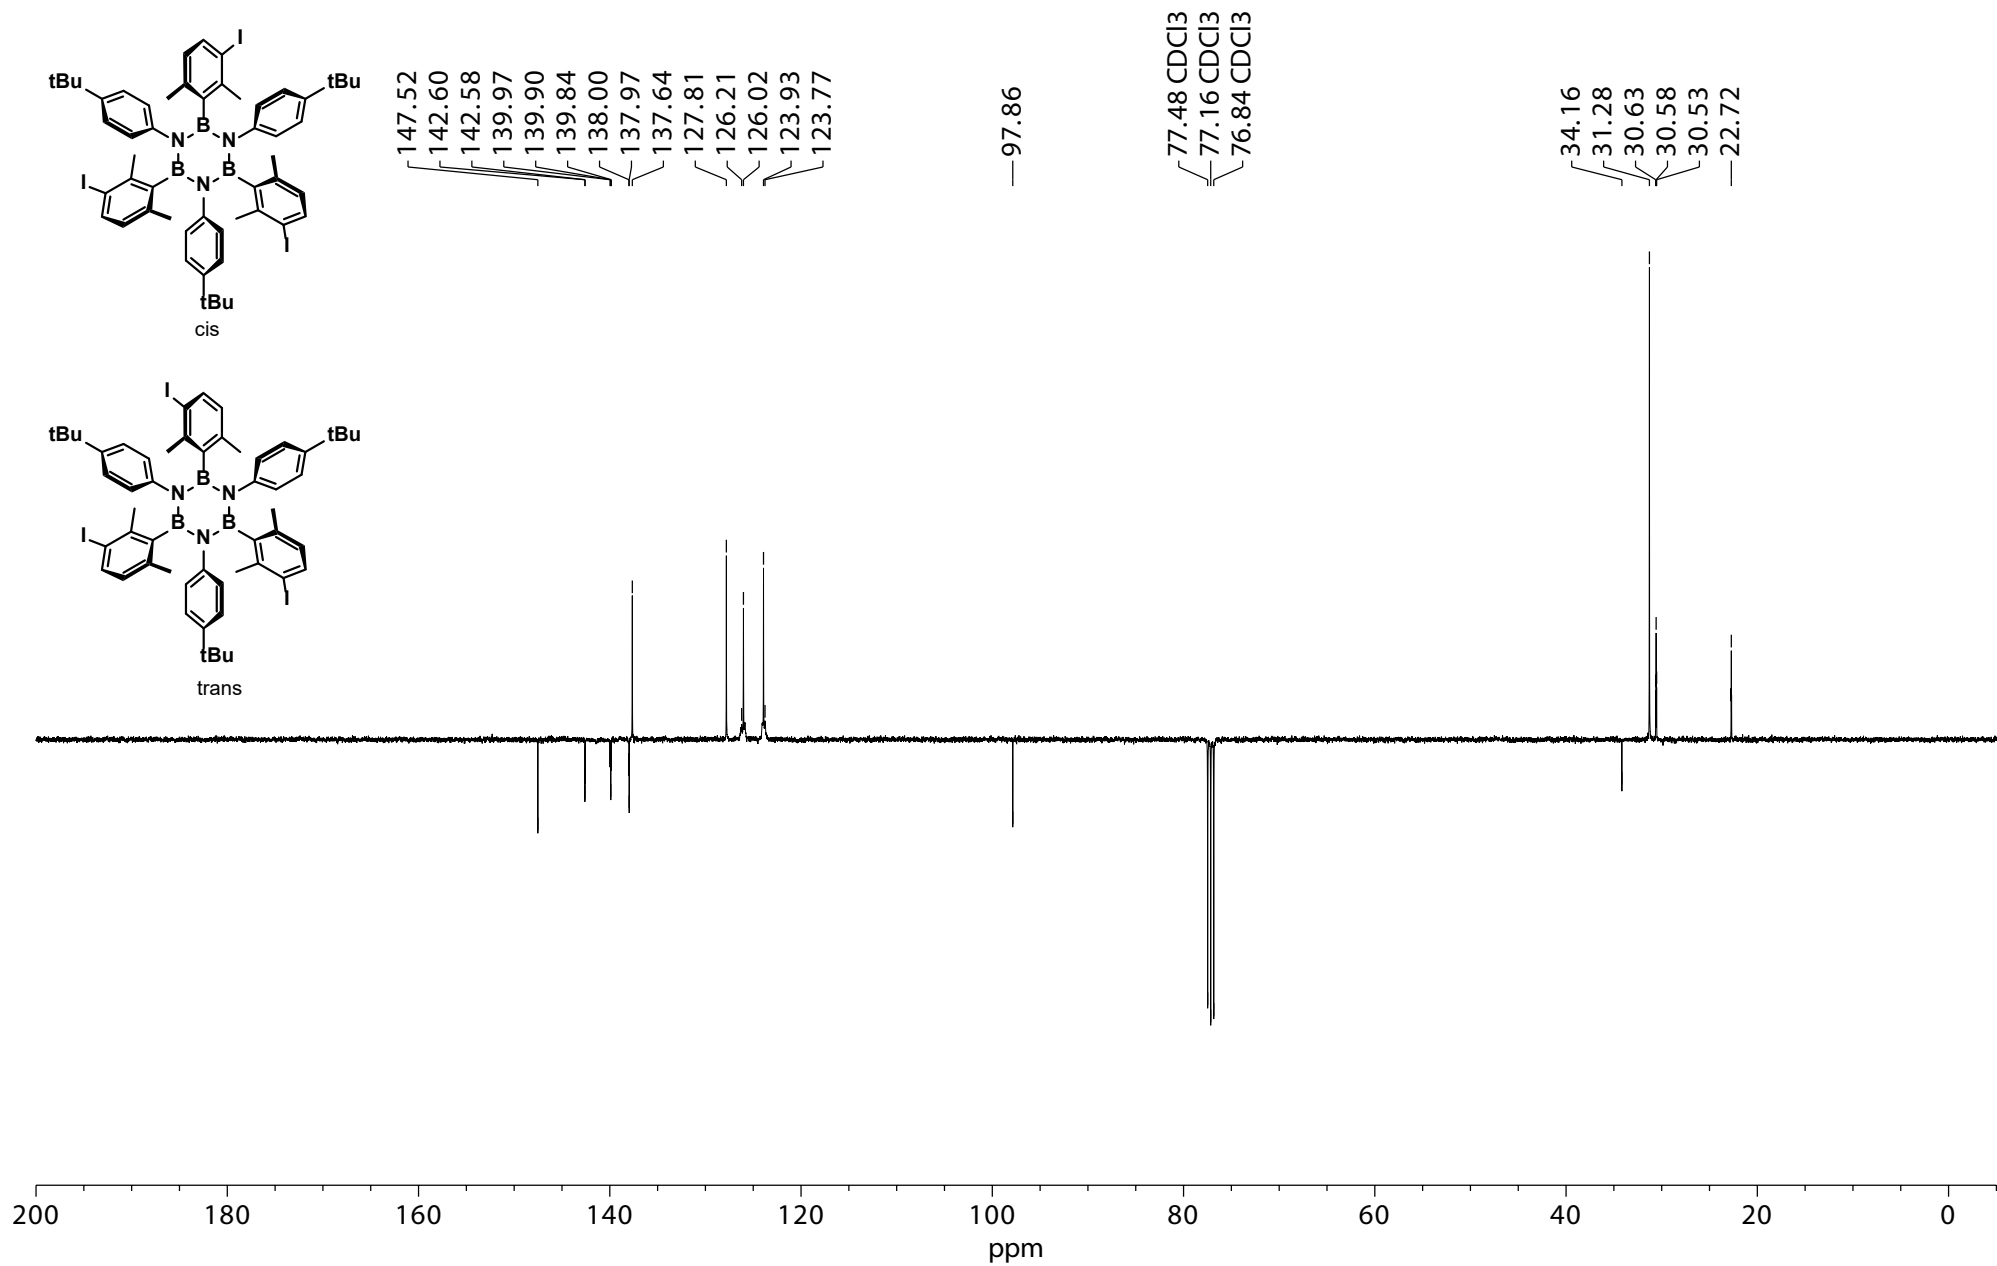

B,B',B''-Tris(3-iodo-2,6-dimethylphenyl)-N,N',N''-tris(4-tbutylphenyl)borazine-(12)

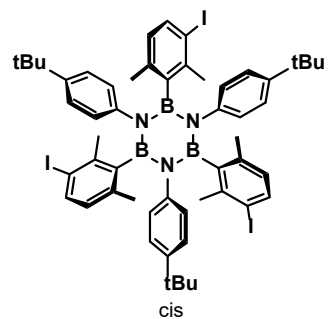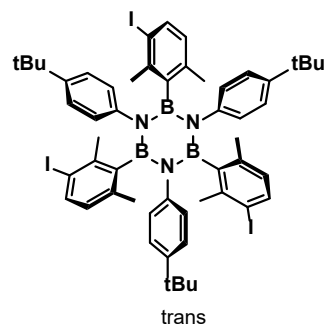

—37.1

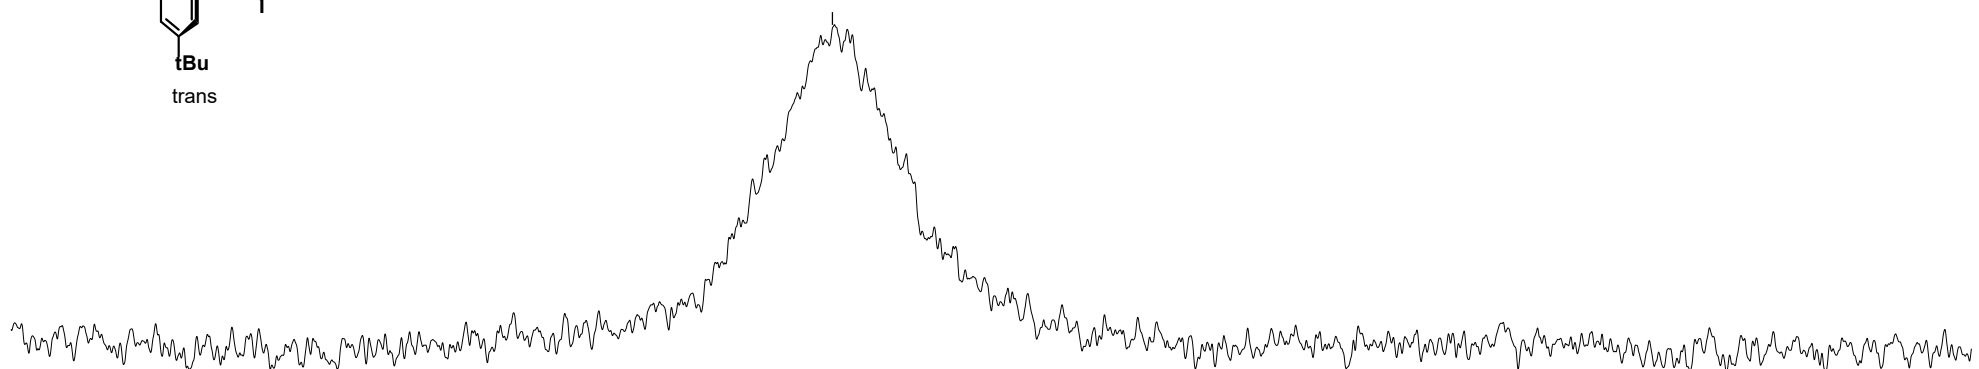

90 80 70 60 50 40 30 20 10 0 -10 -20 -30 -40 -50  
ppm

B,B',B''-Tris(3-iodo-2,4,6-trimethylphenyl)-N,N',N''-tris(4-tertbutylphenyl)borazine-(13)

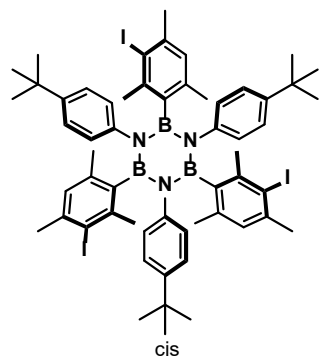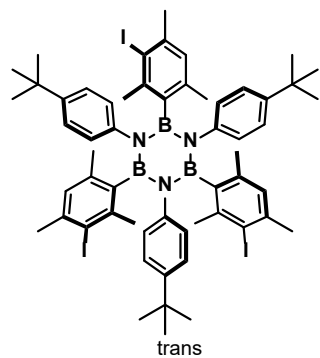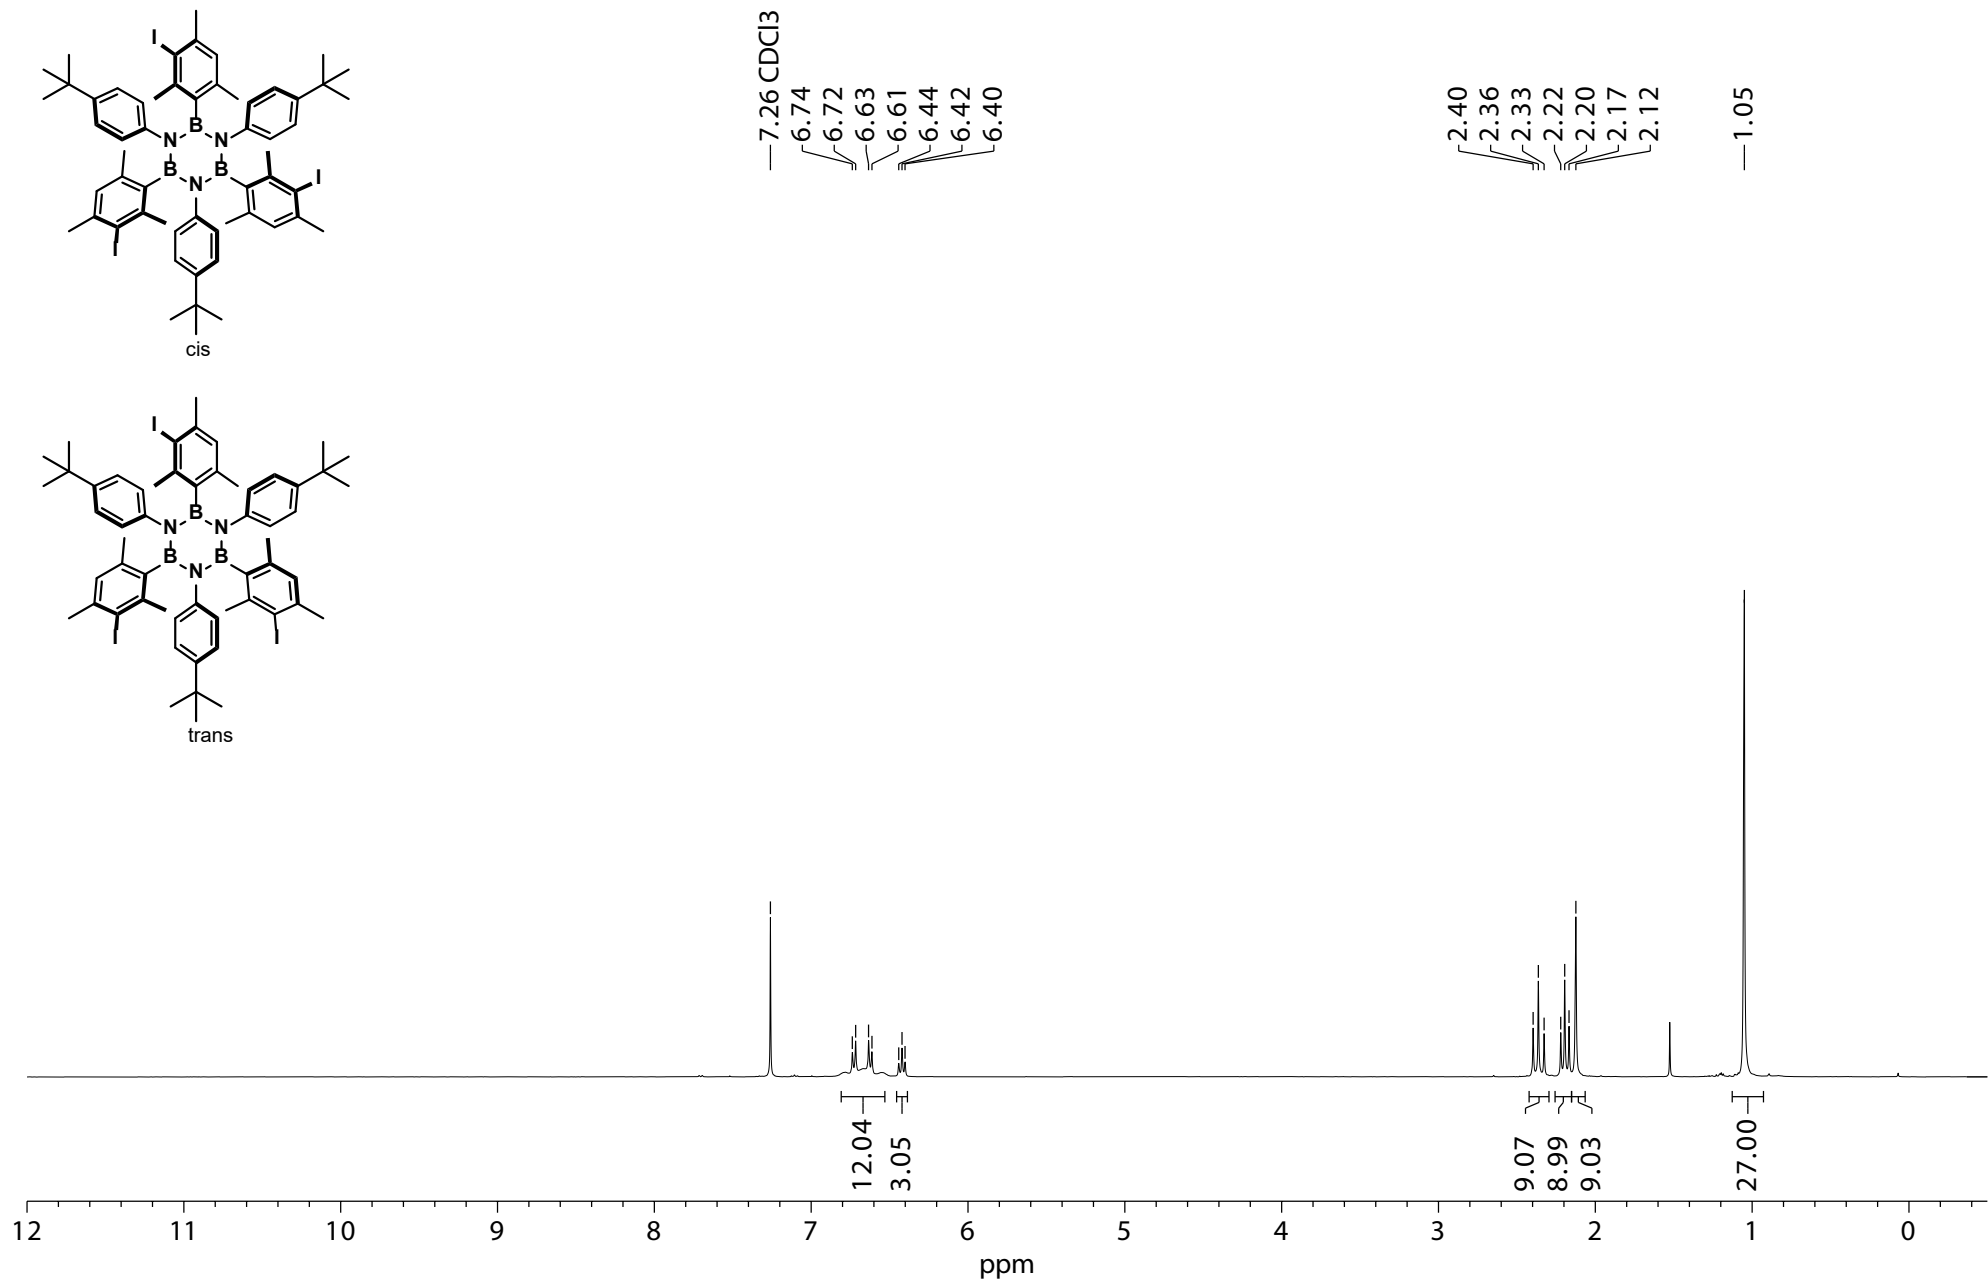

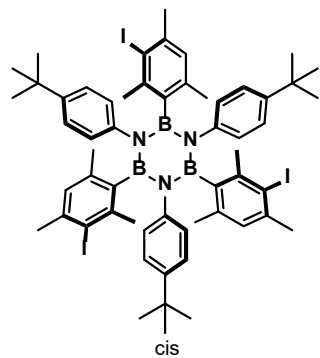

B, B', B''-Tris(3-iodo-2,4,6-trimethylphenyl)-N, N', N''-tris(4-tertbutylphenyl)borazine-(13)

147.17  
143.00  
140.80  
140.70  
140.64  
140.01  
137.34  
127.48  
126.07  
123.81

— 105.23

77.48 CDCl<sub>3</sub>  
77.16 CDCl<sub>3</sub>  
76.84 CDCl<sub>3</sub>

34.14  
32.19  
32.14  
32.07  
31.31  
29.52  
— 22.43

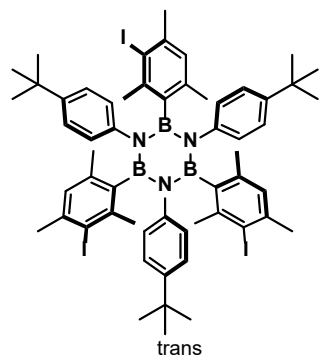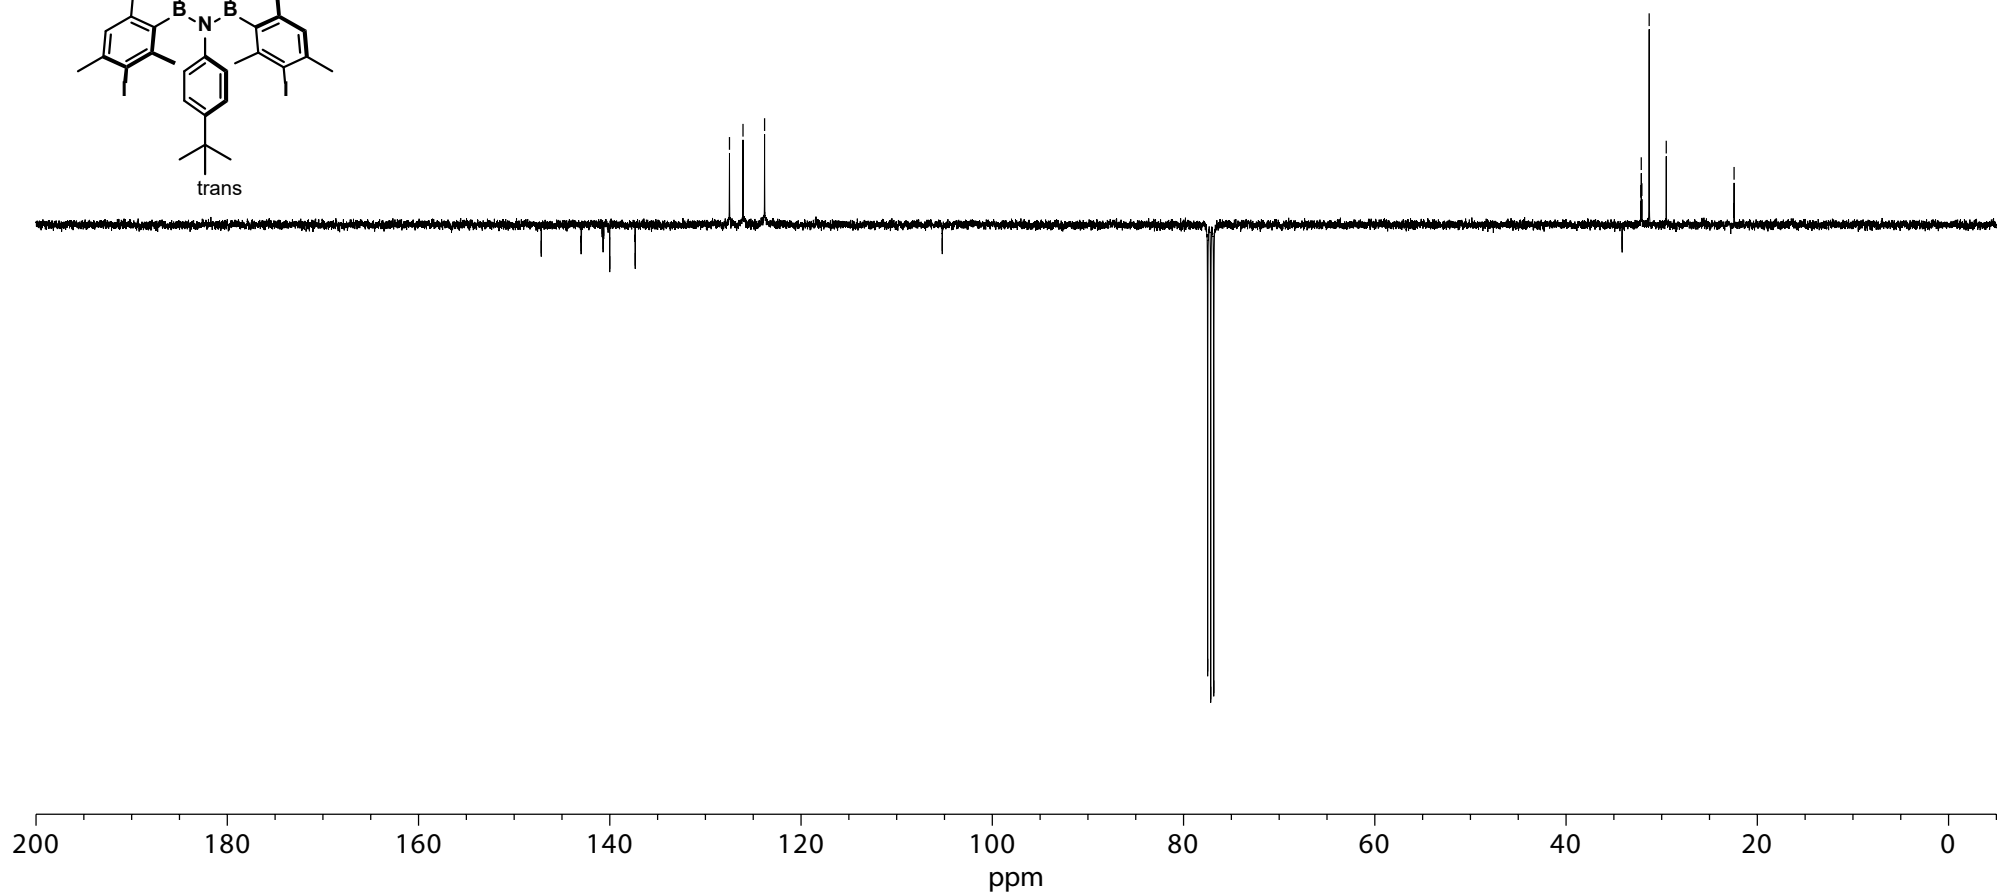

B,B',B''-Tris(3-iodo-2,4,6-trimethylphenyl)-N,N',N''-tris(4-tertbutylphenyl)borazine-(13)

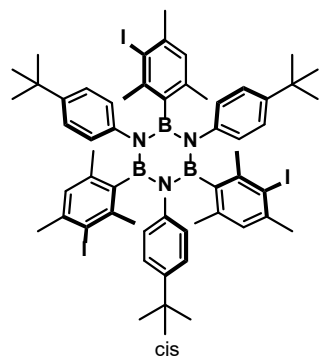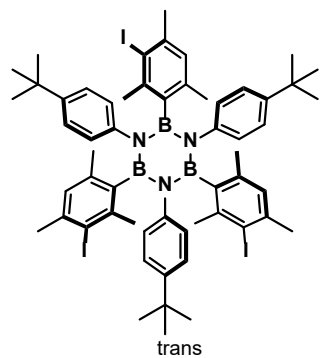

— 36.6

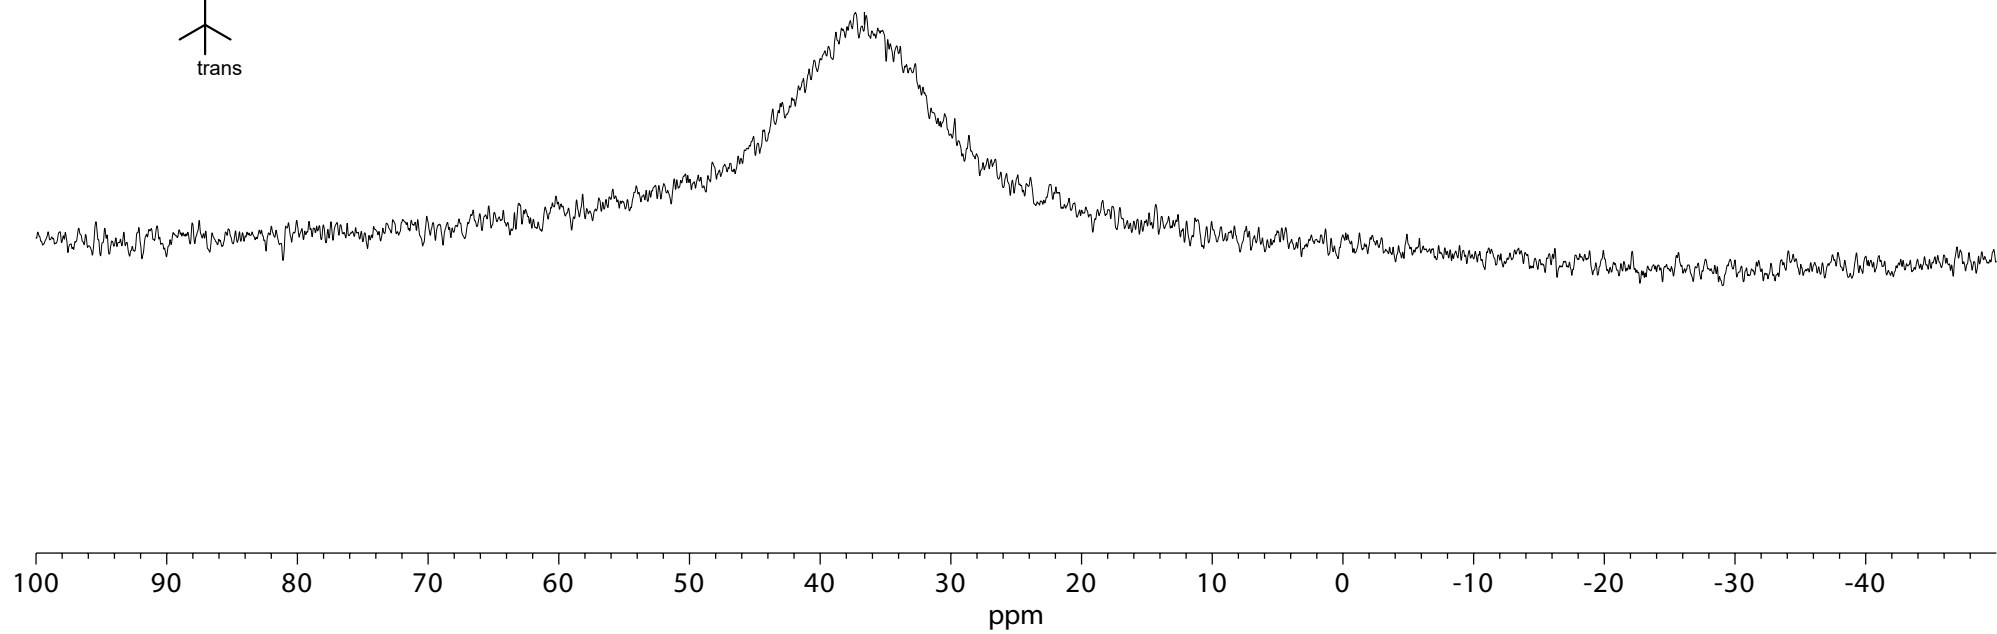

B,B',B''-Tris(4-iodo-2,3,5,6-tetramethylphenyl)-N,N',N''-tris(4-tertbutylphenyl)borazine-(14)

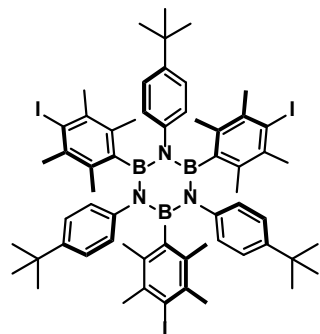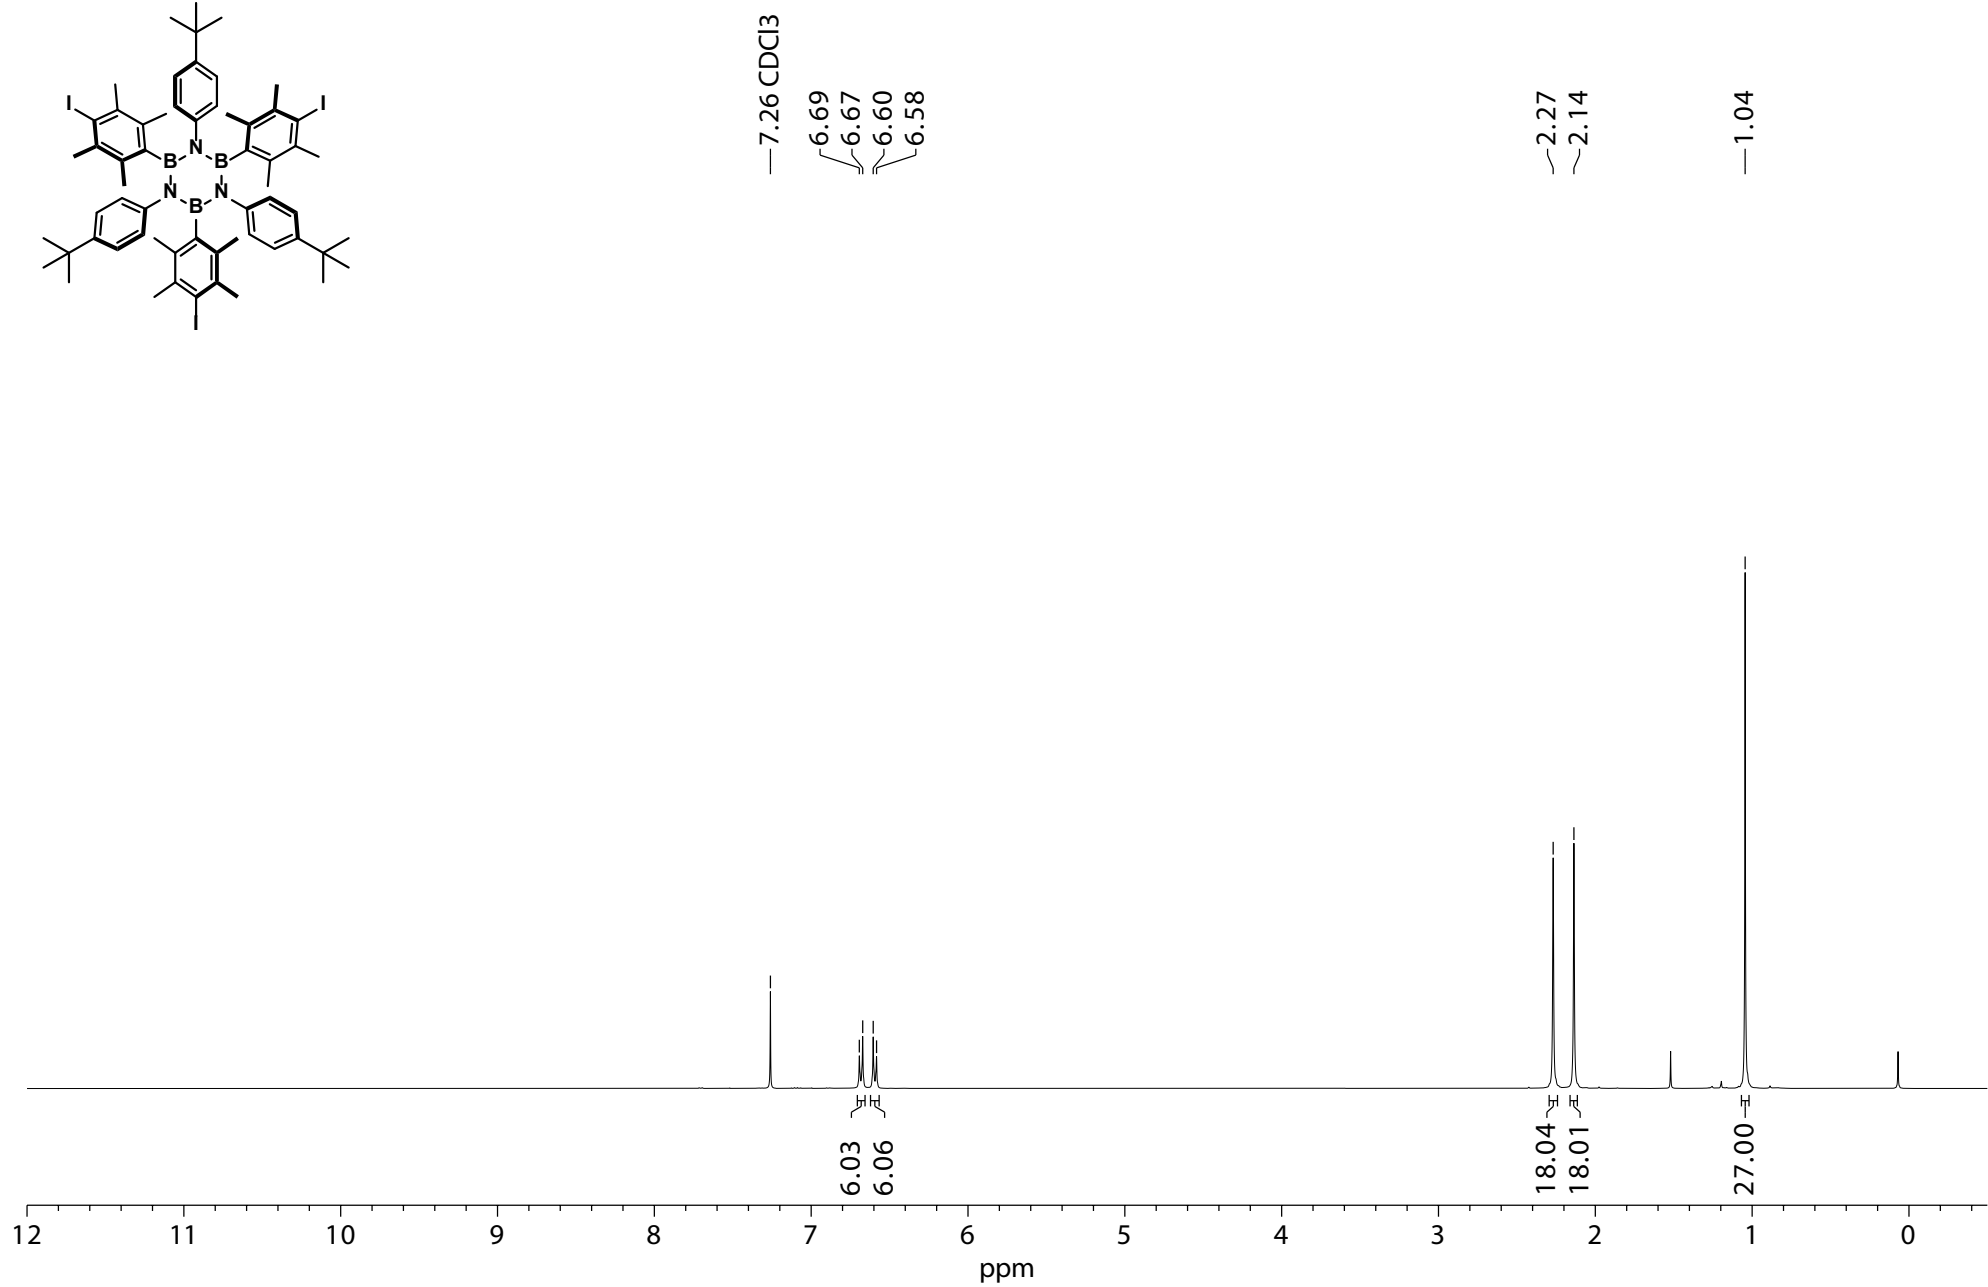



B,B',B''-Tris(4-iodo-2,3,5,6-tetramethylphenyl)-N,N',N''-tris(4-tertbutylphenyl)borazine-(14)

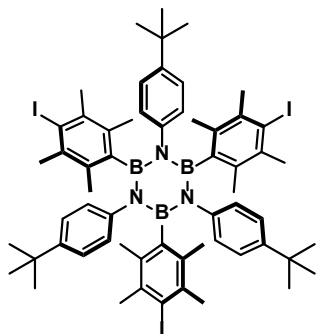

— 147.06  
— 143.34  
~ 135.89  
~ 134.07  
~ 126.04  
~ 123.63  
— 110.73

{ 77.48 CDCl3  
77.16 CDCl3  
76.84 CDCl3

~ 34.15  
~ 31.36  
~ 26.77  
~ 23.75

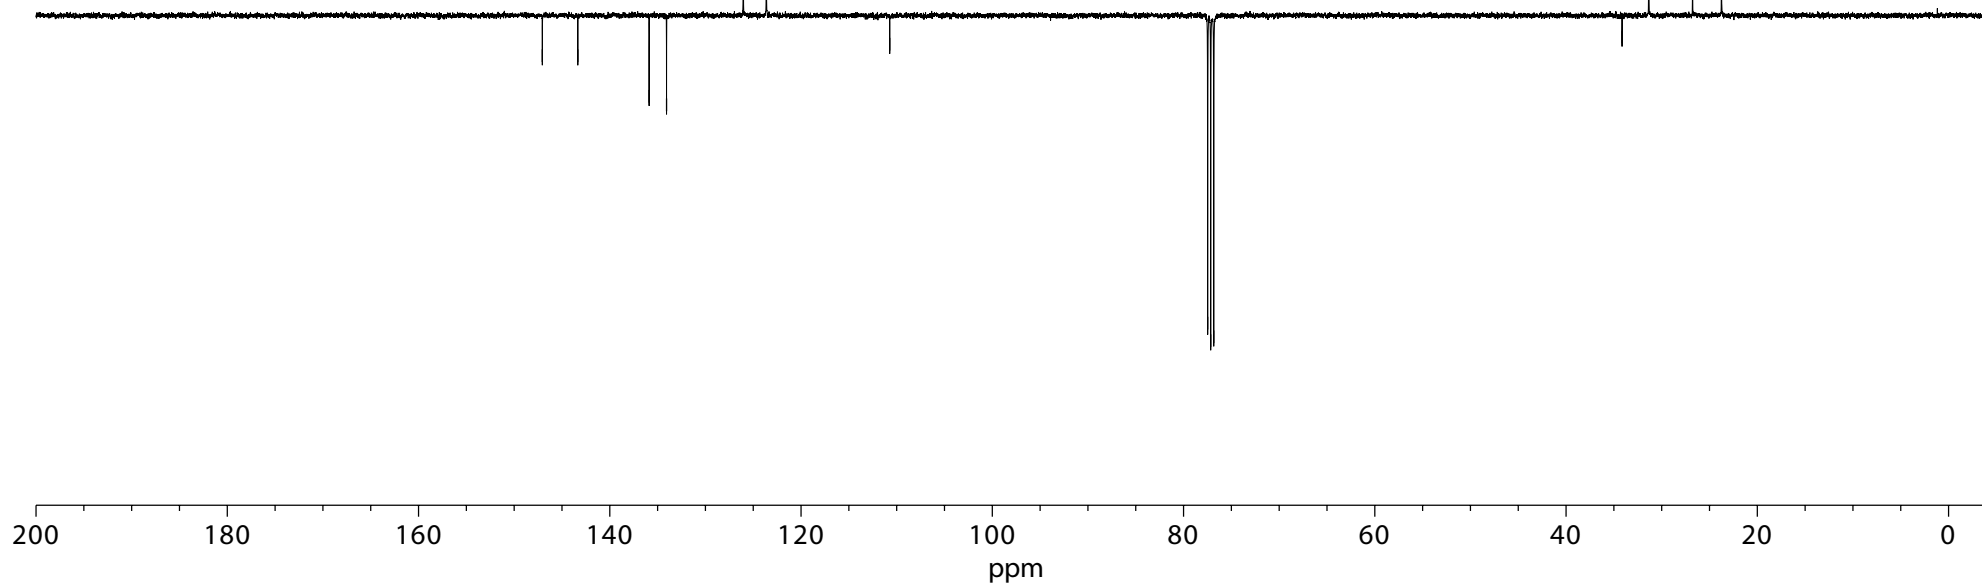

B,B',B''-Tris(4-iodo-2,3,5,6-tetramethylphenyl)-N,N',N''-tris(4-tertbutylphenyl)borazine-(14)



—36.9

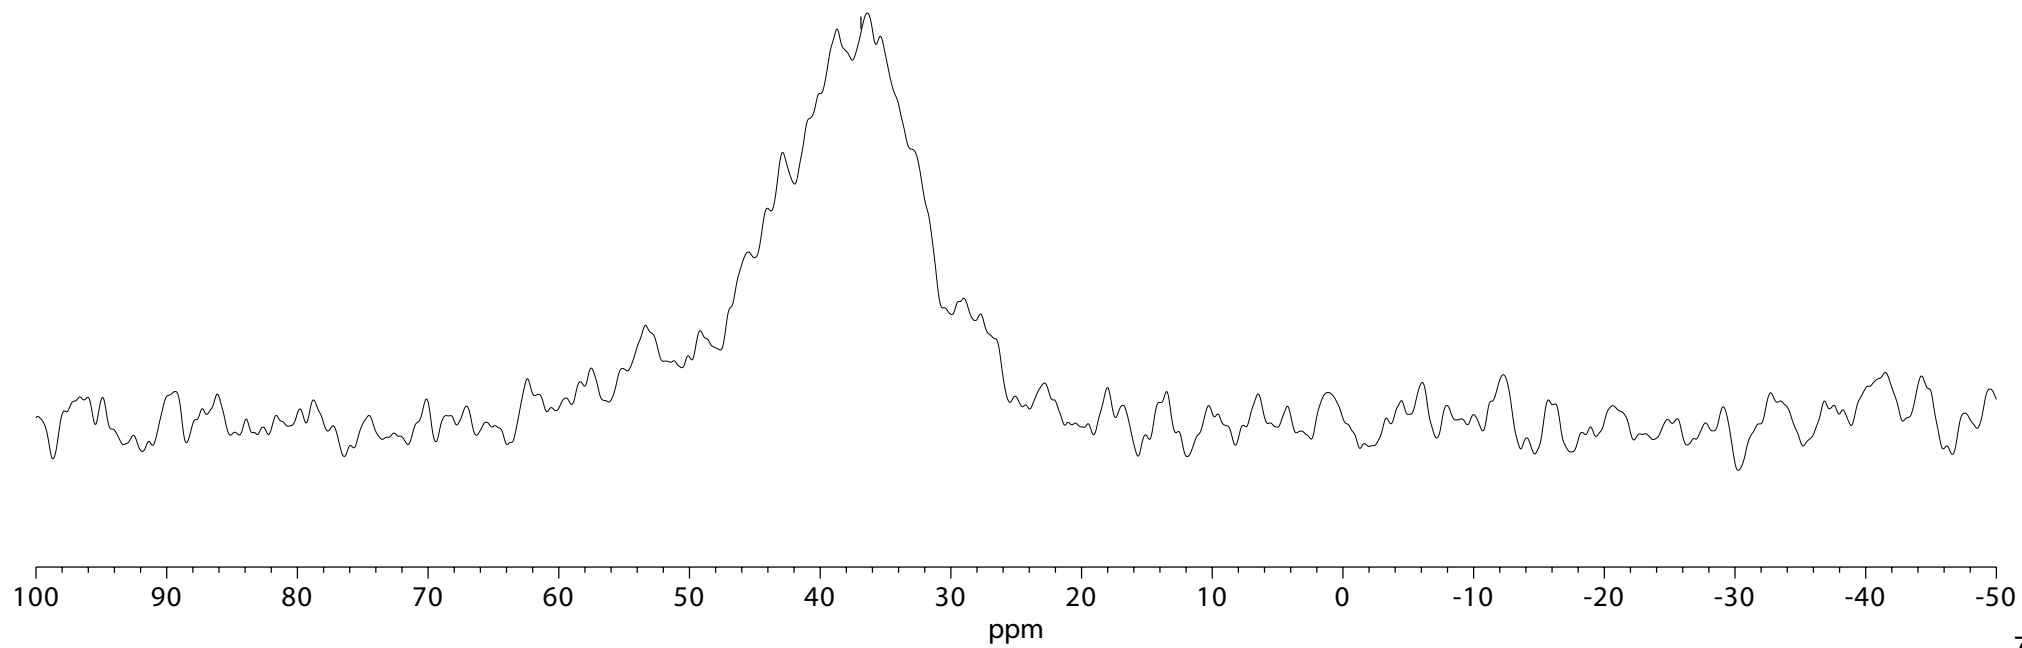

B,B',B''-Tris(3,5-diiodo-2,4,6-trimethylphenyl)-N,N',N''-tris(4-tertbutylphenyl)borazine-(15)

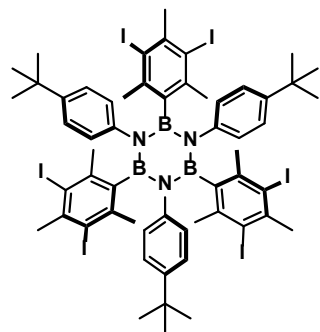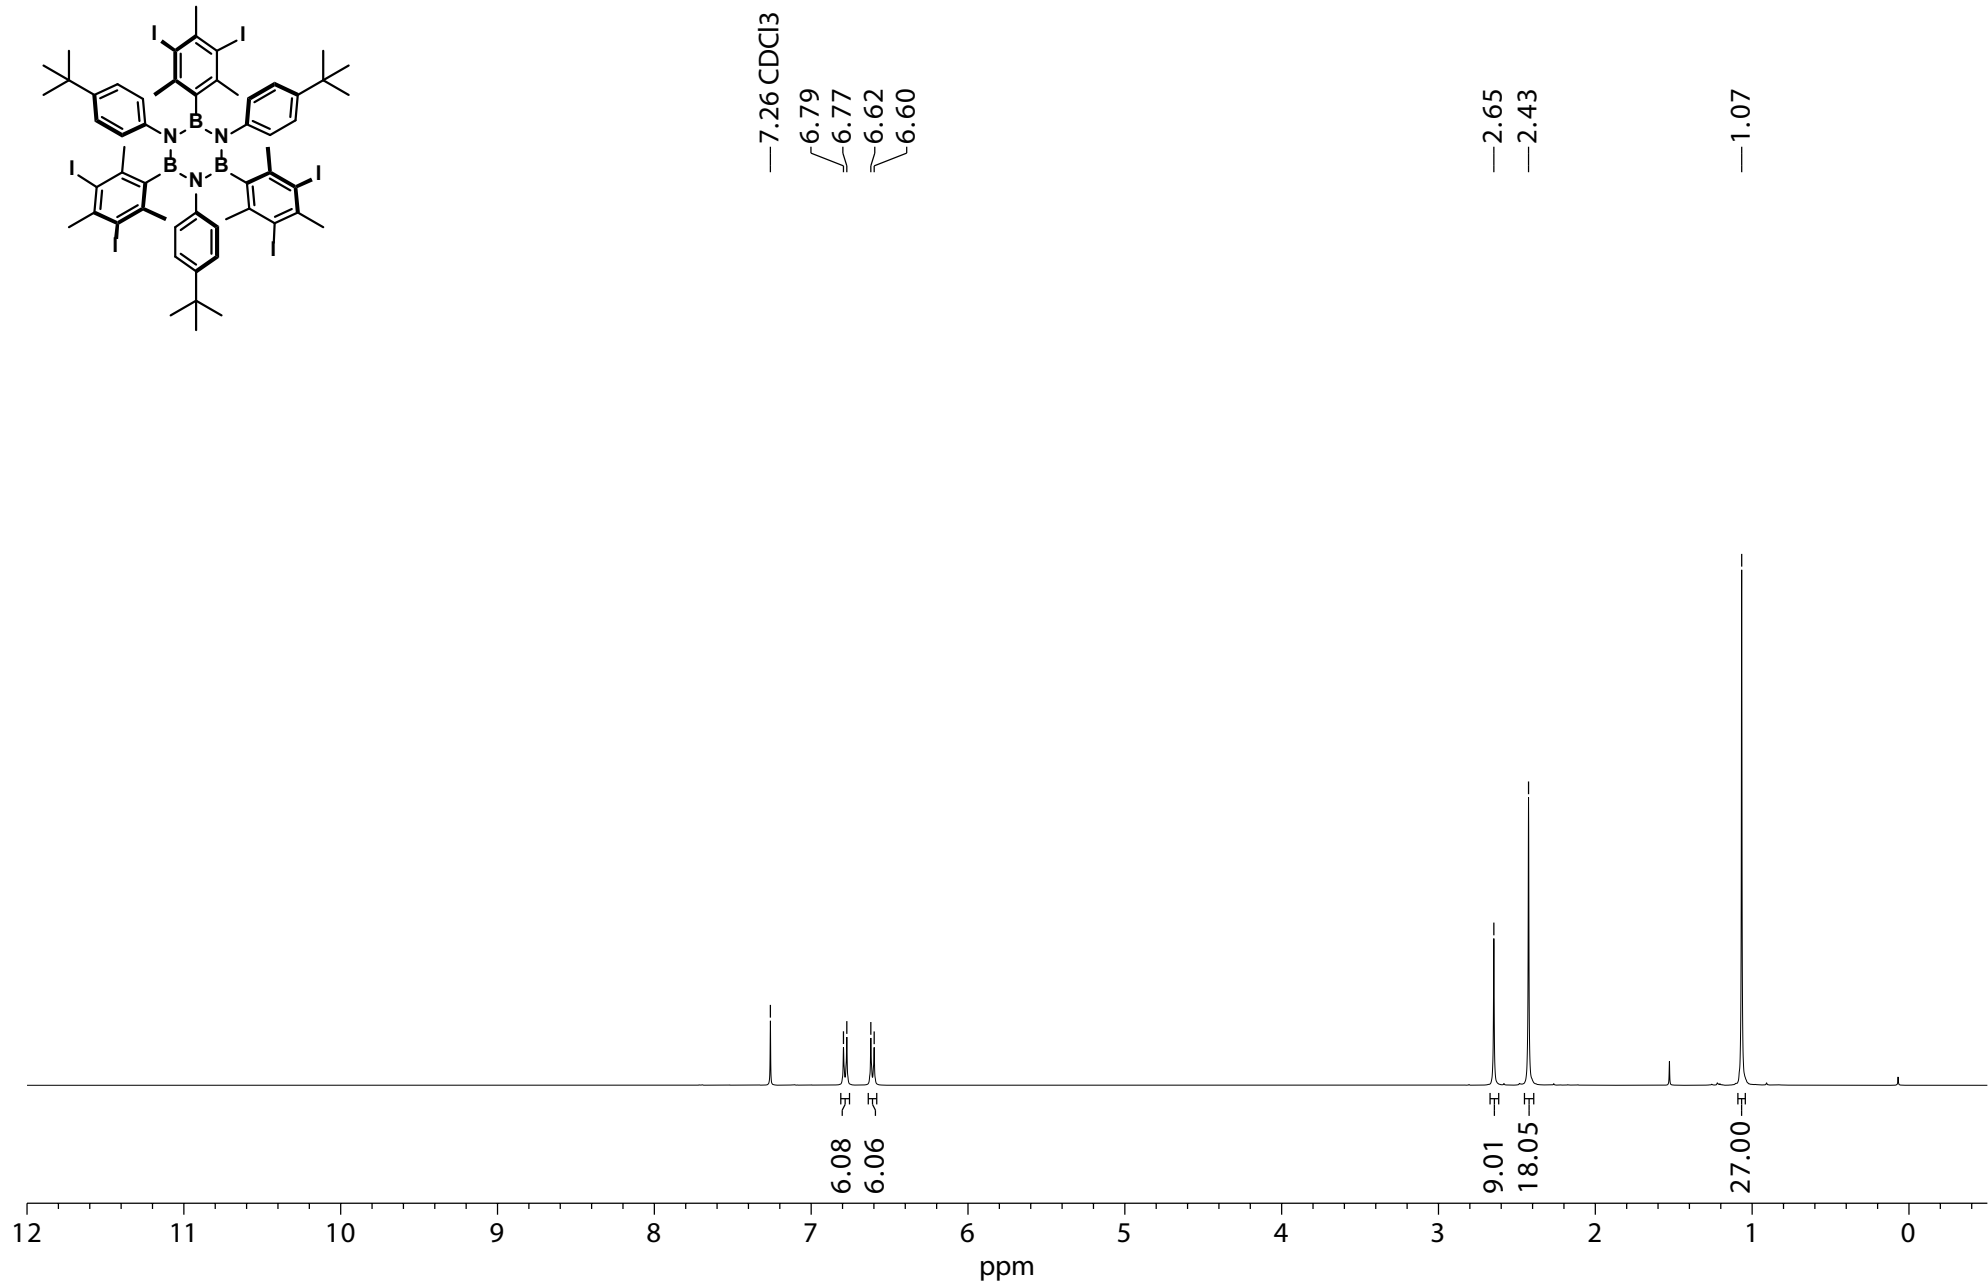

B,B',B''-Tris(3,5-diiodo-2,4,6-trimethylphenyl)-N,N',N''-tris(4-tertbutylphenyl)borazine-(15)

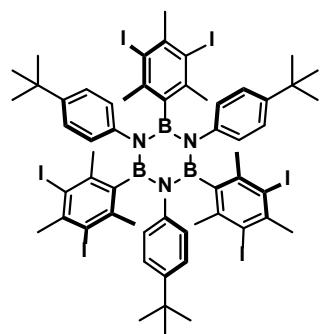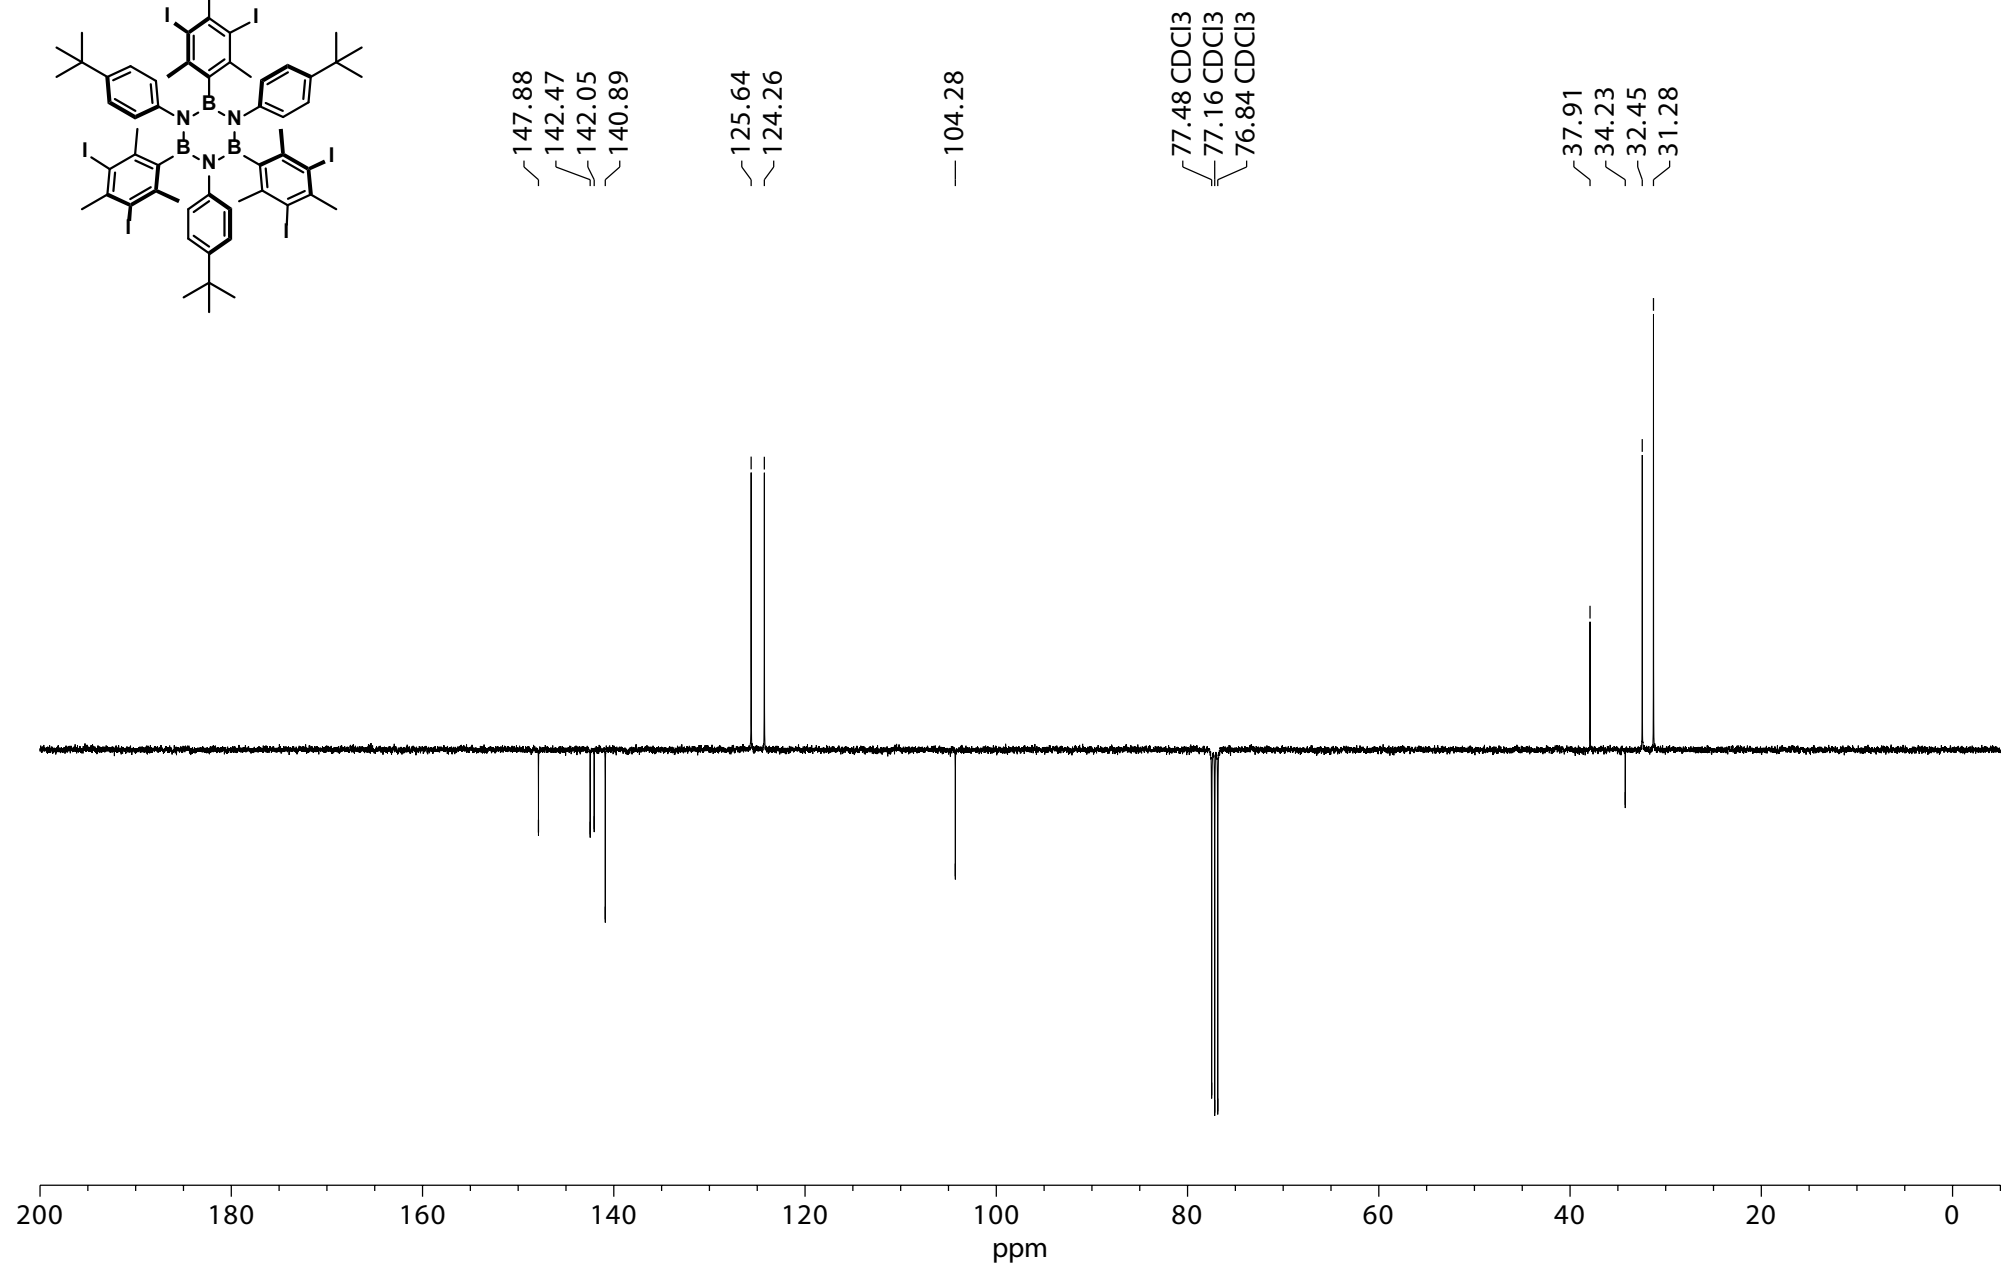

B,B',B''-Tris(3,5-diiodo-2,4,6-trimethylphenyl)-N,N',N''-tris(4-tertbutylphenyl)borazine-(15)

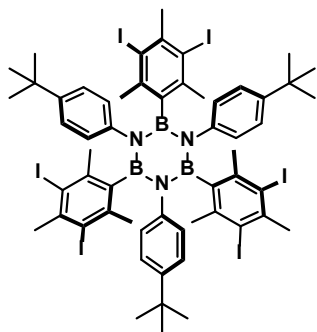

—37.3

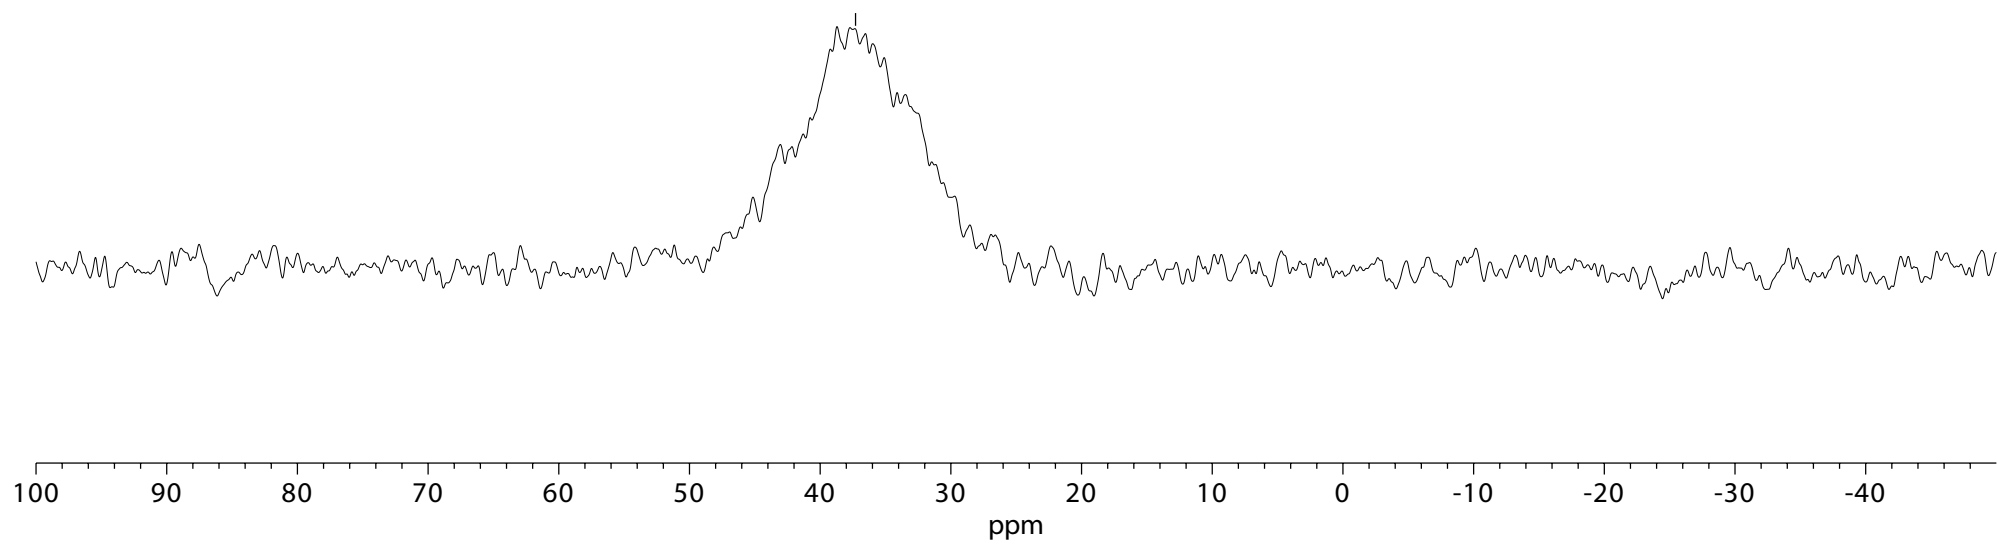

B,B',B''-Tris(3,5-diiodo-2,4,6-trimethylphenyl)-N,N',N''-tris(4-isopropylphenyl)borazine-(16)

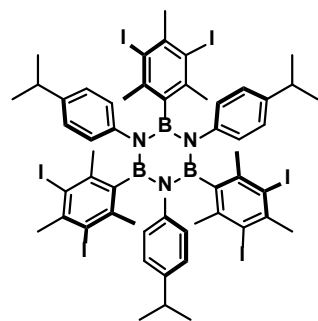

— 7.26 CDCl<sub>3</sub>

6.65  
6.63  
6.62  
6.60

2.65  
2.63  
2.61  
2.60  
2.58  
2.56  
2.42

0.99  
0.98

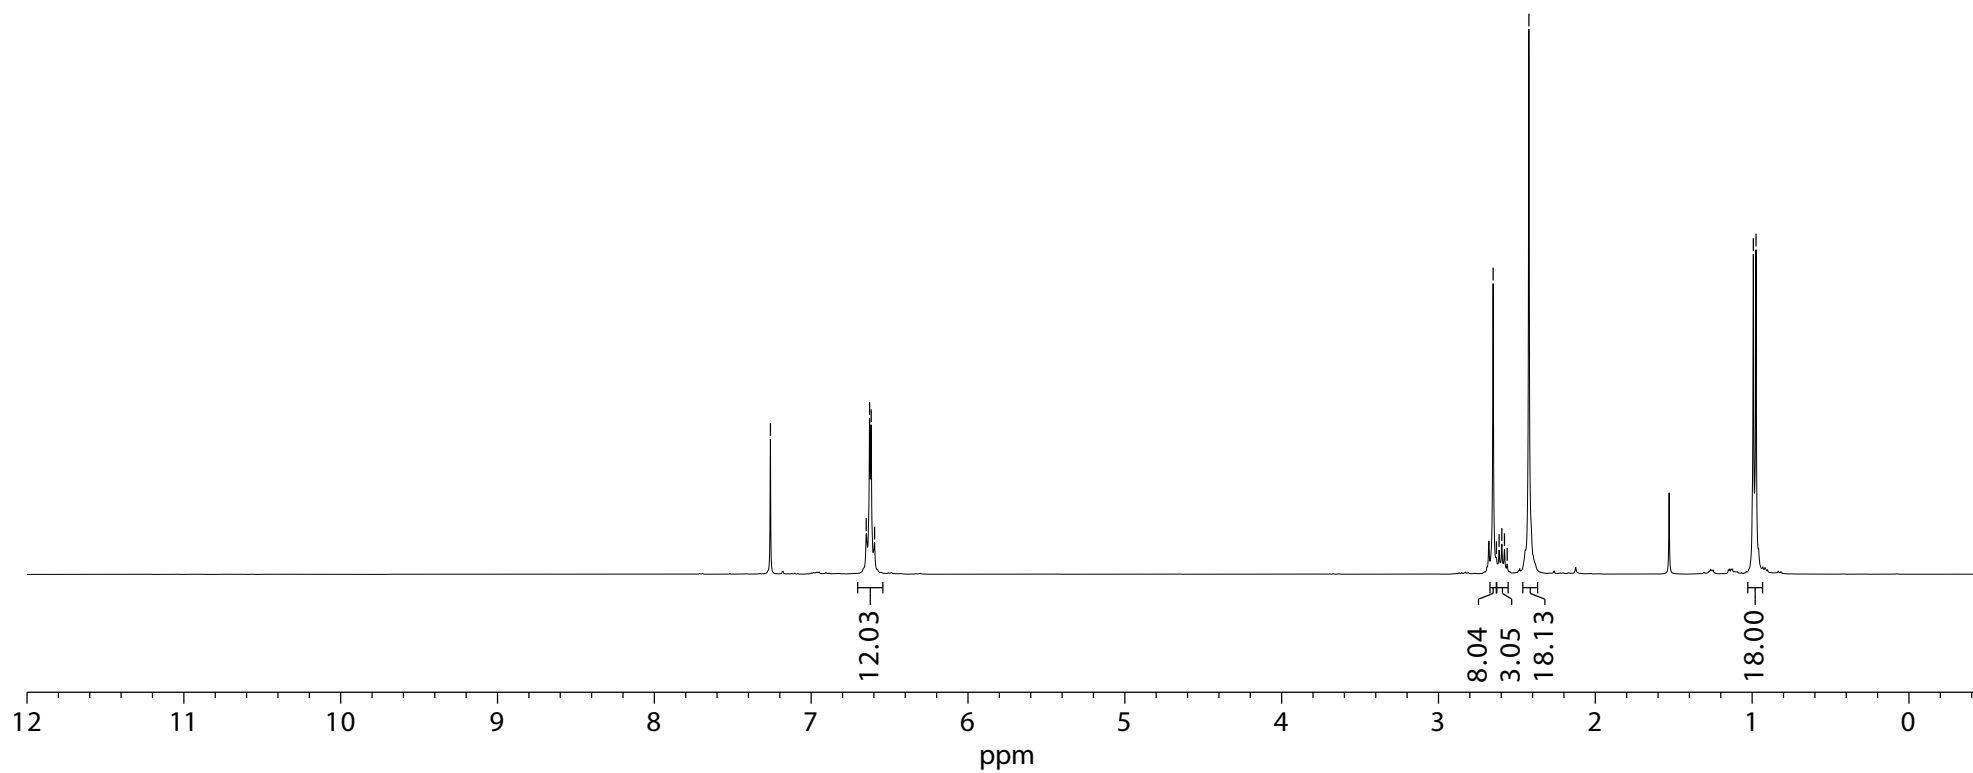

B,B',B''-Tris(3,5-diiodo-2,4,6-trimethylphenyl)-N,N',N''-tris(4-isopropylphenyl)borazine-(16)

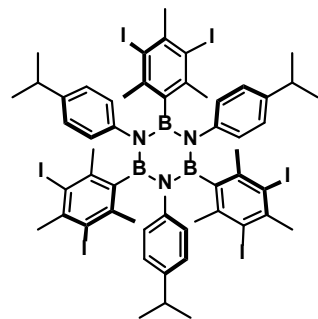

145.66  
142.81  
142.11  
140.82

125.93  
125.36

104.30

77.48 CDCl3  
77.16 CDCl3  
76.84 CDCl3

37.92  
33.40  
32.46

23.94

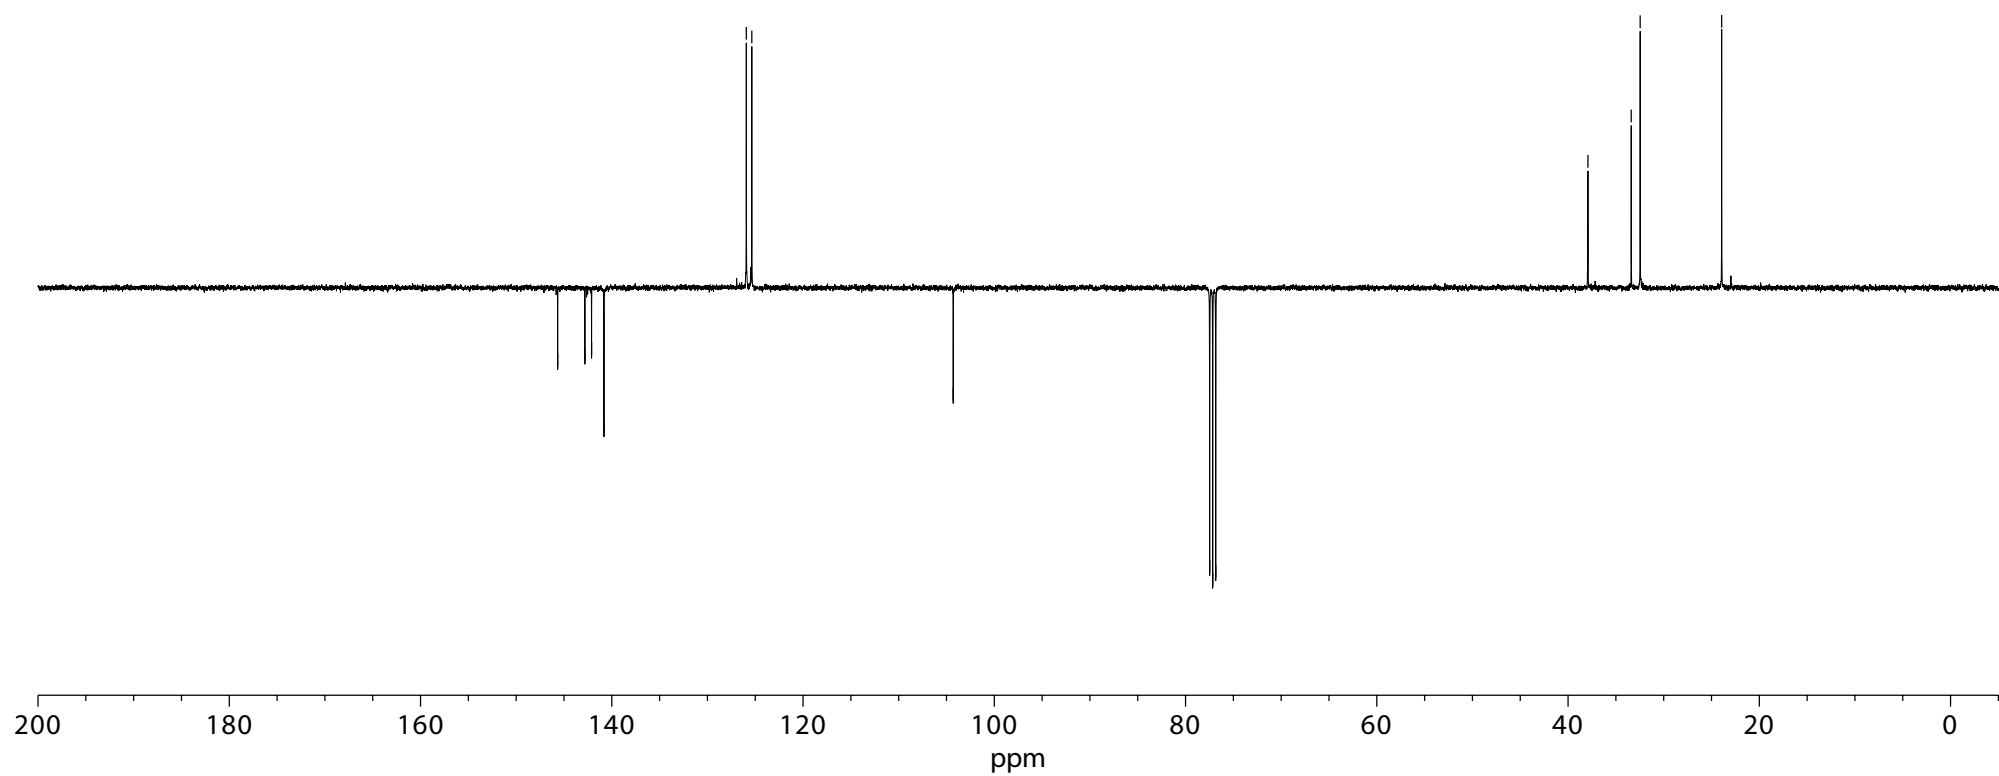

B,B',B''-Tris(3,5-diiodo-2,4,6-trimethylphenyl)-N,N',N''-tris(4-isopropylphenyl)borazine-(16)

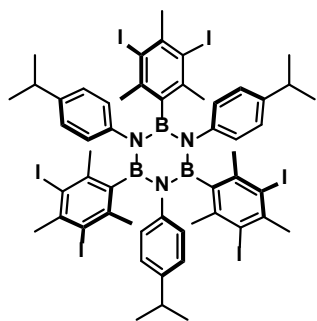

— 36.6

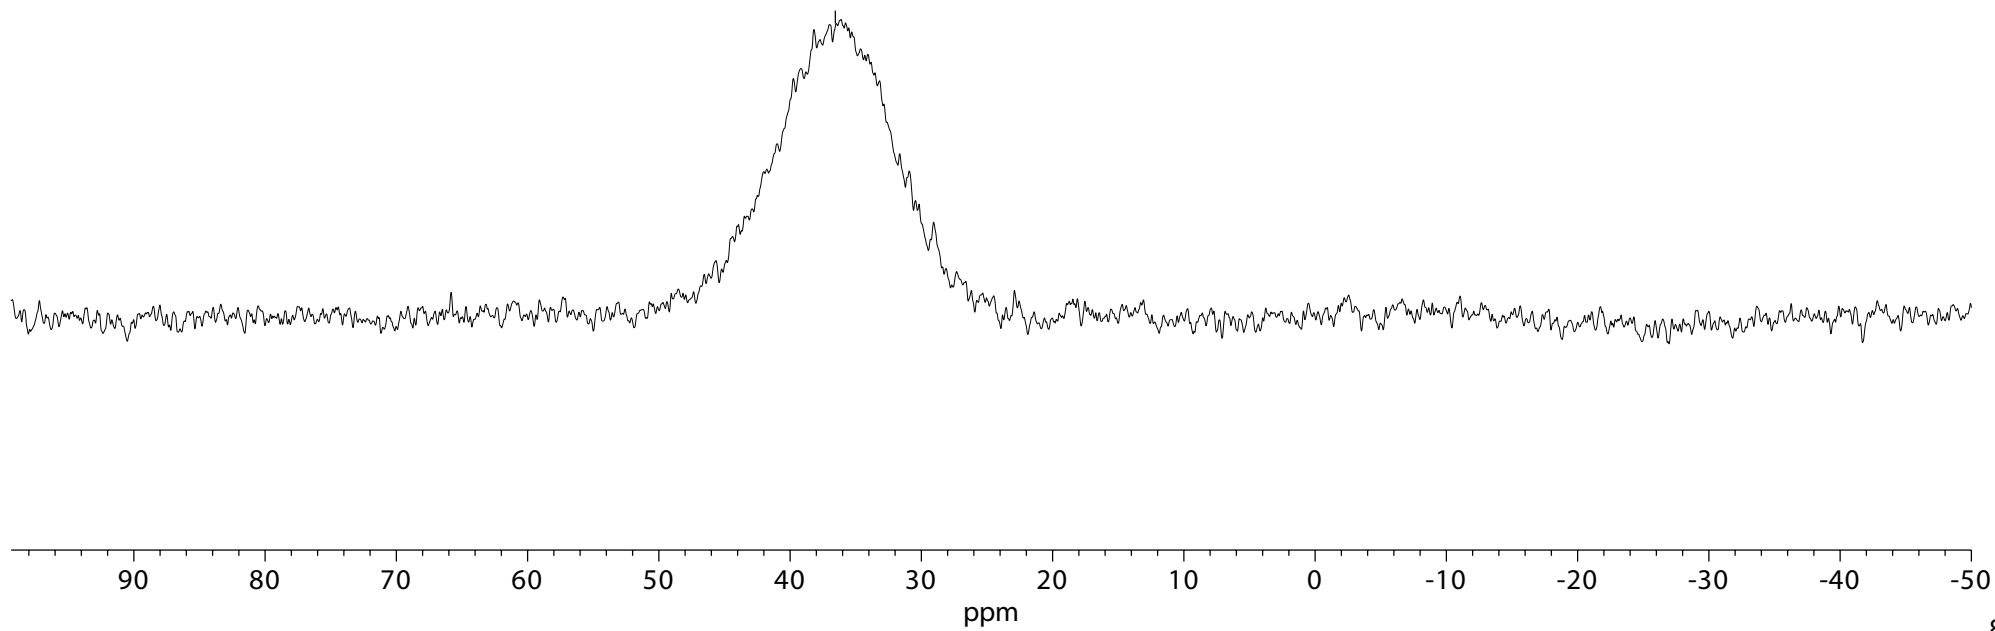



B,B',B''-Tris(3-iodo-2,4,6-trimethylphenyl)-N,N',N''-tris(4-isopropylphenyl)borazine-(17)

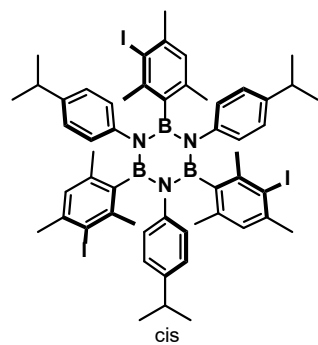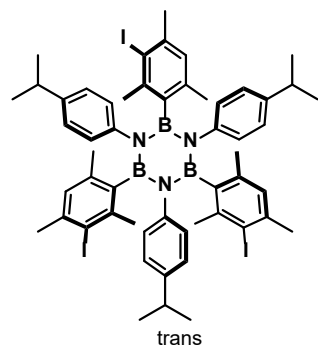

7.26 CDCl<sub>3</sub>  
 6.65  
 6.63  
 6.59  
 6.57  
 6.43  
 6.42  
 6.40

2.61  
 2.59  
 2.57  
 2.56  
 2.54  
 2.40  
 2.37  
 2.34  
 2.22  
 2.19  
 2.17  
 2.13  
 0.98  
 0.96

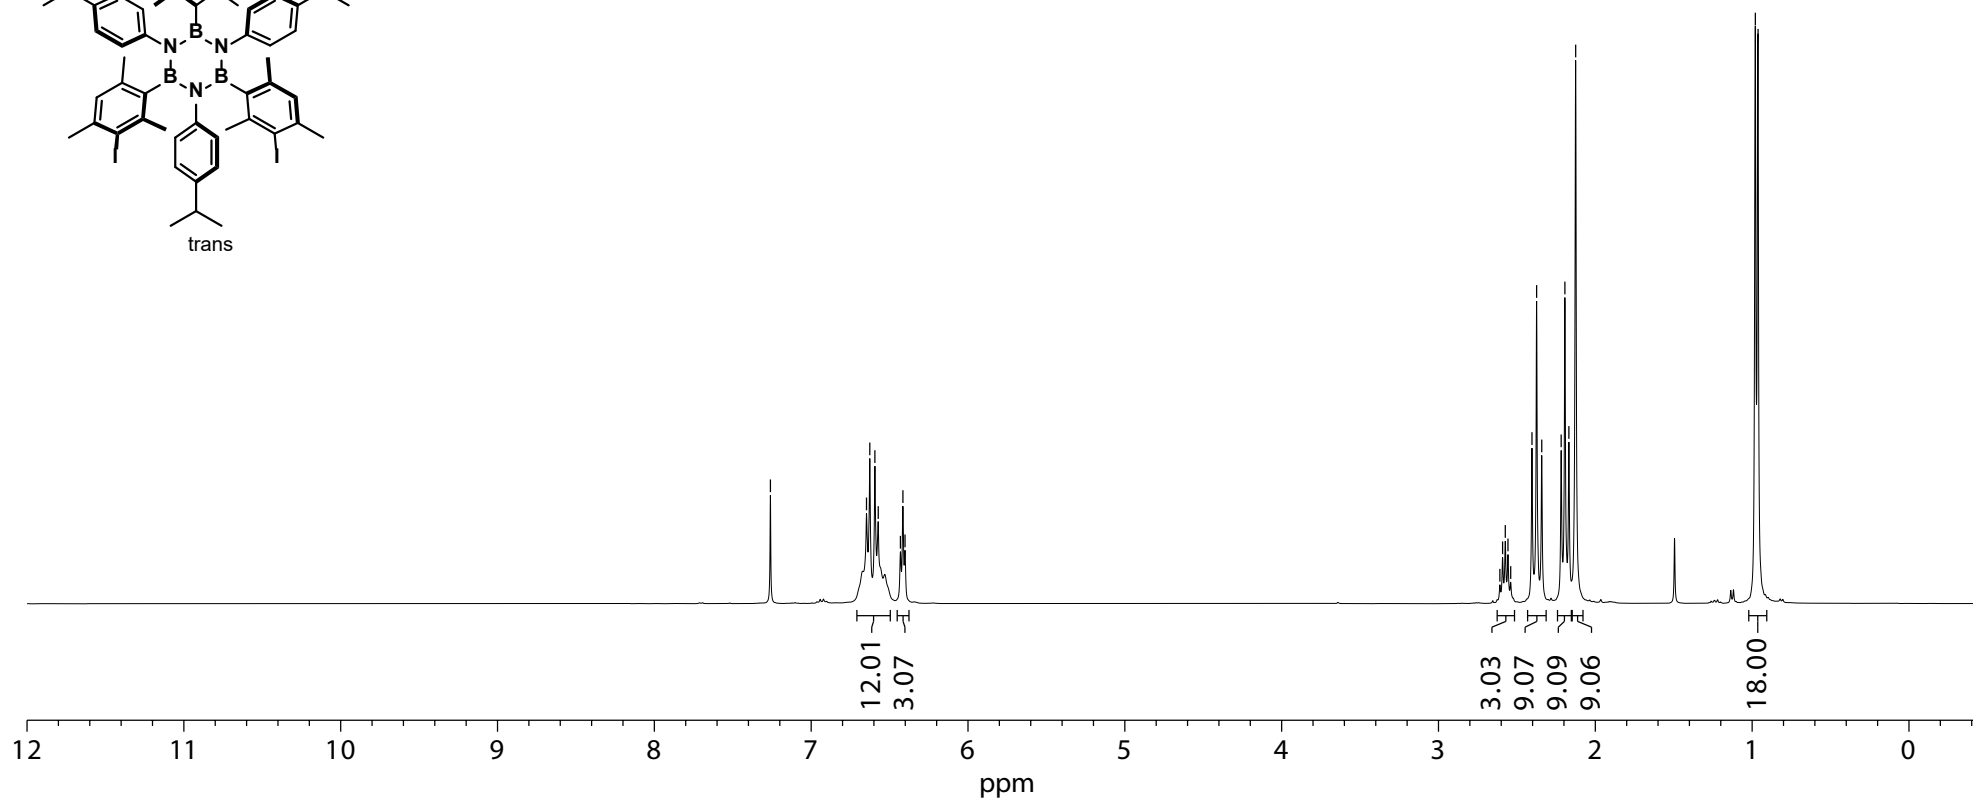

B,B',B''-Tris(3-iodo-2,4,6-trimethylphenyl)-N,N',N''-tris(4-isopropylphenyl)borazine-(17)

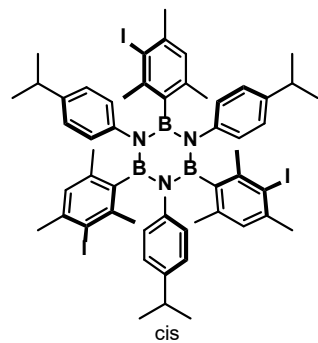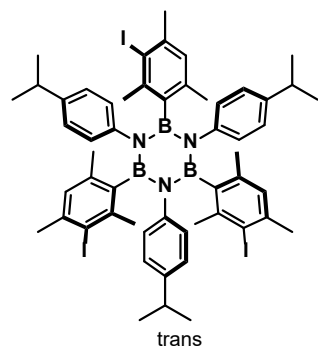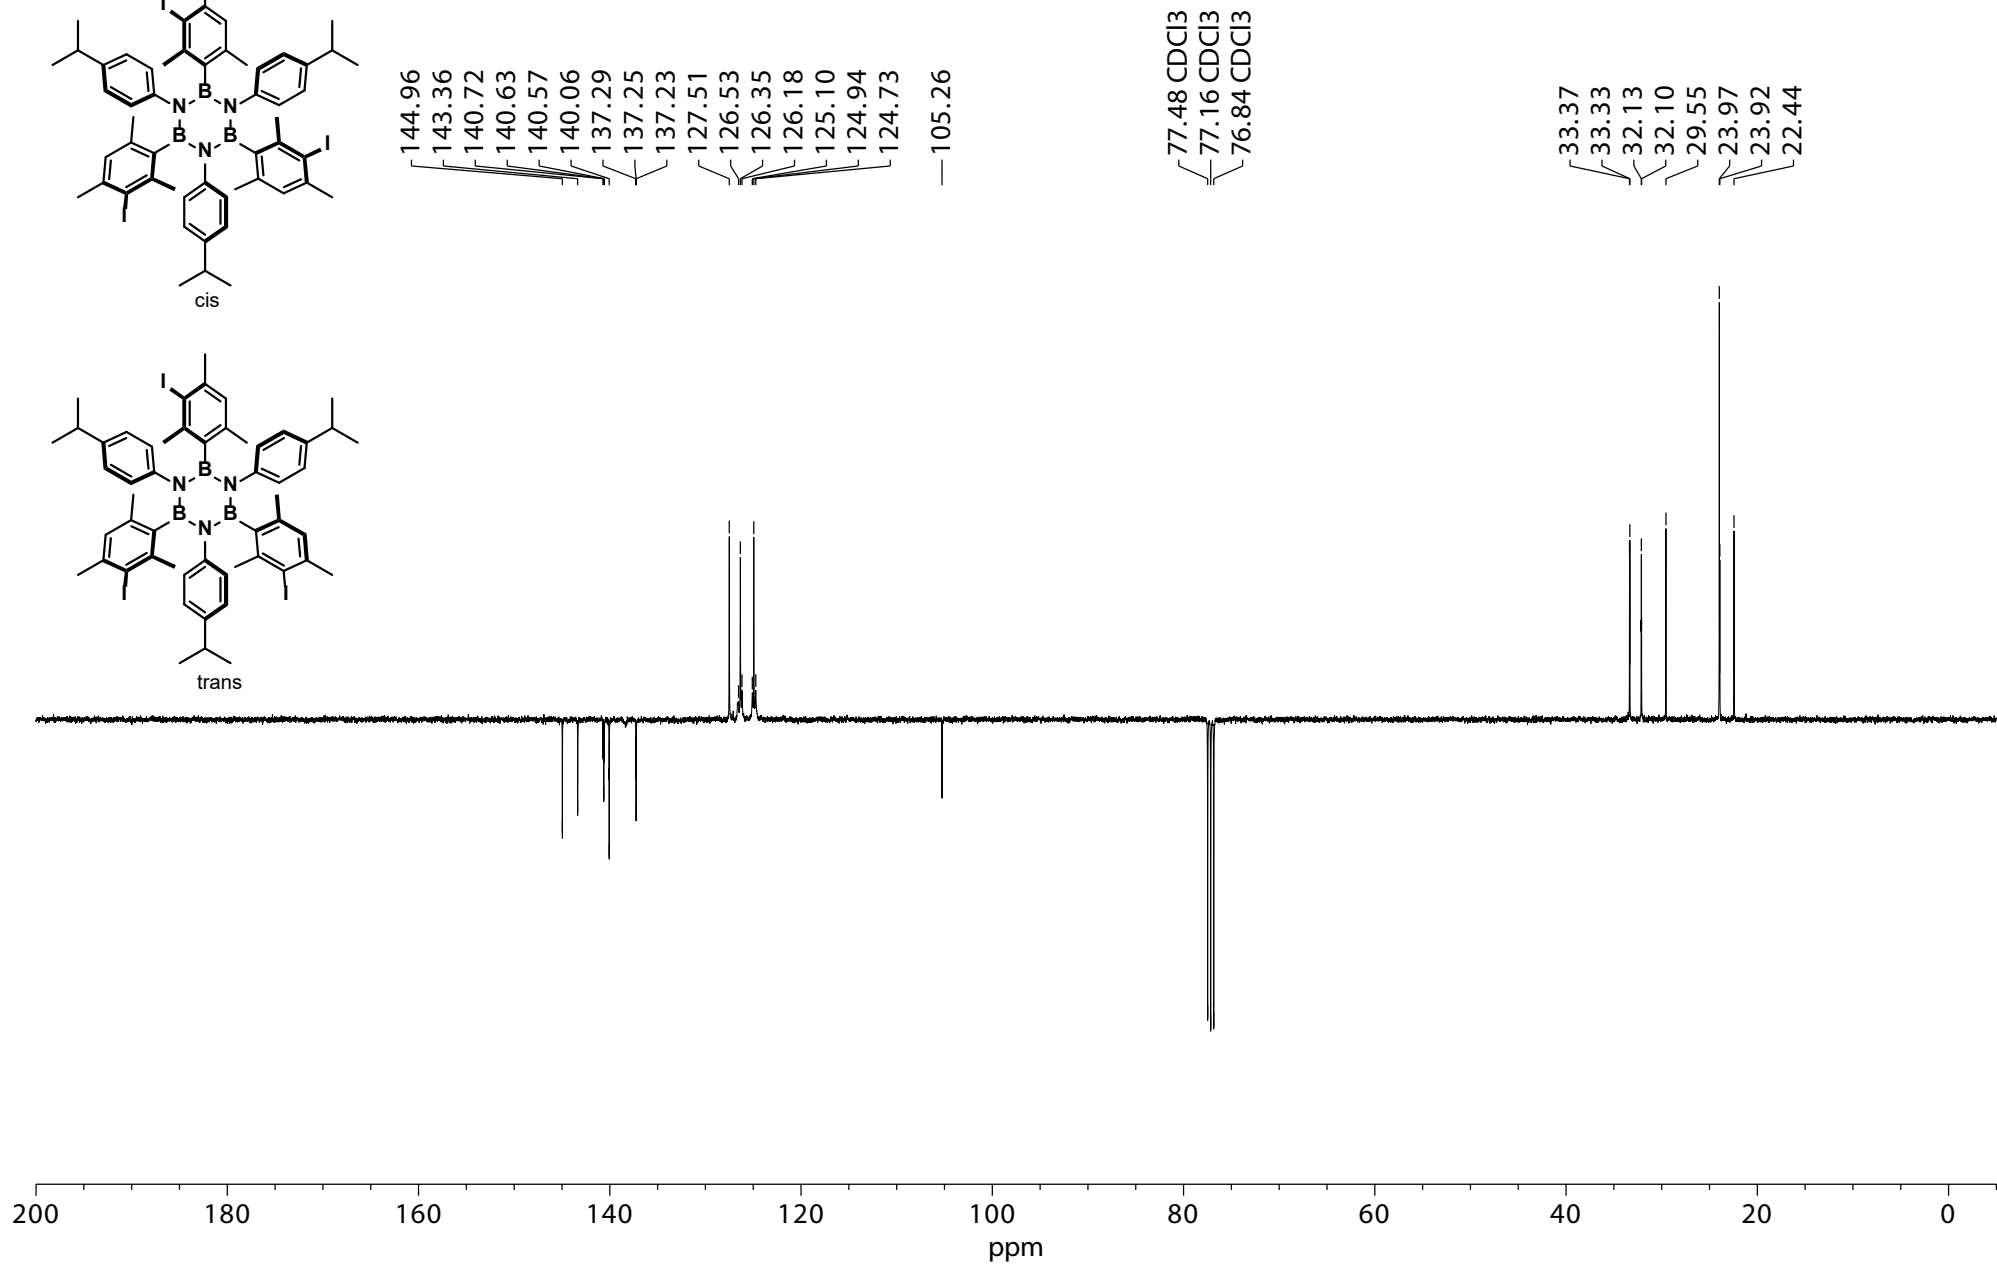

B,B',B''-Tris(3-iodo-2,4,6-trimethylphenyl)-N,N',N''-tris(4-isopropylphenyl)borazine-(17)

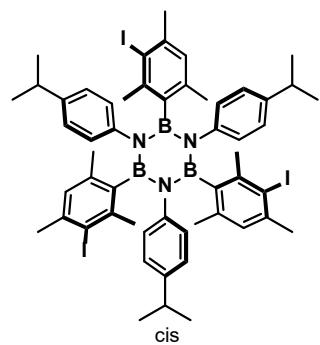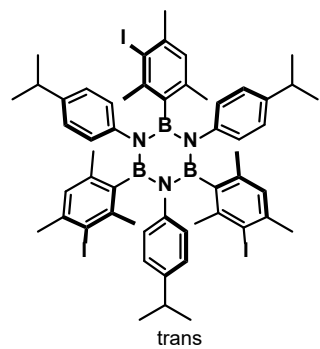

— 36.5

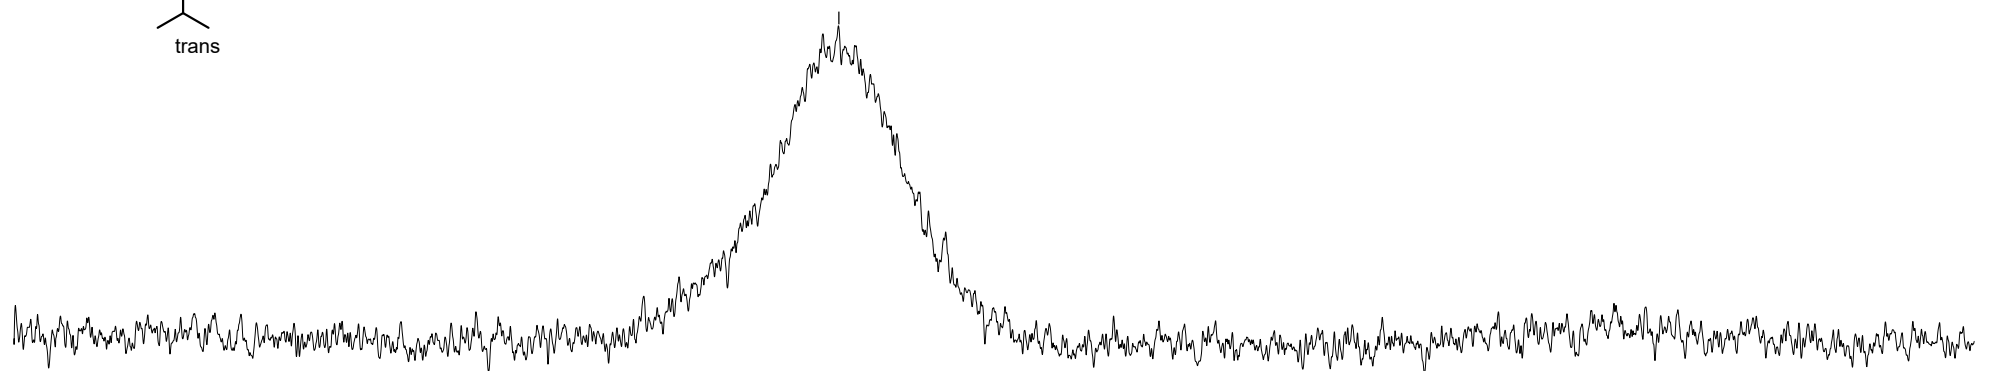

90

80

70

60

50

40

30

20

10

0

-10

-20

-30

-40

-50

ppm

B,B',B''-Tris(3-iodo-2,4,6-trimethylphenyl)-N,N',N''-tris(phenyl)borazine-(18)

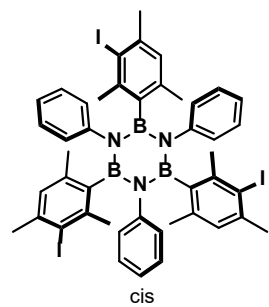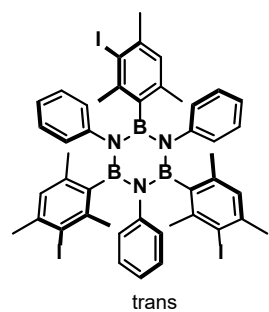

— 7.26 CDCl<sub>3</sub>

6.80  
6.79  
6.76  
6.41

2.47  
2.44  
2.42  
2.24  
2.22  
2.19  
2.12

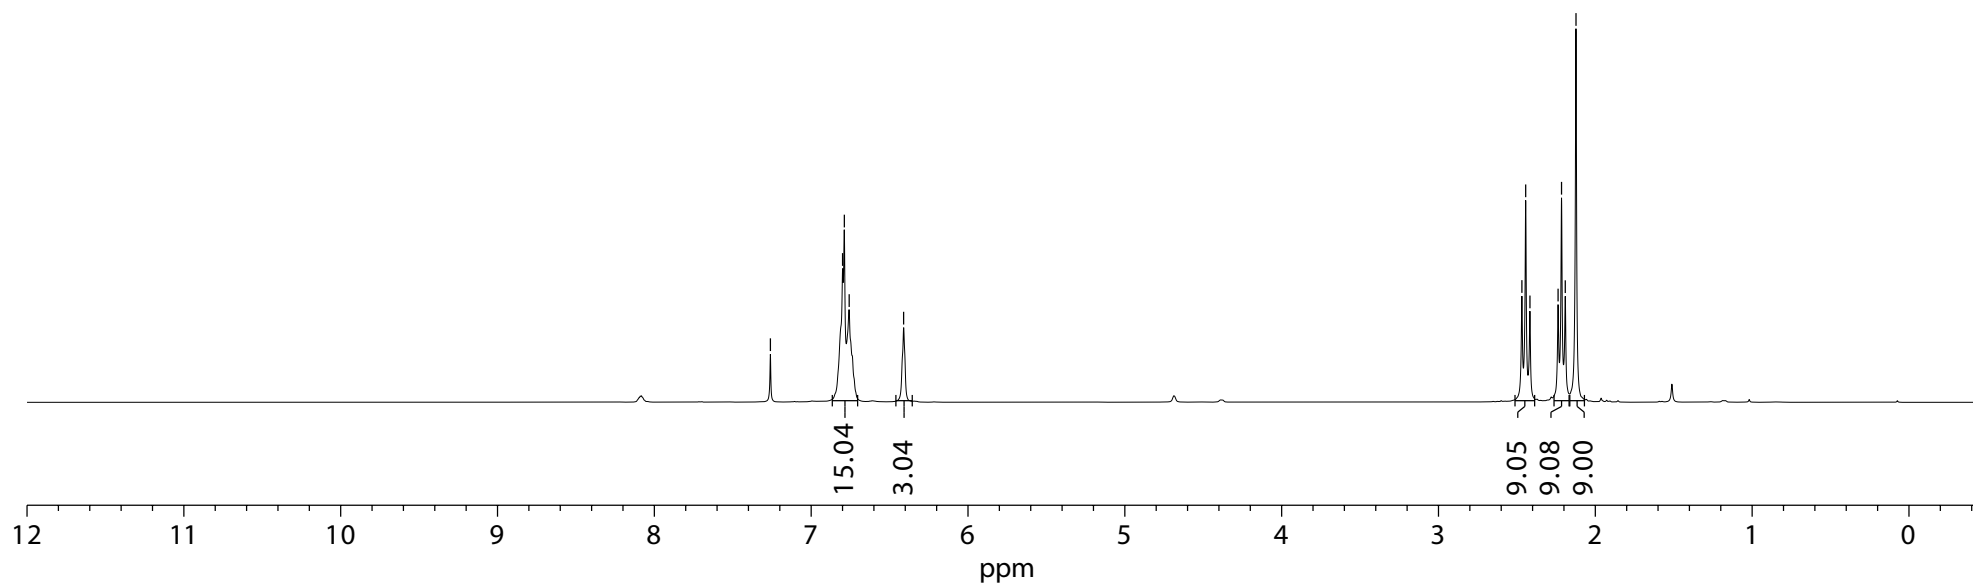

B,B',B''-Tris(3-iodo-2,4,6-trimethylphenyl)-N,N',N''-tris(phenyl)borazine-(18)

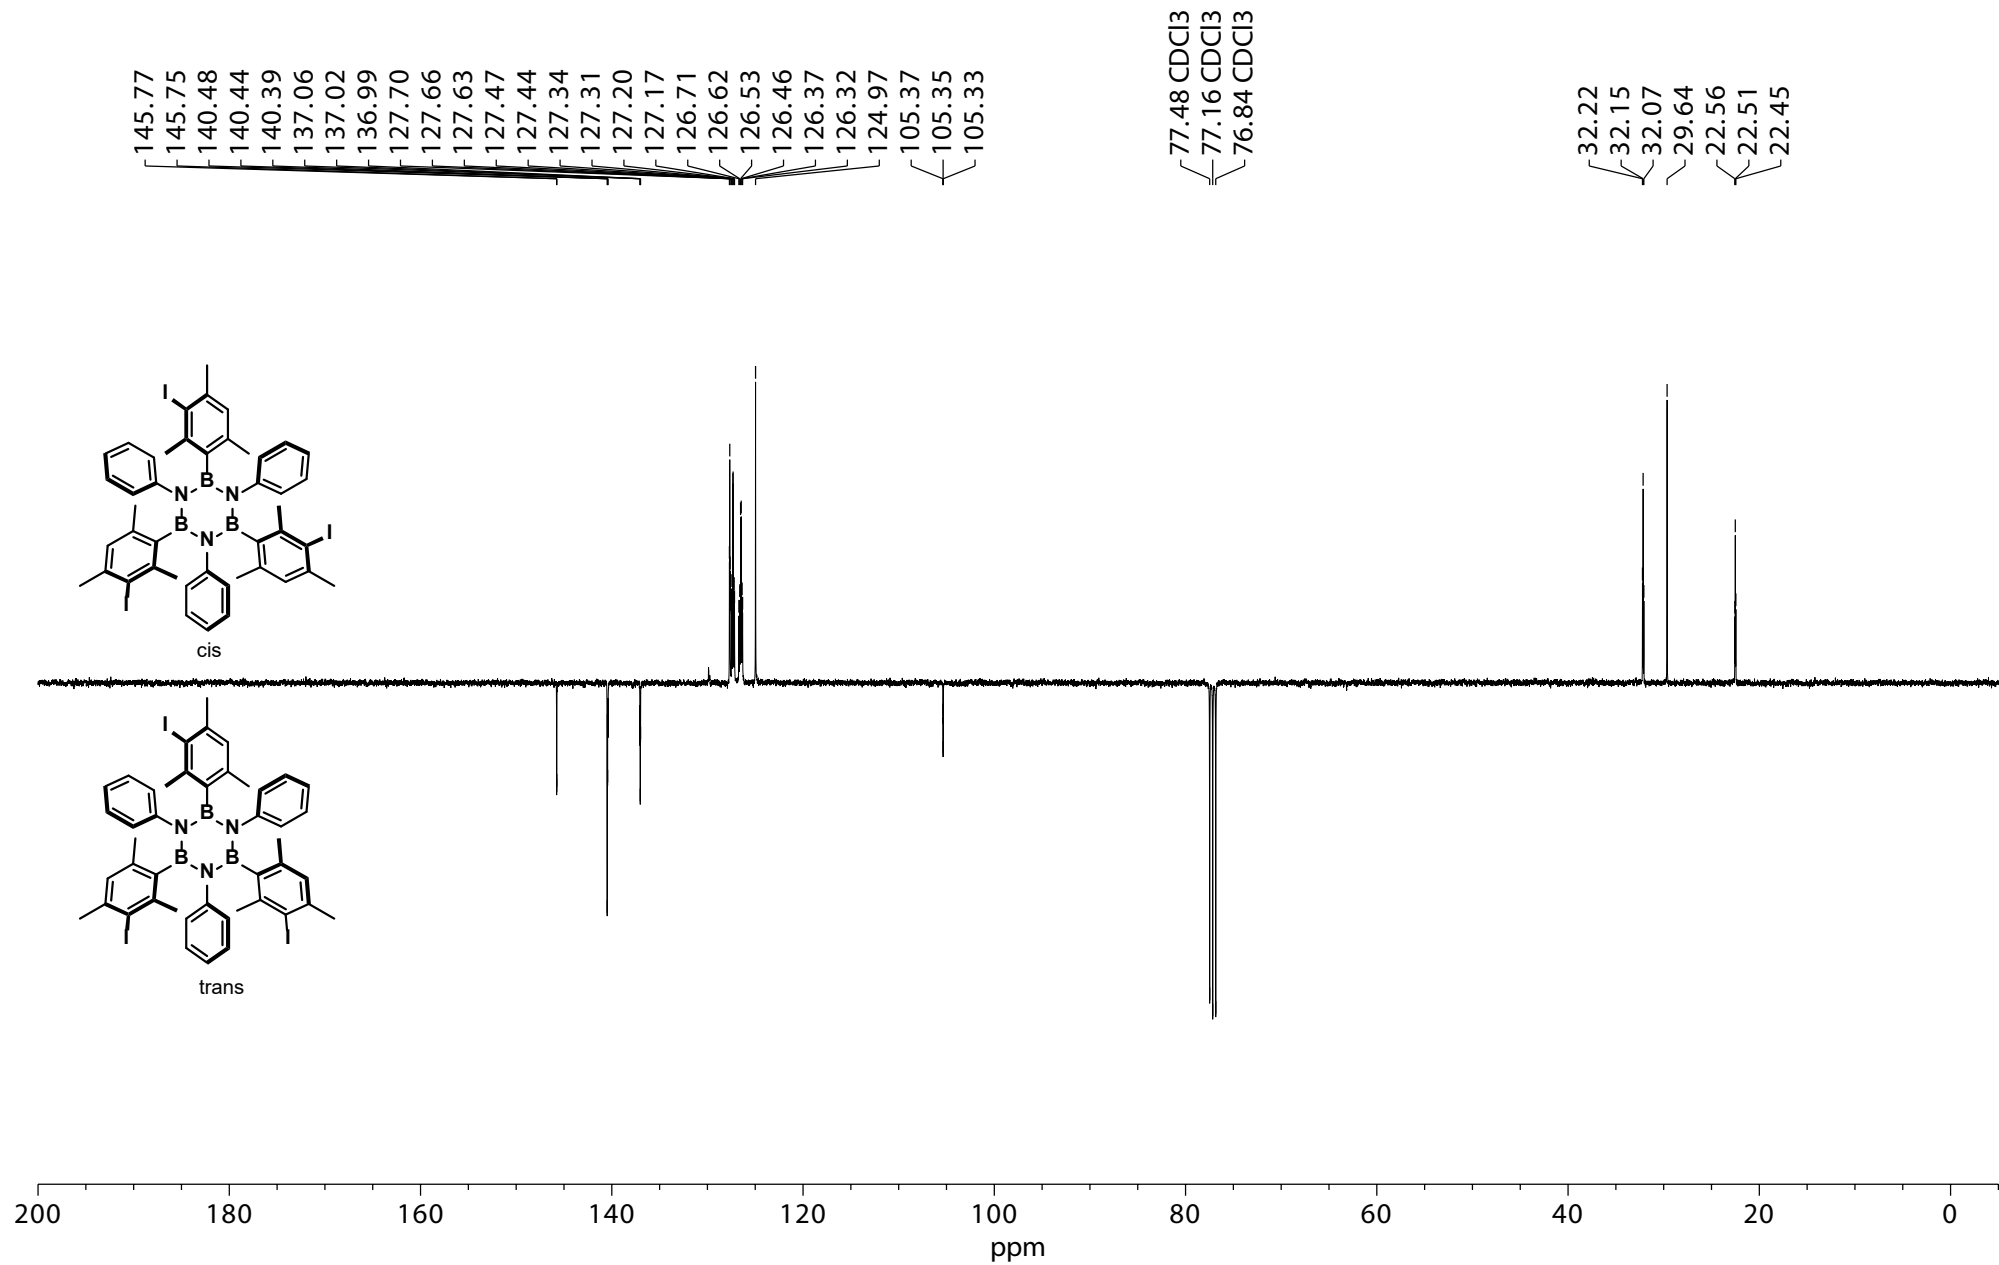

B,B',B''-Tris(3-iodo-2,4,6-trimethylphenyl)-N,N',N''-tris(phenyl)borazine-(18)

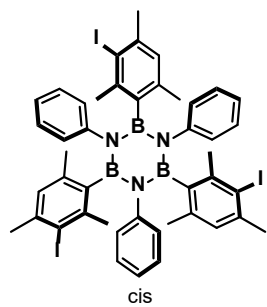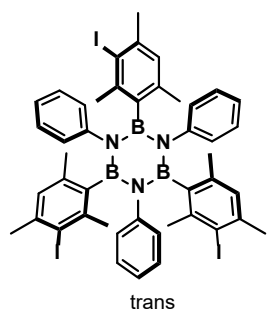

—37.2

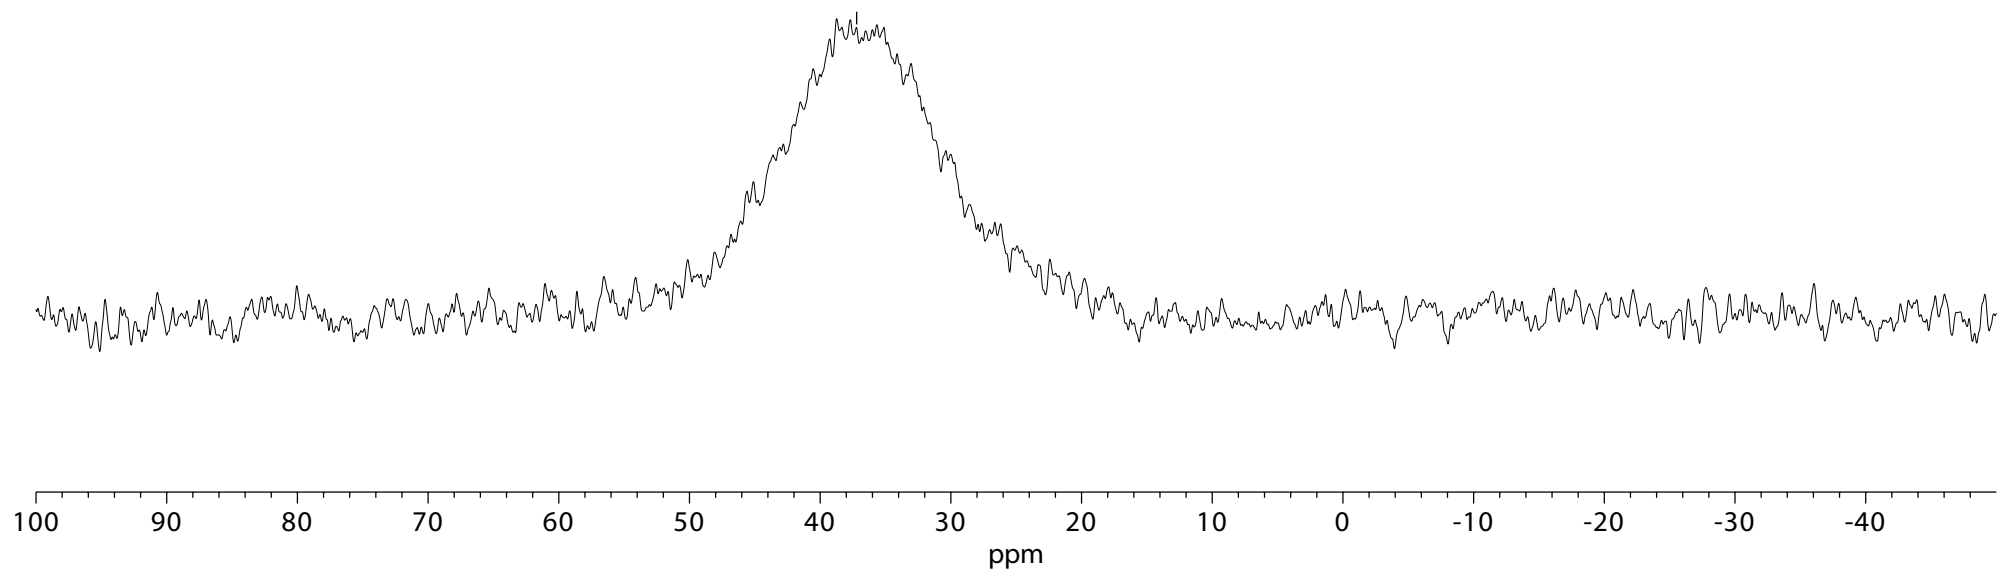

B,B',B''-Tris(3-iodo-2,6-dimethylphenyl)-N,N',N''-tris(4-isopropylphenyl)borazine-(19)

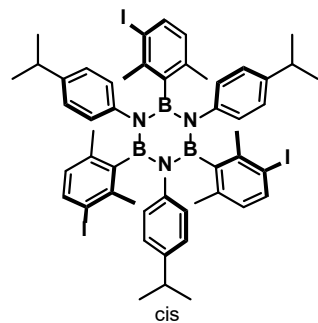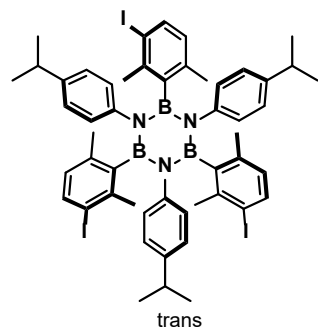

7.26 CDCl<sub>3</sub>  
 7.24  
 7.22  
 6.67  
 6.65  
 6.62  
 6.62  
 6.59  
 6.57  
 6.55  
 6.27  
 6.25  
 6.24  
 6.23  
 6.22

2.62  
 2.60  
 2.59  
 2.57  
 2.55  
 2.36  
 2.33  
 2.30  
 2.25  
 2.23  
 2.21  
 1.00  
 1.00  
 0.98  
 0.98

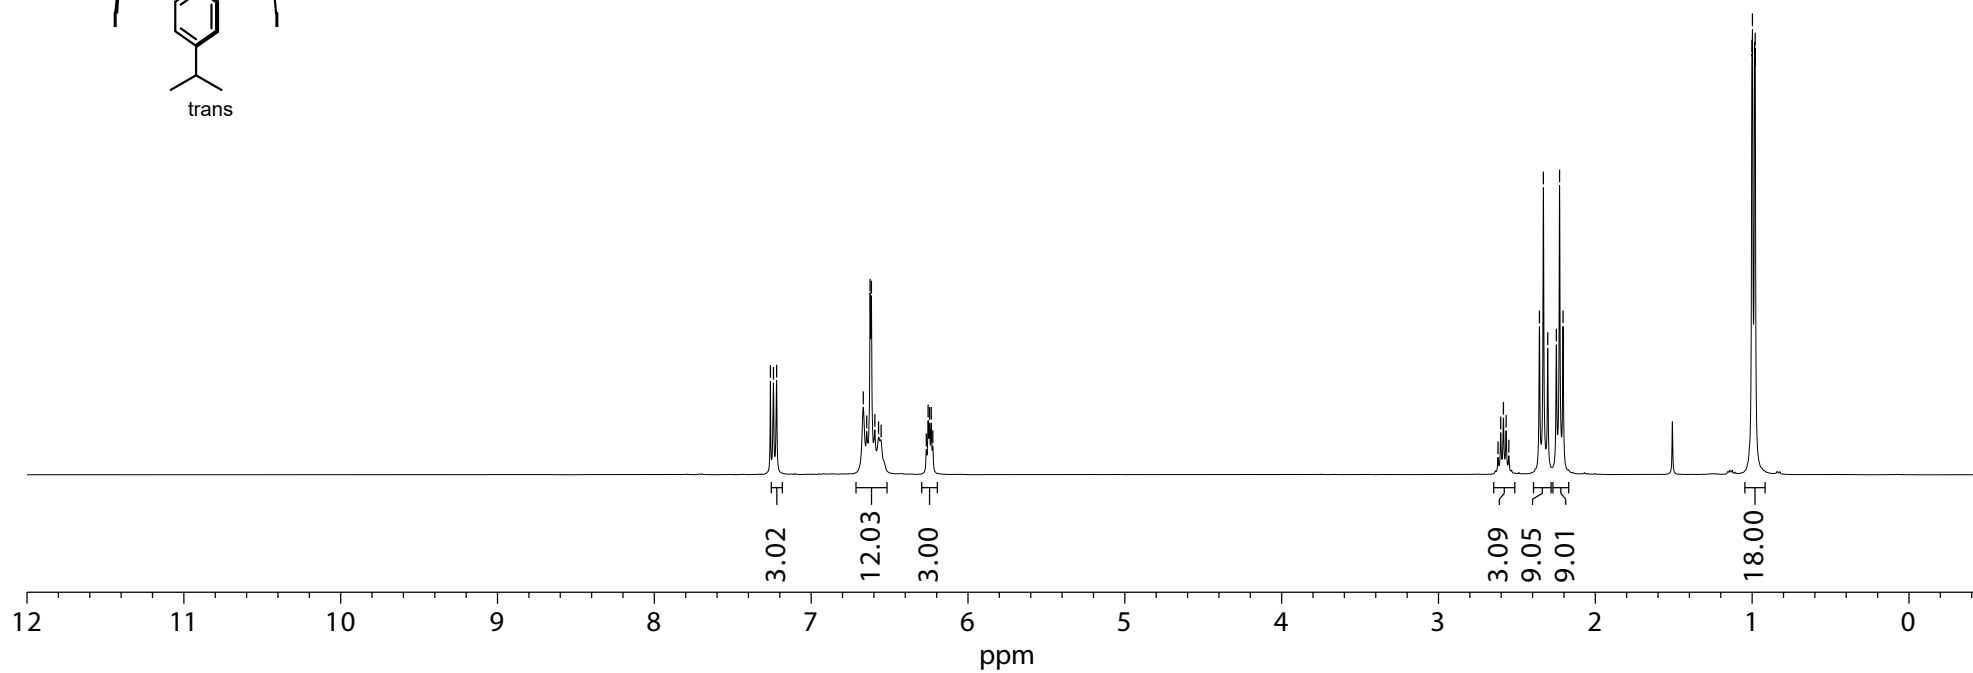

B,B',B''-Tris(3-iodo-2,6-dimethylphenyl)-N,N',N''-tris(4-isopropylphenyl)borazine-(19)

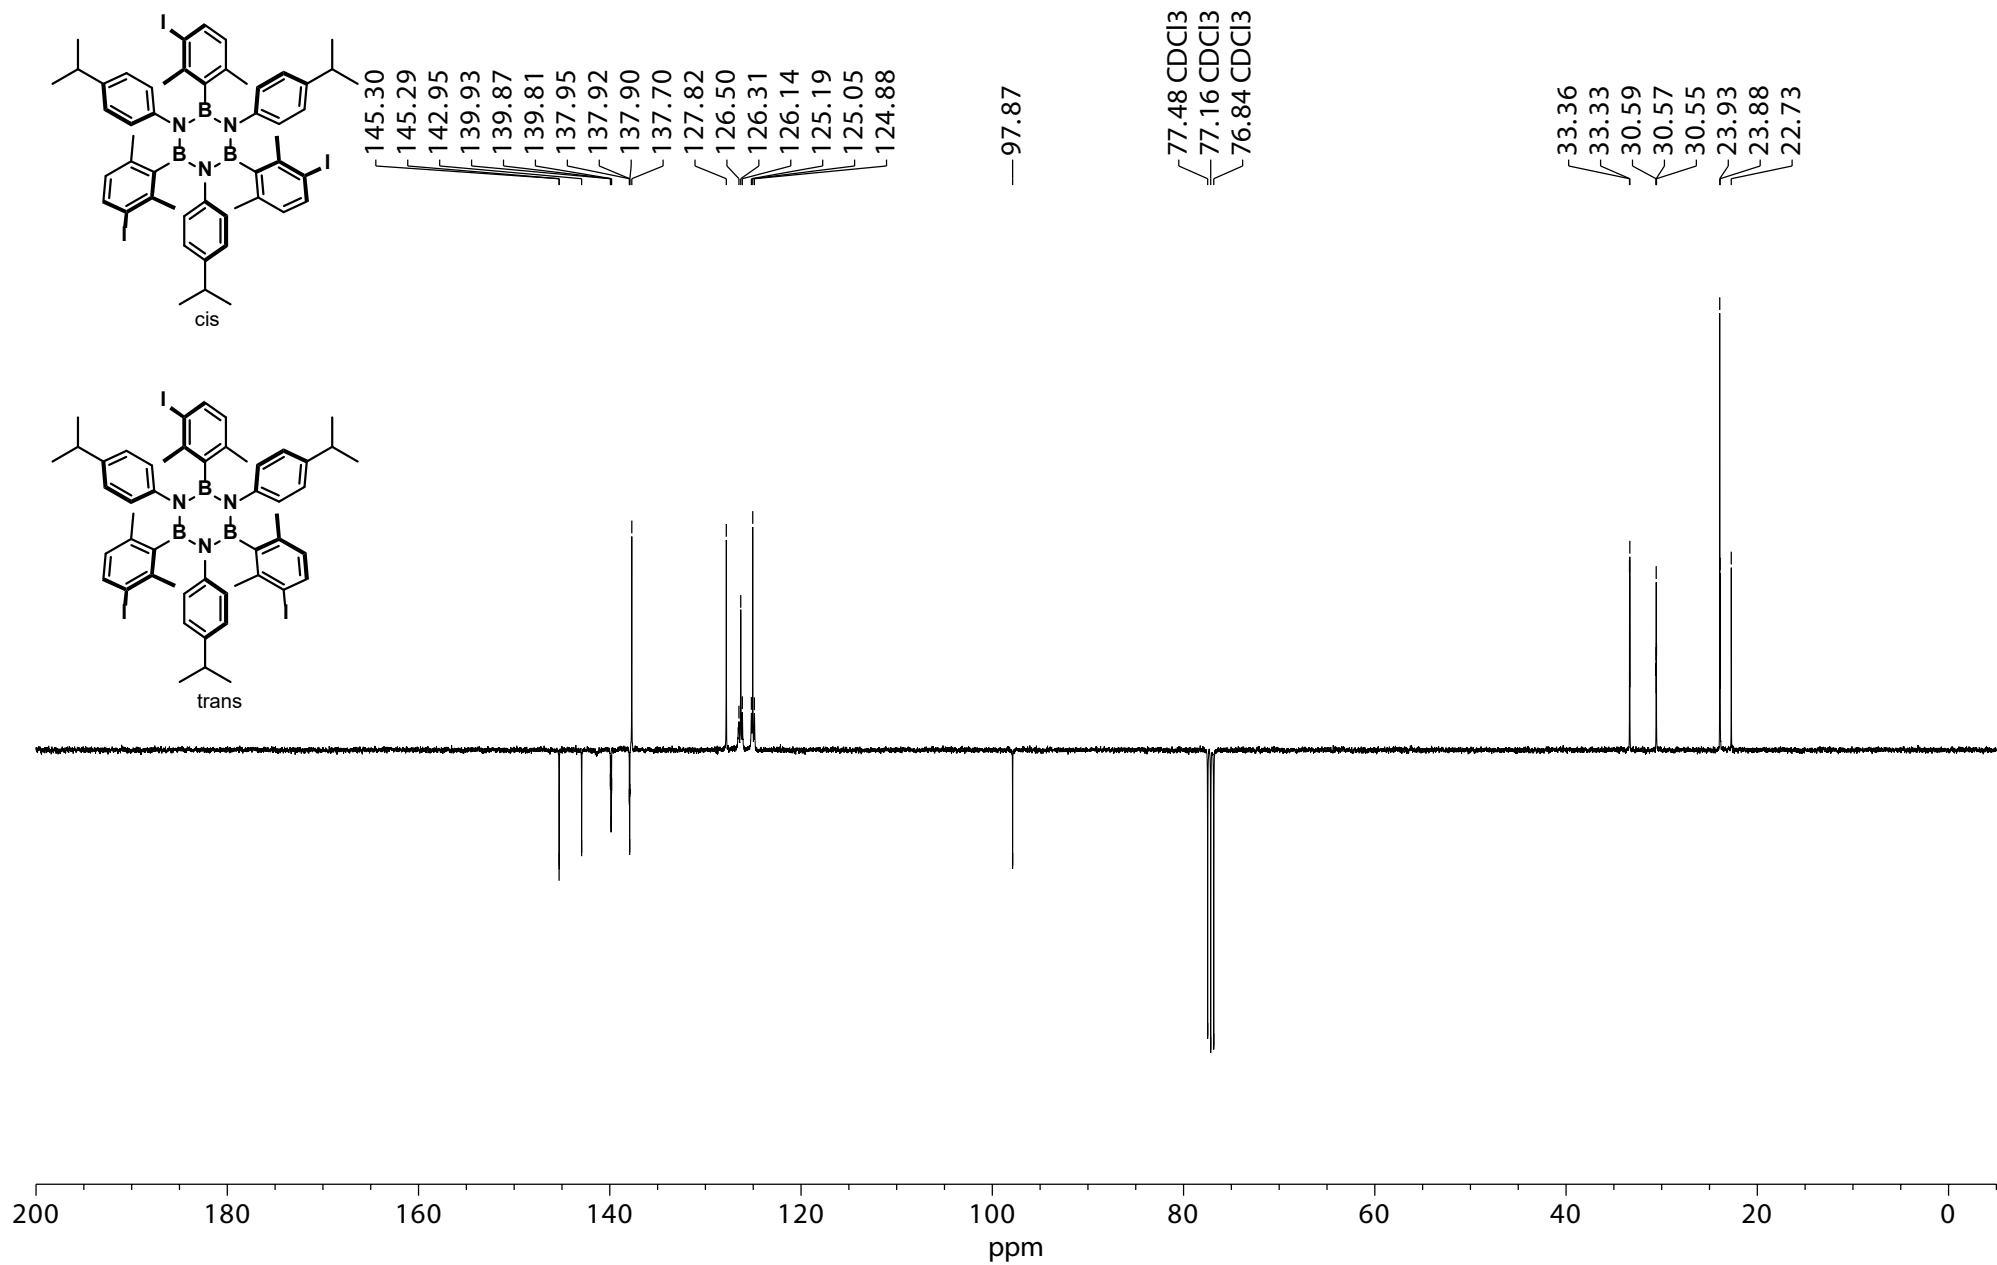



B,B',B''-Tris(3-iodo-2,6-dimethylphenyl)-N,N',N''-tris(4-isopropylphenyl)borazine-(19)

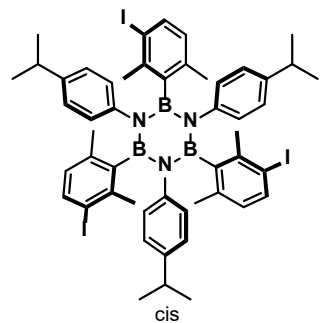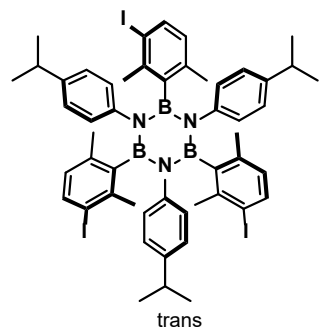

—37.1

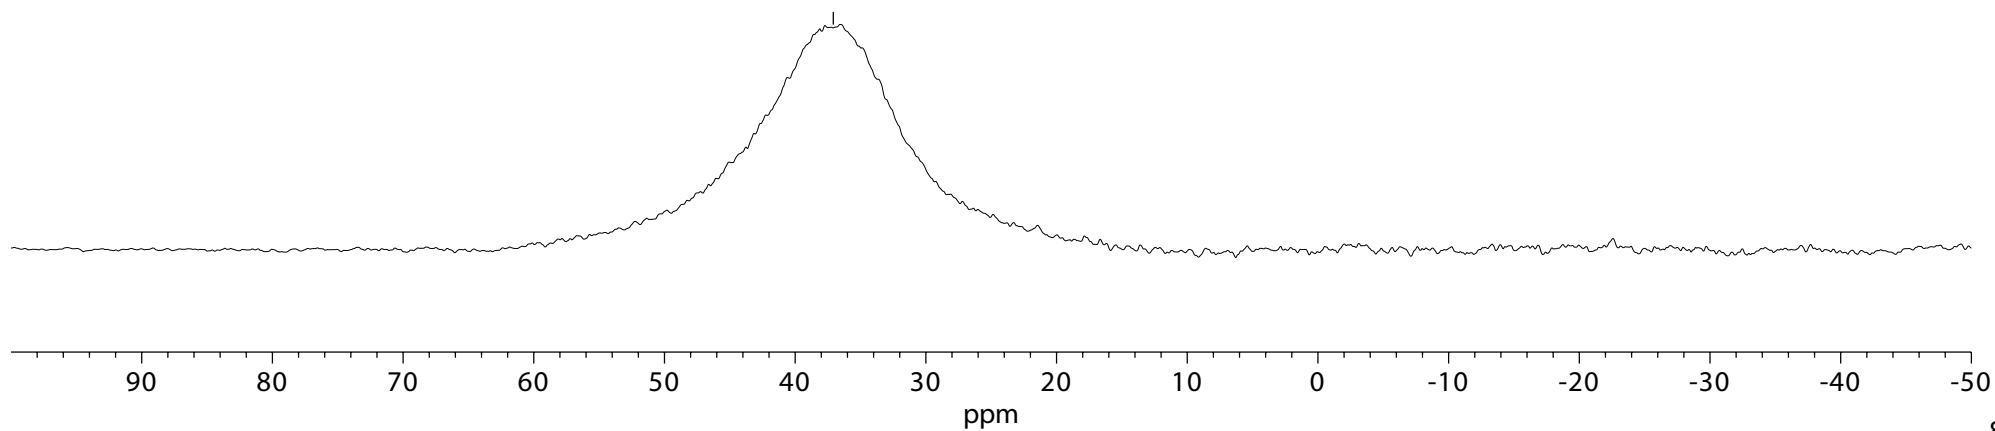

B,B',B''-Tris(2,6-dimethyl-4-(((trifluoromethyl)sulfonyl)oxy)phenyl)-N,N',N''-tris(4-iodo-3,5-dimethylphenyl)borazine-(20)

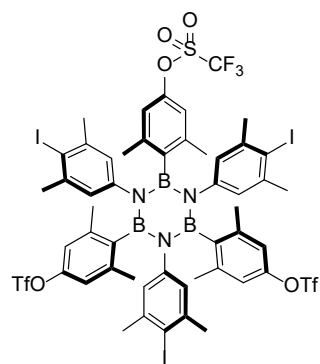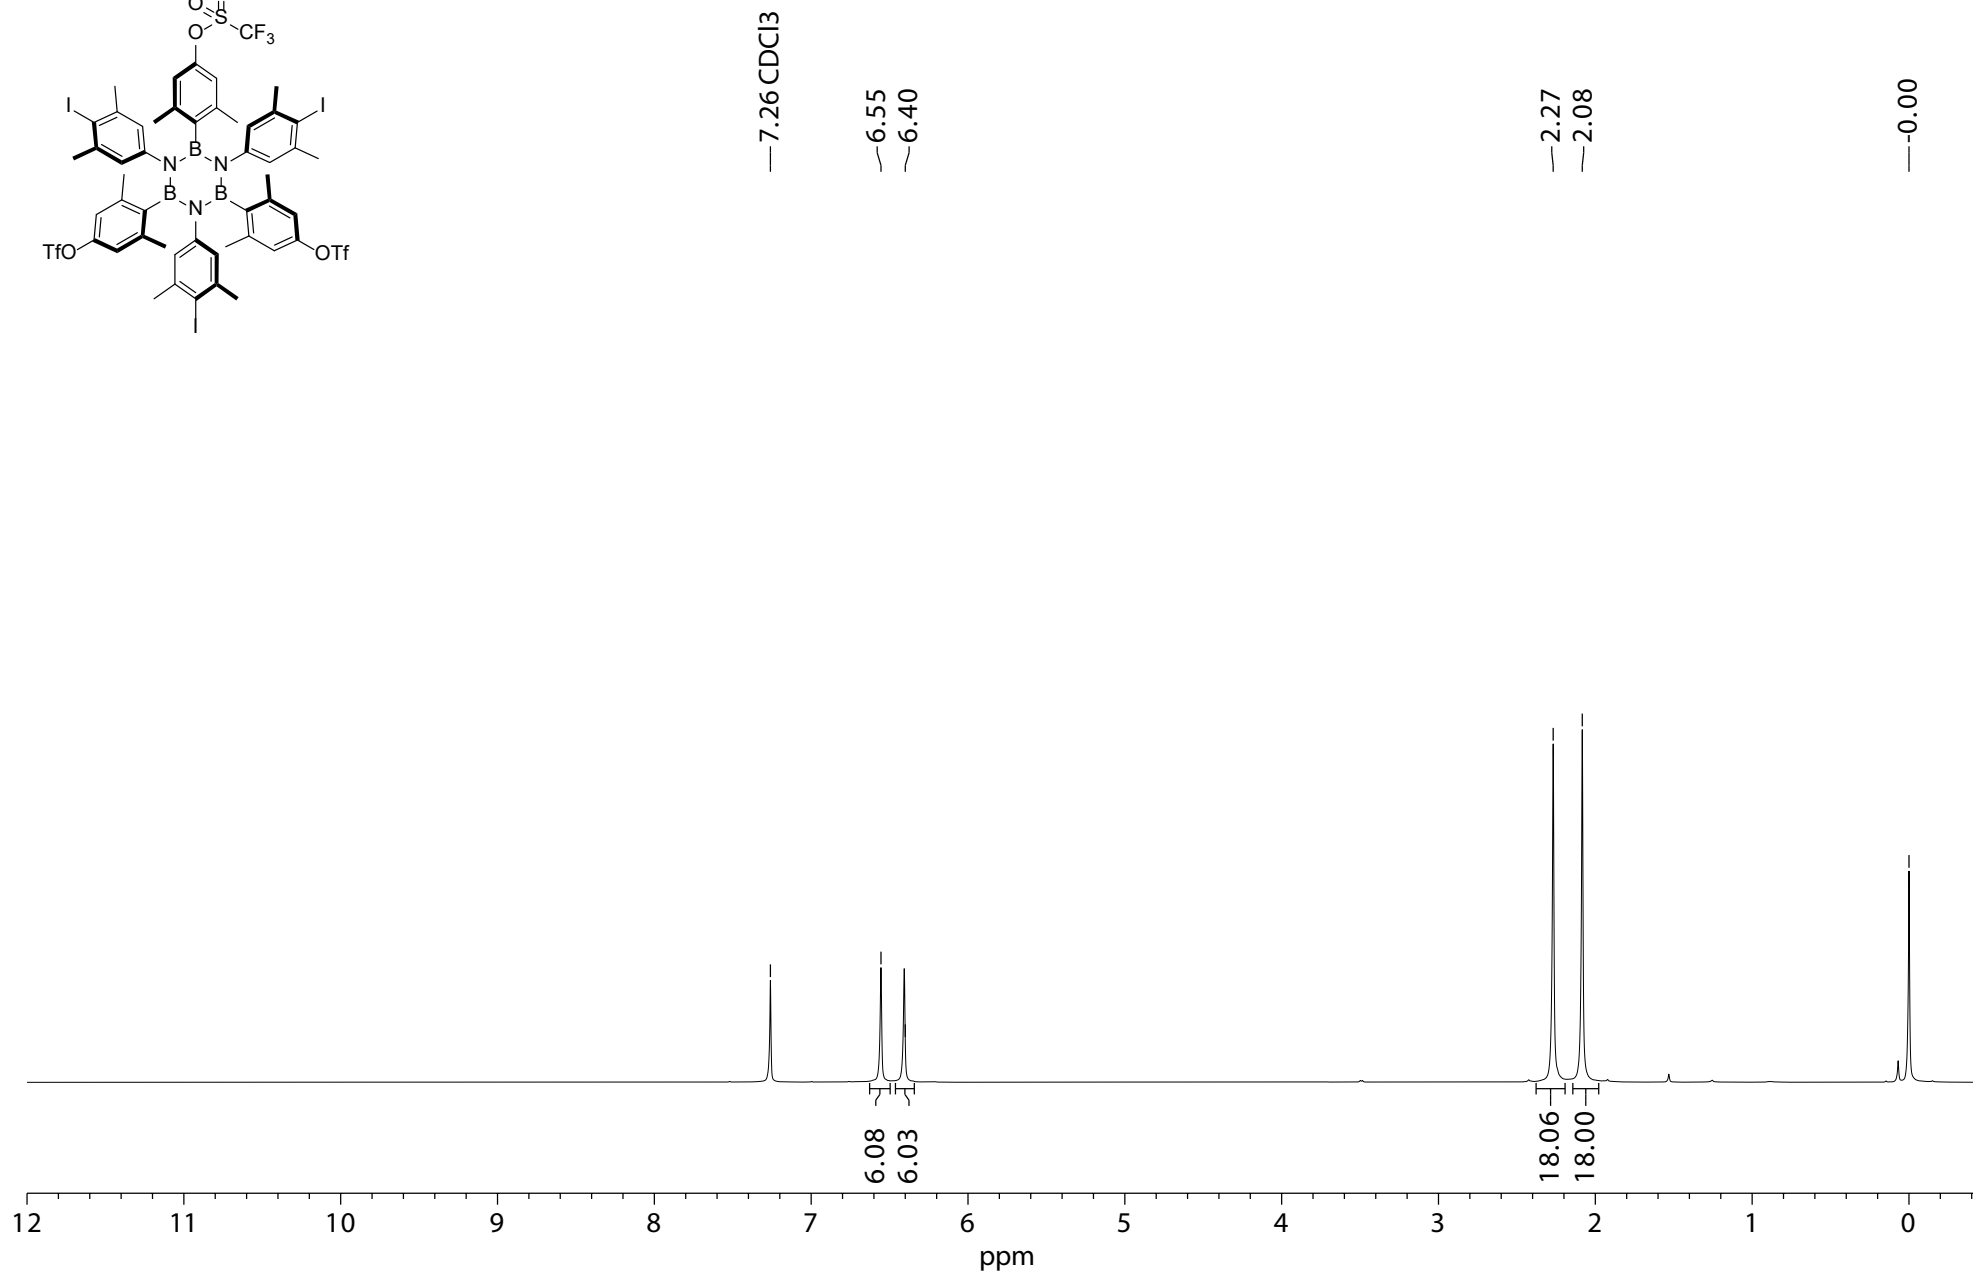

B,B',B''-Tris(2,6-dimethyl-4-(((trifluoromethyl)sulfonyl)oxy)phenyl)-N,N',N''-tris(4-iodo-3,5-dimethylphenyl)borazine-(20)

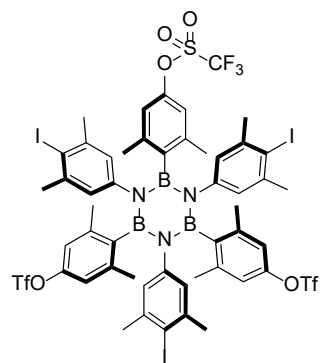

- 149.36
- 144.12
- 141.15
- 140.18
- 125.04
- 123.55
- 120.36
- 118.46
- 117.17
- 113.98
- 103.94
- 77.48 CDCl3
- 77.16 CDCl3
- 76.84 CDCl3
- 29.10
- 23.18
- 0.15

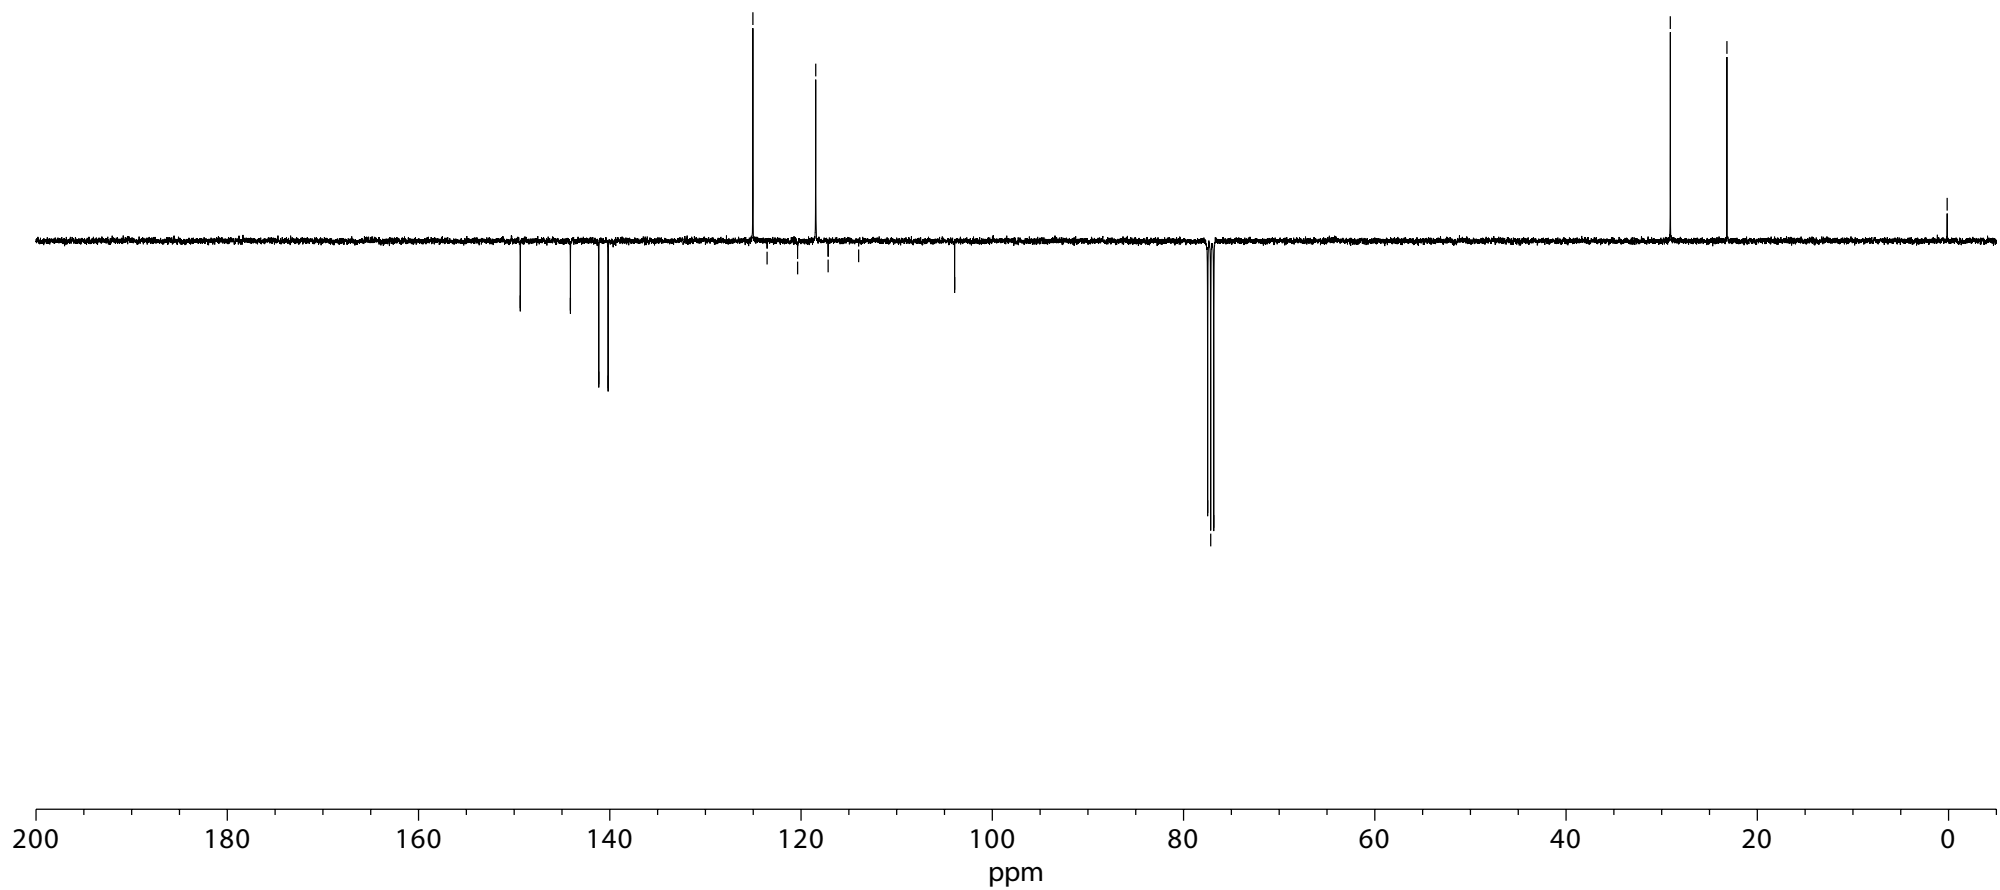

B,B',B''-Tris(2,6-dimethyl-4-(((trifluoromethyl)sulfonyl)oxy)phenyl)-N,N',N''-tris(4-iodo-3,5-dimethylphenyl)borazine-(20)

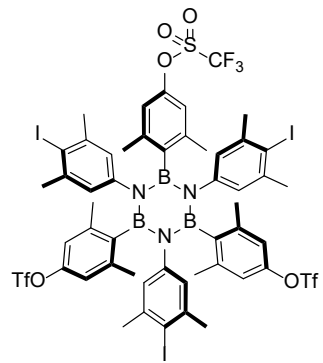

—36.7

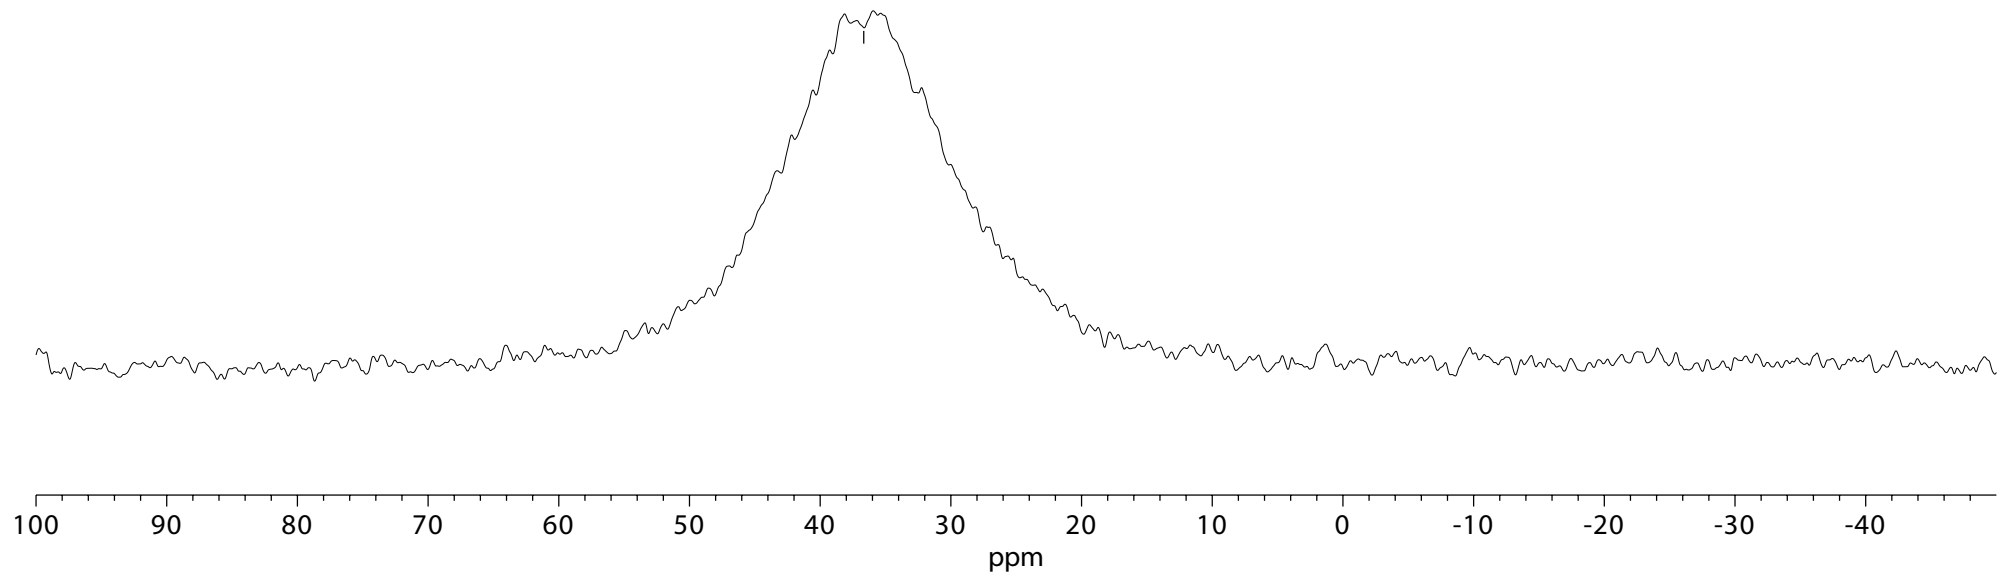

B,B',B''-Tris(2,6-dimethyl-4-(((trifluoromethyl)sulfonyl)oxy)phenyl)-N,N',N''-tris(4-iodo-3,5-dimethylphenyl)borazine-(20)

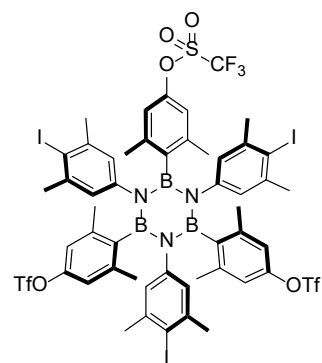

---72.8

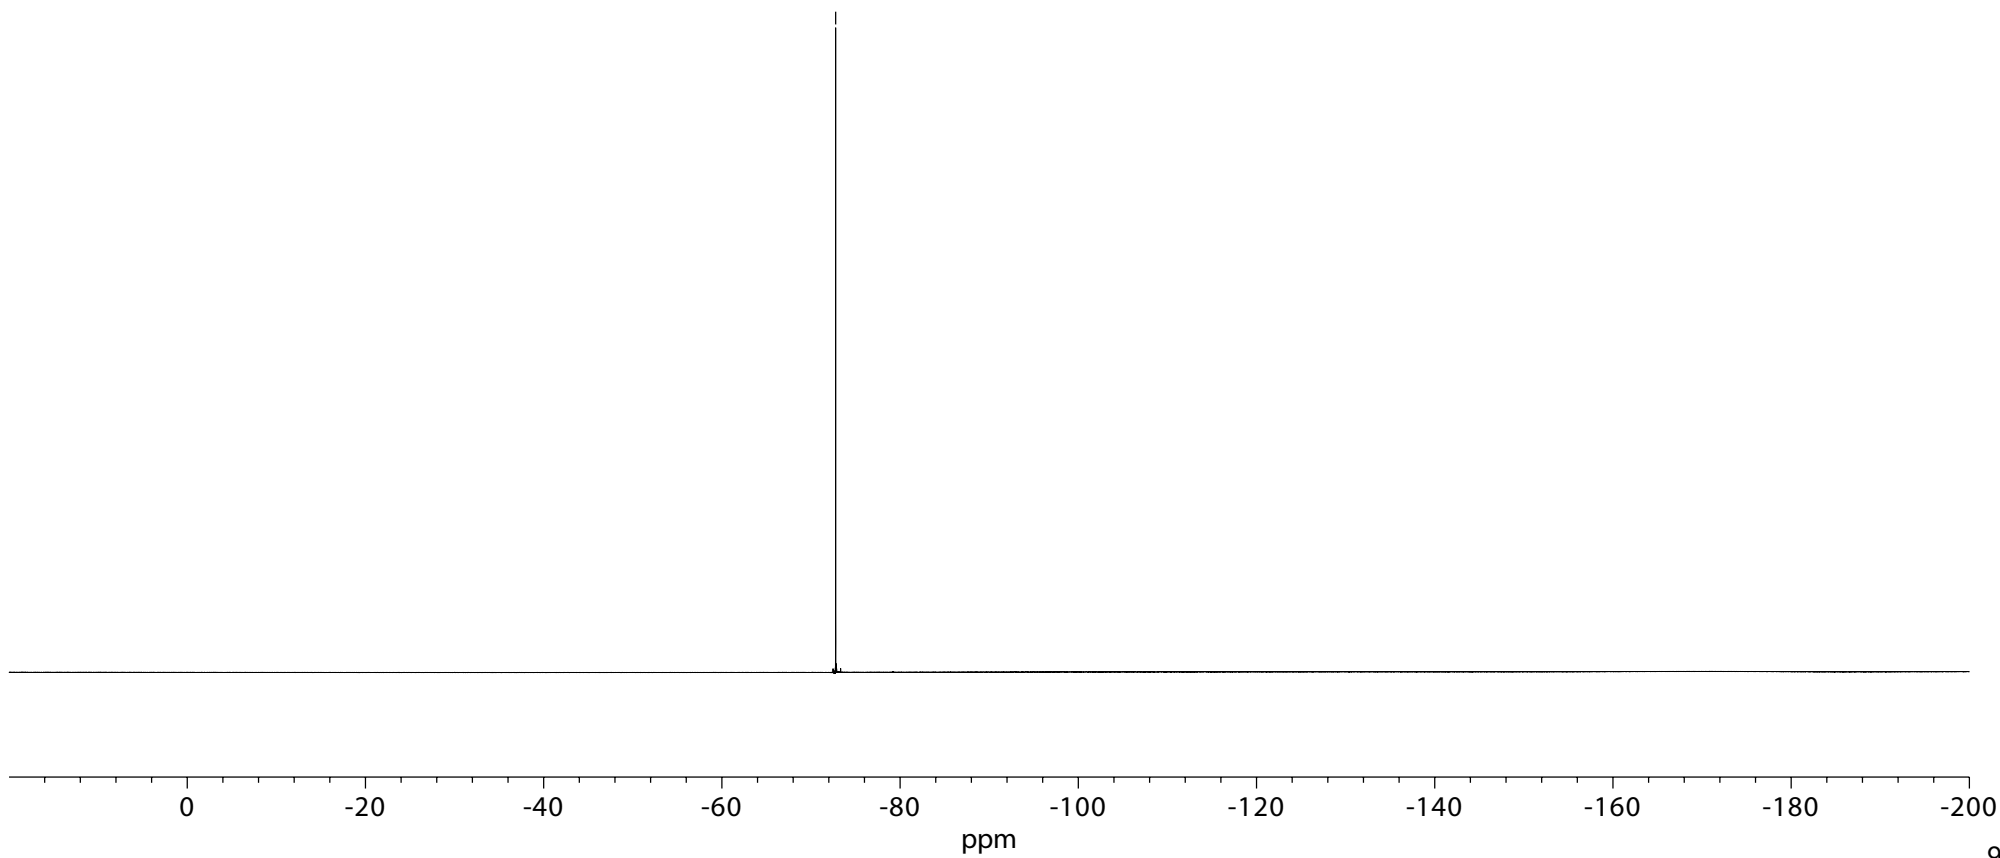

B,B',B''-Tris(2,6-dimethyl-4-(((trifluoromethyl)sulfonyl)oxy)phenyl)-  
N,N',N''-tris(4-(3-methoxy-3-oxoprop-1-en-1-yl)-3,5-dimethylphenyl)borazine-(21)

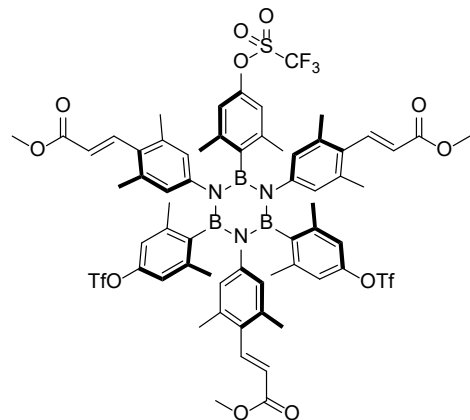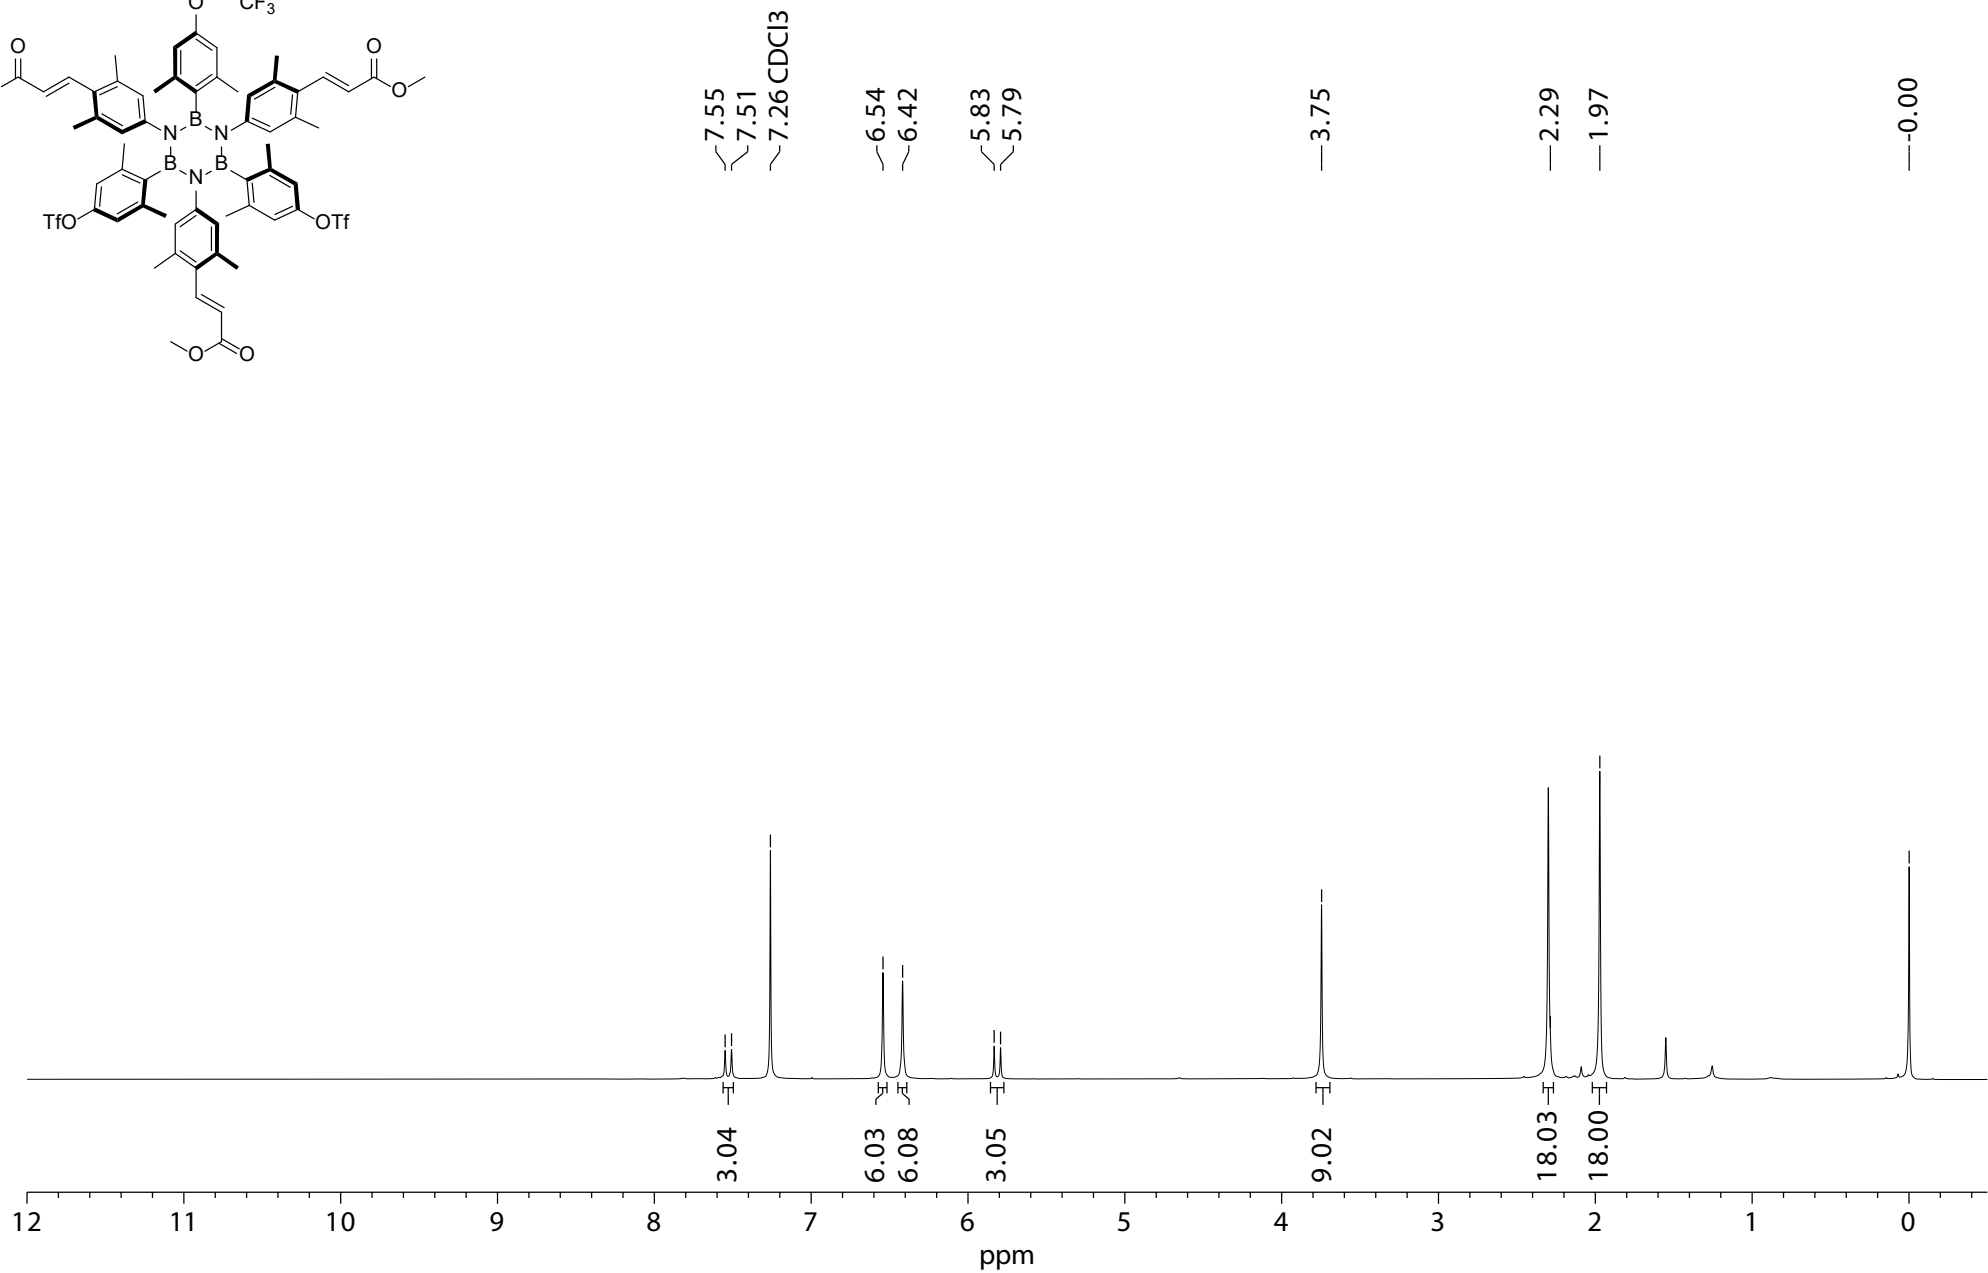

B,B',B''-Tris(2,6-dimethyl-4-(((trifluoromethyl)sulfonyl)oxy)phenyl)-  
N,N',N''-tris(4-(3-methoxy-3-oxoprop-1-en-1-yl)-3,5-dimethylphenyl)borazine-(21)

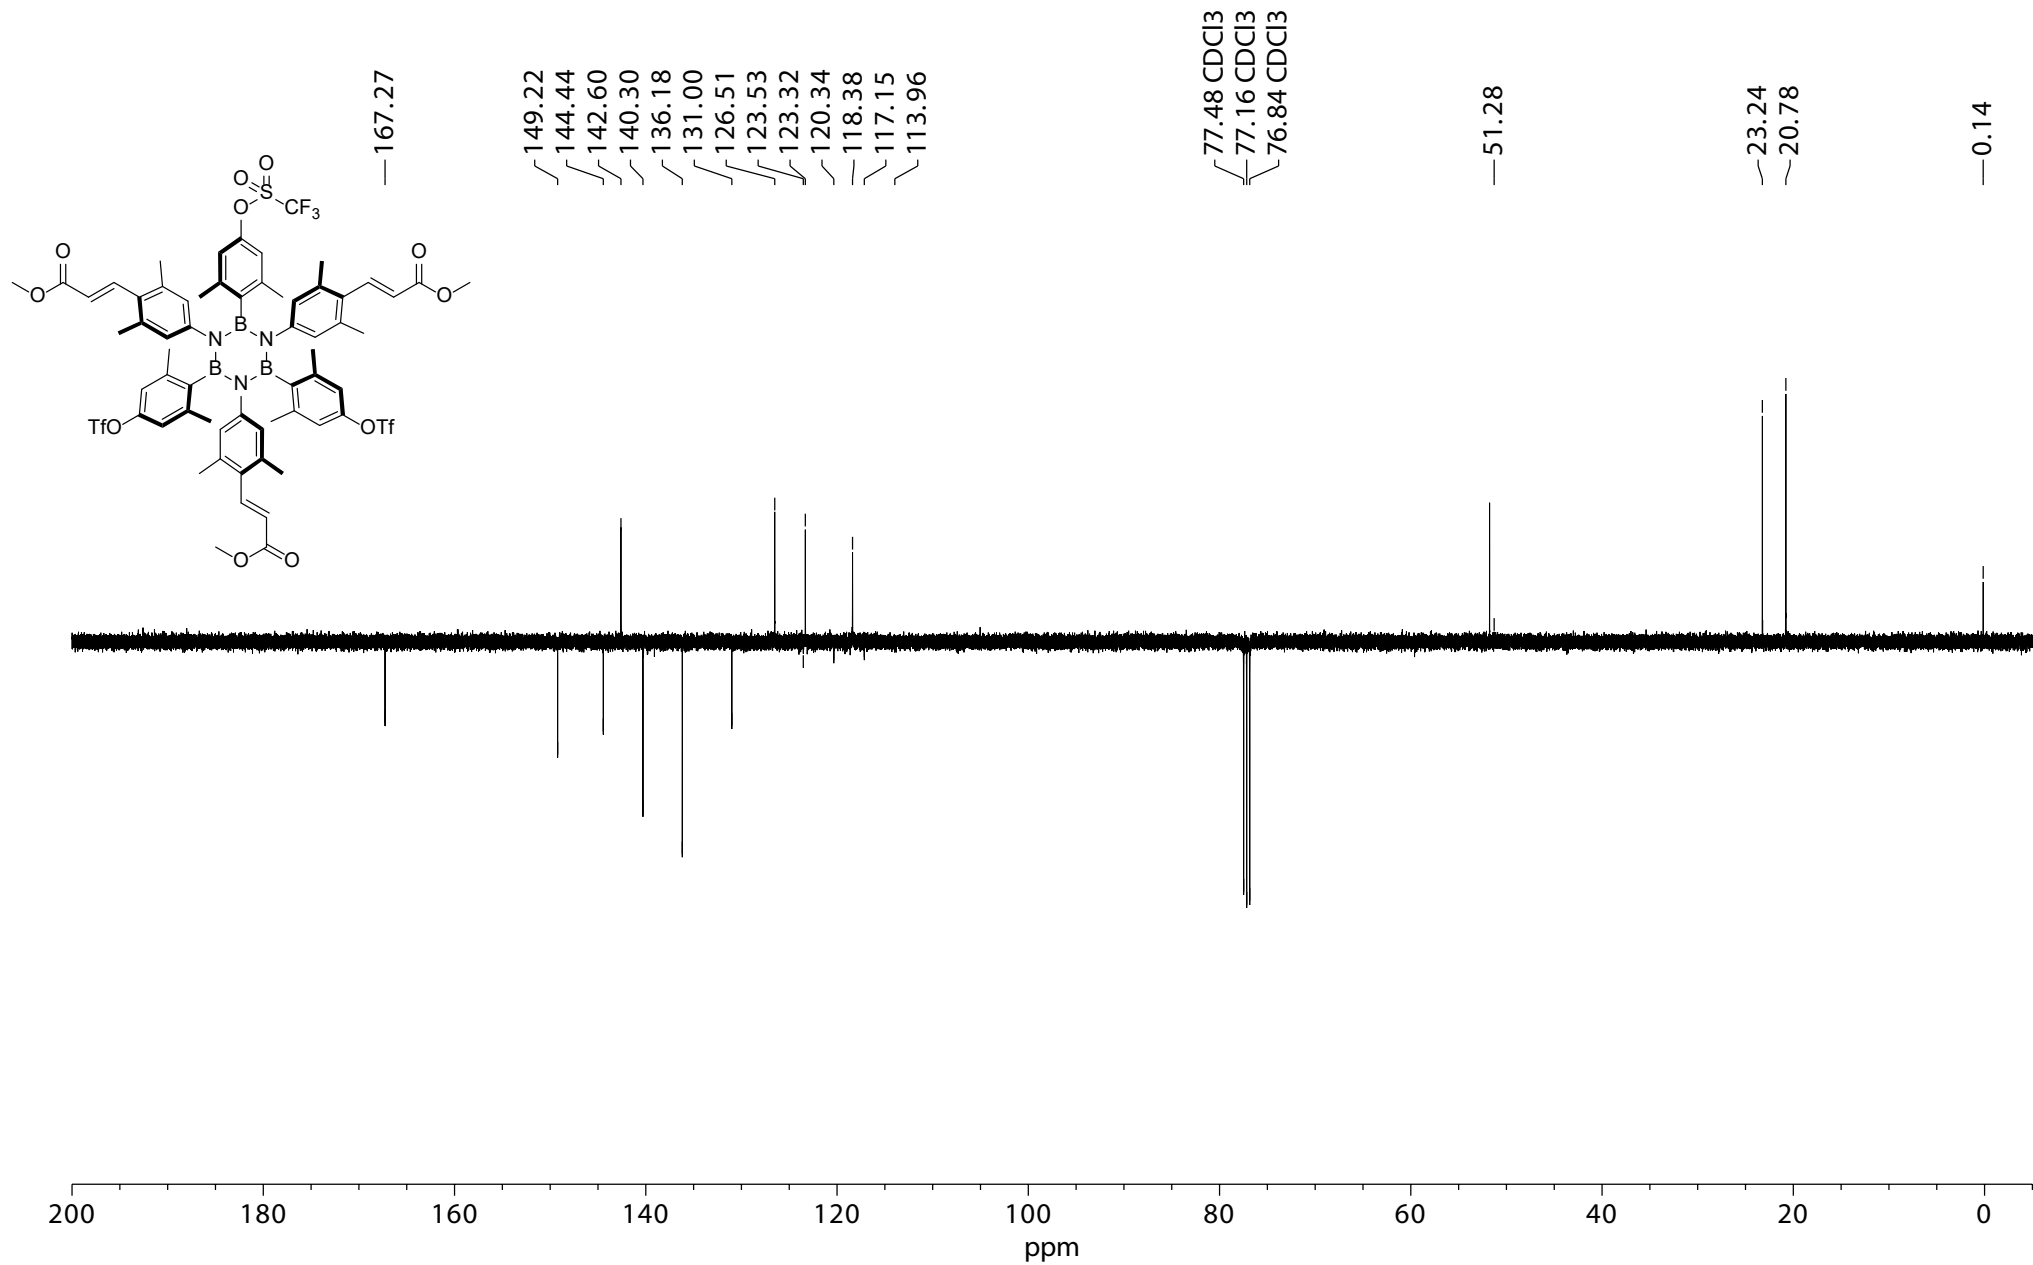

B,B',B''-Tris(2,6-dimethyl-4-(((trifluoromethyl)sulfonyl)oxy)phenyl)-  
N,N',N''-tris(4-(3-methoxy-3-oxoprop-1-en-1-yl)-3,5-dimethylphenyl)borazine-(21)

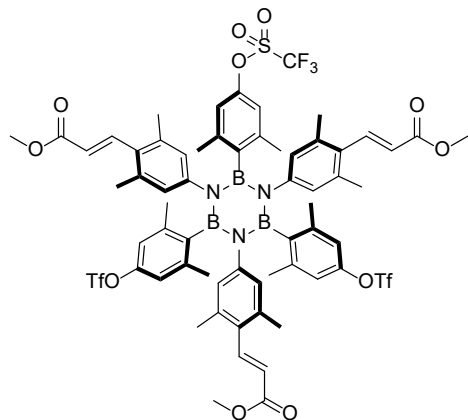

—37.4

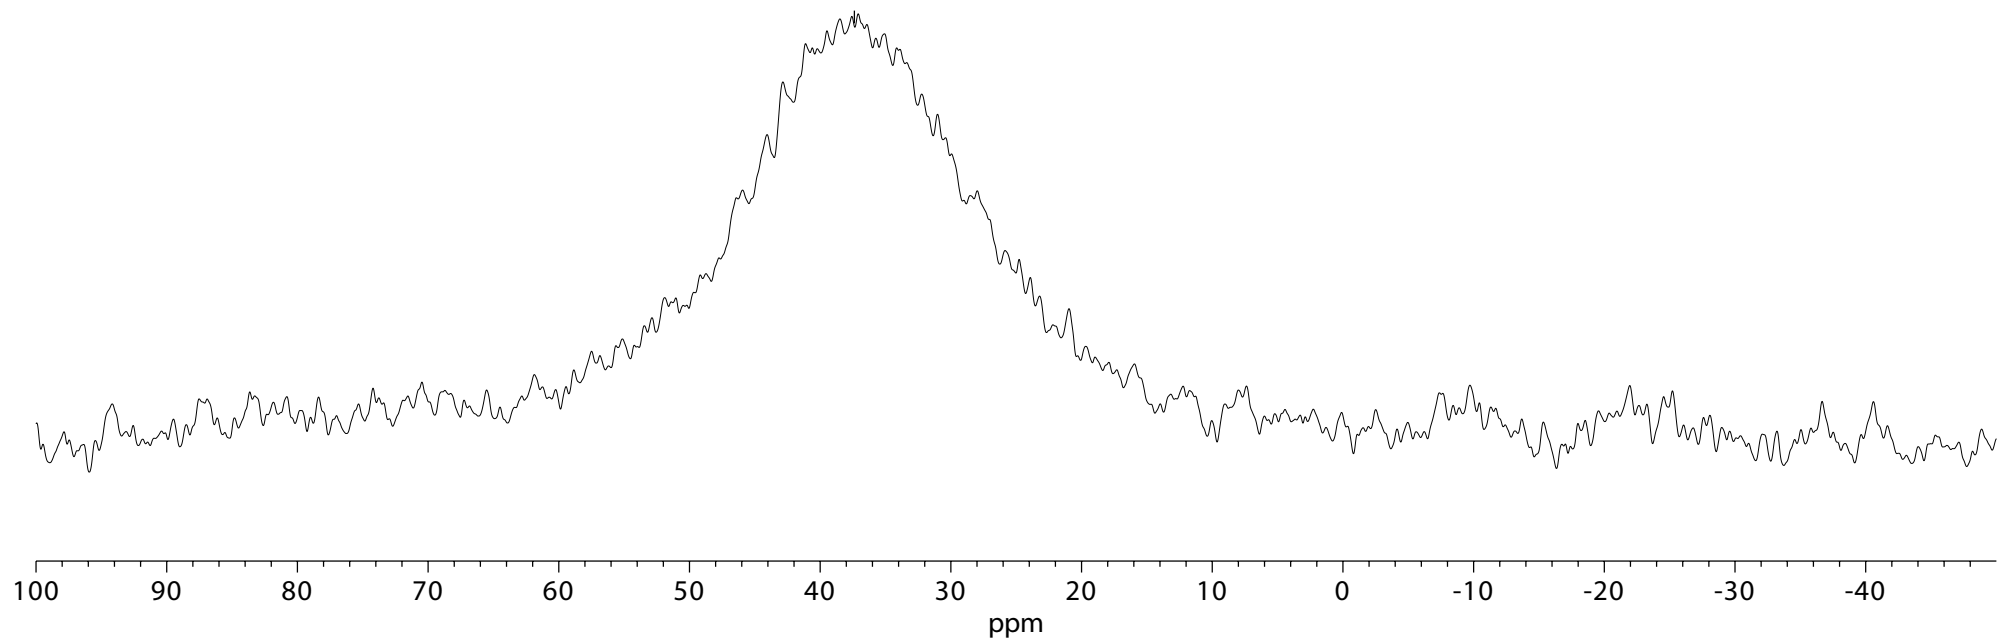



B,B',B''-Tris(2,6-dimethyl-4-(((trifluoromethyl)sulfonyl)oxy)phenyl)-  
N,N',N''-tris(4-(3-methoxy-3-oxoprop-1-en-1-yl)-3,5-dimethylphenyl)borazine-(21)



--73.0

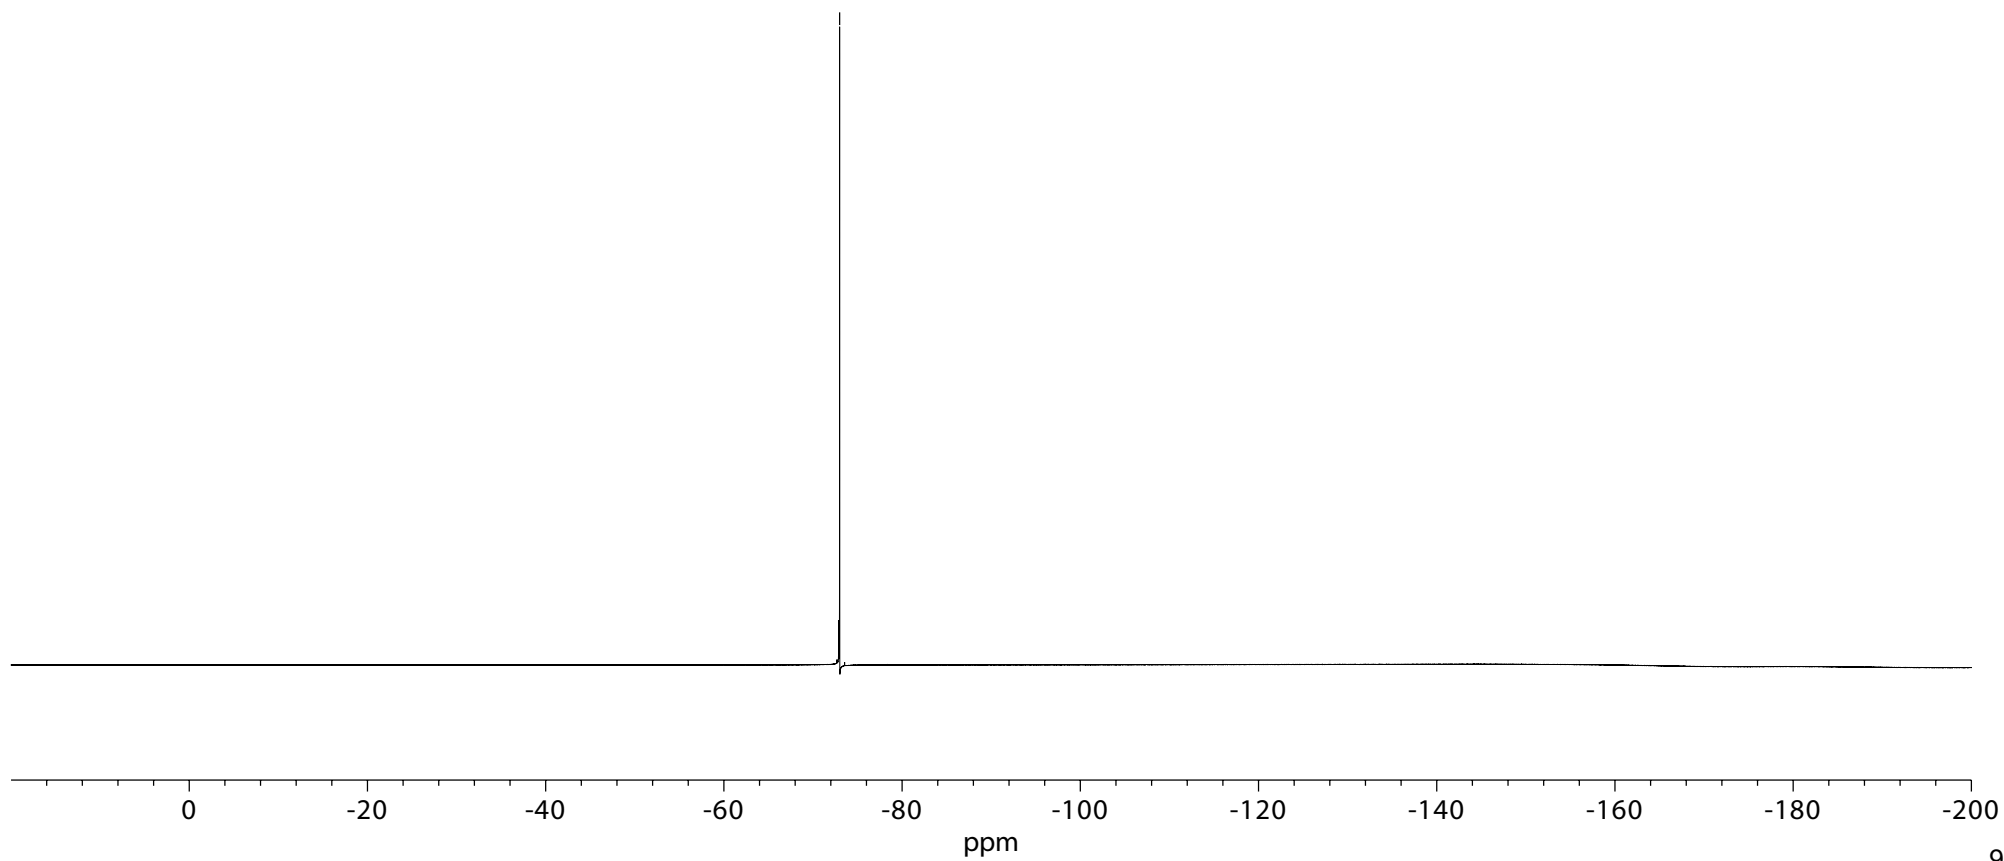

(4-bromo-3,5-dimethylphenoxy)(tert-butyl)dimethylsilane (22)

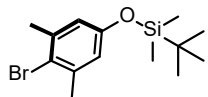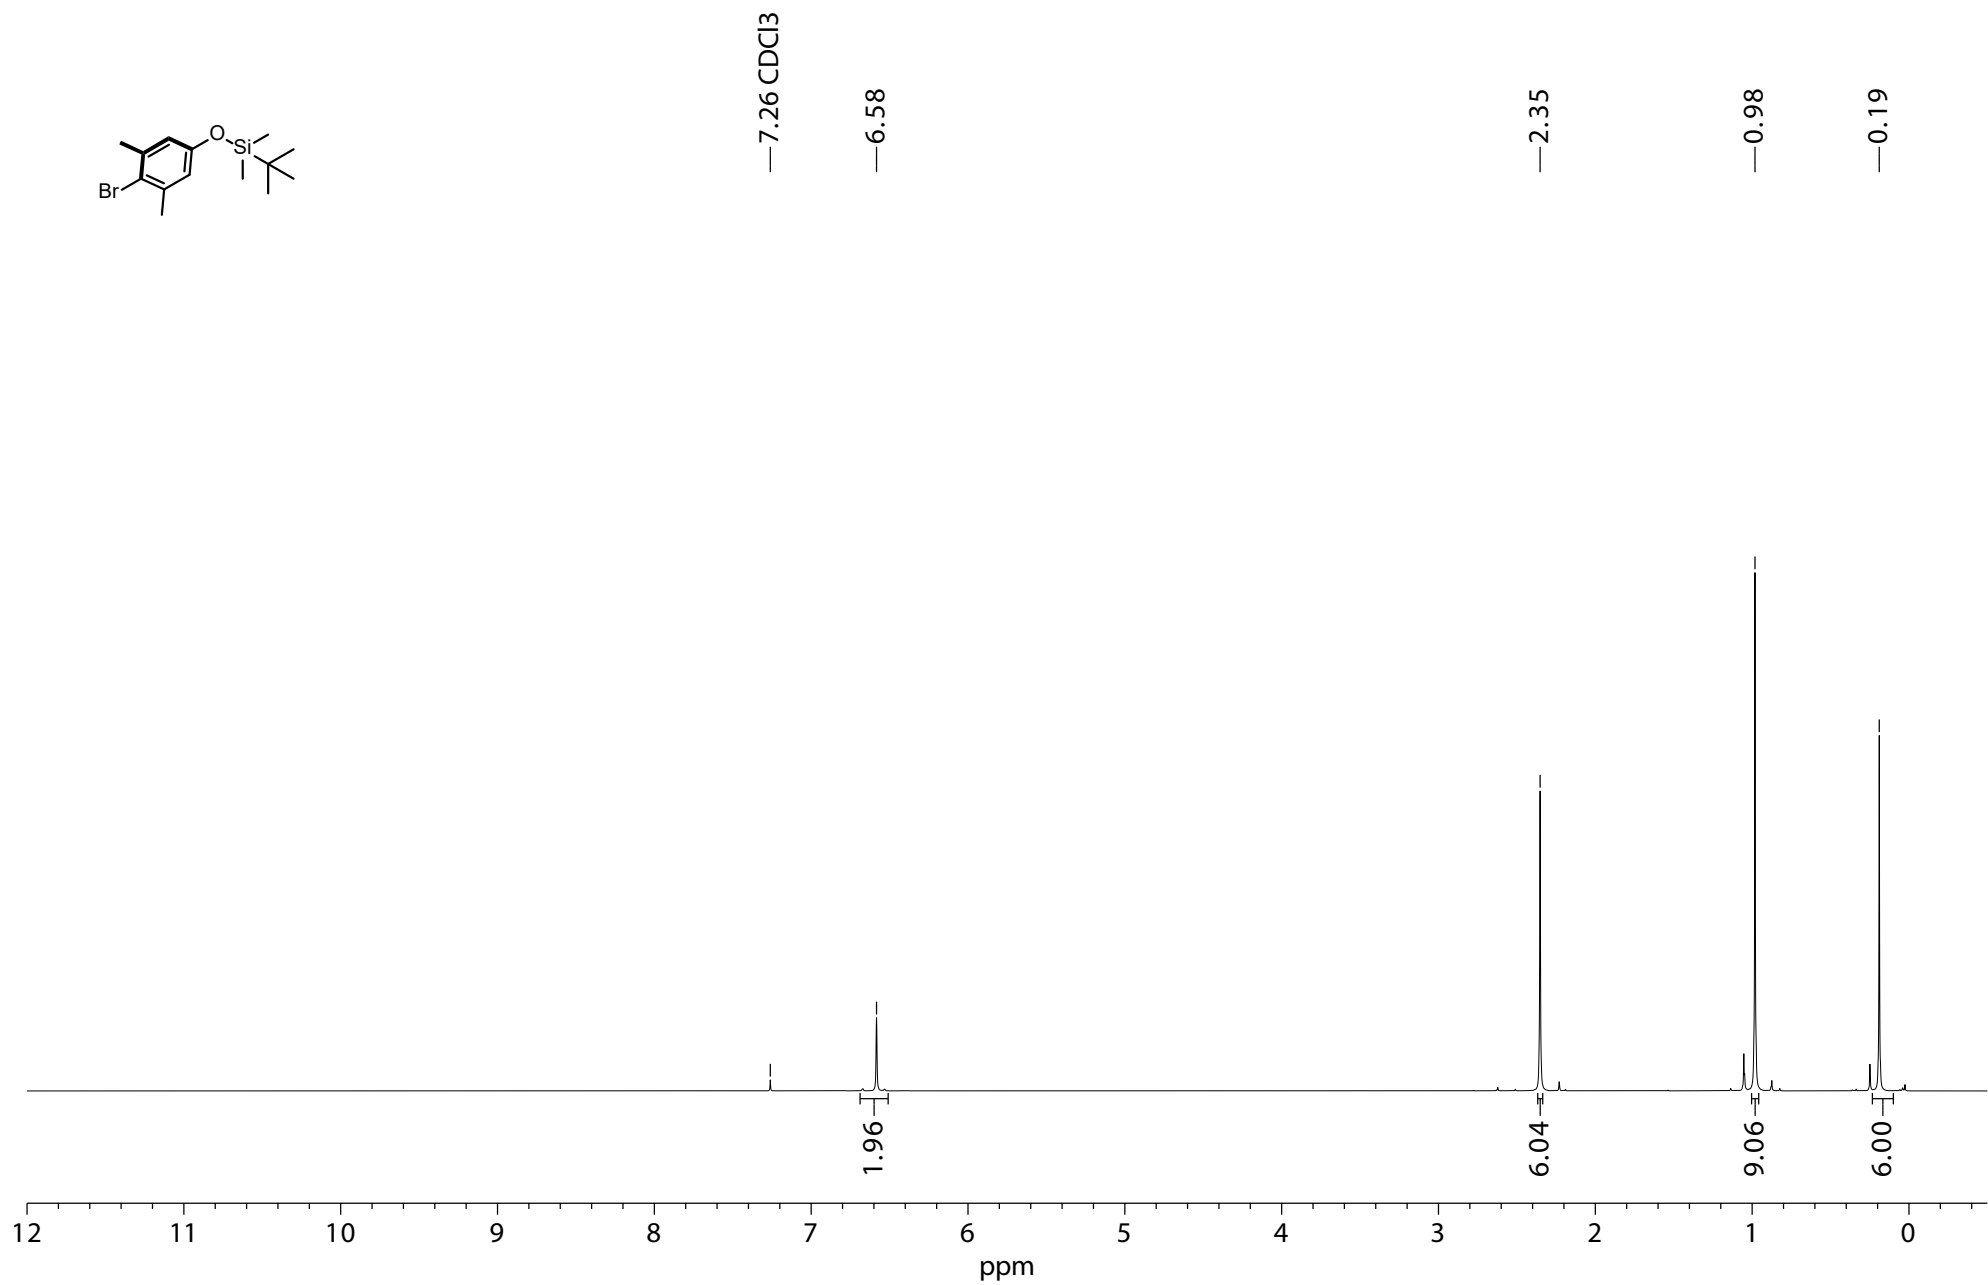

(4-bromo-3,5-dimethylphenoxy)(tert-butyl)dimethylsilane (22)

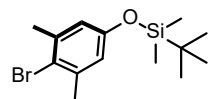

—154.28

—139.15

120.06  
119.12

77.48 CDCl<sub>3</sub>  
77.16 CDCl<sub>3</sub>  
76.84 CDCl<sub>3</sub>

25.81  
24.03  
18.33

—4.29

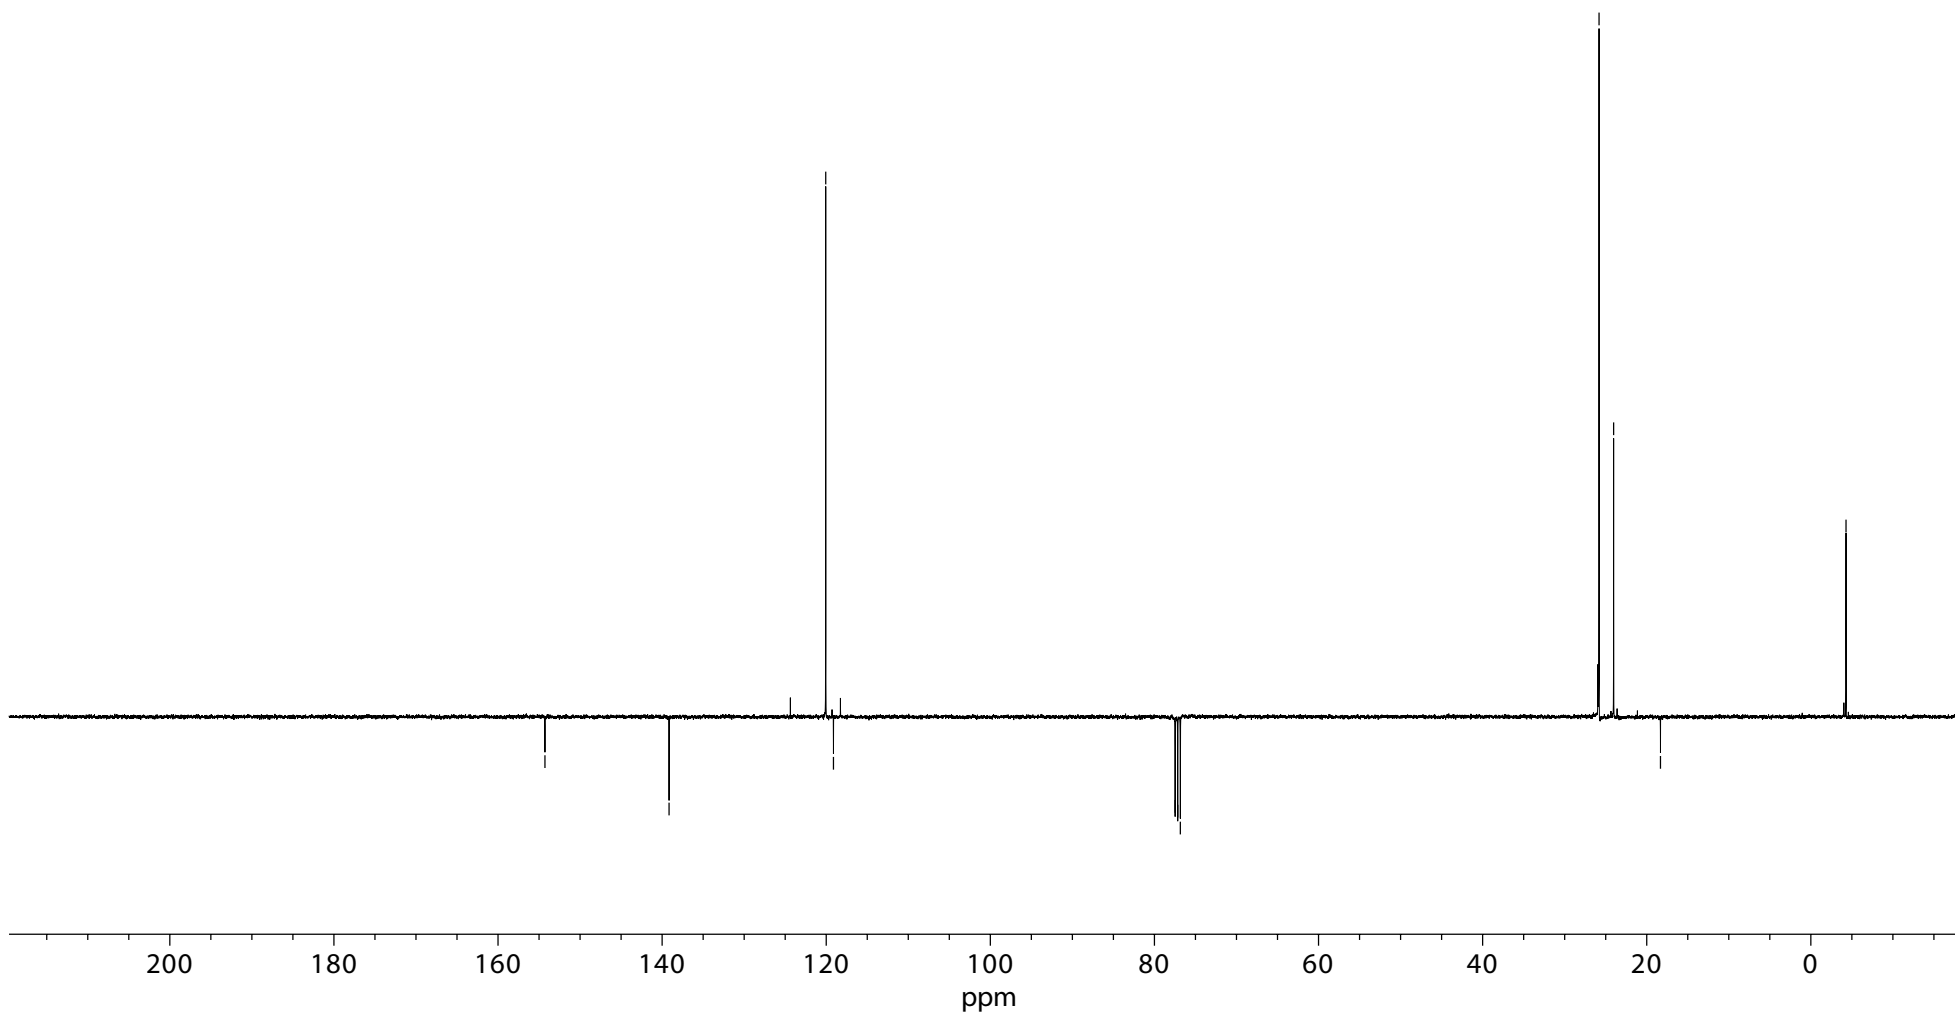

Supplement: d4gc00699b1.pdf [file d4gc00699b1.pdf]
